# Supplementary material for: Cell-intrinsic Aryl Hydrocarbon Receptor signalling is required for the resolution of injury-induced colonic stem cells
Source: Research Square preprint supplement (doi:10.21203/rs.3.rs-827700/v1), 2021-09-02
Supplement: Supplementary file 1 [file 04ee4234122ae65005a05b83.pdf]

WENR\_WT

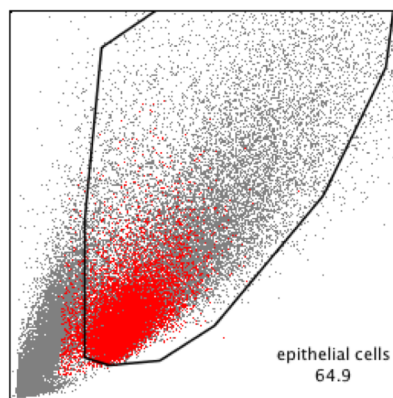

**Ungated**

- (epithelial cells)  
Single Cells  
Single Cells  
viability

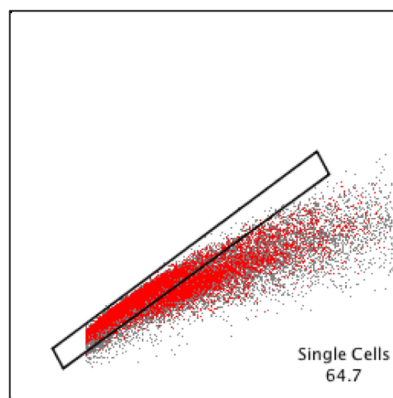

**epithelial cells**

epithelial cells  
- (Single Cells)  
- (Single Cells)  
viability

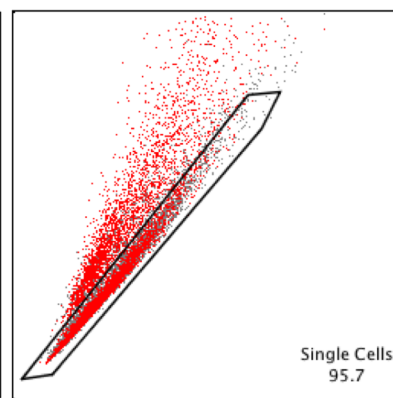

epithelial cells  
**Single Cells**

epithelial cells  
- (Single Cells)  
- (Single Cells)  
viability

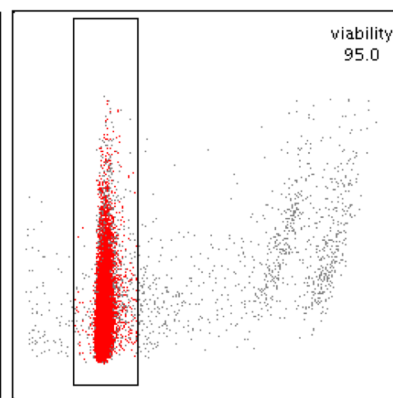

epithelial cells  
Single Cells  
**Single Cells**

epithelial cells  
Single Cells  
Single Cells  
viability

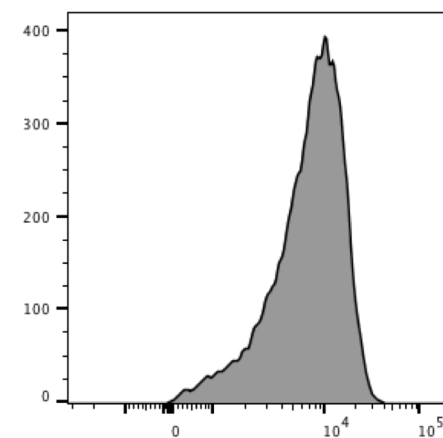

450\_50-Violet-A :: SCA1

D4 ENR\_WT

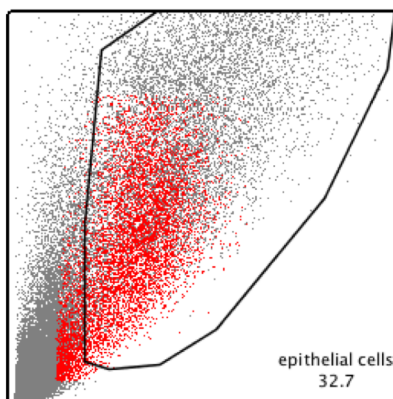

**Ungated**

- (epithelial cells)  
Single Cells  
Single Cells  
viability

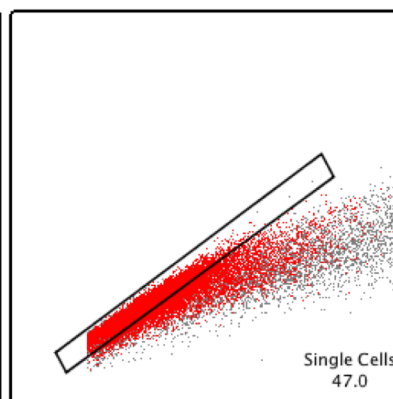

**epithelial cells**

epithelial cells  
- (Single Cells)  
- (Single Cells)  
viability

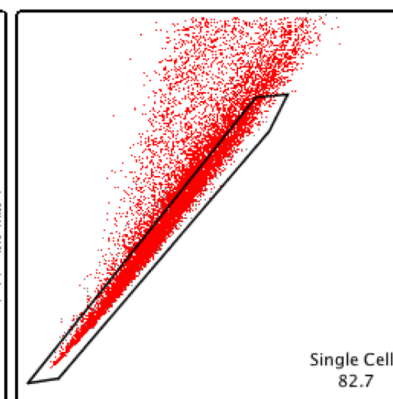

epithelial cells  
**Single Cells**

epithelial cells  
- (Single Cells)  
- (Single Cells)  
viability

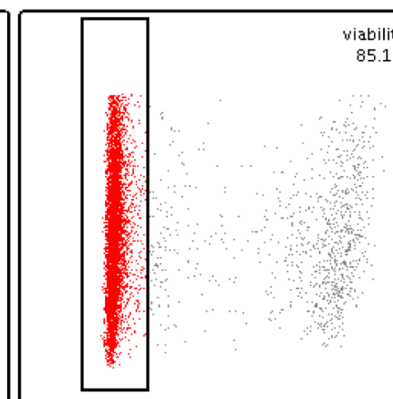

epithelial cells  
Single Cells  
**Single Cells**

epithelial cells  
Single Cells  
Single Cells  
viability

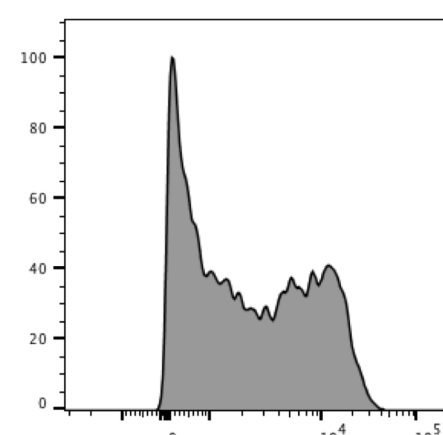

450\_50-Violet-A :: SCA1

Example gating strategy (back gating) for SCA-1 MFI analysis

WENR\_AHRKO.2 (pre-sort)

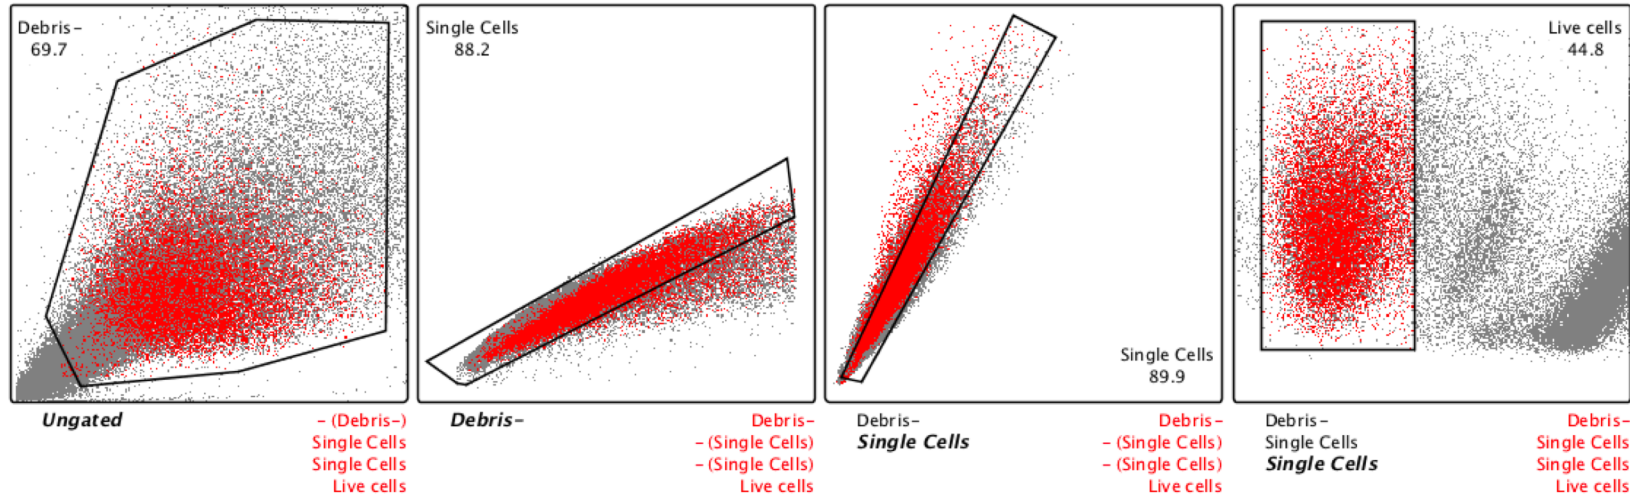

WENR\_AHRKO.2 (purity check)

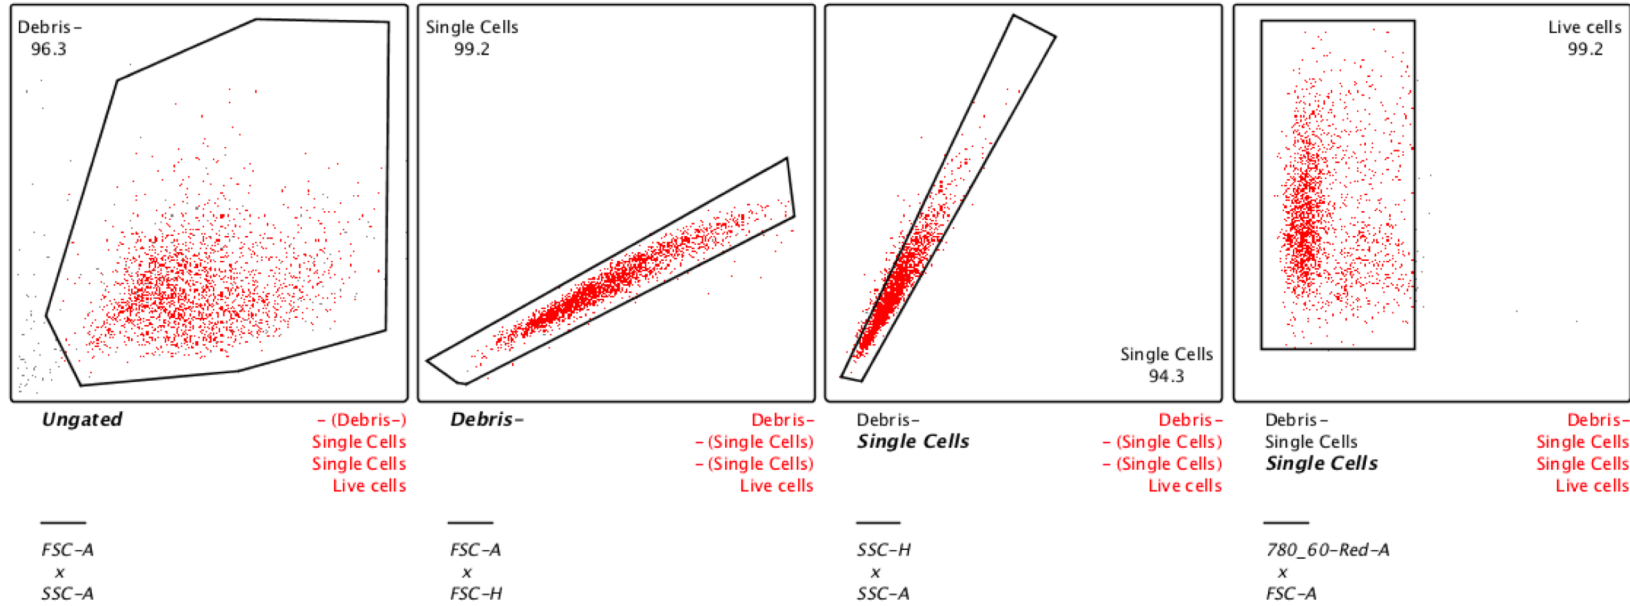

Example gating strategy (back gating) for ATAC-seq sort
