# Supplementary material for: Cell-intrinsic Aryl Hydrocarbon Receptor signalling is required for the resolution of injury-induced colonic stem cells
Source: Research Square preprint supplement (doi:10.21203/rs.3.rs-827700/v1), 2021-09-02
Supplement: Supplementary file 1 [file 6c4b16a47afa369c8af7a019.xlsx]

## Sheet: Index
	Gene lists used for comparison with RNA-seq datasets
	Table 1	IPA-generated list of predicted upstream transcriptional regulators in WENR conditions (AHRKO vs WT)
	Table 2	IPA-generated list of predicted upstream transcriptional regulators in d4 ENR conditions (AHRKO vs WT)
	Table 3	Complete list of AHR CHIP targets
	Table 4	List of AHR CHIP targets that overlap with genes differentially regulated upon 4h FICZ-treatment in WT WENR organoids (in an AHR-dependent manner) and/or overlap with DEGs from d4 ENR AHRKO vs WT RNA-seq dataset
	Table 5	List of DEGs in d4 ENR AHRKO vs WT organoids that overlap with differentially accessible sites (AHRKO vs WT) in d4 ENR ATAC-seq
	Table 6	TOBIAS Bindetect output - differential binding scores of TF motifs in WT and AHR KO organoids grown in either WENR or d4 ENR conditions

## Sheet: Table 1
¬© 2000-2021 QIAGEN. All rights reserved.
Predicted Upstream Transcriptional Regulator in AHRKO vs WT organoids in WENR conditions
Upstream Regulator	Expr Log Ratio	Molecule Type	Predicted Activation State	Activation z-score	Flags	p-value of overlap	Target Molecules in Dataset	Mechanistic Network
TP53		transcription regulator	Activated	2.971		7.97e-07	ACACB,ACE,ACSF2,ADAM8,ADGRE5,AGTR1,ALDH1A1,ALDH4A1,ALOX5,AMOTL2	351 (22)
IRF2		transcription regulator	Activated	2.56		6.24e-05	BCL2,C1QTNF1,CASP1,Chil3/Chil4,CLDN2,CTSS,Ifi47,ISG15,LBP,LCN2	258 (18)
STAT5A	0.498	transcription regulator	Activated	2.243		1.16e-06	ABCG1,AKR1C3,AR,ASCL2,BCL11A,BCL2,C9orf152,CD68,CYP1B1,ESR1	372 (20)
CTNNB1		transcription regulator	Activated	2.198		2.35e-09	AHR,ALDH1A1,Ang4,AQP5,AR,ASCL2,BACE1,BCL2,BMP4,CCN2	397 (20)
STAT1		transcription regulator		1.946		8.04e-06	C3,CASP1,CCL5,Chil3/Chil4,CTSS,FGL2,GBP4,HERC6,IFI16,IFI44	282 (18)
NFKBIA		transcription regulator		1.943		1.87e-12	Abcb1b,ADGRE5,AGTR1,AMPD3,ATP11A,AZGP1,BCL11A,BCL2,BTG2,C3	342 (18)
GATA2		transcription regulator		1.746		2.01e-09	ABCA13,ADGRE5,ALOX5,ANGPTL2,AR,AZGP1,C9orf116,CCL5,CD177,CD36	175 (7)
NKX2-1		transcription regulator		1.392		3.07e-07	AQP5,Bex1,BMP4,CA8,CHIA,FAM3D,HLA-A,LCN2,LRG1,MYB
LEF1		transcription regulator		1.373		4.4e-06	AR,BCL2,CAV1,CDKN2A,CDX1,CPE,EPHX1,FRMD6,GNAO1,ITGB8	319 (21)
ZEB1		transcription regulator		1.277		6.36e-05	Abcb1b,ALDH1A1,CCN2,CDKN2A,COMMD3-BMI1,LOXL2,MAP1B,PLAU,PTGS2,TF	264 (11)
HIF1A		transcription regulator		1.252		4.55e-07	ABCC8,ACE,AGTR1,AHR,ANGPTL4,APLN,BACE1,BCL2,CAV1,CAVIN2	366 (17)
CREBBP		transcription regulator		1.234		3.4e-07	ANXA6,AR,ARHGEF3,BANK1,BCL2,CAMK2B,CCL5,CKB,CNN3,CRIM1	313 (19)
CEBPA		transcription regulator		1.173		4.16e-06	Abcb1b,ADH1C,AKR1C3,ANPEP,APLN,AQP5,BCL2,BTG2,C3,EPHX1	356 (23)
CDX2		transcription regulator		1.113		6.71e-05	AOC1,BCL2,CAV1,CDX1,CLDN2,DDC,ETS1,HNF4A,HOXD3,MEP1A
GATA4		transcription regulator		1.02		3.62e-06	ACTA1,AGTR1,BCL2,CCN2,CLDN2,EPHX1,IFI16,INHA,KRT14,KRT27	143 (8)
MRTFB		transcription regulator		0.912		2.18e-09	ACTA1,AMOTL2,CAVIN2,CCL5,CCN2,CD177,CLDN15,COL5A2,CRIM1,EYA2	204 (10)
SOX9	0.4	transcription regulator		0.856		1.38e-07	AR,CCN2,COMMD3-BMI1,CYP26B1,GDF10,GUCA2A,HIVEP3,IHH,ITGB8,KRT15	240 (10)
GATA6		transcription regulator		0.766		2.81e-05	AQP5,BCAM,BMP4,Cald1,CAV1,Chil3/Chil4,CRYL1,FOXA3,HNF4A,KRT14
KLF2		transcription regulator		0.605		8.72e-12	ACE,APLN,AQP5,BMP4,CAV1,CCL5,CCN2,CD36,CD55,CYP1B1	314 (21)
NFE2L2		transcription regulator		0.564		8.63e-05	ACE,AHR,AOX1,ARHGEF3,BCL2,CCL5,CCN2,CD36,CHGB,EPHX1	302 (16)
MRTFA		transcription regulator		0.477		6.32e-08	ACTA1,AMOTL2,CAVIN2,CCL5,CCN2,CD177,CDKN2A,CLDN15,EYA2,F2R	309 (20)
FOS		transcription regulator		0.464		1.4e-09	AGTR1,AKR1C3,APLN,C3,CCL5,Ccl7,CCN2,CD68,CLDN2,COL16A1	279 (16)
JUN		transcription regulator		0.315		1.31e-11	Abcb1b,ANGPTL2,AR,C3,CAV1,CCN2,CD68,CDKN2A,CHL1,CHST4	366 (20)
LMO2		transcription regulator		0.192		2.68e-05	ACOX2,AHR,BCL11A,BCL2,CASP1,CDKN2A,CLDN2,F2R,FNDC3B,GPRC5B
LDB1		transcription regulator		0.192		2.52e-05	ACOX2,AHR,BCL11A,BCL2,CASP1,CDKN2A,CLDN2,F2R,FNDC3B,GPRC5B
ETV4		transcription regulator		0.173		7.26e-06	CAV1,CDKN2A,MMP14,MMP7,MYB,PTGS2,SPP1,VIM,WWTR1	169 (7)
ETV5		transcription regulator		0.122		1.35e-06	AKAP5,AQP5,CAV1,CAVIN2,EGFL6,KRT13,KRT80,LCN2,MMP14,MYB
NFAT5		transcription regulator		0.081		2.17e-06	AR,C1QTNF1,CCN4,IFI16,IFIT1B,IFIT3,IGFBP7,IRGM,LCN2,Mx2	246 (17)
STAT3		transcription regulator		0.076		2.24e-09	AHR,ALDH1A1,ANGPTL4,BCL2,CASP1,CCL5,CCN2,CDKN2A,ESR1,FERMT2	310 (20)
JUND		transcription regulator		0		1.41e-05	AGTR1,C3,CCL5,Ccl7,CDKN2A,MMP7,NOX4,NTS,PLAU,RUNX2	337 (18)
TP63		transcription regulator		-0.086		3.75e-05	AHR,BMP4,CAVIN2,CCN2,CDKN2A,CYP2F1,EDN2,F2R,IGFBP2,IGFBP7	274 (17)
HNF1B		transcription regulator		-0.13		5.22e-06	COL5A2,FBLIM1,FOXA3,HNF1A,HNF4A,IHH,LAMB1,MMP7,NR1H4,NR5A2	205 (9)
STAT6		transcription regulator		-0.232		3.56e-07	ADAP1,BCL2,CCL5,CD38,Chil3/Chil4,Clca3a1/Clca3a2,CLDN2,CLPS,CTNS,CTSS	367 (19)
FOXA2		transcription regulator		-0.291		1.03e-05	ABCC8,ADH1C,ALOX5,C3,CD55,CLCA1,DDC,EPHX1,FOXA3,HNF1A	110 (5)
NKX2-3		transcription regulator		-0.313		4.28e-08	ADAP1,ANGPTL4,ARHGDIB,BCHE,BMP4,CASP1,CAVIN2,CBS/CBSL,CD36,CD38
TWIST1		transcription regulator		-0.384		1.68e-09	ALDH1A1,AR,BCL2,C1QTNF1,C3,CCN4,CDKN2A,EGFL6,ESR1,ETS1	284 (17)
MYB	-1.021	transcription regulator		-0.883		7.6e-05	ANPEP,BANK1,BCL2,C3,CAMK2B,CBX4,CNN3,GSTM1,ITGA2B,LCN2	347 (23)
RUNX3		transcription regulator		-0.955		1.24e-05	AKAP6,CCN2,COMMD3-BMI1,CPVL,CRIM1,FGF9,IL18,LIFR,MID1,MSRB3
SMARCA5		transcription regulator		-1		7.05e-07	AHR,BST1,CASP1,GM2A,GPRC5B,GRIA3,HLA-A,IFITM2,KHDC1L,PHLDA3
SOX2		transcription regulator		-1.173		3.77e-07	ABTB2,AFAP1L2,AHR,ALDH1A1,ALOX5,ARHGEF10,ASCL2,BFSP2,BMP4,CCL5	290 (14)
IKZF1		transcription regulator		-1.225		5.44e-05	ACP1,C1QTNF1,CAV1,CD38,CD68,DNAJC6,DNM3,DOCK4,FGF13,IFI16	26 (2)
TRIM24		transcription regulator		-1.668		3.74e-07	Apol9a/Apol9b,CCL5,GBP4,HERC6,Ifi27l2a/Ifi27l2b,IFI44,IFIT1B,IFIT3,IRGM,ISG15	197 (14)
SIRT1		transcription regulator		-1.799		5.97e-10	ABCG1,APLN,BCL2,CAV1,CCL5,CD36,CDKN2A,CLCA1,ENTPD8,ESR1	258 (18)

## Sheet: Table 2
¬© 2000-2021 QIAGEN. All rights reserved.
Predicted Upstream Transcriptiona Regulator in AHRKO vs WT organoids in d4 ENR conditions
Upstream Regulator	Expr Log Ratio	Molecule Type	Predicted Activation State	Activation z-score	p-value of overlap	Target Molecules in Dataset	Mechanistic Network
YAP1		transcription regulator	Activated	4.622	2.8e-12	ADAMTS1,AMOTL2,ANKRD1,ANLN,BAX,BCL2L1,BCL2L11,BMP2,CAVIN2,CCDC80,Ccl2,CCN1,CCN2,CCNA2,CCNB1,CCND1,CCNF,CDC20,CDKN1B,CDX2,CPT1A,CPT2,CSF1,CSF2,CYP11A1,DTYMK,EDN1,EGR1,FLNA,FN1,FOS,FOXM1,GADD45A,GDF15,HMGCR,HMGCS1,HMGCS2,ICAM1,IGF1R,INHBA,ITGA5,KIF23,LDHA,LIFR,LMNB1,MAP1B,MC2R,MCM3,MYL9,NEGR1,NEK2,NLRC4,PDGFB,PLK1,POLA1,PPP1R3B,RAD51,RPL10A,RPL11,RPL12,RPL14,RPL27A,RPL3,RPL37,RPL4,RPL6,RPL8,Rplp1 (…	1117 (19)											Overlap with AHR CHIP targets
MYC		transcription regulator	Activated	4.324	2.45e-33	ABCA1,ABCA2,ABCB10,ABCB9,ABCC3,ABCD3,ABCG1,ACADM,ACOT12,ACTA1,ACTB,ACTN1,ACVR2A,ADAMTS1,AHR,AIMP2,AK2,AKAP12,ALDOA,ALOX5,ANXA6,AOPEP,APEX1,APP,AR,ARG1,ASCL2,ASS1,ATAD3A,ATP13A2,AXL,BAX,BBC3,BCL2,BCL2L1,BCL2L11,BCL6,BDNF,BMPER,BUB1,BZW2,C1QBP,CAD,Cald1,CASP1,CASP9,CAST,CCNA2,CCNB1,CCND1,CCND2,CCNG2,CD44,CDC20,CDC34,CDH2,CDK4,CDKN1B,CDKN2A,CDX2,CHP1,CHRNB1,CIDEC,CITED1,CLDN7,CLIC4,CLU,COL1A1,COL4A1…	1611 (21)											Predicted inhibite in KO DIFF	Predicted activated in KO DIFF
TRIM24	-0.249	transcription regulator	Activated	4.288	3.73e-12	Apol9a/Apol9b,Bst2,CCL5,CSRP1,CXCL10,DDX60,DHX58,FLRT3,GLUL,HERC6,Ifi27l2a/Ifi27l2b,IFI35,IFI44,Ifi47,IFIH1,IFIT1B,IFIT2,IFIT3,IL1R1,IRF1,IRF7,IRGM,ISG15,JAK2,LGALS3,Ly6a (includes others),MGMT,NMI,OAS1,OASL,PARP12,PHF11,PLAC8,PLEC,PRPS2,PSMB10,PSMB8,PSMB9,PTHLH,RTP4,SAMD9L,SERPINE1,SPP1,STAT2,TGFBI,Tgtp1/Tgtp2,TLR2,TP53,TRIM6-TRIM34,UBA7,VEGFA	1250 (21)											FOXO3	SOX9
CEBPB	0.587	transcription regulator	Activated	4.241	8.58e-08	ABCB1,ADH1C,Akr1b7,ALDH1A1,ALDH1A2,ANTXR1,AOC1,APOB,APP,ARG1,AURKA,BCL2,BCL2L1,BDNF,BGLAP,C3,Ccl2,CCL5,CCNA2,CCND1,CCND2,CCP110,CCR1,CCRL2,CD14,CD1D,CDC20,CDCA3,CDH3,CDK4,CDKN1B,CDO1,CEBPB,CHEK2,CHIT1,COL1A1,CP,CPT1A,CTPS1,CXCL10,CXCL2,CXCL3,CYP11A1,Cyp2d9 (includes others),DCTPP1,DGAT2,DHCR7,DUT,ENTPD2,FGFR2,FHL1,FN1,FOS,FOXO3,FTL,GADD45A,GLIPR2,HAS2,HELLS,HLA-A,HMGB2,HMMR,HSP90AA1,HSPD1,HSPE1,I…	1359 (22)											CDX2
NKX2-3		transcription regulator	Activated	3.875	4.07e-07	ADAP1,AIF1L,ANGPTL4,ANKRD37,ANLN,BATF2,BCHE,BMP2,BMP4,CASP1,CAVIN2,CD38,CRYAB,DDX60,DHX58,EDN1,FBXO6,FLRT2,GASK1B,GCH1,GDF15,GMPR,HELZ2,HES2,HLA-F,HMMR,HSD17B2,KLF4,LY6E,LYPD1,MAMDC2,MAP2,MEDAG,MMP7,NT5C3A,NT5DC2,PAPSS2,PARP12,PARP14,PARP9,PHGDH,PIM3,PKIA,PLD1,PLSCR1,PRSS12,PSAT1,PSMB8,PSMB9,RNF213,RPS23,RTP4,SAMD9L,SERPINE2,SHMT2,SHOX2,SLC40A1,STAT2,TAP2,TENT5A,TIPARP,TMEM158,TRIM5,UBA7,UBE2L6,V…												HNF1A
KLF6	-0.358	transcription regulator	Activated	3.659	0.00314	ALOX5,ARG1,BAK1,BCL2L1,BCL2L11,BCL6,Ccl2,CDH2,CDKN1B,COL1A1,CXCL2,HNF4A,IGF1R,KRT4,MMP9,MRC1,NCOA1,NR4A1,PCNA,PLAU,PPARG,TGFB1,TNF,VEGFA	1145 (18)											FOXO3	NKX2-3
MYCL	0.366	transcription regulator	Activated	3.624	0.089	Alyref,BCL2L11,CAD,CDC20,CDK4,CINP,HSPD1,P2RX5,PUS1,RPL10A,RPL11,RPL12,SLC25A4,SLC25A5,Snrpg,SNU13,TOMM20,UCK2,WDR75,YIPF1												HNF1A	SMAD3
SNAI1		transcription regulator	Activated	3.391	3.91e-07	ACTN1,ACTR3,AFAP1,ANKRD1,AXL,BAK1,BCL2L1,BGLAP,BMP4,CCN1,CCN2,CCND1,CCND2,CD55,CDH2,CDK4,CLDN4,CLDN7,COL1A1,ELF4,EPCAM,ESPN,ESRP1,FLNA,FLNB,FLNC,FN1,FOS,FST,GDF15,HNF4A,HPGD,ID4,IL23A,IL7,INHA,KRT8,L1CAM,LEF1,LIF,MMP14,MMP9,PFKP,RUNX2,SERPINE1,SLC28A3,TF,TGFB1,VASP,VDR,VILL,VIM,ZEB1	1371 (21)
CTNNB1		transcription regulator	Activated	3.36	1.8e-26	ABCB1,ABCD4,ACTB,ACTR3,ACVR2A,ADGRG2,ADSS2,AHR,AKAP13,ALDH1A1,ALDH1A2,ALDH3A2,AMIGO1,ANXA1,APP,AR,ARFGAP3,ARL4A,ASCL2,ATP6V0A1,AURKA,AXIN2,BBC3,BCL2,BCL2L1,BCL2L11,BDNF,BGLAP,BMP1,BMP2,BMP4,CA9,CASP7,Ccl7,CCN1,CCN2,CCNA2,CCND1,CCND2,CD44,Cd52,CDH2,CDKN1B,Cdkn1c,CDKN2A,CDX1,CDX2,CEACAM1,CHEK2,CIDEC,CLDN2,CLU,CNN2,CNTFR,COL1A1,COL4A1,COL4A2,COL4A5,COMMD3-BMI1,CPT1A,CPT2,CRAT,CRIP1,CRYBG1,CTSF,CXCL2…	1381 (21)
STAT6		transcription regulator	Activated	3.281	3.5e-18	Acot1,ACOX1,Acp5,ACTB,ADAM11,ADAP1,AHNAK,AKAP13,ANXA1,APOLD1,ARG1,ARID5A,ARNTL2,ASS1,BAX,BCL2,BCL2L1,BCL6,Bst2,CCDC86,Ccl2,CCL5,CCND2,Cd24a,CD38,CD40,CDKN1B,CIDEB,CIDEC,CISH,CKAP4,Clca3a1/Clca3a2,CLDN2,Cmah,COL1A1,CPT1A,CRIP1,CTSS,CTSW,CXCL10,CXCL2,CXCL3,DDHD1,DGKA,DHX58,DUOX2,EGR1,EHHADH,EPHX1,FADS1,FAM20B,FCER2,FCRL1,FKBP5,FLRT2,FSCN1,GADD45B,GATM,GNA15,GPM6B,GTSE1,H2-T22,HLA-DMB,HMGCR,HMGCS2,H…	1138 (19)
TCF4		transcription regulator	Activated	3.243	9.4e-08	ADA,ADAMTS9,AEN,ANGPTL4,ANXA6,APH1A,B4GALT1,BACH2,BAG2,BCL6,BEX3,BNIP3,BYSL,CASP1,CCL28,CCNA2,CD38,CD40,CD55,CDC20,CDCA3,CDKN2A,CKAP4,Clec2d (includes others),CREB3L2,DACH1,DSTN,DUT,EDEM1,ELF4,EPCAM,EXOSC1,FGD2,FKBP7,FMR1,FTSJ1,GEMIN5,GMPR,GRB14,H1-0,HMGB2,HMMR,HSPBP1,ID3,IFI16,IGFBP3,IGFBP4,IL15,IL7,INHBA,ITGB5,JAK2,KCNN4,LRP1,Ly6a (includes others),LY6D,MRTO4,MVP,NEK2,NOTCH1,NUF2,OPTN,PARP8,PDC…	682 (7)
SMAD1		transcription regulator	Activated	3.179	3.8e-05	BCL2L1,BTG2,CCN2,COL1A1,COL4A1,CSF1,CXCL2,CXCL3,GADD45B,HHEX,ICAM1,ID4,IRF1,PDGFA,PDGFB,RUNX2,SOX9,SPP1,VCAM1,VEGFA	1229 (23)
KDM3A		transcription regulator	Activated	2.977	4.8e-06	AR,CCN1,CCN2,CCND1,CHRNB1,CUL7,EDN1,ETS1,FLNC,FSTL3,GDF15,IL33,KLF5,LOXL2,MCAM,MMP9,PCNA,PLOD2,SERPINE1,TNC	469 (7)
FOXM1	0.761	transcription regulator	Activated	2.966	2.64e-08	ACE,ACE2,ANXA1,AR,AURKA,AXIN2,CCNA2,CCNB1,CCND1,CCND2,CCNF,CDC20,CDH2,CDKN1B,CDKN2A,CENPA,CKS1B,COMMD3-BMI1,FLT1,FN1,FOS,FOXM1,GLB1,GTSE1,HSD11B2,IL1RN,ITGA5,JUN,KIF20A,LDHA,LEF1,MMP7,MMP9,MUC5AC,NEK2,Nes,NUF2,PCNA,PDGFA,PGK1,PLK1,PRC1,PROM1,RELA,SFTPD,STMN1,TOP2A,TP53,VCAN,VEGFA,VIM,XRCC1,ZEB1	1344 (24)
MRTFA		transcription regulator	Activated	2.955	6.22e-07	ACTA1,ACTB,AMOTL2,ANKRD1,ANLN,BCL2L1,CAVIN2,CCL5,CCN1,CCN2,CDC42EP2,CDKN2A,CLDN15,CMA1,CNN2,COX7A1,CXCL6,CYBA,DSG1,EDN1,EGR1,EGR3,ETV6,EYA2,F2R,FADS2,FLNA,FOS,GADD45A,GSTM5,HLA-A,HPGD,ICAM1,ITGA5,ITGA6,LCN2,LTF,MAP2,MAPK13,MGST2,MMP9,MOGAT2,MYL9,P2RY1,PRSS57,RAC1,RAMP1,Saa3,SELENOP,SERINC3,SERPINE1,SORBS1,TGFB2,THBS1,TNC,Tpm2,Tpm4,TST,VCAM1	1371 (27)
TP53	0.525	transcription regulator	Activated	2.86	7.32e-43	AATF,ABCA1,ABCA2,ABCB1,ABCB6,ABCC2,ABCG2,ACAA2,ACACB,ACADM,ACE,ACER2,ACOT11,ACSF2,ACSL3,ACSS2,ACTB,ACTL6A,ACTN1,ADA,ADAM12,ADAM8,ADORA2B,ADRB2,AEN,AGTR1,AIRE,AK1,AK4,AKAP12,AKT3,ALDH1A1,ALDH1A2,ALDH1B1,ALDH4A1,ALDOA,ALOX5,AMOTL2,ANKH,ANKRD1,ANLN,ANTXR1,ANXA1,ANXA2,ANXA6,AP3B1,APEX1,APOBEC1,APP,AR,ARG1,ARHGAP5,ARRB1,ASS1,ASTN2,ATP1A1,ATXN1,AURKA,BAK1,BAX,BBC3,BCL2,BCL2L1,BCL2L11,BDNF,BGLAP,BICD2,B…	1311 (22)
ERG		transcription regulator	Activated	2.84	1.25e-08	ACOT8,ACTN1,ADGRG1,ADRB2,AR,ARHGAP24,ARHGAP28,AXIN2,CCNA2,CDH2,CDK5RAP2,CHRNB1,CHRNB2,CLIP1,COLGALT1,DAAM1,DBN1,DIP2A,DNMBP,DSTN,EPB41L3,ETS1,F2R,FHL1,FKBP5,FLNB,FLNC,FLT1,FMNL3,FOSB,HMMR,HPGD,ICAM1,IGF1R,ILK,IRS2,ITGA6,LAMA5,LEF1,MMP9,MYO1D,NDRG1,NLGN1,NPAS1,NR4A2,NUMB,PHACTR2,PLAT,PLAU,PLPP3,PSTPIP2,RALGPS2,RAPGEF1,RAPH1,RASA2,RBMS1,RHOJ,RPL27A,RSU1,SOX4,SOX9,SPP1,TACC1,TDRD5,THBS1,TMPRSS2,VIM,…	1234 (18)
TBX2		transcription regulator	Activated	2.804	0.00146	ANLN,AURKA,BUB1,CCNA2,CCNB1,CDCA3,CDKN2A,CKAP2,CKS1B,ELK3,FOXM1,HELLS,MCM2,MCM4,MCM5,MCM7,NCAPD2,PKMYT1,PLK1,PRC1,PRDM5,RBL1,SMC2,TGFB2	1078 (16)
IRF8		transcription regulator	Activated	2.732	0.00334	ARID5B,ASAH1,BANK1,BAX,BCL2L1,BCL6,CBL,CCL5,CD14,CD37,CD40,CTSS,EGR1,ETV3,ETV6,FOS,ICAM1,ID3,IFIT1B,IFIT2,IFIT3,IL15,IL18,ISG15,KLF4,KLF6,LIF,MAF,MAP4K4,MDM2,MMP9,MS4A1,OAS1,Pmaip1,STAT2,TNF,TNFSF13B,TP53	1122 (19)
RUNX1		transcription regulator	Activated	2.709	0.000105	ADGRG1,ANXA2,APEX1,BAX,BBC3,BCL2L11,BDH1,BGLAP,BTG2,CCND1,CDKN1B,Cdkn1c,CDKN2A,CSF1,CSF2,CYP11A1,DEPTOR,EDEM1,EP300,FSCN1,GNA15,GNL3,GPAM,GPATCH4,HAPLN1,IFIT1B,IGF2R,IGFBP3,IHH,IPO4,IRF7,ISG15,KIT,KRT80,LMO1,LMO4,Ly6a (includes others),MECOM,Mt1,MYBBP1A,MYL9,NOC4L,NOP2,NR2F2,OAS3,Oasl2,PARP1,Pmaip1,POU6F1,PPAN,RORC,RRP15,RRP9,RUNX2,SERPINE1,SGPP1,SHANK2,SLC22A4,SOX6,SOX9,Sp100,SPP1,Tcf7,TNFRSF18,…	1257 (22)
NOTCH1	0.797	transcription regulator	Activated	2.692	0.000485	ANKRD1,BCL2,BCL2L1,BCL6,BGLAP,BMP2,CAD,CCN1,CCN2,CCND1,CCND2,CD14,CD44,CDKN1B,Cdkn1c,CEBPB,COL1A1,DLL1,ECHS1,ECT2,ERBB2,ERBB3,FLT1,FOS,FOSB,HSP90AB1,HSPE1,HSPH1,ICAM1,IFI16,IGF1R,IGFBP3,IGFBP4,IL18,IL23A,IRF1,ITGA6,Ivl,KRT8,LEF1,LFNG,Ly6a (includes others),MCAM,MUC5AC,MYCL,NOTCH1,NOTCH3,NR2F2,PDGFB,PDGFRB,PPARG,RB1,RELA,RGS5,RORC,RUNX2,S100A1,SDHA,SERPINE1,SLC5A5,SOX9,SPP1,TGFB1,TGFB2,TGFB3,TNF,T…	930 (13)
GLI2		transcription regulator	Activated	2.649	0.0019	BCL2,BCL2L1,BMP4,BNC1,CCL5,CCND1,CCND2,CCR1,CDKN1B,CLEC7A,CLU,CSTA,CXCL10,CXCL2,CXCL3,CXCL6,FOXA2,HK2,HSD11B2,IL15,JAG2,MMP9,NTN1,PTHLH,RUNX2,SMO,SOX9,SPP1,TNF,VDR,VIM	1368 (25)
SNAI2		transcription regulator	Activated	2.64	0.000303	ANKRD1,AR,AXL,BBC3,BCL2L11,BGLAP,CCN1,CCN2,CCND1,CDH2,COL1A1,DSP,EPCAM,FN1,HPGD,ID4,L1CAM,MMP14,MMP9,RUNX2,SOX9,VDR,VIM	963 (24)
SOX7		transcription regulator	Activated	2.559	0.00311	ADGRG1,COL4A1,COL4A2,EFNA1,EVPL,FGF3,FLT1,FLT4,HSPG2,KRT27,MFGE8,MMP14,NOTCH4,OVOL1,PLAU,PRKCA,SOX4,SPRR1A,Sprr2h,TGFBI,VCAN
SMAD3		transcription regulator	Activated	2.553	1.33e-08	ABI2,ADAM12,ANKRD1,APOB,ARHGAP24,ARHGAP27,ARID3A,AXIN2,BCL2,BCL2L11,BGLAP,BMP2,BMP6,C3,Ccl2,CCN2,CCND1,CCND2,CCNG2,CDH2,CDK4,CDKN2A,CES1,CKS1B,COL1A1,CXCL10,CXCL3,CYP11A1,CYP51A1,DEPTOR,DOCK4,EDN1,EGR1,EREG,FDFT1,FN1,FOS,FOXO3,FST,FSTL3,GADD45B,HAS2,HHEX,HNF4A,ID3,IL15,IL23A,INHA,ITGB5,JUN,LGALS9B,LPAR1,Ly6a (includes others),MAX,MBOAT2,MMP9,MXD1,NET1,PABPC4,PCNA,PDGFB,POR,PTHLH,PTP4A3,RAC1,RPS6,…	1462 (19)
SOX9	0.885	transcription regulator	Activated	2.537	1.99e-05	ADAMTS1,AR,CCN2,CDH2,CDK4,CDX2,CELSR2,COL1A1,COMMD3-BMI1,CREB3L2,DMBT1,FGFBP1,FOS,FZD2,FZD9,GAS7,GUCA2A,HAPLN1,IHH,ITGB8,KIT,LBP,LRP6,MAPK3,MSRB3,PAQR6,PPARG,PRKCA,RUNX2,SDK2,SOX4,SOX9,SULF2,TCF7L2,TIMP2,VEGFA	1466 (23)
JUN	0.473	transcription regulator	Activated	2.461	2.33e-17	ABCB1,AKAP12,AKT3,ALAS1,ALPP,ANGPTL2,ANKRD1,ANXA1,ANXA2,APEX1,APP,AR,ARG1,ARNTL2,AXL,BAK1,BAX,BBC3,BCL2L11,BDNF,BGLAP,C3,Ccl2,Ccl7,CCN1,CCN2,CCNA2,CCND1,CCND2,CD14,CD44,CDC20,CDKN1B,CDKN2A,CHL1,CHST4,Clca3a1/Clca3a2,CLDN2,CLU,COL1A1,Crip2,CSF1,CSF2,CSTA,CXCL10,CXCL3,CYCS,CYP11A1,CYP1B1,CYP2J2,EDN1,EEF2,EPHX2,ERBB2,EREG,EVX1,F3,FLNC,FN1,FOS,FOXA2,FOXO3,FTH1,GADD45A,GCLC,GJA1,GPT,GREB1,GSTA5,GSTP1,…	1521 (20)
PAX1		transcription regulator	Activated	2.449	1	EVPL,KRT27,OVOL1,SOX9,SPRR1A,Sprr2h
MYBL2		transcription regulator	Activated	2.425	0.0144	AURKA,BCL2,BCL2L11,BUB1,CCNA2,CCNB1,CCND1,CCNG2,CDKN2A,CLU,FOXM1,PLK1,SLC1A5,TOP2A,UBE2C
SP110		transcription regulator	Activated	2.424	0.00014	ACP1,ARRB1,BMP4,CCN1,CLU,CXCL10,DMD,EGR3,ETS1,F2R,F3,Gm4340 (includes others),GNA13,HDAC2,IFIH1,IFIT1,IFIT3,IL18,IL1R1,ITCH,MAOA,NR1I2,OAS1,OAS3,P2RX7,PDGFC,PLK1,PLSCR1,POLE,PPARG,PRKCA,RAC1,RXRA,SOX4,SP3,STIM1,TCF3,TNFRSF21,TRIM28,TRIM5,TXNIP,Usp17la (includes others)
MRTFB		transcription regulator	Activated	2.408	3.95e-06	ACTA1,ACTB,ADAMTS1,AMOTL2,ANKRD1,ANLN,ARID5B,BCL2L1,CAVIN2,CCL5,CCN1,CCN2,CLDN15,CMA1,CNN2,CXCL6,CYBA,EDN1,EGR1,EGR3,ETV6,EYA2,F2R,FADS2,FLNA,GADD45A,GSTM5,HLA-A,HPGD,INHBA,ITGA5,ITGA6,LCN2,LTF,MAP2,MAPK13,MGST2,MOGAT2,MYL9,NUAK1,P2RY1,PRSS57,RAMP1,Saa3,SELENOP,SERINC3,SERPINE1,SLFN5,SORBS1,TGFB2,THBS1,Tpm4,TST	932 (13)
TSHZ3		transcription regulator	Activated	2.401	0.223	CRYM,CXXC5,ECHDC2,FOSB,IGFBP3,KLHL1,NR4A1,PODN,RAMP3,TRMT61A,TXNIP,ZNF616
NOTCH4	0.893	transcription regulator	Activated	2.383	0.311	CDKN1B,Cdkn1c,FLT4,NOTCH1,RGS5,SERPINE1
IRF6		transcription regulator	Activated	2.376	0.0248	ARG1,CD14,CDH2,ENPP2,IL18,IL23A,KLF4,LCN2,MRC1,NR4A2,OVOL1,P2RX4,PLAU,PPARG,PPARGC1B
PRDM16		transcription regulator	Activated	2.352	0.0137	CCL5,CXCL10,FOXJ1,IFI44,IFIT1B,IFIT2,IRF7,OAS2,OAS3,PPRC1,SERPINE1,STAT2
PKNOX2		transcription regulator	Activated	2.345	0.00343	BBC3,BTG2,EGR1,GADD45A,MDM4,PIDD1,RPRM,TP53,VIM
STAT3		transcription regulator	Activated	2.329	6.42e-11	AGRP,AHR,ALDH1A1,AMER1,ANGPTL4,APEX1,ARG1,ARNTL2,BAK1,BCL2,BCL2L1,BCL2L11,BCL6,BCL9L,BNIP3L,CA9,CASP1,CASP7,Ccl2,CCL5,CCN2,CCNB1,CCND1,CCND2,CCR1,CCRL2,CD40,CD44,CDH2,CDKN1B,CDKN2A,CDON,CEACAM1,CEBPB,CLIC5,COL1A1,CSF2,CTF1,CXCL10,CXCL2,CXCL3,CXCL6,DLL1,DMBT1,DNM2,DNMT3B,DTX3,ECT2,EDN1,EGR1,EGR3,ENPP2,ERBB2,ETV3,F3,FGL2,FLRT3,FLT1,FN1,FOS,FOXA3,FSCN1,FST,GADD45A,GJA1,GLIPR1,HAS2,HERC6,HK2,HLA-A,HN…	1149 (20)
ZEB1	1.745	transcription regulator	Activated	2.303	1.55e-05	ALDH1A1,ANKRD1,CCN1,CCN2,CCNG2,CDKN2A,COL1A1,COMMD3-BMI1,EDN1,ESRP1,FN1,KIT,KRT19,LOXL2,MAL2,MAP1B,MMP9,MRC1,NRP1,NRP2,OAS1,PLAU,PTPRZ1,RBM47,RELA,S100A10,SERPINE1,TF,TGFBI,THBS1,VIM,XDH,ZEB1	1292 (17)
E2F1		transcription regulator	Activated	2.302	7.01e-12	ABCB1,ABCG2,ACTR3,ADIPOR2,AR,AURKA,BAK1,BAX,BBC3,BCL2,BCL2L1,BCL2L11,BGLAP,BID,BMP4,BNIP3,Calm1 (includes others),CASP7,CASP9,CBX7,CCNA2,CCNB1,CCND1,CCND2,CCNF,CD44,CDC20,CDCA4,CDK4,CDKN1B,CDKN2A,CHEK2,CITED2,CRYAB,DBF4,DDAH2,DDX39B,DUT,E2F2,ECT2,EGR1,EYA2,FBXO5,FEN1,FGFR2,FHL1,FKBP3,FLT1,FOS,FOXM1,FOXO3,GABARAP,Gcg,GM2A,GRAMD4,GRAP,HELLS,HMGB2,HMGN1,HSD11B2,HSPD1,HSPE1,ICAM1,ID3,ILK,IRS1,IRS2,JA…	1048 (17)
FLI1		transcription regulator	Activated	2.295	0.00266	ADGRG1,AIRE,Ccl2,CCL5,CCN2,CCND1,COL1A1,CXCL10,EGR1,FOXO3,LDHA,MDM2,NEU1,NOL6,Nolc1,NPM1,RACK1,SNU13,TNC,VEGFA	1296 (20)
ETV5	0.764	transcription regulator	Activated	2.283	7.94e-10	AHNAK,AKAP5,BAX,CAVIN2,CCND1,CDH2,CLDN4,CLDN7,CLIC5,EGFL6,ETV5,FN1,FOXM1,FXYD5,GALNT3,HOPX,ICAM1,ITGA5,KRT19,KRT80,LCN2,LGALS3,LMO7,LYZ,MAF,Mcpt2,MID1IP1,MMP14,MSN,MUC5AC,PKP2,PKP3,PKP4,PMP22,QKI,RET,S100A14,S100A6,SPP1,TIMP3,VEGFA,WWTR1,ZEB1	980 (13)
SMAD2		transcription regulator	Activated	2.274	0.000971	ADAM12,BCL2L11,BGLAP,CCN2,CCNG2,CDH2,CDKN2A,CDX2,CES1,CKS1B,CYP51A1,FDFT1,FLT1,FN1,FSTL3,GADD45B,HAS2,HHEX,MMP9,NET1,PDGFB,PTHLH,RAC1,RUNX2,SERPINE1,SPHK1,THBS1,TIMP3,VEGFA,VIM,XIAP	1249 (17)
WWTR1	0.484	transcription regulator	Activated	2.261	8.32e-09	ANGPTL4,BGLAP,BMP2,CCN1,CCN2,CCNA2,CD44,COL1A1,CXCL2,CXCL3,CYP11A1,DTYMK,EMP1,FN1,GJA1,ICAM1,ITGB8,LAMA3,LAMA5,MC2R,NEGR1,RRM1,RRM2,RUNX2,SERPINE1,SH3BP1,SPP1,SYNPO,TYMS,VCAM1	1053 (21)
FOXL2		transcription regulator	Activated	2.257	0.0144	BID,BMP2,CDKN2A,CPM,CXCL2,CXCL3,CXCL6,ETV6,FOS,FST,GPRC5B,ICAM1,IER3,INHBA,LIF,MYO6,NR5A2,PTHLH,RGS2,SERPINE2,SOX4,SOX9,SPRY1
ATF2		transcription regulator	Activated	2.241	0.00302	ACTB,ANGPTL2,BCL2,BCL2L1,CCNA2,CCND1,CDKN2A,DMBT1,DUSP8,EGR1,FN1,FOS,GADD45A,IL23A,ITGB8,JUN,NOTCH1,PCK1,PGLYRP2,PLAU,PPARG,PSEN1,RELA,TF,TGFB2,TNF,VCAM1	1196 (16)
NDN		transcription regulator	Activated	2.236	0.124	CDKN2A,NUCB2,PPARG,RBL1,WNT10A
CCND1	0.439	transcription regulator	Activated	2.228	1.5e-11	AFAP1,AHNAK,AR,ARMCX1,ASAP2,AURKA,BCL2,Bmyc,CCDC32,CCNA2,CCND1,CCND2,CD44,CDCA7L,CDK4,CDKN1B,CDKN2A,CLIC6,COL1A1,DDIAS,DKK2,DTL,ENDOD1,ENO1,ENPP2,EPS8,ERBB2,ERBIN,EREG,FLNA,FOXM1,GJB1,GPRC5A,GPRIN2,HERC3,HOMER2,HSPB1,ID3,IER3,ITGB6,KIF20A,KLHL24,Klra2,KRT4,LAMB2,LCORL,MAML3,MCM4,MCM7,MORC4,MYBL1,MYO7A,NCAPH,NCOA3,NOP2,NOP58,NOTCH1,NT5E,PCNA,PCYT1A,PCYT1B,PDCD4,PDLIM4,PKP4,PLK1,PPARG,PPCS,PSMC3IP,…	1035 (18)
FOXF1		transcription regulator	Activated	2.213	0.357	CCND1,CDK4,CDKN1B,ITGA5,VCAM1
REL		transcription regulator	Activated	2.201	3.37e-06	ACSS2,AGA,AHR,ANLN,APP,ARFGAP3,ATXN1,BACH2,BBC3,BCL2,BCL2L1,CAMK2D,CCND1,CCND2,CD40,CMPK1,COTL1,CSF2,CXCL10,CXCL3,DDX18,DNASE1L1,DUT,EDARADD,ETV5,EXOSC1,F3,FADS2,FCER2,FN1,FOS,FOXO3,GADD45B,HLA-A,ICAM1,IER3,IFIT1B,IFT74,IL18,IL23A,JUN,KAT6A,KCNK6,MAP3K8,MMP9,NAB2,NR4A1,NRARP,PARP14,PHGDH,PIPOX,PLAAT3,PLK2,PPP1R14B,PYCARD,RBL1,RDH10,RELA,RORC,SLC25A27,SLC7A6,SORBS1,TNF,TNFRSF10A,Tnfrsf22/Tnfrsf23,…	858 (15)
NRIP1		transcription regulator	Activated	2.183	0.0331	ACAA2,ACACB,CCND1,CCNG2,CDKN2A,COX7A1,GYS2,HADHB,HAS2,LDHB,PDK2,PDK4,PPP1R3B,PYGL,SLC25A20,SUOX,TNF
ZBED2		transcription regulator	Activated	2.169	0.0101	ADAR,HLA-A,IRF7,OAS3,STAT2
OTX2		transcription regulator	Activated	2.111	0.316	BMP4,COL8A1,EFNA2,EFNA5,ENPP2,FLVCR2,POMC,PTPRZ1,PYCR2,RDH10,STRA6,TF,TNC
FOXC2		transcription regulator	Activated	2.089	0.000826	ADRB2,BAX,CASP9,CDH2,CDKN1B,DLL1,FN1,IRS1,IRS2,ITGB5,LEF1,LFNG,MMP9,NOTCH1,PDGFRB,PPARG,RUNX2,SLC2A4,TP53,VIM,ZEB1	1336 (21)
HMGB1		transcription regulator	Activated	2.058	0.298	BAX,CD40,CDKN2A,CXCL2,CXCL3,CXCL6,GLUL,ICAM1,IFIT1,IL1R1,MDM2,MERTK,MMP9,MRC1,TLR2,TNF,VCAM1
ETS1	1.911	transcription regulator	Activated	2.055	0.00624	ABCB1,ARL4C,ATP2A3,BAX,BCL11A,BCL2L1,BMP4,CASP1,Ccl2,CCL5,CCN2,CCND1,CD14,CD44,CDKN2A,CHUK,CITED2,CSF2,EGR1,ERBB2,ETS1,FLT1,FN1,FOXD1,HPGD,HS2ST1,HSPE1,ICAM1,IKZF2,INSIG1,ITGB6,KRT8,LTB,MCAM,MDM2,MMP7,MMP9,MUC5AC,NQO1,PARP1,PLAU,PSEN1,PTHLH,RHOBTB3,RUNX2,Serpinb9b,SERPINE1,SPP1,TGFB2,TNF,TP53,TYMS,VEGFA,ZEB1	1194 (21)
GATA6		transcription regulator	Activated	2.045	0.0316	ABCB1,ARG1,ASPA,ATP6V0A1,ATP6V0A2,ATP6V0D1,BCAM,BMP4,BRAF,Cald1,CALML4,CDX2,CITED1,COL4A1,COL4A2,CRYL1,CYP11A1,DCBLD2,EDN1,EVPL,FOXA2,FOXA3,GPI,HNF4A,HSD3B1,HYAL1,KRT27,LAMB2,LDHB,LGR5,MC2R,MRC1,NDUFA1,NR5A2,OVOL1,PGK1,PGM2,PPARG,PTGS1,Saa3,SLC9A3,SORBS3,SPRR1A,Sprr2h,TGFB1,TGFB2,WNT7B
IFI16	1.293	transcription regulator	Activated	2.043	0.000184	BAX,CCL5,CCND1,CD81,CDKN1B,CDKN2A,CXCL10,E2F2,EDN1,GADD45A,HSD3B1,ICAM1,IFI16,IL1RN,ISG15,LDLR,MAP2K1,MDM2,MGST1,MIF,OAS1,PCNA,SFTPD,STAT2,TNF,VCAM1,XRCC1	1190 (18)
MLXIPL		transcription regulator	Activated	2.039	6.47e-07	ACACB,ACSS2,ADIPOR2,ANXA2,Ccl2,CIDEC,CPT1A,DHRS7B,ELOVL6,GPAM,GPAT3,HMGCR,HMGCS2,MID1IP1,MRC1,PCK1,PGD,PKLR,PNPLA3,PPARG,PYGL,RGS16,RPL10A,RPL11,RPL12,RPL14,RPL27A,RPL3,RPL37,RPL4,RPL6,RPL8,Rplp1 (includes others),RPLP2,RPS10,RPS12,RPS16,RPS18,RPS19,RPS2,RPS21,RPS23,RPS28,RPS3,RPS6,RPS8,RPS9,RPSA,SLC2A4,TXNIP	1114 (13)
PAX8	-1.363	transcription regulator	Activated	2.038	0.102	BCL2,CCNA2,DIO1,GSTA5,HR,L1CAM,LRRN1,MCM3,POMC,SLC5A5
HTT	-0.31	transcription regulator	Activated	2.012	8.12e-12	ABCA1,ABCC10,ACADM,ACTA1,ADAMTS4,ADORA2A,AKAP12,ALDOA,ALDOC,AP1S1,APP,ATL2,ATP1A1,ATP6V0E2,ATP8A1,AZIN1,B3GNT2,BASP1,BBC3,BCL2,BCL2L11,BCL6,BDNF,BID,BMP1,BMP3,CA12,CA4,CALML4,CAMK2B,CAMK4,CASP1,CAST,CBR1,CCL5,CCN2,CCND1,Cd24a,CDHR5,CEBPB,CEPT1,CHRNB2,CHUK,CITED2,CLCN1,CLIC6,COL16A1,COL18A1,COL4A1,COL4A2,COX6B2,CRYAB,CSNK1E,CYCS,CYP51A1,DHCR7,DLG3,DLL1,EEF1A1,EEF2,EGR1,ENO3,ENPP2,EP300,EPB41L3,EVL…	1422 (20)
VDR	-1.627	transcription regulator		1.986	1.35e-10	ABCB11,ABCC3,ACE,ACOX1,AGTR1,ANLN,ARHGEF3,BAX,BCL2,BCL2L1,BGLAP,CASP9,Ccl2,CCNB1,CCND1,CCND2,CD14,CD44,CDC20,CEBPB,CENPA,CISH,Clec2d (includes others),CLIP1,COL1A1,COL4A1,COL4A2,CPT2,CSF1,CSF2,CUBN,CXCL10,CYP2C9,DCTPP1,Defb1,DSG1,EDN1,EGR1,F3,FEN1,GADD45A,HK2,ICAM1,IER3,IGFBP3,IL18,IL1RN,INCENP,ISG15,JUN,KEAP1,KSR2,LBH,LDLR,LGALS1,NCAPD2,NDC1,NGF,NR1H4,PDLIM2,PLD1,PPARG,PRC1,PYY,RAC1,RAPGEF1,RB1,…	890 (17)
LYL1		transcription regulator		1.982	0.0237	ADGRG1,BCL2L1,BTG2,EGR1,ID3,ID4,RAPGEF1
TAL1		transcription regulator		1.978	0.0306	AATF,ACOT8,Acp5,ADCY3,ADGRG1,Aldh1a7,ARVCF,BCL2,BCL6,BUB1,C3,CCNB1,CCNG2,CCR9,CDKN2A,CHST11,CMA1,DNMBP,DSG2,ETS1,FCRL1,GALNT7,GSDMD,HELLS,HLA-A,HLA-E,HLA-F,HSD17B14,ICAM1,JUN,KIF20A,KIT,LCORL,LMO1,LRBA,LYST,MAP2,MCM2,MCM4,MFSD13A,N4BP2L1,NOTCH1,P2RY1,PLEKHO1,PMS2,PRSS8,RELA,SOX4,SYK,TUBB4B
HMGA1		transcription regulator		1.975	0.000771	ARL4A,B3GALT5,CCN1,CCND1,CCND2,CD44,CEP19,CITED1,COL1A1,COL4A1,COL4A2,CPE,CRYAB,CTSH,DHCR7,DRAM2,EGR1,EPB41L4A,FOS,GNA15,GRAMD2B,HMGCR,ID3,IER3,IGFBP3,IGFBP4,IGFBP7,IL15,INSIG1,IPMK,KIT,LAMB1,Ly6a (includes others),LY6E,MMP9,MSRB3,PPARG,PYCR2,SEC24D,SLC26A2,SOX4,SYK,SYPL1,TFAP2C,TRIM28,VIM,WDFY1,ZFP57,ZYX	1421 (25)
SIX5	0.828	transcription regulator		1.961	1	ATP1A1,DMPK,SFRP2,SIX4
PHF1		transcription regulator		1.96	0.467	BAX,BBC3,HOXD8,MDM2,TP53
BCL10		transcription regulator		1.956	0.124	CCL5,CD44,CSF2,CXCL2,TNF
SPIB		transcription regulator		1.937	0.08	ARHGAP6,ARMC3,BMP6,Bst2,CCR9,DLL1,EGR1,EPCAM,GNA15,IL18,IL23A,KIT,KLF6,LGR5,MBD2,NAV2,NET1,P2RY6,PRDX4,PRDX5,RAD51,SLAMF9,TNFRSF11B
ZMIZ2		transcription regulator		1.929	0.00371	AXIN2,CCND1,CD44,JUN
DMTF1		transcription regulator		1.91	0.0194	BBC3,CDKN2A,MDM2,TP53
SMAD4		transcription regulator		1.905	2.19e-09	ANGPTL4,APOB,BBC3,BGLAP,BMP2,BMP4,CAB39,Ccl2,CCN2,CCND1,CCND2,CCNG2,CDH2,CDH3,CDK17,CDKN1B,CDKN2A,CITED2,CLDN7,CSF1,CXCL2,CXCL3,CXCL6,DNAH2,DOCK4,EDN1,EIF4EBP1,EPB41L5,ERBB2,ERCC5,EREG,ETV6,FAP,FN1,FOS,FSCN1,FST,FSTL3,GADD45A,GADD45B,GCNT1,GJA1,HAS2,HHEX,HNF4A,HSD3B1,ICAM1,IER3,IHH,IL18,INHBA,IRAK3,ITGA6,ITGB5,JAG2,KLF15,LEF1,LPAR1,MDM2,Msx3,NAMPT,NOTCH3,OVOL1,PAK3,PDGFB,PDGFRB,PLAU,POR,PTHLH,RAC…	1473 (20)
TEAD2	1.179	transcription regulator		1.89	0.0439	ARID5B,CCN1,CCN2,CCND1,CCNF,EDN1,NUAK1,POLA1,RAD51,SLFN5,THBS1,TNNT2,TP53,UHRF1
MTA1	0.413	transcription regulator		1.881	0.0946	ACKR3,ADRB2,APEX1,BCL2L1,CCND1,CCND2,CDKN2A,EMP1,HUNK,MMP9,SERPINB1,TNF
SMAD6		transcription regulator		1.842	0.00412	DNMT3B,PCK1,PROM1,SERPINE1,SOX9,SPP1,TGFB1,TGFB3	1280 (18)
NFKB1		transcription regulator		1.833	1.51e-06	ABCB1,ANKRD1,APP,AR,ARG1,ARNTL2,BAX,BCL2,BCL2L1,BMP2,BTG2,Ccl2,CCL5,CCN1,CCN2,CCND1,CCND2,CD40,CD44,COL1A1,CSF1,CSF2,CXCL10,CXCL2,CXCL3,EGR1,ELF3,ENPP2,FCGRT,FN1,FOS,FOSB,FSCN1,GADD45A,GJA1,HAS2,HLA-DMB,HOOK2,ICAM1,IER3,IFI16,IFIT1B,IGFBP3,IL18,IL1RN,IL23A,IRF1,ISG15,ITPR1,LAMB3,LGALS1,LTB,LTC4S,MAP3K8,MDM2,MMP7,MMP9,MUC5AC,NAMPT,NMI,NR4A1,NR4A2,PDGFA,PLAU,PLK3,PRKCD,RACK1,RELA,Saa3,SLC25A4,SOX9,…	1248 (12)
Foxp1		transcription regulator		1.818	0.118	BCL2L1,CDS1,E2F2,HCN1,HOPX,MTCL1,PCK1,PIK3IP1,SOX4,SPHKAP
KLF3		transcription regulator		1.812	0.00135	ABHD14B,Acot1,ACOT11,ADPGK,AHNAK,ALDH3B1,ANXA6,ARHGEF3,ARID5A,ATP2A3,BCL2,CAMK2D,CAPG,CCL28,CD1D,CD55,CD99L2,CEACAM16,CSF2,CXCL2,CXCL3,DHRS7,E2F2,ELP1,EXTL1,FCER2,FCGRT,FMNL3,FOS,GAD1,GCNT1,GLIPR2,GSTK1,GSTP1,IL15,IL18,IL1RN,IL23A,IL7,INTS4,ITFG2,JAK2,KCNK6,KCTD14,LENG9,LIN54,LTK,MAGED1,MAK16,MAN2A2,MAP1S,MGST2,MICU2,MIF,MSN,MYADM,NDRG1,PATJ,PDLIM2,PFKP,PIK3IP1,PLPP2,PSEN1,PTPN14,RAP1GAP2,RAP2C,R…
FOXO1		transcription regulator		1.792	1.2e-09	AGRP,ALAS1,ANGPTL4,ANLN,AQP9,AR,ATP6V0A1,BACH2,BANK1,BAX,BCL2,BCL2L11,BCL6,BGLAP,BID,BNIP3,CAMK4,CASP14,CCN2,CCNA2,CCNB1,CCND1,CCNF,CCNG2,CD40,CDKN1B,Cdkn1c,CDKN2A,CDKN2AIPNL,CITED2,COL1A1,COL4A1,COL4A2,CPT1A,CPT2,CXCL10,CYCS,EDN1,EGR1,EIF4EBP1,ELOVL6,FABP2,FBXO21,FLNB,FLT4,FN1,FOS,FOSB,FOXA2,FOXM1,FOXP4,FST,GABARAPL1,GADD45A,GADD45B,GPAM,GPI,GSTK1,HMGCR,HSP90AB1,HSPD1,ICAM1,IER3,IGF1R,IGFBP7,IKZ…	1071 (17)
PRDM1		transcription regulator		1.742	0.035	1810065E05Rik,ACOX2,ADA,ADAM8,ADGRG1,ANGPTL4,AXIN2,BCL11A,BCL2L11,BCL6,Bhlhe41,CA9,CADPS2,CASZ1,Ccl2,CD44,CPA4,CXCL2,CXCL3,CXCL6,Cyp2d9 (includes others),FAM167A,FCER2,FOS,FTH1,FZD2,GAD1,GPAT3,GSTA5,HHEX,ID3,IGF1R,IL18RAP,IRF7,ITPR1,LGALS1,LRRN1,MAF,MALL,MAP7D2,METTL7A,MTMR11,MYO1A,NFAT5,NPAS1,PLAC8,PSMB10,PSMB8,RAPGEF3,RGS16,SLC16A5,SLC25A37,SMPDL3B,SPRY1,TNF,TNFSF13B
E2F3		transcription regulator		1.701	0.000204	BAIAP2L1,CA12,CASP7,CCNA2,CCNB1,CCND1,CDCA3,CDCA4,CDKN2A,COL18A1,CTNND1,E2F2,ECHDC2,EDN1,ELF3,FBXO5,FGFR2,FOXN1,FST,HMGB2,HSPD1,ID3,INHBA,KRAS,KRT80,MAL2,MCM2,MCM3,MCM4,MCM5,MCM7,ORC1,PCNA,PLCB4,PLK1,POLA1,RAD51,RALGPS2,RB1,RBL1,RBPMS,RRM1,RRM2,SERPINE1,TENT5A,THBS1,TIMP3,TOPBP1,UBE2C,WFDC2	1172 (19)
MYB		transcription regulator		1.69	0.000204	ADA,ADAM12,ATP2B1,AURKA,AXIN2,BANK1,BAX,BCL2,BCL2L1,C15orf48,C3,CAMK2B,Ccl2,CCNB1,CCND1,CD14,CDH2,CNN3,COL4A1,CXCL2,CXCL6,ERBIN,FN1,FOXJ1,FOXM1,GRAP,GSTM1,HERC3,ICAM1,IGF1R,IGFBP3,IL18R1,ITPR1,JAK2,JUN,KIT,KLF4,LCN2,LIF,METTL7B,NOTCH1,PCNA,POLA1,RBL1,SLC1A5,Slfn2,SPHK1,SPP1,VIM,Zfp532	1143 (19)
LEF1	2.49	transcription regulator		1.688	4e-05	ABCG2,AHCYL2,AR,ATP6V0A1,AXIN2,BCL2,BGLAP,C3orf70,CASP7,CASP9,CCDC80,CCND1,CD1D,CD44,CDKN2A,CDX1,CPE,Dst,EPHX1,FN1,FRMD6,Gcg,HAS2,IGF1R,ITGB8,KRT31,LEF1,LYSMD2,MMP7,MXD1,Naip1 (includes others),NCOA7,NRN1,NTN4,PLCB4,RUNX2,SH3RF1,SLC35D1,SOX9,SP5,SPP1,SPRY1,STX11,TIAM1,TMEM158,TP53,VIM,ZC3H12D	1341 (26)
NFAT5	-0.302	transcription regulator		1.672	3.57e-06	AR,C1QTNF1,Ccl2,CCR1,CCR3,CHEK2,COL1A1,CSF2,CXCL10,CXCL3,EDN1,EREG,F3,HLA-DMB,HSPA2,IFI16,IFIT1B,IFIT2,IFIT3,IGFBP7,IL18R1,IL1RN,IL23A,IRF1,IRGM,LCN2,LIF,Ly6a (includes others),NOX4,Oas1d (includes others),PFKP,PLAT,PTGS1,RRM2,SEMA4C,SLC6A6,SPP1,TLR2,TNF,TNFRSF11B,TNFRSF21,VCAM1,VEGFA	792 (21)
MSX2		transcription regulator		1.669	0.00098	ABCG2,BGLAP,BMP4,CCND1,CDH2,FOXN1,GJA1,IHH,KRT84,LEF1,PPARG,SPP1,TGFB2,TGFB3,VIM,WNT7B	1116 (23)
EGR1	0.605	transcription regulator		1.64	9.39e-11	ABCB1,ACE,APP,AR,BAX,BCL2L11,CACNA2D4,CASP7,CASP9,Ccl2,Ccl7,CCND1,CCND2,CCR1,CD44,CDC20,Cdkn1c,CHGB,CLU,COL1A1,CSF1,CXCL2,CXCL3,CXCL6,EGR1,EIF4EBP1,EREG,F3,FLT1,FN1,FTL,GAD1,GADD45A,GADD45B,GALNT3,GDF15,HMGCR,HPGD,ICAM1,IGF1R,JUN,LDLR,LYZ,MMP14,MMP9,MXD1,MYBL1,NAB2,NDRG1,NR4A1,PDGFA,PDGFC,PDX1,PLAU,PPARG,RB1,RRAD,SERPINE1,SLC12A2,SPP1,SQLE,STIM1,TGFB1,THBS1,TIAM1,TNF,TOE1,TP53,VCAM1,VEGFA	1413 (20)
HIRA		transcription regulator		1.633	0.0425	Ccl2,CXCL2,CXCL6,EREG,FLT1,SPHK1
FOSL1		transcription regulator		1.632	5.37e-05	ANKRD1,AXL,BDNF,Ccl2,Ccl7,CCN1,CCND1,CD44,CDKN2A,CXCL6,CYP2J2,EDN1,EGR1,FOS,FOSB,GCLC,HPGD,JUN,MAP1B,MMP9,NRP1,PLAU,RUNX2,SEMA6D,SERPINE1,SERPINE2,SFTPD,TF,THBS1,TNF	997 (18)
GLI1		transcription regulator		1.628	2.17e-06	ABCG2,ARPC5,BCL2,BCL2L1,BID,BNC1,Ccl2,CCND1,CCND2,Cd24a,CD44,CDC34,CLU,CMBL,COL1A1,COMMD3-BMI1,CSF1,EGR3,EPB41L4B,FHL1,FOXA2,FOXM1,GPER1,GRIA3,IDS,IGFBP7,INSIG1,IRS1,JAG2,KLF4,KRT19,LZTS1,MMP9,MRPS6,MUC5AC,NDRG2,NR2F2,PAPSS2,PDGFA,PDZRN3,PLPP2,POMC,PRKCE,PSTPIP2,PTHLH,RAB34,RNASEL,RPS6KA1,RUNX2,RXRA,SDHA,SOX6,SOX9,SPP1,SYNE1,TIMP3,TNC,TNFSF13B,TOM1,TP53,VEGFA,VIL1,VIM,ZC3HAV1L	1339 (25)
KLF5	-0.353	transcription regulator		1.62	0.00171	ACADM,ACOX1,ARG1,BCL2L1,CCNA2,CCNB1,CCND1,CDKN1B,FAM110A,FGFBP1,ILK,KLF5,MMP9,NOTCH1,PCNA,PDGFA,PDGFB,PPARG,SORCS2,WNT10A	1272 (21)
TEAD4		transcription regulator		1.598	0.0144	ACTA1,ARID5B,BMP4,CCN1,CCN2,CCND1,CDKN1B,CDX2,CIDEC,DGAT2,EDN1,FGFR2,FLT1,JUN,NOTCH3,NUAK1,PLK2,PPARG,RAD51,RB1,SLC2A4,SLFN5,TFAP2C,THBS1,TNNT2,VEGFA
YY1		transcription regulator		1.59	1.2e-06	ACTA1,ANKRD1,ARID3A,AURKA,BAK1,BCL2L1,BCL2L11,BDNF,BGLAP,BIK,BMP4,BMP6,BTG2,CAPG,CASP7,CBX3,CCNA2,CCNB1,CDCA3,CDKN1B,Cdkn1c,CDKN2A,CEBPB,CENPA,CLU,COL1A1,CRYAB,DKK2,DMD,DMPK,EDN1,EGR1,EIF4G2,ERBB2,FEN1,FOS,FOXM1,GFER,HAS2,HELLS,HMGCR,Hnrnpa1,ID3,ID4,IL1R1,INCENP,KIF20A,KIF23,KLF4,LDLR,LMAN1,LMNB1,MCM4,MCM5,MCM7,Mcpt2,MDM2,NCAPD2,NNAT,NR3C1,PCNA,PDGFA,PLAGL1,PLK1,Pmaip1,POLA1,POLK,PRC1,PSRC1,QKI,R…	1173 (20)
HDAC6		transcription regulator		1.57	0.00136	ADAMTS1,AR,BAX,BCL2,COL1A1,ICAM1,JUN,LTBP2,NR3C1,PDGFB,PLAU,SERPINE1,TGFB1,TGFBI,TNF,VCAM1,VIM	1272 (18)
KMT2D		transcription regulator		1.565	4.62e-11	ACADM,Acot1,ACOT4,ADGRG1,ADGRG2,ANO10,AP1S3,B3GNT6,BAG2,CA4,CCDC160,CD55,CKAP4,CRIP1,DSC2,DSG3,EBF4,ECHDC2,ENO3,FAH,FAM117A,FHL1,FOXQ1,GJB2,GKAP1,GPRC5C,GRHL1,GUSB,HAUS4,HOPX,IKZF2,IRF1,JAG2,KCTD15,KLF4,LAMB3,Larp1b,LTK,MARVELD1,METRNL,MFSD9,MMP9,MYOM3,NEIL2,NT5E,POLE,PPARG,PPIC,PPP1R26,PPP2R2B,PRR15,RAB38,RAB42,RIMKLB,SIX4,SLC35F5,SLC38A6,SMO,SORD,SPRR1A,STBD1,TCEAL1,TGM1,TNNT2,TOX3,Tpm4,Zfp760,…	470 (7)
E2F2	-0.899	transcription regulator		1.554	0.00188	BCL2,CCNA2,CCNB1,CCND1,CDCA4,CDKN2A,FGFR2,Gcg,JMY,MCM2,MCM3,MCM4,MCM5,MCM7,ORC1,PCNA,POLA1,RAD51,RBL1,RRM2,SERPINE1,TOPBP1,TP53	1357 (19)
SOX3		transcription regulator		1.528	0.00672	ACVR2A,BMPER,CDX2,CITED1,DLL1,DSP,EFEMP1,EVX1,FABP2,GREB1,INHBA,IRS1,KIF16B,LMX1B,NRP1,Oasl2,RET,SOX9,TEAD2,TGFB2,TNFRSF19,TXNRD1,VEGFA
CARM1		transcription regulator		1.461	1.09e-06	ABCB11,C3,Ccl2,CCNB1,CDKN2A,CDX2,CXCL10,CXCL3,EGR3,EPHX2,FOS,FTH1,FTL,GADD45A,GCLC,HSP90AA1,ICAM1,IGFBP4,PCK1,STC2	1275 (22)
ZBTB48		transcription regulator		1.431	0.0294	ACKR3,ARHGAP24,CDKN2A,CPM,FOSB,PXMP2,SNX15,SPP1,TUBA4A,VWA5A
WDR5	0.305	transcription regulator		1.407	0.0028	CDH2,ERBB2,IGF2R,MDM2,RUNX2,SFRP2,SPP1,TMPRSS2,TP53,VIM	846 (13)
MEF2D		transcription regulator		1.369	0.000604	ACTA1,BACH2,BDNF,CCN2,CCND1,FN1,FOS,FOSB,GCLC,GSTA3,GSTA5,JUN,MCM3,MCM5,NQO1,NR4A1,PCNA,SLC2A4,SRXN1,SYK,TGFB1,TGFB2,TGFB3,VIM,ZEB1	1209 (17)
RELA	0.371	transcription regulator		1.343	4.4e-12	ABCB1,ABCG2,AHR,ANKRD1,AP3M2,APP,AR,ARFGAP3,ASCL2,BACH2,BAX,BBC3,BCL2,BCL2L1,BCL2L11,BMP2,BNIP3L,BTG2,C3,Ccl2,CCL5,CCN2,CCND1,CD14,CD40,CD44,CDC14A,CDKN1B,CDKN2A,CEBPB,CITED2,COL1A1,CRYAB,CSF2,CXCL10,CXCL2,CXCL3,CXCL6,CYP2C9,DNMT3B,DOCK8,EDN1,EGLN1,EGR1,ELF3,EPCAM,ERBB2,F3,FCGRT,FN1,FOS,FOSB,FSCN1,GCH1,GDF15,GNA13,HAS2,HNF4A,HSD11B2,ICAM1,IER3,IFIT1B,IGF1R,IKZF2,IL1RN,IL23A,IRF1,IRF7,ISG15,ITCH,J…	1141 (12)
ZBTB33		transcription regulator		1.342	0.00768	BAX,BBC3,BCL6,BID,MMP7,PGK1,TNFRSF10A
MYCBP		transcription regulator		1.342	0.00227	CAD,CCND2,CDK4,LDHA,NCL
RBCK1	0.32	transcription regulator		1.342	0.0052	ATP1A1,CCNB1,CCND1,ICAM1,VCAM1	943 (12)
SOX4	0.659	transcription regulator		1.338	4.76e-11	Acot1,ACY3,AIF1L,Akr1c12/Akr1c13,ALDH1B1,AMOTL1,APBB1,AZI2,BAX,BBC3,BCAR3,BCL2,BEX3,CASP1,CD1D,CDH2,CLIC6,CSNK1E,DBNDD2,DDAH2,Dst,EFNA5,EMP1,EPG5,EVL,FHL1,FN1,FOS,GGA2,IGFBP4,KDM7A,LHFPL6,LMO7,Ly6a (includes others),LY6D,LYZ,MAGED1,MEX3A,MGST2,Mt1,NRP1,NUAK1,OVOS2,PARD6G,PITRM1,PLEKHA1,PLXNA1,PLXNA2,PPIC,PPM1F,PRXL2A,PYGL,RARRES1,RNASE4,RNF144A,SEMA3B,SEMA3E,SEMA3F,SERPINE2,SLC17A8,SLC2A6,SNN,SNX…
HOXA5		transcription regulator		1.321	0.00102	BGLAP,COL1A1,EGR1,GADD45B,IHH,KLF10,MDM2,RUNX2,TGFB1,TGFB3,TP53
ASXL1		transcription regulator		1.291	0.00098	ATP1A2,FAM162A,HK2,HYAL1,KLF15,LRP2BP,MCM2,PDCD4,PELI2,PGK1,PPARG,PPARGC1B,RAB12,SERPINE1,SLC2A4,VEGFA	551 (7)
SMAD5		transcription regulator		1.253	0.00145	BMP2,CCN2,CSF1,ICAM1,ID3,ID4,IL3RA,PDGFA,PDGFB,RUNX2,SERPINE1,VCAM1,VEGFA	1194 (18)
AIP		transcription regulator		1.252	0.0144	ACKR3,ADRA1D,AHR,AKAP5,CYP1B1,GPR39,GPRC5A,PDE3A,PDE4B,PDE9A,PLAGL1,PROKR1,RGS16,RGS2,RGS4
TCF3	0.542	transcription regulator		1.252	3.92e-12	AATF,ACACB,ADA,AGRP,Aldh1a7,ANLN,ANXA6,AP3B1,AURKA,AXIN2,BACH2,BCL2L11,BCL6,BID,BIK,BTNL2,BUB1,CCL28,CCNA2,CCNB1,CCND2,CCR9,CD200R1L,CD55,CDC20,CDCA3,CDKN2A,CKAP4,Clec2d (includes others),COL1A1,CREB3L2,CYP11A1,DSTN,DUT,ECT2,EDEM1,EIF4EBP1,EPCAM,ETS1,FGD2,FGFR2,GADD45A,GADD45B,GLUL,GM2A,GPAM,H1-0,HMGB2,HMMR,HSD17B14,ID3,IFI16,IKZF2,IL18R1,IL18RAP,IRF1,JUN,KCNN4,KIT,KLF4,KLF6,KLF7,LDHA,LDLRAD4,LEF…	931 (20)
FOXC1		transcription regulator		1.238	0.0408	BCL2L11,DLL1,LFNG,MMP7,MMP9,NOTCH1,RUNX2,SERPINE1
PPP1R13L	0.435	transcription regulator		1.195	0.0423	BBC3,CCND2,DSP,GJA1,Ivl,PKP1,SLC2A1
SIRT1		transcription regulator		1.158	3.6e-13	ABCA1,ABCB1,ABCC2,ABCG1,ACADM,ACTB,ADAR,AQP11,ARG1,ARNT2,ATXN10,BAX,BBC3,BCL2,BCL2L1,BDNF,BNIP3,CA12,Ccl2,CCL5,CCND1,CCND2,CCNG2,CD63,CD81,CDH2,CDKN1B,CDKN2A,CEBPB,CPT1A,CRYBG2,CYCS,DDAH2,DDX60,DHX58,EDEM1,EIF2AK3,EIF2S2,ENTPD8,EP300,ERMP1,EVPL,FN1,FOXO3,GABARAPL1,GADD45A,GFPT1,GSTA3,GSTM1,HELZ2,HK2,HLA-A,HMGCR,ICAM1,IDH2,IFI44,Ifi47,IFIT1B,IFIT3,IGF1R,IRF7,IRGM,KDM2B,KIF13B,KIF1A,LAMB1,LDLR,LGAL…	1146 (17)
CALR		transcription regulator		1.157	0.0319	B4GALT1,Calm1 (includes others),CASQ2,Ccl2,CDH2,COL1A1,CXCL3,FN1,GJA1,ICAM1,RYR2,TGFB1,TNF,TP53
TAF4B		transcription regulator		1.151	2.22e-05	CCN2,CCND2,FN1,FST,IER3,INHA,INHBA,IRF1,ITGA6,JUN,RET,SPP1,TGFB1,TGFB3
SUB1		transcription regulator		1.149	0.00617	ADGRL1,BAX,CAMK2B,CCND1,CNTFR,FOS,GADD45A,KCNJ4,MDM2,STMN2,VEGFA	1156 (12)
SOX1		transcription regulator		1.147	0.0359	ACVR2A,BMPER,CDX2,CITED1,DSP,EFEMP1,EVX1,FABP2,GREB1,INHBA,IRS1,KIF16B,NRP1,Oasl2,TEAD2,TGFB2,TNFRSF19,TXNRD1,VEGFA
ID1		transcription regulator		1.141	2.18e-05	ALDH1A1,BCL2L1,CCN2,CCND1,CDKN1B,CDKN2A,CEACAM1,DTX4,EGR1,EVX1,FN1,FOXA2,ICAM1,IFI16,Ly6a (includes others),MMP14,MMP9,NOTCH1,PROM1,RUNX2,SLC5A5,TF,THBS1,TMPRSS6,TNF,TYMS,VIM	1272 (20)
SP1		transcription regulator		1.106	1.34e-17	ABCA1,ABCB1,ABHD2,ADA,ADAMTS1,ADCY4,ADRA1D,AFAP1L1,AGTR1,AKAP12,Akr1b7,ALDH3A2,ALOX5,ANKH,AR,ASS1,ATP2A3,BACE2,BAG2,BAX,BBC3,BCL2,BDNF,BGLAP,BMP4,BNIP3L,C1QBP,CAD,Ccl2,CCL5,CCN2,CCNA2,CCND1,CCND2,CCNG2,CD40,CD55,CDC42BPG,CDH2,CDK4,CDKN1B,CDKN2A,CEACAM1,CEBPB,CES1,Ces2c,CITED2,COL1A1,COL8A1,CRYAB,CTH,CXCL10,CXCL3,CYP11A1,CYP1B1,Cyp2d9 (includes others),CYP51A1,DBF4,DLC1,DMD,EGR1,ENTPD5,EREG,F2R,F3…	1412 (24)
NKX2-5		transcription regulator		1.077	0.045	ADSS2,ANKRD1,BAX,BCL2,GJA1,HOPX,IFI16,Nes,NR5A2,RYR2,SCN5A,SLC5A5
SPZ1		transcription regulator		1.074	0.0012	CCND1,CD44,CDH2,FN1,MAPK3,PCNA,PROM1,VEGFA,VIM,ZEB1	754 (7)
MEF2A		transcription regulator		1.071	0.000277	ACTA1,ASB4,BDNF,Bex1,CLIC6,DPF3,EDN1,ENO3,FOS,GSTA3,GSTA5,ITGA7,JUN,NR4A1,SHISA6,SLC2A4,TGFB1,TGFB2,TGFB3,ZNF266	865 (9)
IKZF3		transcription regulator		1.069	0.000493	ALOX5,ANTXR1,BCL2,BCL2L1,BCL9L,CD38,CDKN1B,CITED2,DOCK4,DOK4,FN1,IFIT3,IRF7,KIF16B,KLF4,LHFPL2,MAP2,PROS1,RNF213,RTP4,S100A16,SEMA5A,SOX9,TRAPPC3L
RUVBL1	0.499	transcription regulator		1.066	0.0187	AXIN2,CCND2,CYP4F3,ETS1,GADD45B,IGFBP3,MCM3,MCM4,NUDCD2,PCNA,PLAC8,QKI,RBL1,ZDHHC9
KEAP1	-0.344	transcription regulator		1.052	0.0411	Acp5,AHR,BCL2,GCLC,GSTP1,IL18,MMP9,NQO1,PPARG,TOP2A,VCAM1
CREBBP		transcription regulator		1.05	1.8e-08	ADAM12,ADORA2A,AKAP12,ALAS1,ANXA6,AP3M2,AQP11,AR,ARHGAP24,ARHGEF10L,ARHGEF3,ARID5A,BANK1,BCL2,BCL6,CAMK2B,CAMK2D,CAMK4,CAPG,CBL,CCL5,CCN1,CCND1,CCND2,CD44,CDKN1B,CNN3,CSF1,CXCL10,CYP11A1,DDC,EDARADD,EGR1,EGR3,EHHADH,EVL,EYA2,FNBP1,FOS,FOSB,FRMD4A,Gcg,GLCCI1,GM2A,GRAMD2B,GRIA3,HAS2,HMGCS1,HMGCS2,IFIT1B,IGF1R,IL17RC,IL18R1,IL18RAP,INHA,IRF1,ISG15,ITGA6,JUN,KIF1B,LDLR,MAF,MAP3K8,MCF2L,MCM3,MDM2,MFHA…	1222 (16)
TP63		transcription regulator		0.995	6.41e-14	ABCB1,ABI2,ACTL6A,ADA,ADAMTS1,AEN,AHR,APOBEC1,ARG1,ATG9A,AXL,BAX,BBC3,BCL2L1,BCL2L11,BMP4,BRAF,CA4,CAD,CAST,CAVIN2,CCN1,CCN2,CCNA2,CCNB1,CCND1,CCND2,CDH2,CDH3,CDK17,CDKN1B,CDKN2A,CEACAM1,CITED2,COL4A1,CPT2,CSTA,CTXN1,DLL1,DNM2,EFNA4,EMP1,ERBB3,ERCC5,F2R,F3,FGFR2,FN1,FOS,FOXA2,FOXO3,FST,GADD45A,GAPDH,GCNT3,GLB1L2,GLS2,Gm4340 (includes others),GPX2,HK2,HTRA1,ID3,IER3,IFT57,IFT74,IGFBP3,IGFBP7,IHH,I…	1301 (19)
CCNE1		transcription regulator		0.99	0.00795	AR,CCNA2,CCNB1,CD44,MCM2,MCM4,PCNA,PCYT1A,RBL1,TP53	1122 (16)
TCF12		transcription regulator		0.974	4.2e-06	AATF,ACOT8,CCL28,CCR9,CD200R1L,CDKN2A,ELF4,EPCAM,ETS1,FN1,GJA1,GJB2,GLUL,HSD17B14,ID3,IKZF2,IL18R1,IL18RAP,IL7,IRF1,JUN,KLF6,KLF7,LDHA,LDLRAD4,LMO4,LRBA,Ly6a (includes others),LY6D,MAF,MFSD13A,NFKBIE,NOTCH1,NOTCH3,PMS2,POMC,PPARG,PTPN13,RORA,RXRA,SEMA4A,SEMA7A,SOX13,STK17B,TLR1,VEGFA	794 (11)
NFKBIA		transcription regulator		0.972	1.65e-18	ABCD3,ACKR3,AGTR1,AK2,ANKRD1,AXL,BAX,BCL11A,BCL2,BCL2L1,BID,BMP2,BNIP3,BTG2,C3,CAPZA2,CARD10,Ccl2,CCL5,Ccl7,CCNA2,CCNB1,CCND1,CCND2,CCR1,CCR3,CD40,CDH13,CDH3,Cdkn1c,CEBPB,CITED4,CKS1B,CLU,CP,CREB3L3,CRYAB,CSF1,CSF2,CTSF,CXCL10,CXCL2,CXCL3,CXCL6,CYBA,CYP1B1,EIF4G2,ENPP2,ERBB2,EREG,F3,FCGRT,FN1,FOS,FOXM1,FSCN1,GADD45A,GADD45B,GCH1,GM2A,GSTM5,Gstt1,HK2,HLA-A,Hnrnpa1,HOXD3,ICAM1,ID3,IER3,IFI16,IFIT1B…	1278 (13)
ETV4	0.64	transcription regulator		0.965	0.000461	B4GALT1,BAX,CDKN2A,ERBB2,ETV4,FN1,GGT1,HPGD,MMP14,MMP7,MMP9,PLEC,SPP1,VIM,WWTR1	748 (7)
GATA4		transcription regulator		0.947	0.00117	ACE2,ACTA1,ADSS2,AGTR1,ANKRD1,ARRDC2,ASS1,BCL2,BCL2L1,CA12,CASQ2,CCN2,CDX2,CLDN2,COL1A1,CXCL2,CXCL6,CYP11A1,EDN1,EPHX1,ESPN,EVPL,FAP,FGF3,FOS,GJA1,GPI,HAO2,HSD3B1,IFI16,INHA,INHBA,JUN,KCNJ2,KIT,KRT27,LCN2,LDHA,LRG1,LTBP2,MC2R,MYL7,NOTCH4,NR5A2,OVOL1,PFKP,PLIN4,PTGS1,PYY,RYR2,SCN5A,SLC25A29,SLC8A1,SLC9A3,SOX9,SPP1,SPRR1A,Sprr2h,TCAF1,TGFBI,TNNT2,TRIB2,VCAM1,VIM	519 (7)
PLAG1		transcription regulator		0.926	0.00667	BCL2,CREB3L1,EFNB1,ETV4,FLNC,GJB1,KCNJ4,KRT19,MAP2,MYRF,NPTXR,PIR,PLEC,PPIC,PTP4A3,RBP2,TSPAN4,VEGFA
EP300	-0.273	transcription regulator		0.914	1.85e-11	ACACB,ACADM,ACTA1,ADAM12,ADORA2A,AKAP12,ANXA6,AP3M2,AQP11,AR,ARHGAP24,ARHGEF10L,ARHGEF3,ARID5A,AXIN2,BANK1,BAX,BBC3,BCL2L1,BCL6,CA12,CAD,CAMK2B,CAMK2D,CAMK4,CAPG,CBL,CCND1,CCNG2,CDKN1B,CDKN2A,CNN3,CPT1A,CPT2,CXCL3,CYP11A1,DDC,DIO1,EDARADD,EDN1,EGR1,EP300,ERBB2,EVL,EYA2,FN1,FNBP1,FOS,FRMD4A,FTH1,Gcg,GLCCI1,GM2A,GRAMD2B,GREB1,H6PD,HES6,HMGCR,HMGCS2,HSD11B2,HSP90AB1,ID3,IFIT1B,IGF1R,IL17RC,IL18R1,IL…	1520 (22)
TFAP4		transcription regulator		0.895	6.03e-07	BCL2L1,CASP9,CCNG2,CD44,CDH2,CDKN2A,CLDN4,CLDN7,EGR1,FN1,FOS,GDF15,LEF1,LGR5,LIF,MDM2,PKP3,RHOBTB3,RPE65,SALL2,VIM	936 (7)
ARRB1	-0.38	transcription regulator		0.895	0.00276	ABCG2,ADRB2,BCL2,Ccl2,EGR1,ENAH,F3,IRS2,LEF1,SERPINE1,SPP1,TNF,VCAM1	831 (19)
GMNN		transcription regulator		0.894	0.038	ACVR2A,BMPER,CDX2,CITED1,DSP,EFEMP1,EVX1,FABP2,FOXJ1,GREB1,INHBA,IRS1,KIF16B,NRP1,Oasl2,TEAD2,TGFB2,TNFRSF19,TP53,TXNRD1,VEGFA
ETV1		transcription regulator		0.877	0.00256	ACSL3,ADRB2,ERBB2,HSD17B7,IL23A,IL7,MMP7,POMC,SOX9,TMPRSS2,VIM,WWTR1
NPM1	0.402	transcription regulator		0.862	0.00641	Ccl2,CSF1,CXCL2,CXCL3,FOXM1,IL6ST,LTF,MMP9,NPM1,TNF,TP53,VEGFA,XPC	1305 (21)
POU2F2		transcription regulator		0.853	0.00569	ADA,Aldh1a7,ALDOC,ALOX5,BANK1,BBC3,BCL6,DHRS9,EIF2S2,ENO1,FCRL1,FRMD4A,GATM,GGA2,JUN,KCNN4,LY6E,MCM7,MOCOS,MS4A1,PLEKHG1,PRR7,RPS2,SPP1,TIMP2,TNFRSF21,VIP
ONECUT1		transcription regulator		0.849	0.00629	AASS,ABCA8,ABCB11,ABCC2,ACACB,ACP3,AGTR1,AKAP13,AKR1C4,ALDH3A1,ALDH5A1,APOH,ARHGAP32,ARL1,ATG9A,BNIP3L,CFI,CLDN2,CLNS1A,CXCL3,CYP51A1,EID1,ELOA,ELOVL1,EMG1,FADS3,FAM117A,FOXA2,FOXA3,GBF1,GJB1,GSS,HMGB2,HMGCR,HNF4A,HSPH1,IFT74,KDM8,LSG1,MAGED2,MFSD1,MGST3,NDC1,NR1I2,ORC1,PCK1,PTPRR,RECK,RORA,RORC,SEMA6A,SERPINB8,SGIP1,SLC25A13,SNRPD2,STMN2,TAT,TBCK,TM4SF4,TMBIM6,TMOD2,TRUB2,TTI2,VWA5A,WDR12	438 (6)
TWIST1		transcription regulator		0.816	4.67e-10	ADAMTS1,ALDH1A1,AOPEP,AR,AXL,BAX,BCL2,BCL2L11,BGLAP,C1QTNF1,C3,CBX2,CCDC3,Ccl2,CD40,CD44,CDH2,CDKN2A,CLDN4,CLU,COL1A1,EGFL6,EPCAM,ETS1,FGFR2,FN1,FOS,GPC1,IGFBP4,ITGB5,KCNN4,KIT,LRG1,MFGE8,MGST3,NT5E,PDZD2,PROM1,PTPRZ1,RHOC,RUNX2,SDC3,SEMA5A,SLC28A3,SPHK1,SPOCK2,SPP1,TCF3,TF,TGFB1,TGFB2,TGFBI,TIMP3,TNF,TNFRSF21,TP53,UNC5B,VCAN,VEGFA,VIM,ZEB1,ZYX	1212 (19)
E2F4		transcription regulator		0.788	1.45e-05	ANLN,BCL2,BCL2L11,BNIP3,CCNA2,CCND1,CDCA3,CDCA4,CENPA,CHEK2,CKS1B,DBF4,DUOX2,DUT,E2F2,ECT2,FANCC,FDFT1,FEN1,FOXM1,FOXN1,FPGT,HMMR,ID3,LPAR1,MCM3,MCM4,MCM5,MRTO4,MSH2,MTHFD1,NCL,NEK2,NPM1,ORC1,PCNA,PKN2,PLK1,PLSCR1,POLA1,POLD1,PPARG,PPP2R2B,PRC1,PRPSAP1,PSAT1,RABIF,RAD51,RB1,RBBP8,RBL1,RRM1,RRM2,SERPINE1,SMC2,SSX2IP,STMN1,TNF,TOP2A,TOPBP1,TP53,TP53INP1,UBE2C,UHRF1,XPC	754 (13)
NFIC	0.37	transcription regulator		0.781	0.000144	ADAM12,ALDOA,CCNB1,CCND1,CDKN2A,CSF1,CYP11A1,HTRA1,LEF1,PDGFA,PKLR,RPE65,SLC25A5,TGFB1,TP53	1041 (12)
RUNX2	0.678	transcription regulator		0.769	0.00363	ABCB1,ALPP,AXIN2,BAX,BCL2,BGLAP,BMP2,CCND1,CDH2,CDHR5,CDKN1B,COL1A1,EDN1,FGFR2,FLRT2,FN1,GADD45B,GALNT3,HAPLN1,HTRA1,IGF1R,IHH,LEF1,LGALS3,MMP14,PLAU,RUNX2,SERPINE1,SGPP1,SOX6,SOX9,SPP1,TNFRSF11B,VEGFA	957 (18)
KLF10	-0.273	transcription regulator		0.759	0.0012	BAX,BCL2,BGLAP,CCND1,CDKN1B,POMC,PPARG,PTGS1,SERPINE1,TGFB1	1260 (20)
HOXD10		transcription regulator		0.742	0.00206	BIRC6,CD44,CEACAM1,DIS3,FMR1,GCNT1,ICAM1,LSM6,MAGED2,MMP14,MTA1,NUDT5,PAK1,RHOC,RPSA,SELENON,SERPINE1,TFPI,TICAM1,TIMP2,WDR5	329 (7)
MYOD1		transcription regulator		0.738	4.79e-05	ACACB,ACTA1,ADCY7,ALDOA,ANKRD1,ARID3A,ASS1,BCL2,BCL2L1,BCL6,BNC1,CADPS2,CDC20,CDCA3,CDO1,CDX2,COL4A1,CRYAB,CYP2S1,DMD,E2F2,ENO3,ENPP2,ETV4,FOXM1,GADD45A,GUCA2A,HADH,HAS2,HES6,Hrc,HSPA4L,IFI16,IFIT2,ITGA7,KIF18B,KIFC3,KLF6,LDB3,LIF,LMNB2,MAP2K1,MYCL,MYO5B,NCAPH,Nes,PBK,PDGFA,PLEKHO1,PLK1,PRKAR2B,RACGAP1,RB1,RBM38,RECK,RPS6KA2,RRM2,SBK1,SLC12A2,SLC2A1,SLC2A4,TEAD2,TGFB1,TNNT2,TOP2A,UBA7,ZBTB18,ZEB1	886 (21)
FOXG1		transcription regulator		0.737	0.00768	BCL2L11,CCND2,FST,GDF11,NCOA3,PCK1,SERPINE1	861 (13)
NKX2-1		transcription regulator		0.728	3.98e-07	AKTIP,BDH1,Bex1,BMP4,CA4,CA8,CD14,CKS1B,CLU,ENC1,ENPP2,EPHB3,FAM3D,FOXQ1,FXYD3,GLCCI1,H2-T3,HELLS,HLA-A,HMGB2,HS2ST1,IER3,IL7,LCN2,LEF1,LRG1,LYZ,MATN4,MREG,MTUS1,NECTIN3,Nes,NOP56,POMC,QKI,RAD51,RET,RNASE4,RRM2,Saa3,SCARA3,Serpinb6b,SERPINB9,SERPINE1,SFTPD,SH3PXD2A,SLC5A5,SLC6A14,Sprr2a1/Sprr2a2,SSBP1,Tcf7,TGFB1,TGFB2,THBS1,TMEM37,TNC,UGT8,VEGFA,WNT5B,WNT7B	846 (9)
MED12		transcription regulator		0.728	0.0182	ANKRD1,BMP4,CREB5,EREG,GDF15,KRR1,LIF,SLC16A6
SIN3A		transcription regulator		0.707	0.000135	Acp5,BCL2,BCL6,BDNF,CCND2,CCNG2,COL1A1,E2F2,GADD45B,GSTP1,INA,KLF10,KLF6,LCE3C,MAP4,MMP9,NCL,NEFH,Nefm,PMM1,SERPINE1,Sprr2h,TXNIP	1215 (15)
EGR3	1.929	transcription regulator		0.698	0.00026	APBB1,BCL2L1,BCL6,EFNB1,HEATR5A,ID3,JUN,LMO7,LTBP3,NAB2,NOTCH1,PDE3A,RCCD1,RET,RORA,RORC,SOX9,TGFB3,ZNF292	850 (15)
HSF1		transcription regulator		0.694	0.0018	ABCB1,BAX,BCL2,BCL2L1,BMP4,CBX3,CCN2,CCNA2,CEBPB,CENPA,CKS1B,CLDN7,CLU,COL18A1,CRYAB,DCTPP1,DLGAP1,DNAJA4,EFEMP1,FOXM1,HERC4,HSP90AA1,HSP90AB1,HSPA4L,HSPB1,HSPD1,HSPE1,HSPH1,ICAM1,ITGB3BP,ITGB5,JUN,LDHA,LDLR,LIF,LSM2,MCM2,MCM3,MCM4,MCM7,MICB,NCOR1,NCOR2,PDZD2,PGK1,PMS2,PPARG,PTOV1,RELA,RRAD,SSBP1,STAG2,TEX15,TNF,UBC,VCAM1,VCAN,ZFAND2A	1257 (21)
ELF3	-0.319	transcription regulator		0.691	0.0171	ANGPTL4,CLDN7,CSF2,ELF3,ERBB2,FN1,IL23A,KRT4,KRT8,LYZ,PPARG,TIMP3
MED1		transcription regulator		0.675	2.89e-06	ACOX1,ACP6,ANAPC5,ANKRD37,AOC1,APOB,AURKA,BAX,BCL11A,BCL2L1,BCL6,BCL7A,CCNB1,CCND1,CCND2,CDC20,CDK4,CENPA,CYP11A1,DIO1,DTYMK,EDF1,EHHADH,ERBB2,FADS2,FOXM1,GADD45A,GREB1,GSTP1,HAS2,HDAC7,HPRT1,IGFBP3,KLF4,LEF1,LIF,LY6D,MDM2,NCL,NR3C1,OLR1,PDK4,PLK1,PPARG,SLC2A4,STC2,Tcf7,TET1,THBS1,TP53,VDR	1557 (26)
CDKN2A	0.736	transcription regulator		0.642	1.23e-09	AK1,ANAPC5,BAX,BBC3,BCL2,BCL2L11,BTG2,C3,CAPG,Ccl2,CCL5,Ccl7,CCN2,CCNA2,CCNB1,CCND1,CCNI,CCR9,CDCA4,CDCA7L,CDKN1B,CDKN2A,CEBPB,CITED2,CPA4,CXCL10,CXCL6,E2F2,E2F6,EEF1A1,EFNA1,EGR1,EPS8,FBL,FBXO5,FEN1,FOS,FST,GABARAP,GAS7,GLB1,GNA13,GNL3,GPRC5A,GTSE1,HACD3,HMGB2,HUNK,IFI35,IL15,IL36B,ITGB5,JAK2,JUN,KANK2,KIFC1,KRAS,LEF1,LGALS3,MCM4,MCM5,MCM7,MDM2,MDM4,MMP9,MRC1,MS4A1,MTA1,NPM1,NR3C1,P4HA2,PCNA,PDG…	1172 (20)
ETS2		transcription regulator		0.627	0.0315	BCL2L1,BMP4,CDKN2A,CDX2,ERBB2,FLT1,FOS,HPGD,ICAM1,JUN,LYZ,MMP9,PLAAT3,PLAU,PSEN1,PTHLH,SPP1,SYK,TNF
MECP2		transcription regulator		0.615	0.0029	ABCB1,ACTB,ADAM12,ANXA1,ARHGAP24,ASH1L,BCAT2,BDNF,CAMK2B,CAPG,CD99L2,CDKN2A,DOCK8,EFNA5,EGR1,ENPP4,FKBP5,GABBR2,GAD1,GSTP1,IGFBP3,INA,MGMT,Mt1,NEFH,Nefm,NR4A1,PLAAT3,PROM1,SEMA3D,SYN3,TIAM1,VEGFA,VIM,YWHAZ	1332 (22)
BHLHE40		transcription regulator		0.605	0.000624	ACTN1,ADGRG7,ALOX5,ANXA1,ATP1B1,BCL2L1,BDNF,C15orf48,CCR1,Cd24a,Clca3b,Cmah,CSF2,CXCL3,CYP11A1,DMBT1,DNAJC13,EPHX1,FABP2,Gkn3,IFI16,IFITM2,IL6ST,INHBA,ITGA6,KIT,KRT8,LEF1,OLR1,PLAC8,SH3PXD2A,SORBS2,Tcf7,TENT5A,TM4SF20	734 (10)
Tcf7	0.773	transcription regulator		0.597	4.77e-06	AHCYL2,Akr1c12/Akr1c13,ATP6V0A1,BCL2,C3orf70,CCR9,CEPT1,CISH,CPE,CSF2,Dst,EGR3,ELK3,EPHX1,ETNK1,FAAH,FRMD6,GGT1,GM2A,GPA33,HSD17B11,ID3,IGF1R,IL1R1,IL34,ITGB8,KIT,KLF6,LDLR,LEF1,LYSMD2,MAF,MBOAT1,MSMO1,MXD1,Naip1 (includes others),NCOA7,NR5A2,NRN1,NTN4,OSBPL3,OSBPL5,PAPSS2,PARP1,PLCB4,PPARG,PRKD3,RORC,SC5D,SH3RF1,SLC35D1,SOX12,SOX13,SPRY1,SQLE,STX11,TGFB1,TGFB3,TIAM1,TICAM1,TLR1,TMEM158,TNF,TNFRS…	1484 (21)
PAX3		transcription regulator		0.593	0.00121	ALDH3A2,ANXA1,AP3M2,APP,ASS1,BCL2L1,BMP4,CDH3,CLU,CRY1,CYP1B1,DBN1,ECPAS,EYA2,F3,FHL1,FMR1,GLB1,GPT,GSTM5,HSPG2,ID3,ID4,IFITM2,IRS1,LAMB3,MCAM,MCC,MDM2,MICB,MMP9,PCNA,PHGDH,PKIA,PPP1R2,PTHLH,PTPN14,RET,SHMT1,SNRK,SOX4,TAX1BP1,TCF3,TCN2,TGFB2,TIMP3,TNC,TP53,TSPAN3,TYRO3,VCAN	1144 (15)
ARID1A		transcription regulator		0.586	0.000109	ANXA1,ASCL2,AXIN2,BMP4,CEACAM1,CXCL2,ERBB2,EREG,F2R,FGFBP1,FOXJ1,FZD2,FZD5,FZD9,IGFBP3,IRS2,LRP6,PIK3IP1,SOX9,TCF7L2	1131 (22)
VAV1		transcription regulator		0.57	0.0294	BAX,BCL2,CCND1,CCND2,CDKN1B,FOS,JUN,RELA,TNF,VEGFA
MYCN		transcription regulator		0.565	2.56e-13	ABCA1,ABCA2,ABCB1,ABCB10,ABCB9,ABCC3,ABCD3,ABCD4,ABCG2,ACTB,ALDH1A1,ALDOA,AMOTL2,APEX1,BASP1,BAX,BCL2L1,BID,CAD,CCN2,CCND1,CCND2,CCNG2,CDKN1B,CITED2,CKAP4,CLU,COL18A1,COL1A1,COL4A1,COL8A1,COMMD3-BMI1,DUSP7,E2F2,E2F5,EEF1A1,EEF2,EIF4G2,FGFR2,FN1,FOXA2,FRMD6,GAPDH,HDAC2,HK2,HLA-A,HSP90AB1,HSPD1,IGFBP7,INHBA,LDHA,LGALS1,LRRN1,MAP4,MDM2,MSRB3,NCL,NDRG1,NME2,NPM1,P3H1,PA2G4,PDK1,PHB,PHGDH,POLR2L,RGS5,…	1276 (24)
SOX10		transcription regulator		0.563	0.014	ACKR3,DHH,ERBB3,FOS,GAS7,ITGA6,L1CAM,LAMB1,NOTCH1,PMP22,RET
PML		transcription regulator		0.556	1.72e-08	ACACB,ACADM,ACOX1,BAX,CCND1,CDH2,CDKN2A,CPE,CPT1A,DDX60,DNAJA4,DNAJC9,DRC1,ELOVL6,FTL,GADD45A,GPAM,HADHB,HERC6,HLA-DMB,HMGCR,HMGCS1,HSD17B7,HSPB1,IFI35,IFI44,IFIH1,IFIT1,IFIT3,IRF7,ISG15,LDLR,LYZ,MAF,MAP2K1,NDRG1,NQO1,NR3C1,OAS1,OAS2,OAS3,PDK4,PLSCR1,PRKCA,PSMB8,PSMB9,RSU1,RXRA,SLC25A20,STMN1,TAP2,TOPBP1,TP53,TPD52L2,TXN,TXNRD1,VIM,ZEB1	1348 (24)
WBP2		transcription regulator		0.543	0.00718	APOB,ATG4D,AXIN2,BMP4,C9orf116,CASP7,COL4A1,CTF1,CTH,CXCL2,CXCL3,EGR1,FHL1,FOXQ1,GLCCI1,HAS2,HMGB2,IL23A,ISYNA1,JUN,LEF1,LGR5,LIPG,MBOAT1,MFSD8,NKIRAS2,PIMREG,RASGRP3,SFXN3,SLC16A3,SOX4,SPRY1,SYNM,TEF,TNIK	933 (13)
GATA2		transcription regulator		0.54	0.00451	4930467E23Rik (includes others),ADGRG1,AK1,ALOX5,ANGPTL2,AQP9,AR,ARNT2,C9orf116,CCDC68,Ccl2,CCL5,Ccl7,CCND1,CCR3,Cd33,CD40,CDKN1B,CES1,CMA1,CPT1C,CSTA,CXCL10,CXCL2,Cxcl3,CYP11A1,CYP4F11,DDIT4L,DLL1,DMBT1,E2F2,EDN1,EPHA3,ETS1,ETV6,F2R,FAT1,FCHO1,FGD4,FYB2,GABRP,Gcg,Gm3383 (includes others),GRAP2,GUCA2A,HHEX,HNF4A,ICAM1,ICAM4,IGFBP7,IL3RA,INKA2,KIT,KLF4,KRT31,LCN2,LTF,Ly6a (includes others),Mcpt2,M…	1429 (22)
PSMD10		transcription regulator		0.522	0.00795	BAX,CCND1,CDK4,CDKN1B,EIF4EBP1,FNBP1,ICAM1,MRAS,PCNA,TP53	1077 (21)
LDB1	0.527	transcription regulator		0.518	8.5e-11	ABCB10,ACOX2,ACTB,ACVR1B,ADAMTS9,AHR,ALDH1B1,ANXA1,APOBEC1,ARID3A,ATP13A2,AXIN2,BBC3,BCL11A,BCL2,CASP1,CCND2,CDH13,CDKN2A,CLDN2,CLDN4,COL18A1,DHX58,EPHB4,ETV3,F2R,FES,FTH1,FZD5,FZD6,GDF11,GJA1,GOLM1,GPRC5B,GTSE1,HHEX,IFIH1,IGF2R,IL34,IRS2,ITM2C,KIT,KLF11,LEF1,LGALS1,LHFPL2,LMCD1,LPIN2,MAP3K8,MFGE8,MGST2,NDRG1,NLRP1,NLRP10,NOTCH3,NPRL3,NSG2,NT5E,Oasl2,PATZ1,PBX1,PCBP3,PDZD2,PKD2,PLCG2,PLSCR1,PSTPI…
Esrra		transcription regulator		0.514	7.17e-05	ACADM,ACE2,ACOX1,ALDOA,ALDOC,ATP1A1,BDH1,BGLAP,BPGM,CPT1A,CPT2,CRAT,CYCS,ECH1,ENO1,ENO3,ERBB2,FABP2,GALM,HSD3B1,IHH,KCNQ1,PCK1,PCK2,PDK1,PDK4,PGM1,PNLIPRP2,PPA1,PPP1R1B,PYGL,Scd2,SLC2A1,SOX9,SPP1,TGFB3,TNF	992 (15)
FOSL2		transcription regulator		0.508	0.0462	ABCA1,BDNF,BGLAP,Ccl2,CEBPB,CSF2,CYP2J2,F3,HPGD,RUNX2,S100a7a,SFTPD,SOX4,SPP1,TP53
SS18		transcription regulator		0.5	0.000121	BCL2L11,CAMK2B,DLL1,EPHB3,FAM43A,FGFR2,GADD45B,GCH1,GPR137B,JAG2,METRNL,PDGFB,RET,RRAD,SLC16A3,SYNE1
PITX2		transcription regulator		0.496	0.00786	ADH1C,ATP1A1,ATP1B1,CCND1,CCND2,CDH2,COL8A1,Cryzl2,DACH1,DHRS7B,EGR1,FMO2,FOXA2,FZD2,FZD3,FZD9,GAD1,GADD45A,HPGD,IDH2,KCNQ1,LDHA,LEF1,LMX1B,ME3,MMP20,MSRA,PLOD2,POMC,PYCR2,RDH14,SHOX2,VIM,WNT9A	1288 (25)
MITF		transcription regulator		0.483	0.00486	Acp5,AP1S1,APOLD1,ASAH1,ATP1A1,BCL2,CA14,CCNB1,CCNF,CCNG2,CD44,CDCA3,CDKN2A,CMA1,COL1A1,CRYBG1,ECT2,ESRP1,FGD4,FN1,FOS,GM2A,GMPR,GPM6B,GPR137B,GPRIN1,GREB1,HAPLN1,HPGD,ITPKB,KIF20A,KIFC1,KIT,LGALS3,LYST,MCM2,MCM4,MCM5,Mcpt2,MGAT4B,MICAL1,MMP14,NCAPD2,NPM3,NR3C1,NUF2,PIR,PLK1,POLD1,PSMC3IP,SEMA6A,SERPINE1,SOX13,SOX6,SOX9,TACC3,TDRD7,TP53,TXNIP,UBE2C,XRCC3	1306 (24)
ATF6		transcription regulator		0.461	0.0192	ACOX1,APP,AURKA,BUB1,CEBPB,CPT1A,CPT2,FOS,HMMR,LMAN1,NUCB2,PCK1,PDX1,PLAT,SLC39A14,SRR,UBE2C,VEGFA
NFKBIB		transcription regulator		0.452	0.00037	BCL2L1,BCL2L11,Casp12,CASP7,CASP9,CCL5,CD40,CXCL2,EGR1,ICAM1,IGF1R,MMP9,PLAU,Saa3,SYTL1,TNF,TP53INP1,VCAM1,VEGFA,XIAP	884 (11)
SRF		transcription regulator		0.451	5.69e-11	ABCA4,ACTA1,ACTB,AKAP12,ANKRD1,ANKRD6,APOLD1,AZI2,BCL2,BCL2L1,BCL2L11,BMP2,BPGM,Cald1,CAP1,CCL5,CCM2,CCN2,CDK4,CLDN15,CMA1,CNN2,CPM,CSRP1,Cyp2d9 (includes others),DMD,DSTN,E2F5,EGR1,EGR3,EPG5,ETS1,EYA2,FGF12,FHL1,FLNA,FLT1,FLT4,FOS,FOSB,FOXQ1,FST,GADD45A,GCH1,GLIPR1,GLRX3,GPATCH4,GSTM5,HEATR5B,HES6,HSPG2,IL15,ITGA6,JUN,KDSR,LAMA3,LBH,LCN2,LDB3,LDLR,LMCD1,LRP1,LRP4,LTF,MAP4K4,MAPK13,MBD2,MCF2L,MGS…	983 (21)
NACC1		transcription regulator		0.447	0.0404	BAX,BCL2,BCL2L1,MATN4,TP53
EZH2		transcription regulator		0.443	7.33e-05	ACKR3,ACTB,ADRB2,ANXA6,AXIN2,BCL2,BCL2L11,BGLAP,BMP1,BMP2,BMP4,C15orf48,C3,Ccl2,CCL5,CCND1,CCND2,CD63,CDH2,CDK4,CDKN1B,CDKN2A,CEMIP,CHRM3,CHRNB1,COL1A1,COL4A1,CPD,CSF2,CXCL10,CXCL2,CYP1B1,DMRTA2,DNAH2,EFNA1,EGR1,EP300,ERBB2,EVX1,FGF3,FKBP5,FLT1,FOXJ1,FOXO3,FUCA1,GDF15,HSD11B2,ICAM1,Ifi27l2a/Ifi27l2b,IGFBP3,IL18R1,IL18RAP,IL23A,IRAK3,KLF4,KMT2C,KRAS,LAMB3,LCN2,LTB,MAL2,MMP7,MMP9,MYL6,MYL6B,NCOA7,N…	1285 (20)
ATF4		transcription regulator		0.44	3.29e-06	ABCA1,ABCG2,ANKRD1,APEX1,ARHGAP23,ARHGAP24,ATP1A2,ATXN1,BBC3,BCL11A,BGLAP,CA9,CAST,CD55,CDC42EP1,CDKN1B,CDKN2A,CEBPB,COL4A2,CPT1A,CTH,CXCL2,EIF2S2,EIF4EBP1,FN1,GADD45A,GCH1,GDF15,HNF4A,IARS1,IGFBP7,IHH,JUN,KLF4,LGALS3,MGST1,MID1IP1,NDRG1,NOX4,PCK1,PCK2,PHGDH,Pmaip1,PMP22,PPARG,PSAT1,PSEN1,SHMT2,SLC1A5,SLC38A1,SLC39A14,SLC7A1,SLC7A5,STC2,TGFB2,TNFRSF11A,TNFRSF11B,VEGFA,XDH,XRCC1	1011 (19)
BRCA1		transcription regulator		0.439	2.41e-10	ACTB,AK1,APOBEC1,AR,ASCL2,BAK1,BAX,BCL2,BCL2L1,CAMK2B,CARD10,CCL5,CCNB1,CCND1,Cd24a,CDH3,CDKN1B,COL18A1,CTSF,CYP1B1,DGKA,EGR1,ENPP2,EP300,ERCC5,FEN1,FKBP5,FOXO3,FXYD3,GADD45A,GADD45B,GDF15,HSD11B2,HSPB1,IFIT1,IFIT2,IFIT3,IGF1R,IRF7,KIT,LAMA3,Ly6a (includes others),MATN4,MDM2,NEK2,NOTCH1,NQO1,NR3C1,PCNA,PLK1,PLSCR1,POLR3E,RAD51,RB1,RBL1,ROBO1,RUVBL2,SERPINE2,TNF,TNFRSF18,TP53,UBE2I,VCAN,VEGFA,VIM,…	1232 (19)
LMO2		transcription regulator		0.417	1.05e-10	ABCB10,ACOX2,ACTB,ACVR1B,ADAMTS9,ADGRG1,AHR,ALDH1B1,ANXA1,APOBEC1,ARID3A,ATP13A2,AXIN2,BBC3,BCL11A,BCL2,CASP1,CCND2,CDH13,CDKN2A,CLDN2,CLDN4,COL18A1,DHX58,EPHB4,ETV3,F2R,FES,FTH1,FZD5,FZD6,GDF11,GJA1,GOLM1,GPRC5B,GTSE1,HHEX,IFIH1,IGF2R,IL34,IRS2,ITM2C,KIT,KLF11,LEF1,LGALS1,LHFPL2,LMCD1,LPIN2,MAP3K8,MFGE8,MGST2,NDRG1,NLRP1,NLRP10,NOTCH3,NPRL3,NSG2,NT5E,Oasl2,PATZ1,PBX1,PCBP3,PDZD2,PKD2,PLCG2,PLSCR…	323 (6)
MBD2	-0.274	transcription regulator		0.41	0.0497	ACTB,ASS1,BCAT2,CDKN2A,EFNA5,GSTP1,HK2,MGMT,MMP9,PLAAT3,PLAU,PLK1,PROM1,RNASE1,SGK2,TESK2,XIAP
TCF7L2	-0.544	transcription regulator		0.401	2.84e-23	ABHD17B,ACOT4,ACSL3,ACY3,ADAMTS4,ADGRG1,ADIPOR2,AKR1C4,ALDH1A2,ALDH3A2,ALOX5,ALPP,ANKIB1,ANKRD13A,ANLN,ANXA1,APLP1,AQP9,ARHGEF10,ASPA,ATP8B1,AXIN2,BMP4,CAP1,CCN2,CCND1,CCND2,CCNYL1,CCP110,CD44,CDH17,CDKN1B,CDKN2A,CDX1,CLDN2,CPD,CREB3L2,CREB5,CSRP1,CYP3A7,CYP51A1,DBNDD2,DDC,DHRS7,DRAM2,EDN1,EFNB1,EHHADH,ELOVL1,ENC1,ENPP2,ENPP4,ENTPD5,EPCAM,ERBB3,ERBIN,ERF,FA2H,FABP2,FGFR2,FN1,FNTB,FOS,FRMD4A,FTH1,…	1158 (20)
USF1		transcription regulator		0.389	1.13e-05	ABCA1,AKAP12,BAX,CAD,CCNG2,CDK4,CEACAM1,Ces2c,CPT1A,CTSS,FMR1,GPAM,IGF2R,IGFBP3,LDLR,MS4A1,Mt1,P4HA1,PCK1,PDX1,PKLR,POMC,RORC,SERPINE1,SLC19A1,SPEG,SPP1,SYNPO,TGFB1,TP53,TXNIP	342 (7)
PDX1	-1.272	transcription regulator		0.388	1.27e-07	ACE2,ACTB,ANXA2,ATG9A,ATP2A3,BBC3,Calcb,Ccl2,CCND1,CD44,CDO1,CHGB,CKMT1A/CKMT1B,COL1A1,CPT2,CXCL2,ECH1,EDEM3,EFNA1,EGR1,EIF4EBP1,F3,Gcg,GCH1,GLP1R,GUSB,HAP1,HNF4A,ID3,IER3,IGF1R,IGFBP3,ILK,INSIG1,IRS2,JUN,KLF10,KLF6,KRT8,LTA4H,MAN1A1,MAP2,Mt1,NNAT,NPTX2,NQO1,NR5A2,PAPSS2,PCNA,PDE4B,PDIA6,PDX1,PHGDH,Pmaip1,PPP2R2C,PRSS23,SDHA,SLC2A1,SLC6A6,SPP1,TCF7L2,TSPAN8,TXNIP	1061 (20)
MNT		transcription regulator		0.378	9.55e-06	BCL6,CAD,CCND2,CCNG2,CDK4,E2F2,GADD45B,KLF10,KLF6,NCL,TNF,TXNIP
POU2F1		transcription regulator		0.376	0.000492	Aldh1a7,AOX1,APEX1,BBC3,BCL6,CCND1,CD55,CDO1,CDX2,CYP2C9,CYP2J2,ELK3,FRRS1,GADD45A,GSTK1,GSTM1,GSTM5,Gstt1,HOMER3,ICAM1,LY6E,OLR1,PDE9A,PDRG1,PRKAA2,RDM1,RELA,RPE65,SAA1,SELENOP,SPP1,TIMP3,TMPRSS2,TNFRSF10A,VCAM1,VIP	854 (7)
SP4		transcription regulator		0.375	0.00598	CCL28,CCND1,CDKN1B,CXCL3,FLT1,IGF1R,IL15,IL18,IL1RN,IL23A,IL34,IL7,PRKCD,RELA,TNFSF15,VEGFA	427 (7)
BRD7		transcription regulator		0.365	2.2e-05	BAX,BBC3,FN1,KRT8,MDM2,NDRG1,PIDD1,PYCARD,RAD51,SERPINE1,VCAN,VIM,ZMAT3	1188 (20)
HOXD3	0.902	transcription regulator		0.351	0.00343	CDKN2A,COL1A1,DSG1,DSP,IGFBP3,ITGA5,SERPINE1,TGFBI,THBS1
BMI1		transcription regulator		0.259	0.00103	AURKA,BNIP3,BTG2,CD63,CDC14A,CDKN1B,CDKN2A,DLC1,GLIPR1,HK2,ID4,KIF1B,MCM3,NID1,P4HA1,PARP9,RASSF5,RASSF9,RRM1,SELENON,TP53,VIM	1218 (19)
EBF1		transcription regulator		0.245	0.0483	ACACB,ADCY3,AKT3,BCL6,CCL5,CEBPB,CHUK,COL1A1,CSF2,CXCL10,EIF4EBP1,HK2,IL36B,IRF1,IRF7,IRS1,KRAS,LEF1,Ly6a (includes others),MAP2K1,PCK2,PFKP,PPARG,PPP1CB,PRKAA1,PRKAA2,PRKAR2A,PRKAR2B,SFRP2,SHC4,SLC2A4,SOS2,TCF3,TLR2
NCOA1	-0.459	transcription regulator		0.243	0.00044	ABCA1,ABCB11,AHR,ALDOA,BGLAP,BPGM,BTG2,C3,Calm1 (includes others),CASP7,CCND1,CYP11A1,CYP2C9,DGKQ,DIO1,EGR1,ERBB3,FGFR2,FOS,GJB2,GYG1,HAS2,HIC1,HNF1A,IL1RN,ILK,LYZ,MAPK3,MTHFSD,Muc1,NADK,OLR1,PCK1,PKLR,PLCD1,PPARG,RB1,SERPINE1,SLC2A1,SORBS1,STAG2,STRN	1436 (21)
ATF5		transcription regulator		0.243	0.0173	EIF4EBP1,PLAT,Pmaip1,SAA1,TXNIP
NFATC1		transcription regulator		0.241	0.0136	Acp5,AHR,BCL2,CCND1,CCND2,CCR9,CD40,CDK4,CDKN1B,COL1A1,CSF2,CYP1B1,EDN1,EGR3,FCER2,HNF1A,HNF4A,ICAM1,IL33,NOX4,NQO1,PDX1,PLS3,PPARG,RORC,SPP1,TNF,VCAM1
SIM1		transcription regulator		0.234	0.0139	ABCG1,ADAM28,ANGPTL4,AOX1,ARNT2,CCR1,Cd52,CDH3,CLCN1,COPZ2,CYBA,DLL1,EGR1,ELK4,FKBP3,FNBP1,Gcg,GLUL,GSTA3,GUCY2C,HLA-A,ICAM1,IFI16,IGFBP4,JAK2,KCNQ1,LAMB3,LCP1,LIFR,LTF,MCM7,MDM4,MYCL,NDUFA1,NUDC,PDLIM4,POLD4,POMC,ROBO3,RYR2,SELENBP1,SLC17A1,SNN,Sp100,SPRR1A,ST6GALNAC6,STRN,TNF,WNT7B,ZG16
CBX5		transcription regulator		0.234	1.86e-11	ABCB1,ALDH3A1,ASCL2,AXIN2,BCL11A,C15orf48,CDH17,CEACAM1,CEMIP,CPA4,CYP1B1,CYP2J2,FGFBP1,FOXQ1,GASK1B,GCNT3,ITGA7,KIT,KRT20,KRT80,LAMB3,LCN2,LEF1,LTB,MAL2,MMP7,MUC13,MUC20,OAS1,OLR1,PODXL2,PPARG,PPFIBP2,PRSS23,PSMB8,PTK6,RIN2,RORA,RUNX2,SBSPON,SELENBP1,SH3GL2,SYTL2,TACSTD2,TCEAL1,TGFBI,TLE4,TM4SF1,TRIM31,TSPAN8,TXNIP
MYF6		transcription regulator		0.23	7.74e-05	ACACB,ANGPTL4,BDNF,Ccl2,CCL28,CTSH,CXCL10,DLL1,ERFE,FST,GDF11,IGFBP3,IL15,IL1RN,IL23A,IL33,IL7,INHBA,LIF,LTF,METRNL,MMP7,NAMPT,Nrg1,PDGFA,PDGFB,RECK,SERPINE1,SPP1,TGFB1,THBS1,TNF,TNFRSF10A,TNFRSF11B,VEGFA	494 (7)
JUND		transcription regulator		0.222	0.000113	AGTR1,ALAS1,BDNF,BGLAP,C3,CCL5,Ccl7,CCND1,CDKN2A,CLU,CSTA,CXCL10,F3,FTH1,HPGD,IKZF2,MMP7,MMP9,NOX4,NR4A1,PLAU,RUNX2,SERPINB9,SFTPD,SOX4,SPP1,TNF,VEGFA	1306 (19)
HLX		transcription regulator		0.217	0.000144	ANKRD1,BMP2,CCNB1,Cd24a,CD44,CDKN2A,CTSS,CYP1B1,EGR1,GDF15,ICAM1,JUN,PLXNA1,RB1,UNC5B	390 (7)
YBX1		transcription regulator		0.189	0.0033	ABCB1,Ccl2,CCL5,CDC34,CDKN2A,COL1A1,CSF2,CXCL2,CYP11A1,EFEMP1,ERBB2,F3,FOS,HES2,IGFBP3,INHA,KLF4,MVP,MYCL,PDGFB,PDK1,PLXNA2,RIN1,S100A13,SP3,STC2,TGFB1,TP53	1512 (21)
EPAS1		transcription regulator		0.176	2.55e-14	ABCG2,AKAP12,ALDOC,ANGPTL4,ARG1,AXL,BBC3,BCL2,BNIP3,CA12,CA9,Calm1 (includes others),CCN1,CCN2,CCND1,CDC42EP5,CDCP1,CEBPB,CEMIP,CITED2,CKMT1A/CKMT1B,CXCL2,CYP51A1,DECR2,DGAT2,DUSP7,EDN1,ENO1,FABP2,FBLN2,FHL1,FLT1,FMO5,FN1,FOS,GADD45B,GAL3ST1,GJA1,GLB1,GYS2,HMGCS1,ICAM1,IGFBP3,IRS2,ITIH5,ITPR1,L1CAM,LDHA,LDLR,LOXL2,MIF,MMP14,MYO7A,NAMPT,NCOA4,NDRG1,NOTCH1,NRARP,NRN1,NT5E,OMA1,P2RY1,PDGFB,PELP1,PLO…	1006 (20)
ARNT2	-0.696	transcription regulator		0.14	0.00371	ABCG1,ADAM28,ANGPTL4,AOX1,ARNT2,CCR1,Cd52,CDH3,CLCN1,COPZ2,CYBA,DLL1,EGR1,ELK4,FKBP3,FNBP1,Gcg,GLUL,GSTA3,GUCY2C,HLA-A,ICAM1,IFI16,IGFBP4,JAK2,KCNQ1,LAMB3,LCP1,LIFR,LTF,MCM7,MDM4,MYCL,NDUFA1,NUDC,PDLIM4,PGK1,POLD4,RYR2,SELENBP1,SLC17A1,SLC2A1,SNN,Sp100,SPRR1A,ST6GALNAC6,STRN,TNF,VEGFA,WNT7B,ZG16
CEBPA		transcription regulator		0.098	1.83e-05	ABCB1,ADCY7,ADH1C,AGPAT2,AKAP12,ANXA1,APOB,ARG1,ARL4C,ASS1,BCL2,BIK,BTG2,C3,CCNA2,CCND1,CCND2,CCR1,CD14,CDK4,CEBPB,CKAP4,COL1A1,CPT1A,CSF1,CYCS,CYP11A1,CYP2C9,CYP3A7,DGAT2,DHCR7,EDF1,EPHX1,EVPL,FHL1,FLT1,FOS,FOXA2,FOXM1,FOXO3,GADD45A,GAPDH,GCH1,GGH,GJA1,GLIPR1,GSTP1,HAS2,HMGCR,HNF1A,HPGD,ICAM1,IER3,IGFBP3,IGFBP4,IL1RN,IRS1,IRS2,ISG15,ITGB5,JUN,KLF4,KLF5,KRT27,LCN2,LGALS1,LTF,Ly6a (includes others…	1376 (20)
FOXA3	0.402	transcription regulator		0.097	0.0105	ACADM,CD40,CPT1A,CYCS,CYP2C18,CYP2C9,CYP3A7,FOXA2,PCK1,SLC27A1,Sp100,TAT,TF
CREB1		transcription regulator		0.094	3.37e-11	ABCA1,ACVR2A,ADORA2A,AK4,AKAP13,AKT3,ALAS1,ANGPTL2,APOLD1,AQP11,ARG1,ARHGAP33,ATP1A1,ATP6V0D1,AURKA,BCL2,BCL2L1,BDNF,BNIP3,BRINP2,BTG2,CACNA2D1,CADPS2,CAMK4,CAMKK2,CAMKV,CAPN5,CCN1,CCNA2,CCNB1,CCND1,CDA,CDH13,CDH2,CDK14,CEBPB,CHGB,CLMP,CPD,CPT1A,CRYM,CXCL2,CYP11A1,CYP51A1,DGKA,DKK2,DMBT1,DOK4,EDN1,EGR1,ETV3,ETV6,FABP2,FGF19,FGFR2,FGL2,FLT1,FN1,FOS,FOSB,FOXO3,FRMD6,GABARAP,GAD1,GADD45A,GADD45B,GDF…	1453 (22)
CUX1		transcription regulator		0.089	0.00488	ARHGAP32,CAD,CCL5,CCNA2,CDH2,CDKN1B,CXCL10,CXCL2,CXCL3,CXCL6,ECT2,ERBB2,FLNA,LTF,POLA1,RACGAP1,RHOBTB3,THBS1,VIM,WNT10A	500 (7)
SMARCA5		transcription regulator		0.043	9.16e-13	AEN,AHR,ALDH1B1,ANKRD6,ARMCX1,ASS1,BAX,BCL6,CAMK4,CASP1,CCND2,CD44,CD81,CORO2A,CRIP1,ENC1,FKBP5,FUCA1,GM2A,GPRC5B,GRIA3,H2-T22,HLA-A,IFITM2,IGFBP4,IRF7,KBTBD11,KIT,KLF7,LFNG,Ly6a (includes others),NINJ1,NOTCH1,PADI4,PHLDA3,PLAC8,PLCG2,PLK2,Pmaip1,PRSS57,RASGRP4,RPS6KA2,RRAD,RTP4,SAC3D1,SEMA4A,SERPINB1,SMOC1,SNX10,SYNGR1,TCF7L2,TDRD5,Tgtp1/Tgtp2,TMEM176B,ZMAT3,ZNF442,ZNF616	530 (7)
RBPJ		transcription regulator		0.042	0.000509	AXIN2,BMP2,BMP3,CCND1,CD44,CDKN1B,Cdkn1c,CDKN2A,CSF1,CSF2,CYP11A1,DLL1,ECT2,ETS1,FGF11,FOS,FOXN1,HAS2,HMMR,HOXD3,IL18,IL36B,INHA,INHBA,JUN,LEF1,LFNG,LIF,NGF,NRARP,PDGFB,PIK3CG,POGLUT1,PRKAR2A,PRSS3,RORC,SLC2A1,SOX4,SOX9,TGFB2,TGFB3,TNC,VEGFA,VEGFD	1046 (20)
PAX5		transcription regulator		0.042	0.021	BCL2,BCL2L1,BIK,CCND1,CD40,CDKN1B,FCER2,FN1,HK2,MSN,NR3C1,PYGL,SLC2A1,SLC2A6,TP53,TXNIP,VIM
MAX	-0.323	transcription regulator		0.038	2.48e-06	APEX1,AR,BAX,BCL6,CAD,CCNB1,CCND2,CCNG2,CDK4,CDKN1B,CYCS,DKC1,DUSP7,E2F2,EDN1,FADS2,FTH1,GADD45A,GADD45B,HDAC2,HK2,KLF10,KLF6,MTHFD1,NCL,NPM1,PDGFRB,PDK1,RBBP8,SERINC3,SLC2A1,TNNT2,TXNIP,UBE2C,WRN	707 (7)
ZBTB7A	-0.316	transcription regulator		0.028	0.00276	ADA,BBC3,BCL2L11,BID,CASP9,CDKN2A,DMBT1,FOS,MDM2,NRP1,PFKP,RBL1,RELA	1202 (21)
SATB2	-0.914	transcription regulator		0	0.0193	BAX,BBC3,CDH3,CXCL10,E2F5,EFEMP1,FLVCR2,IFI44,KRT8,MDM2,NOX4,PDE3A,PLXNA2,SLAIN1,SPP1,UPF3B
JUNB		transcription regulator		0	0.00406	AGTR1,ARNTL2,BDNF,C3,Ccl7,CCND1,CD44,CDC20,CDKN1B,CDKN2A,CLU,COL1A1,CSF2,CXCL2,CXCL3,CYP1B1,EEF2,FBLN2,FN1,FTH1,HK2,HPGD,IFI16,IKZF2,INHBA,LAMB3,LCN2,LPAR1,MMP9,NAMPT,PAK3,PLAU,POMC,RUNX2,SERPINE1,SFTPD,SLC7A1,SLC8A1,TIMP3,TNF	1325 (16)
TWIST2		transcription regulator		-0.059	0.00288	BCL11A,CCND1,CD44,CDH2,FN1,KLF6,MAF,MGST3,MMP9,RNF43,TGFB1,TNF,VIM,ZEB1	936 (16)
IKZF1		transcription regulator		-0.068	9.65e-07	ACP1,ANTXR1,AXL,BCL2L1,BCL6,BCL9L,C1QTNF1,CCND2,CCR1,CD38,CDKN1B,CITED2,CTNND1,CXCL2,CYP2J2,DNAJC6,DOCK4,DOK4,EIF2AK3,EMP1,FN1,FUT10,HK2,IFI16,IFIT3,IL18R1,IL6ST,JADE2,KIF16B,KIF23,KIT,KLF4,LHFPL2,LHFPL6,LRP1,MAP2,MMP14,MYO1B,NOTCH1,NOTCH3,NR1H4,NR3C1,NRARP,P2RX4,POMC,PPP1R2,PPP1R9A,PREP,PROS1,PYGL,RAPGEF4,RHBDF2,RNF213,RTP4,S100A16,SASH1,SELENOM,SEMA5A,SLC19A1,SLC27A3,SLC2A1,SLC2A6,SOX9,SPPL2A,S…	1034 (15)
DACH1	0.569	transcription regulator		-0.078	0.00634	BMP4,CXCL3,EFEMP1,EGR1,FOS,IGFBP3,JUN,KLF4,PAK3,PLAT,RAD51,SERPINE1,STC2,TGFB1	1449 (20)
STAT5B		transcription regulator		-0.079	3.65e-05	ABCB1,Acnat1/Acnat2,Acot1,ACOT11,ACOT4,AGPAT2,AHNAK,ALDH3A2,ANKRD1,AR,ASAP1,BAX,BCL2,BCL2L1,BCL6,C11orf95,CASP9,CBR1,CCDC141,CCND1,CCND2,Cdkn1c,CDO1,CISH,COX7A1,CYP2C9,Cyp2d9 (includes others),DDC,DGAT2,FAM89A,FMO2,FOS,GADD45A,GADD45B,GJB1,GSTP1,HAO2,IRF1,KRT19,KSR1,LAMA3,LTB,MAF,MDM2,MTMR11,Mup1 (includes others),MYL7,NIPAL1,NOX4,NQO1,NR4A2,NRP2,NT5E,NUDT7,PDK4,PDZRN3,PMM1,PPME1,PROM1,RABIF,RELA…	1045 (14)
STAT5A		transcription regulator		-0.081	5.86e-10	ABCA1,ABCB1,ABCG1,ALDH3A1,AR,ASCL2,AXIN2,BAX,BCL11A,BCL2,BCL2L1,BCL6,C15orf48,CASP9,Ccl2,CCND1,CCND2,CDH17,CDK4,CDKN1B,CEACAM1,CEBPB,CEMIP,CISH,CPA4,CYP1B1,CYP2J2,FGFBP1,FOS,FOSB,FOXQ1,GADD45A,GASK1B,GCNT3,GJB1,GYS2,GZMM,ICAM1,IFITM2,IL6ST,IRF1,KIT,KLF10,KRT20,KRT80,KSR1,LAMB3,LCN2,LEF1,LTB,MAF,MAL2,MDM2,MMP7,MUC13,MUC20,NR4A2,OAS1,OLR1,PODXL2,PPARG,PPFIBP2,Prl2c2 (includes others),PRSS23,PSMB8,P…	1131 (18)
ARID3B		transcription regulator		-0.087	0.0336	BCL2L11,CASP7,TNF,TRADD
FOS	-0.275	transcription regulator		-0.092	4.04e-22	4930486L24Rik,ABCB1,ACOX1,Acp5,ADAM12,AGTR1,ALAS1,ALPP,AMIGO1,ARID3A,ARNTL2,ARPC5,ASAP1,B4GALT1,BCAR3,BCL2L11,BDNF,BGLAP,C3,CAMK2D,CAST,CASZ1,CCL5,Ccl7,CCN2,CCNA2,CCND1,CD14,CD44,CDON,CLDN2,CLIP1,CLU,CMTM4,COL16A1,COL18A1,COL1A1,CSTA,CTH,CTNND1,CTSH,CXCL10,CXCL3,CYCS,CYP2J2,Defb1,DSG3,EDN1,EEA1,EGR1,EIF4G2,ELOVL6,ELP1,ENAH,ENO1,EPHX2,EPS8,ERCC5,EREG,EVX1,F3,FBLIM1,FLRT2,FMN1,FN1,FOS,FOSB,FOXO3,FT…	1337 (17)
ING1		transcription regulator		-0.108	0.00372	ANGPTL4,BAX,CCL5,CCNB1,CDKN2A,EID1,JAK2,MDM2,SERTAD4,SPP1,Tnfrsf22/Tnfrsf23,TP53,TPPP	1206 (24)
PAX7		transcription regulator		-0.111	1.28e-05	ABCA1,AHR,ASS1,Cd24a,CDH2,CNTFR,DEPTOR,FAM107B,FRK,GALNT13,GCH1,HMGN1,ID3,IL13RA1,LMBRD1,MYO1D,NPNT,NQO1,PARM1,PDLIM4,PKIA,PLAGL1,PPARG,PRSS23,RNF128,SEMA3E,SLC44A1,SYNE2
MED13	-0.366	transcription regulator		-0.128	0.00295	ANKRD1,BPGM,CIDEC,ELOVL6,ENO1,HMGCR,KRR1,LIF,NR4A2,PKLR,PPARG,PRKAR2B,PYGL,Sik1,SLC2A4,TMEM45B	620 (3)
NCOA3	-0.244	transcription regulator		-0.149	1.53e-05	AHR,ANKRD1,BCL2,CCDC80,CCN1,CCN2,CCNA2,CCNB1,CCND1,ERBB2,FGFR2,GJB2,HK2,IGF1R,IGFBP3,ILK,IRF1,IRS1,KAT2A,LDHA,MCM7,MMP9,Muc1,NCOA3,PCNA,PGK1,PPARG,SLC16A3,SLC2A1,TGFB2,VEGFA,XDH	1650 (20)
ZBTB17		transcription regulator		-0.156	6.36e-06	ANLN,BCL2,CCNA2,CCNB1,CCND1,CDC20,CKAP2,ECT2,EDA2R,EGR1,FOXM1,HMMR,IER3,IQGAP3,JUN,KDM8,KIF18B,KIF20A,KIT,LDLR,NCAPH,NEK2,NUF2,PBK,PIMREG,PLK1,PRC1,PSRC1,RACGAP1,TOP2A,UBE2C	1243 (21)
TCF7L1		transcription regulator		-0.17	0.00102	AXIN2,CCND2,FOXA2,GPA33,JUN,KIT,KLF4,NR5A2,PPARG,PYCR2,SLC26A2,STMN2,TNFRSF19	1286 (15)
VHL		transcription regulator		-0.177	1.88e-08	ADGRG1,ALDH1A1,AURKA,BBC3,BCL2,BCL2L1,BCL2L11,BNIP3,CA12,CA9,CCN2,CCND1,CDCP1,CDH2,CDKN1B,CLDN4,CLTC,CPT2,DUOX2,F3,FN1,FTH1,FTL,GAL3ST1,GLCE,HNF1A,HYAL1,IER3,IGF1R,INSIG2,ITGA5,LOXL2,MAF,MIF,MMP14,NOC2L,NOX4,PCNA,PDGFB,PTHLH,RHOF,RPS6,SLC16A3,SLC2A1,SLC40A1,TNF,TP53,TYMS,VCAM1,VEGFA,VIM	1257 (21)
SOX17		transcription regulator		-0.183	0.00833	AXIN2,CCND1,COL4A1,COL4A2,FGF3,FOS,FOXA2,GPT,HNF4A,LAMB1,PROM1,Rhox5	1064 (11)
MAF	0.727	transcription regulator		-0.192	0.0177	ACSS2,CRYAB,CYP51A1,DEPTOR,FDFT1,Gcg,HMGCR,IL1R1,LSS,MAF,NQO1,NT5E,NUAK1,PMVK,RORC,SQLE,TP53,TXN,VCAM1
GFI1		transcription regulator		-0.219	0.00868	ANXA6,BAK1,BAX,BBC3,CASP1,Ccl2,CCND2,CCR10,CD40,CDKN1B,CSF1,E2F5,E2F6,ETS1,F2R,GJA1,GUSB,HPRT1,HSP90AB1,ICAM1,IL1R1,IRF1,JUN,LPAR1,Ly6a (includes others),LYZ,MAPK3,MMP7,NT5E,Pmaip1,RAPGEF4,RASL11B,RB1,RELA,TBK1,TNF,TRADD,VDR	914 (13)
EHF		transcription regulator		-0.253	0.032	ALOX5,ANGPTL4,BMP4,CDH3,CDKN1B,CDKN2A,CSF2,ERBB2,EREG,FOXN1,GLB1,HOPX,IL1RN,KIT,KLF5,NOTCH3,PLAT,SAA1,SCEL,SERPINE1,TFPI,TGFB1,TNC,VEGFA
ONECUT2	-1.638	transcription regulator		-0.254	0.0336	AR,BASP1,FOXA2,NAT1
HEXIM1		transcription regulator		-0.255	0.00154	ACE2,ANXA1,BBC3,CCND1,COL1A1,LOXL2,SLC2A1,TGFB2,Tmsb4x (includes others),TP53,VIM	1272 (23)
SQSTM1		transcription regulator		-0.256	4.61e-06	ARID5A,Ccl7,CITED2,CKAP4,CXCL10,CXCL2,EDN1,FGL2,GCLC,GSTM5,IL15,IL18,IRF1,ISG15,JUN,KEAP1,NQO1,PLAT,PLK2,RELA,TNF,UGDH,USP12	783 (16)
E2F8		transcription regulator		-0.271	0.00152	CCNA2,CCNB1,CCND1,ECT2,KIF23,MCM2,RACGAP1
NAB2	0.344	transcription regulator		-0.272	0.000743	F3,FLT1,FN1,FOS,ID4,NAB2,PLAU,PPARG,RRAD,TGFB1	1248 (19)
IRF4		transcription regulator		-0.286	0.000382	Acp5,ADA,AP3M2,ARG1,BCL6,BNIP3,Ccl2,CCNB1,CDC14A,CDKN2A,CSF2,CTSS,CXCL10,CXCL3,DBI,DOCK8,ERBB3,FCER2,FLT1,IKZF2,IL18RAP,IL1R1,IL1RN,IL33,IRF1,IRF7,ISG15,JAK2,LEF1,LYST,MS4A1,OAS1,PCNA,PHF11,PLSCR1,PRKCA,PROCR,RAC1,RAD51,RORA,RORC,RPL6,RUNX2,SLC2A1,SPP1,STAG2,STAT2,STK17B,TNF,TNFSF13B,XRCC1	973 (17)
TP73		transcription regulator		-0.288	5.41e-14	4930486L24Rik,ABCB1,ADA,ADORA2B,AEN,ANGPTL4,AURKA,BAK1,BAX,BBC3,BCL2,BCL2L11,BID,BRAF,BTG2,C3,CASP1,Ccl2,CCN1,CCNA2,CCNB1,CCNF,CCNG2,CD55,CDC20,CDC42EP2,CDKN1B,Cdkn1c,CITED1,CLEC7A,CLMN,CNN3,CNTFR,COL18A1,COL1A1,CRYAB,CTH,CXCL10,CXCL2,CXCL3,DRAM1,DTYMK,EDN1,EGR1,ERCC5,EREG,FEN1,FGFR2,FLT1,FN1,FOXJ1,FOXO3,FST,GADD45A,GLS2,GPR137B,GTSE1,HIC1,HTATIP2,IDH2,IER3,IGFBP3,IGFBP4,IL7,ITGA5,JAG2,KCNJ4,KCNQ…	1208 (19)
HDAC2	0.316	transcription regulator		-0.293	0.000131	ALOX5,APEX1,ASCL2,AURKA,BBC3,BCL6,CAVIN2,CCNG2,CDKN1B,CDKN2A,COMMD3-BMI1,EGR1,F3,FABP2,FAM107A,FCER2,FOXM1,GABARAPL1,ITGB8,LCE3C,LGR5,MCM3,MCM5,MCM7,MDM2,MMP9,Mt2,NR3C1,PAX8,PDGFB,PLAU,PREX1,RORC,SLC35D1,SLC8A1,SOX11,SOX9,Sprr2h,STMN2,TNF,TNFRSF19,TP53,TPD52	1233 (23)
IKZF2	-0.394	transcription regulator		-0.302	0.0411	Cd52,CSF2,HLA-E,ICAM1,IL1R1,IRF1,IRF7,KLF7,Ly6a (includes others),NR4A1,TNFRSF18
STAT2	-0.832	transcription regulator		-0.316	0.000227	BCL2,Ccl2,CCL5,CD40,CXCL10,IFI35,Ifi47,IFIT1,IFIT1B,IFIT2,IFIT3,IFITM2,IRF1,IRF7,ISG15,OAS1,OAS2,Oasl2,PSMB8,RTP4,TNF,ZBP1	805 (16)
NFYA		transcription regulator		-0.316	9.49e-07	ABCB1,BBC3,BCL2,BIK,CCNA2,CCNB1,CHEK2,COMMD3-BMI1,EGR1,EPHX1,FGFR2,FTH1,GADD45A,GADD45B,GPAM,HSD17B7,ICAM1,IRF1,JUN,LMAN1,NOTCH1,PADI4,PCK1,PDGFRB,PGK1,PIDD1,POLA1,RGS4,RRM2,Scd2,THOP1,TOP2A,TXNIP,UBE2I	1309 (20)
TRPS1		transcription regulator		-0.318	0.00913	BGLAP,BMP2,BUB1,CCNA2,CDC20,FN1,FOXM1,GALNT3,GREB1,RAMP1,RUNX2,SEMA6A,TGFB2,TOP2A,VDR,ZEB1	1208 (13)
TSC22D3		transcription regulator		-0.32	0.00913	ANXA1,BBC3,BCL2,BCL2L11,BGLAP,CCL5,CCND1,CDKN1B,COL1A1,EGR3,ICAM1,PPARG,RUNX2,TLR2,TNF,TP53	1150 (18)
NFATC4		transcription regulator		-0.323	0.0234	Acp5,ADSS2,APP,BDNF,CDKN1B,COL1A1,ITPR1,PPARG,SPP1,TNF
HDAC1		transcription regulator		-0.328	3.77e-07	ABCB1,Acp5,AGTR1,AKAP12,APEX1,AR,ASCL2,AXIN2,BAX,BBC3,BCL6,BDNF,CAVIN2,CCL5,CCNA2,CCNB1,CCND1,CCND2,CD1D,CD44,CDKN1B,CDKN2A,CEACAM1,COL1A1,COMMD3-BMI1,E2F2,EGR1,FABP2,FAM107A,FGFBP1,FLT1,FN1,FOS,FOXM1,GABARAPL1,GLUL,GSTP1,INA,LCE3C,LCN2,LGR5,MCM3,MCM5,MCM7,MDM2,Meis1,MMP9,Mt1,Mt2,NCL,NEFH,Nefm,Nes,PAX8,PCK1,PCYT1A,PDGFA,PDGFB,PLAU,PLK1,PPARG,PPP2R2B,PREX1,RBL1,RECK,RORC,RRM2,RUNX2,SERPINE1,SLC35D…	1224 (24)
POU5F1		transcription regulator		-0.34	2.02e-06	ACKR3,ACVR2A,ADORA2A,AHR,ALDOC,BAK1,BAX,BCL2,BCL2L11,BID,BIK,BIRC6,BMP2,BMP4,BMPER,BNIP2,BNIP3,BNIP3L,BRAF,CASP1,CASP14,CASP7,CCL5,CCND1,CCNF,CD40,CD63,CDH2,CDX2,CIDEB,CITED1,CLDN7,CXCL10,CXCL3,DNMT3B,DSP,EFEMP1,ENO1,EPCAM,EVPL,EVX1,FABP2,FOXA2,FUCA1,GADD45A,GLB1,GM2A,GPI,GREB1,HK2,HOPX,ID3,IER5L,IGF1R,IL6ST,INHBA,IRS1,KDM2B,KIF16B,KLF4,KRT27,LDHA,MAX,Meis1,MMP9,NAIP,NR2F2,NRP1,Oasl2,OVOL1,PARP1,…	1360 (20)
HOXA10		transcription regulator		-0.351	9.69e-07	ACTA1,ACTB,AIMP2,ALDH1A1,ALDH1A2,ALPP,ARL4A,ATP1A2,BCHE,BCL2L11,Cdkn1c,CSTA,DHRS9,ENPP2,FKBP3,FLT1,FN1,FST,FZD5,GJA1,GSTA3,Gstt1,HMGCR,HSP90AA1,IDH2,IGFBP3,IL1R1,KLF10,KRT4,LCN2,LTF,LYZ,MAP1B,MAX,Meis1,MICOS10-NBL1/NBL1,MSN,NDRG2,NR4A1,PHGDH,PPP1R13L,PRKCD,PROM1,PROS1,RELA,RNASE4,RP2,Scd2,SCOC,SLC27A1,SLC27A6,SSPN,ST6GAL1,STK17B,TNFSF13B,TP53,XDH,ZNF22
HOXA11		transcription regulator		-0.351	0.0051	ANXA1,BGLAP,CDKN1B,COL1A1,ERF,FOXD1,PDGFA,RUNX2,SPP1
SOX2		transcription regulator		-0.381	2.59e-13	A930009A15Rik,ABCC3,ABCG2,ACKR3,ACVR2A,ADAMTS4,ADORA2A,AHR,ALDH1A1,ALOX5,AMOT,ARHGEF10,ASCL2,AXIN2,BCAS1,BCL2L1,BCL9L,BGLAP,BMP4,BMP6,BMPER,CCL5,CCN2,CCND1,CD44,CDH2,CDKN1B,CDKN2A,CDX2,CHST3,CITED1,CITED2,CLDN7,COL1A1,COMMD3-BMI1,CREB3L2,CXCL10,CXCL3,CYP2J2,DDC,DLL1,DNM2,DNMT3B,DSP,EFEMP1,ELF3,ELOVL1,EPB41L2,EPCAM,ETV4,ETV5,EVPL,EVX1,FA2H,FABP2,FAM107B,FGF3,FLT1,FOS,FOXA2,FST,GADD45B,GAL3ST1,GJA1…	1371 (21)
CEBPE		transcription regulator		-0.405	0.0104	BCL2,BCL2L1,Ccl7,CCND2,CD14,CDK4,CDKN1B,CEBPB,IL18,IL1RN,LCN2,LTF,LYZ,MMP9,RNASE2,TNF,TNFSF13B
TGFB1I1		transcription regulator		-0.416	0.00408	AR,CDKN1B,FN1,FOS,KLF4,KRT19,KRT20,LTBP2,NOX4,SERPINE1	1194 (22)
STAT4		transcription regulator		-0.421	2.33e-09	ACP6,ADSS2,AHNAK,ALDOC,AP2A2,ARFGAP3,ARMCX1,BCL2,BCL2L1,BCL2L11,C3,CAPN5,CCNI,CDKN1B,CXCL10,CXCL2,CXCL3,DDAH2,ENTPD4,ETV5,FSCN1,FYB1,GJA1,HES6,IER3,IFIH1,IFIT1B,IFIT2,IL18R1,IL18RAP,IRF1,ISG15,ITGA7,ITIH5,JAG2,KDELR2,LRP1,LTBP3,MAGED1,MAP3K8,MBOAT2,Mt1,MTHFS,NDRG1,P4HA2,PDK1,PEX13,PGP,PKP2,PLAC8,PLOD2,POLD4,PPP1R13L,PRDX6,PYGL,RAMP1,RASL12,RGS16,RNF128,RORA,RRAD,SELENBP1,SERPINB1,SERPINE1,SETD5,S…	898 (16)
MDM2	0.644	transcription regulator		-0.423	6.87e-05	BAX,BBC3,BCL2,CCNA2,CCND1,CDK4,CDKN1B,CDKN2A,EDA2R,ELF4,ETS1,FCGRT,FOXO3,GTSE1,IGF1R,IL1RN,LRMDA,LYZ,MDM2,MDM4,NDUFA1,POLK,PSRC1,RABAC1,RELA,SERPINE1,THBS1,TOP2A,TP53,ZNF365	1153 (19)
NEUROG1		transcription regulator		-0.447	0.00488	ASS1,C3,CAVIN2,CCND2,CEMIP,DSP,FAP,FN1,GASK1B,HAS2,INHBA,LCP1,LGR5,MMP9,P4HA2,PLK2,PPIC,RIPOR2,SQOR,THBS1
PIAS4		transcription regulator		-0.447	0.0309	CXCL2,IRF1,ITGB8,LEF1,PDK4,SERPINE1
WT1		transcription regulator		-0.45	1.14e-05	ACTN1,BAK1,BCL2,BCL2L1,BTG2,CCN2,CCND1,CLIC4,CMPK1,COL4A1,CSF1,CSF2,CXCL10,CXCL3,EFNA1,EGR1,ELK4,EPS8,ERBB2,EREG,ETS1,FDFT1,FOSB,HSPG2,IFRD2,IGF1R,IL1RN,IL23A,INHA,ITGB1BP1,KLF4,KRAS,LGALS3,LMAN1,LRP1,LSS,MDM2,MED13,MGST1,MMP14,MMP9,MPP1,MYL6,NDRG1,NOTCH3,NR4A2,NRAP,PCK2,PDGFA,PIR,Ptma (includes others),RALGPS2,SALL2,Scd2,Serpinb9b,SERPINE1,SLC6A6,SOX9,SPRY1,SQLE,ST6GAL1,STIM1,TCOF1,TGFB1,TGFB3,T…	1376 (23)
HDAC9		transcription regulator		-0.478	0.0309	BAX,BCL2,CCNB1,JUN,NR4A1,RGS2,SLC2A4,SMARCA2,Usp17la (includes others)
SP2		transcription regulator		-0.502	0.00151	BGLAP,CCND1,CEACAM1,FOS,PCYT1A,PRKCD,PTGS1,SERPINE1
FOSB	0.976	transcription regulator		-0.516	0.00641	BDNF,CCND1,CEBPB,F3,FOS,FOSB,FTH1,HPGD,INHBA,MMP9,PPARG,RUNX2,SERPINE1	1389 (21)
HDAC3		transcription regulator		-0.565	0.0033	ACACB,ALOX5,BMP2,CCNB1,CCND1,CD55,CDH2,CDKN1B,CDKN2A,CXCL10,CXCL2,DIO1,E2F2,ELOVL6,ENPP2,FCER2,FOS,GDF11,GPAM,HDAC2,ICAM1,IL18,MMP9,SERPINE1,SMARCA2,SPP1,TNF,VIM	1277 (20)
GATA1		transcription regulator		-0.572	1.6e-07	ABCA2,ABCB10,ACTN1,ALOX5,BACH2,BCL2,BCL2L1,BCL2L11,BMP6,BTG2,BZW2,CA1,CCL5,CCND1,CCND2,CCR1,CCR3,CDK4,CDKN1B,CDKN2A,Clca3a1/Clca3a2,CMA1,CNN3,CPD,DUT,EGR1,ETS1,FHL1,FOSB,FYB1,Gar1,GART,HHEX,IL6ST,INHA,ITGA6,KIT,LMO4,LYZ,MAGED1,MAMDC2,MCM3,MCM5,MECOM,Meis1,MGST2,MS4A1,MSH2,MTHFD1,NAB2,NCL,NCOA7,NEFH,NHP2,NOP2,NR4A2,NRARP,PCNA,PHC1,PLXNA1,PLXNA2,POLD1,PSTPIP2,RBL1,RNASE2,RPL27A,RRM1,RUNX2,SASH1,SCI…	1307 (23)
GRHL2		transcription regulator		-0.578	0.00256	BCL2,BMP2,CLDN4,ERBB3,IL7,MMP14,NOTCH3,NRP2,RFX2,SEMA3B,TGM1,ZEB1	859 (5)
MYRF	1.282	transcription regulator		-0.579	0.000798	4930486L24Rik,AMOTL2,ANXA6,AQP9,ARHGEF25,BCL2L11,CCN2,CEACAM1,CFI,CHMP4C,GDF15,GRB14,KLHL21,MFSD1,PDK4,RASSF6,S100A1,SELENOI,SLC22A4,TENT5A,TNFRSF21,ZAN,ZNF362
TAF4		transcription regulator		-0.632	1.1e-06	AR,BCL2L1,BCL6,BDNF,BRAF,CCN2,CCND1,CDH3,E2F2,ETS1,FOXA2,GJB2,HOPX,IFIT1B,IL1RN,ITGA6,KLF4,KLF5,LRRC15,MAP4K4,MXD1,OAS1,PBK,PDGFA,PDGFC,SFRP2,SPP1,SPRR1A,Tchh,TGFB1,TGFB3,TGM1,TGM3,THBS1,VEGFD,WNT9A
SATB1		transcription regulator		-0.675	0.0367	ACTN1,ADCY3,BCL2,CCND1,CD40,CEACAM1,CORO6,CSF2,ETS1,FAM110A,FOSB,GADD45B,GDF15,HELZ2,HLA-DMB,HSP90AA1,ID3,IL18RAP,IL7,ILF3,IRF7,LPIN2,MAF,MAL,Meis1,MYCL,NCOR1,NR4A2,PIK3IP1,RB1,RIPOR2,SUN2,TNF,TNFSF13B,TUBA4A,UBE2L6,UHRF1,VIM
RNF2		transcription regulator		-0.676	0.00861	CCND2,CDC14A,CDKN1B,CDKN2A,CDX2,COMMD3-BMI1,FGF3,FOXA2,GDF15,HNF4A,MCC,MCM3,PHC1,PHC2,REC8,STAMBP,TP53	1048 (12)
NFE2L2		transcription regulator		-0.692	2.31e-08	ABCB11,ABCC2,ABCC3,ABCG2,ACE,ACE2,Acp5,AHR,ALAS1,ALDH3A1,ALDOA,AOX1,ARHGEF3,ATP1A1,BCL2,BCL2L1,BDNF,BGLAP,BNIP3,Calm1 (includes others),CBR1,Ccl2,CCL5,CCN2,CDC34,CHGB,COL1A1,COL4A2,CXCL10,CXCL2,CXCL3,CXCL6,DDX39B,DHCR7,DNAJB5,DSTN,EIF4G2,ENTPD5,EPHB4,EPHX1,ETV6,FKBP5,FMO1,FN1,FOXO3,FTH1,FTL,GABRB1,GCLC,GNA11,GPX2,GSS,GSTA3,GSTA5,GSTM1,GSTM5,GSTP1,Gstt1,HACD3,HAX1,HNF1A,HPRT1,HSD3B1,HSP90AA1,HSP90…	819 (13)
ATF1		transcription regulator		-0.698	0.045	ATP1A1,BCL2,CEBPB,CYP51A1,EGR1,FOS,FTH1,INHBA,JUN,PCNA,THBS1,YWHAZ
SRSF2		transcription regulator		-0.707	0.00381	APP,AURKA,BAAT,CCND1,CES1,COL1A1,EP300,FOXA2,NR1H4,PLK1,RRM2,RYR2,Tmsb4x (includes others),TNFRSF10A,VIM	1116 (16)
XBP1		transcription regulator		-0.708	0.0396	ABCA12,ACACB,APP,ARFGAP3,ASB11,BCL2,Ccl2,CCL5,COG6,COL4A1,COL4A2,CREB3L1,CXCL2,DOLPP1,EDEM1,EIF2AK3,ETS1,FKBP7,FN1,Gkn3,GMPPB,GOLGA4,GOLGB1,GOLPH3L,ICAM1,KDELR2,KLF4,LMAN1,MAN1A1,MOGS,NCOA3,NUCB2,P3H1,PCYT1A,PDIA6,PDX1,PIGA,RABAC1,RELA,Rrbp1,S100A6,SEC23A,SEC24D,SELENOM,SLC1A5,SLC38A1,SRP54,STARD5,TNF,TNFRSF10A,TXN,VCAM1
ELK1		transcription regulator		-0.726	2.18e-05	ANKH,BCL2L1,BMP2,CDKN1B,CDKN2A,EGR1,FOS,FOSB,IL23A,IL7,INSIG2,ITGB6,JUN,KATNB1,MECOM,MMP9,PRKCA,PSMB10,PSMB8,PSMB9,RUNX2,SLC2A1,SPP1,THBS1,TIPARP,TNF,TPD52L1	1560 (23)
ELK4	-0.265	transcription regulator		-0.728	0.0012	CDKN2A,EGR1,EGR3,FOS,IL18,IL23A,IL7,INSIG2,NCOA7,NR4A1	730 (16)
NRF1		transcription regulator		-0.73	0.01	ALAS1,ATP1A1,ATP1B1,CDH2,CYCS,FMR1,FTH1,GCLC,HPCAL4,IL1RN,MOGS,Mt1,NQO1,Pmaip1,PPRC1,SDHA,TOMM20,TP53,VIM,ZEB1
ID3	0.752	transcription regulator		-0.73	1.51e-07	ADGRG1,ADSS2,ASCL2,BCL2,BCL2L1,BCL2L11,BCL6,BTG2,CCL5,CCNB1,CCND2,CCNG2,CCR1,CCR10,CCR9,CD44,CDKN1B,Cdkn1c,CDKN2A,CEBPB,CSF1,DGKA,E2F2,ELOVL6,FOXO3,GADD45B,GNL3,HOMER2,ICAM1,ID3,IFI16,IGFBP4,IKZF2,JAK2,KLF6,KLF7,LGALS1,LMO4,LTB,MAF,MMP9,NFAT5,NOTCH1,NR4A1,PIK3IP1,PKD2,PPAN,PREP,PTPN13,PTPN14,PTPN5,RAP1GAP,RAPGEF4,RORA,RPRM,RPS6KA2,SEMA7A,SOX13,SOX4,TNFRSF4,TOX2,TP53,VANGL2,VCAM1	1108 (18)
NUPR1		transcription regulator		-0.787	2.53e-05	ADGRG1,ADRB2,AEN,AKAP12,ALDH5A1,ALDOC,ALG8,ATP6V0A1,ATP8B1,AURKA,AVPI1,BNIP3,BUB1,CASTOR2,CCDC9,CCN1,CCNA2,CCNF,CD63,CDCA3,CDK4,CDKN1B,CEBPB,CHUK,CITED2,CKAP2L,CREB5,CTPS2,CXCL3,CYB5B,DAGLA,DENND5B,DEPTOR,DIPK2A,DNMT3B,DUSP8,EGLN1,EREG,ERMP1,ETS1,ETV6,FAM162A,FCHSD2,FOXD1,FOXO3,FUCA1,GADD45A,GCH1,GDF15,GRAMD2B,GTSE1,HCN1,HK2,HSPA2,IFIT2,IGF1R,IL13RA1,IRS2,JADE2,KANK2,KIF20A,KIF23,KIFC1,KLF4,KLF6,…	1163 (13)
KLF15	2.425	transcription regulator		-0.8	0.00177	ACADM,Acot1,ACOX1,CCN2,CPT2,CXCL3,DGAT2,EHHADH,GPAM,HADHB,IL23A,PDK4,PPARG,PXMP2,SLC25A20,SLC27A1,SLC2A4,SYNPO	1181 (16)
NFATC2		transcription regulator		-0.802	5e-09	ABCA1,ACP3,AXL,BCL2L1,BCL2L11,Ccl2,CCL5,CCNA2,CCNB1,CCNF,CCR9,CD40,CDH2,CDK4,CISH,CITED2,CRYAB,CSF2,CXCL10,CXCL2,CXCL3,DGKA,E2F5,EDN1,EGR3,ENPP2,FCER2,FGL2,FOXM1,HELZ2,IER3,IFIT1B,IFIT2,IFIT3,IL15,IL18,INHBA,IRF1,IRF7,IRGM,ISG15,ITPR1,JUN,LDHA,LMO4,MAF,MAPK3,MDM2,MERTK,NMI,NOX4,NR4A1,OASL,PDZD2,PLAT,PLD1,PLK2,PPARG,PTPRS,RGS2,RORC,SLFN12L,STAT2,TGFB1,TLE4,TLR2,TNF,TNFSF13B,USP25,ZEB1	1031 (14)
PIAS2		transcription regulator		-0.849	0.0404	AR,Cdkn1c,FOS,IRF1,LDLR
RBL1	-0.544	transcription regulator		-0.899	1.36e-05	BCL2L11,CCNA2,CCND1,CDKN1B,Cdkn1c,CDKN2A,F3,FOS,FOXN1,MCM2,MCM3,MCM5,MCM7,NEK2,NOTCH1,ORC1,PA2G4,PCNA,PLK1,POMC,RB1,RBL1,RRM1,RRM2,THBS1,TNF,TP53,TYMS,ZEB1	1281 (22)
GATA3		transcription regulator		-0.915	0.000601	Aldh1a7,ANGPTL4,BCL11A,BCL2,BCL2L1,BIK,CCL5,CCND1,CCR1,CCR3,CDH2,CDX2,CYP11A1,Defb1,DRAM2,ECHS1,ELOVL1,ELOVL6,ERCC5,ETS1,EVPL,FGF3,FN1,FOS,FSCN1,GLUL,Gm4340 (includes others),GREB1,HPS5,ICAM1,IL18RAP,Ivl,KIT,KLF4,KRT27,Lce1h,LTB,MAF,MDM2,NCOA3,NOTCH1,NR5A2,OVOL1,PCNA,PPARG,Prl2c2 (includes others),PTGS1,RET,SGPP1,SLC2A1,SPRR1A,Sprr2a1/Sprr2a2,Sprr2b,Sprr2h,Tcf7,TGFB1,TGM1,TNF,Usp17la (includes ot…	1224 (19)
FOXP3		transcription regulator		-0.917	0.00109	AKT3,ANLN,ANXA1,BBC3,BCL2,BCL2L11,CAPG,CCL5,CCR1,CSF1,EGR1,ERBB2,FEN1,FGL2,FOS,GAPDH,HLA-A,IGF1R,IGFBP4,IKZF2,IL18RAP,JMY,JUN,LDHA,LGALS1,LGALS3,MAF,MMP9,NR4A1,NRN1,NRP1,NT5E,PCYT1A,PDCD4,PLAGL1,Pmaip1,POLD1,POLE,PPARG,RORC,SLC16A3,TGFB1,TNF,TNFRSF18,TNFRSF4,TXN,VEGFA,VIPR1	990 (15)
HIF1A		transcription regulator		-0.924	9.93e-17	ABCB1,ACE,ADAMTS1,ADORA2B,AGTR1,AHR,AKAP12,ALDOA,ALDOC,ANGPTL4,ANKRD37,AQP9,ATG9A,AURKA,AXIN2,AXL,BACH2,BAX,BCL2,BCL2L1,BID,BMP2,BNIP3,BNIP3L,CA9,CAVIN2,Ccl2,CCL5,CCN1,CCN2,CCND1,CD44,CDCP1,CDH2,CDKN1B,Cdkn1c,CDKN2A,CEMIP,CITED2,CSF1,CSF2,CTPS1,CXCL2,CXCL3,Cxcl3,CYP2S1,CYP4F3,EDN1,EGLN1,ENO1,ERBB2,EREG,ETS1,FAM162A,FHL1,FHL3,FLT1,FN1,FOS,FSCN1,FZD2,GADD45B,GAPDH,GJA1,GPER1,GPI,HES6,HK2,HMGCL,HSPB…	1192 (15)
ZNF395		transcription regulator		-0.927	0.00961	IFI16,IFI44,IFIT1,IFIT2
SMAD7		transcription regulator		-0.935	7.43e-08	ACVR1B,ACVR2A,ADH1C,BCL2L11,BMP2,BZW2,Ccl2,CCL5,CCN2,CCNA2,CCNB1,CDH2,CDK4,CDKN1B,CITED2,COL1A1,CXCL10,DEPTOR,DNMT3B,EFEMP1,EIF4EBP1,FN1,FOXA2,FST,FSTL3,GADD45A,ICAM1,ID3,ITGA6,ITGA7,KRT8,LTBP2,LTBP3,MATN2,MMP9,NET1,PCNA,PLAT,PROM1,RAC1,RELA,SEMA3F,SERPINE1,SLC5A5,SOX9,TGFB1,TGFB2,TGFB3,TGFBI,TIMP3,TNF,TXN,VEGFA,XIAP	1226 (17)
ZNF217		transcription regulator		-0.943	3.05e-05	ATL1,CITED1,COL8A1,CREB5,EPHX4,ERBB3,EVX1,FRK,GAD1,GPRC5A,HAPLN1,IFI16,IGFBP3,ITM2A,LYPD1,MYO1B,NLGN1,NMNAT2,PAK3,PIPOX,PKP2,PLAT,SH3RF2,SHC4,ST6GAL1,STRA6,WNT5B,ZNF616
ID2		transcription regulator		-0.954	2.67e-08	ASCL2,AXIN2,BCL2,BCL2L1,BCL2L11,BCL6,BTG2,CCL5,CCNB1,CCND1,CCND2,CCNG2,CCR1,CCR10,CCR9,CD44,CDK4,Cdkn1c,CDKN2A,CEBPB,CSF1,DGKA,DLL1,E2F2,FOXO3,GADD45B,HOMER2,ICAM1,ID3,IFI16,IGFBP4,IKZF2,ITGB5,JAK2,KLF6,KLF7,LGALS1,LMO4,LTB,MAF,MECOM,Nefm,NFAT5,NFKBIE,NOTCH1,NR4A1,PDGFA,PIK3IP1,PKD2,PLK1,PROM1,PTPN13,PTPN14,PTPN5,RAP1GAP,RAPGEF4,RORA,RPRM,RPS6KA2,SEMA3F,SMOC2,SOX13,SOX4,SOX9,Tcf7,TF,TNFRSF19,TNFR…	1369 (25)
TERF2	0.319	transcription regulator		-1	0.0336	CDKN2A,GLB1,MIF,TP53
SMARCA4		transcription regulator		-1	2.39e-11	ABCA1,ABCB1,ABHD2,ACE,ACE2,ACTA1,ADGRG1,AHNAK,AHR,ANGPTL2,ANXA10,AP3M2,ARL4C,ATG9A,AXIN2,BAK1,BCL2,BGLAP,BMP4,BNIP3L,C19orf12,CA14,CASP1,CCN2,CCNA2,CCND1,CCR1,CCRL2,CD44,CD63,CDKN1B,CDKN2A,CEACAM1,CEBPB,CHEK2,CLCF1,CLDND1,COL1A1,COMMD3-BMI1,CORO6,COTL1,CP,CPM,CRYBG1,CSF1,CTSH,CTSS,DHRS9,DLL1,DYNC1H1,EFNB1,EGR1,ELOVL6,ENO3,ENTPD3,EREG,ESPNL,F3,FADS3,FAM167A,FBLIM1,FCHSD2,FGFBP1,FGFR2,FKBP5,FLNB,FM…	1268 (22)
MEOX2		transcription regulator		-1.014	0.0038	CXCL2,CXCL3,CXCL6,EDN1,EFNA1,F3,ICAM1,ID3,ID4,ITGB5,LRP1,MMP14,PCNA,VCAM1	1088 (16)
CREM		transcription regulator		-1.029	0.000638	ABCA1,ACE,ADORA3,ADRB2,APOLD1,BCL2,BTG2,CAMK4,CCNB1,CCND1,CCND2,CEBPB,COL8A1,CSF2,CYP51A1,EGR1,FOS,FRMD6,GADD45B,HMGCR,HMGCS1,INA,INHA,IRS2,KLF5,LDLR,LSS,MSMO1,NAB2,NOTCH1,NR4A1,NR4A2,PDE3A,PDXK,PGK1,RYR2,Sik1,SLC16A1,SLC2A4,THBS1,TIPARP,TNF,VEGFA	1325 (20)
SP3	-0.324	transcription regulator		-1.034	7.89e-07	ABCA1,ABCB1,ADCY4,AFAP1L1,AKAP12,BGLAP,Ccl2,CCND1,CD40,CDH2,CDKN1B,CEACAM1,CES1,Ces2c,CITED2,COL1A1,CYP51A1,DMD,EGR1,EREG,F2R,F3,FLT1,FOS,GDF15,GLTP,HAS2,HSD11B2,IGF1R,IGFBP3,ITGB5,ITGB8,JUN,KLF4,LDLR,MUC5AC,NPTXR,NR5A2,PADI4,PCYT1A,PGK1,PLAU,PREX1,PRKCD,PROCR,PTGS1,PYY,RBL1,RECK,RELA,Rhox5,SERPINE1,SLC19A1,SLC39A8,SLC9A3,TCEAL1,TGM1,TIMP2,TLR2,TNC,TNFRSF4,TP53,TXNRD1,VEGFA,VIM,XYLT1	1427 (24)
EGR2		transcription regulator		-1.067	5.27e-06	ASS1,BAK1,BCL2,BCL2L11,BCL6,BGLAP,BNIP3L,CAMK4,CAST,CLCN2,CNTFR,CYP51A1,DGKA,DHCR7,DLG3,DMBT1,EGR1,ELOA,ERBB2,FCER2,FOS,GJB1,GOLGB1,HMGCR,ID3,ID4,JUN,LTBP3,MAP2,NAB2,NCL,NCMAP,Nefm,NOTCH1,PLCL1,PMP22,POLR2C,PRKCD,PTHLH,RALGAPA1,ROBO1,RORA,RORC,RRAD,S100A1,SLC12A2,SLC16A1,SQLE,TGFB3,Tgoln1,VEGFA	1010 (16)
MDM4	0.409	transcription regulator		-1.13	0.00631	BAX,BBC3,KRT8,LGALS3,MDM2,SSBP1,TP53,VIM	1282 (20)
MED16		transcription regulator		-1.14	0.0144	ANGPTL4,CCN1,CCN2,MMP9,SLC5A5,VIM
FEV		transcription regulator		-1.152	0.00987	ALDH3A2,ANXA2,CHGB,CITED1,DDC,EFNA5,FOS,GRIA3,HTRA1,ICAM1,LPAR1,NMNAT2,NR2F2,NR3C1,NTN1,SCN3B,SEMA3E,SLC17A8,SOX9,STXBP6,TACR3,TCF7L2,VCAM1,VIM
LHX1		transcription regulator		-1.168	0.000531	ASS1,ATP1B1,CADPS2,CLDN2,CUBN,Defb1,EHD2,FOXA2,FUT9,FZD5,GAD1,GATM,GCNT1,GGT1,GSTA5,HAO2,HHEX,HNF4A,LRRC19,Ly6a (includes others),MEP1A,MEP1B,PRXL2A,RBM47,SEMA6D,SLC45A4,SPP2,Sult1d1,TMEM52B,TMIGD1,UGT2B28,ZDHHC21
JARID2		transcription regulator		-1.184	0.0425	CCND1,CCND2,HOXD8,NOTCH1,RB1,ZEB1
SMARCB1		transcription regulator		-1.206	2.44e-05	ABCB1,AMPH,ATP1B1,AURKA,BCL2L11,BGLAP,BNIP3,BNIP3L,CA8,CCNA2,CCND1,CD44,CDKN2A,CEACAM1,CENPA,CIDEB,COL18A1,COL1A1,CSF1,Cyp2d26,Cyp2d9 (includes others),CYP3A7,DACH1,Defb1,DOCK4,DSC2,DSG2,ERBB2,FOS,GJA1,GJB1,GJB2,IFI16,KIF23,KRT19,LBP,MCM2,MCM3,MCM4,MCM5,MDM2,Mup1 (includes others),NUP210,OAS1,OAS3,PCK1,PDGFB,PLCL1,PLXNB2,POLA1,PPARG,S100A1,TP53	1249 (18)
MSC		transcription regulator		-1.213	0.0192	CCL28,CHL1,CHST4,DDX60,FCRL5,GPAT3,IFI44,IFIT1,IRF7,LGALS12,MAP7D2,PCED1B,PSD3,SCEL,SLC51B,SPP1,SYNE2,ZNF423
EHMT1		transcription regulator		-1.219	0.000599	ADGRL1,ATP1A1,BCL9L,C3,CD38,CORO2A,CP,CYP4F12,EDN3,EFNA1,ETNK2,GFOD1,GRAMD4,HES2,HSD11B2,IL17RC,LCN2,MGST1,MSRB1,PKP2,PLA2G10,POR,PSD4,RARRES1,RRAD,RXRA,SCMH1,SELENBP1,SH3TC1,SHMT1,SMPDL3B,ST3GAL1,STRA6
ZBTB16		transcription regulator		-1.281	1.61e-06	ACER2,AGPAT4,Alox12e,ALPP,B3GNT2,BACH2,BCL6,BGLAP,BID,BMP2,Ccl2,Ccl7,CCNA2,CCND1,CD14,CD180,CD200R1L,Cd24a,CD38,CD40,CD44,CD55,CD81,COL1A1,CPT1C,CSF2,CXCL10,CYP3A7,DDC,EARS2,EYA2,F2R,FABP2,GALE,GATM,H6PD,HPGD,HSD17B2,ID3,IL18R1,IL18RAP,IL3RA,IL6ST,KIT,LMO4,Ly6a (includes others),MAF,ME3,MMP9,MPI,PBX1,PDXK,POLD1,RORA,RORC,RUNX2,SLC2A1,SOX13,SPP1,TCF7L2,TLR6,TMEM176B,TNF,TNFRSF4,UCK2,UGP2	1497 (23)
KDM5B		transcription regulator		-1.337	5.65e-05	AURKA,CCN2,CCNB1,CCND1,CDC14A,CDCA3,CDKN1B,CLCF1,COMMD3-BMI1,DPY19L1,ECT2,EGR1,ERBB2,ERBB3,FBXO5,FGFR2,FHL1,FST,GADD45A,GJB2,GREB1,HMMR,INSIG1,ISG15,ITGB1BP1,JADE2,MCAM,MCM2,MCM3,NCAPH,NDE1,PBK,PIR,PLS3,PSD3,RNF40,SMARCA2,SOX9,TGFB1,TGFB2,TOP2A,WNT7B	1124 (18)
BCL3		transcription regulator		-1.381	0.0331	ACADM,AP1S1,BCL2,CCL5,CCND1,CD40,CXCL10,CXCL2,CXCL3,EGR1,FOS,ICAM1,IRF1,JUN,NR4A1,PDK4,TNF
HNF1B		transcription regulator		-1.394	2.84e-06	ACTN1,AKR1C4,AXIN2,B3GALT5,CCDC80,CD44,CITED2,CLDN7,CPN1,EPS8,FBLIM1,FN1,FOXA2,FOXA3,FZD2,HNF1A,HNF4A,ID3,ID4,IGFBP3,IHH,ITGB6,LAMB1,LEF1,MMP7,NR1H4,NR5A2,PDX1,PKD1,PKD2,PLAU,PLEK2,PMP22,PSTPIP2,RNASE4,S100A6,SGK2,SLC26A3,SLC5A1,Sult1d1,TACSTD2,TM4SF4	1413 (20)
TFAM		transcription regulator		-1.414	0.0132	ACADM,ACOX1,CPT2,ECH1,ECHS1,PFKP,PGK1,SLC25A20
FOXO4		transcription regulator		-1.471	1.14e-07	BCL2L1,BCL2L11,BCL6,BNIP3,CCN2,CCND1,CCND2,CCNG2,CDKN1B,COL4A1,COL4A2,CYP51A1,ELOVL6,FDFT1,FLNB,FLT4,GABARAPL1,GADD45A,GADD45B,HMGCR,HMGCS1,IER3,IGFBP7,IL10RB,IL1R1,MMP9,NAMPT,NRP2,OVOL1,PRKAA2,PRKCD,PTGS1,RUNX2,Scd2,SERPINB1,SERPINE1,SLC2A1,SOX9,TGFB1,TXNIP,VCAM1,VEGFA	1434 (24)
RB1	-0.286	transcription regulator		-1.518	0.00015	ACTB,ATP1A1,ATP1B1,BAK1,BAX,BCL2,BCL2L11,BGLAP,BNIP3,C9orf116,CACNA1S,CAP1,CASP7,CASP9,CCN2,CCNA2,CCNB1,CCND1,CD44,CDCA4,CDCA7L,CDKN1B,Cdkn1c,CDKN2A,CDX1,CDX2,CHRNB1,CITED2,CLIC4,COA3,COL4A1,COL4A2,CPA4,CSF2,CXCL2,CXCL3,DMPK,E2F2,E2F5,EGR1,ENTPD8,EPS8,F3,FABP2,FBXO5,FEN1,FLT1,FN1,FOS,FOXN1,FST,FZD6,GPR142,GPR160,GPR63,GPRC5A,GPRC5C,H1-0,HACD3,HMGB2,HUNK,IGF1R,KANK2,KIT,KRT4,LAMC1,LGR5,LOXL2,MAF,M…	1044 (17)
MLX	-0.523	transcription regulator		-1.526	0.0408	Ccl2,Ccl7,DIO1,ELOVL6,IL1RN,MID1IP1,PKLR,TXNIP
IRF2	-0.383	transcription regulator		-1.532	2.19e-06	ARG1,BCL2,BNIP3L,C1QTNF1,CA12,CASP1,CCND1,CD14,CDKN1B,CEACAM1,CES1,CIDEC,CLDN2,CMTM4,CTSS,CXCL10,CYP4F11,DPY19L1,HK2,IFI35,Ifi47,IL6ST,IL7,IRF1,IRF7,ISG15,KLF4,LBP,LCN2,MMP7,NAMPT,OAS1,PSMB10,PSMB8,PSMB9,RARRES1,SLC51B,SLC7A1,SRXN1,TAP2,TM4SF20,TNFSF13B,TXNRD1,UBE2L6,VCAM1	628 (16)
KLF2		transcription regulator		-1.546	1.67e-07	ACE,ACKR3,ASS1,BMP4,Ccl2,CCL28,CCL5,Ccl7,CCN2,CCR3,CD40,CD44,CD55,CDH2,COL4A1,CXCL2,CXCL3,CYP1B1,DLL1,EDN1,EFNA1,F3,FLT1,GADD45A,GZMM,ID3,ITGB5,KCNN4,LBP,LTC4S,MMP14,MVP,NDRG1,NOTCH1,NOTCH3,NQO1,PLOD2,PLPP3,PPARG,PROS1,PTHLH,RELA,RNASE2,RUNX2,SEMA3F,Serpinb6b,SERPINB9,Serpinb9b,SERPINE1,SFTPD,SLC2A1,SLCO2A1,SOX9,TFPI,TGFB1,TGFB2,THBS1,TNF,TNFRSF4,UGDH,VCAM1	1088 (18)
IRF5		transcription regulator		-1.556	1.29e-06	BAK1,BAX,BCL2L1,BID,CCL5,COL1A1,COL4A1,CXCL10,CXCL2,DHX58,EP300,IFI44,IFIH1,IFIT1,IFIT2,IFIT3,IL23A,IRF7,ISG15,NAMPT,NT5C3A,OAS1,OAS2,OASL,Oasl2,PARP12,PLSCR1,RAC1,RELA,STAT2,TGFB1,TNF,UBE2L6,VEGFA	853 (19)
MAFF		transcription regulator		-1.567	0.0048	ABCC3,GCLC,GSTP1,IL1RN,MOGS,NQO1,TXNRD1
TFAP2A		transcription regulator		-1.595	0.0117	ABCA1,ADRA1D,ANXA1,BAX,BCL2,BCL2L1,CCL28,CSF2,CXCL2,CYP11A1,DCBLD2,EFEMP1,ERBB2,EREG,F2R,KLF4,LIPA,Ly6a (includes others),MCM5,MMP14,MMP9,PLAAT3,PLAU,POR,PPARG,RPL6,SERPINE1,SLC19A1,TNF,VEGFA,XRN1
HOXC8		transcription regulator		-1.609	7.95e-05	ANKRD1,APP,ASS1,Ccl2,Ccl7,CXCL10,FZD2,HES2,KRT19,Ly6a (includes others),NQO1,PLAGL1,PMP22,SLC16A3,SPP1,SRD5A2
PHB	0.282	transcription regulator		-1.614	0.00256	BAX,BCL2,BCL2L1,CCND1,CDK4,CYP11A1,MDM2,PDGFA,RBL1,RELA,TGFB1,TNF	1053 (18)
RUNX3		transcription regulator		-1.623	0.000428	ABCC2,BAX,BBC3,BCL2L11,BGLAP,CCN1,CCN2,CCND1,CDX2,CHST14,CHST3,COL4A1,COMMD3-BMI1,FLNA,FZD2,IL18,IL6ST,ILK,ITGB5,KCTD15,LIFR,MID1,MMP9,MSRB3,NEGR1,NUAK1,RHOBTB3,SCARA3,SGPP1,SPP1,SSX2IP,STC2,TGFB1,TGFB2,TIMP2,TNF,VIM,ZNF496	1427 (26)
HIC1	1.313	transcription regulator		-1.679	0.000101	ACKR3,ADORA2B,ADRB2,ANO2,CA12,CCND1,CDO1,FADS1,FST,GPR161,ID4,INHBA,ITPR1,LCN2,LIF,MCAM,PLEC,RIN2,SFXN3,SNAPC1,SOX9,SPP1,WDR6	632 (12)
HOXB13		transcription regulator		-1.706	0.048	ACP3,AR,BCHE,CCND1,CDKN2A,LRRN1,NIPAL1,SLC30A10,SLC30A4
ARNT		transcription regulator		-1.71	3.85e-07	AHR,ALDH3A1,ALDOA,ALDOC,ANGPTL4,BCL2,BNIP3,CA9,CCND2,CD81,CDCP1,CDK4,CITED2,CYP1B1,CYP2S1,DEGS2,EDN1,ENO1,FLT1,GAPDH,GPI,HES6,HK2,HNF1A,HNF4A,IRS2,KIF20A,LDHA,LOXL2,MPP1,MYL6,NQO1,PCK2,PGK1,PGM2,RGS5,SERPINE1,SLC2A1,TP53,TPI1,TUBA4A,UBE2C,VEGFA,VIM	1384 (20)
BCL11B		transcription regulator		-1.718	0.0139	AHR,BAG2,BCL2,CMA1,HMGCS2,IPMK,LEF1,LTB,MAP3K8,MDM2,NECTIN3,NRP1,PPP1R1B,RORA,RORC,SOX4,SPRY1,TNF,Vmn1r49 (includes others),Vmn1r51 (includes others)			BCL6
Rhox5	-1.892	transcription regulator		-1.744	0.0294	BACH2,BPGM,Cd24a,FZD2,HPRT1,NPM3,PPARG,SLC22A4,TMEM176A,TMEM176B			CLOCK
IRF9		transcription regulator		-1.815	0.00913	CXCL10,Ifi47,IFIT1,IFIT2,IFIT3,IL18,IRF1,IRF7,ISG15,OAS2,Oasl2,RTP4,STAT2,Tgtp1/Tgtp2,TNF,ZBP1	907 (18)		NCOA2
DTX1		transcription regulator		-1.89	0.167	APPL1,EGR1,HIGD1A,LY6E,SPP1,TGFB2,VEGFA			CDX2
SPI1		transcription regulator		-1.894	0.000441	Acp5,ACTB,ARID3A,BAX,BCL11A,BCL6,BCL7A,CCNA2,CCNB1,CCND1,CCND2,CD14,CD180,CD1D,CDK4,Cdkn1c,CHIT1,CSF1,CTSS,CXCL10,E2F2,EPB41L2,FCGRT,FES,FOS,FTH1,HDAC7,HELZ2,HIC1,ID3,IFI44,IFIT1,IFIT1B,IFIT2,IFIT3,IL18,IL1RN,IL33,IRAK3,IRF7,ISG15,ITGA5,JUN,KIT,KLF4,LEF1,LTB,LTF,LY6E,LYZ,Mcpt2,MRC1,MS4A1,MUC5AC,NOL6,Nolc1,OASL,PARP12,PCNA,PIK3CG,PRDX4,PRDX5,PSMB10,PSMB8,PSMB9,RACK1,RAD51,RELA,SNU13,SP6,SPP1,TLR2,…	979 (13)		HNF1A
KLF4	-1.113	transcription regulator		-1.948	3.37e-07	ACVR2A,ADAMTS1,ADRB2,AKR1E2,ALDH1A1,ALKBH1,ARG1,BAX,BCL2L1,BMPER,CCL28,CCNB1,CCND1,CCND2,CD14,CD44,CDKN1B,CDX2,CITED1,CLDN7,CLIC4,COL1A1,COL8A1,CXCL3,DLL1,DSP,DYRK2,EFEMP1,EPCAM,EVPL,EVX1,FABP2,FLT1,FN1,FOXM1,GADD45A,GJB2,GPA33,GPER1,GREB1,HPS5,HSPB1,ID3,IL15,IL23A,IL7,INHBA,IRS1,KIF16B,KLF4,KLF5,KLHL24,KRT19,KRT27,LGR5,MRC1,NOTCH1,NOTCH4,NRP1,Oasl2,OVOL1,PFKP,PLAT,PREP,PROM1,RUNX2,S100A14,SEMA3F…	1197 (19)
STAT1		transcription regulator		-1.96	2.6e-08	ABCA1,ABCB9,ARG1,AXL,BATF2,BAX,BCL2L1,BCL2L11,BCL6,C3,CAND2,CASP1,Ccl2,CCL5,CCND1,CCND2,CCRL2,CD14,CD40,CDKN1B,CEACAM1,CLIC5,CSF2,CTSS,CXCL10,CXCL2,CXCL3,Cyp2d9 (includes others),DDX60,DUOX2,EDN1,EGR1,FGL2,FOS,GREB1,HAPLN3,HERC6,HLA-E,HTRA1,ICAM1,IFI16,IFI35,IFI44,Ifi47,IFIH1,IFIT1,IFIT1B,IFIT2,IFIT3,IFITM2,IGF1R,IL15,IL18,IL1R1,IL23A,IL33,IRF1,IRF2,IRF7,ISG15,JAK2,JUN,KLF4,LCN2,Ly6a (includes ot…	1227 (17)
FEM1A		transcription regulator		-1.961	0.0336	Ccl2,CXCL10,CXCL2,TNF			IRF3
KLF11	0.338	transcription regulator		-1.961	0.00232	ADAMTS1,ADAMTS13,BCL2,CCN2,CEBPB,CHRM3,CHRNB1,CHRNB2,CPT2,EDN1,HADHB,ILK,ITGB5,ITGB6,ITGB8,MMP14,MMP9,PCK1,PCK2,PDGFA,PDGFB,PDK4,PDX1,PLAT,PLAU,PPARG,SERPINE1,SLC25A20,TGFB1,TGFB2,TGFB3,THBS1,TIMP2,TIMP3,TNF,VEGFA	1202 (19)		SREBF1
HES3		transcription regulator		-1.964	1	LCLAT1,MFGE8,MPZL1,PDX1			SREBF2
BRCA2		transcription regulator		-1.964	0.00371	BAX,BBC3,SERPINE1,TP53	416 (7)		IRF1
MAFG		transcription regulator		-1.969	0.122	ABCC3,GCLC,GSTA3,GSTP1,NQO1,TP53,TXNRD1			HNF4A
PTTG1		transcription regulator		-1.974	0.0048	APEX1,BCL2,CCNA2,CCNB1,CCND1,CD44,CDH2,FEN1,MDM2,MGMT,MIF,NPRL3,PMS2,POLD1,POLE,POLK,REV1,SLC5A5,SRD5A2,TP53,VEGFA,VIM,WRN	1275 (20)		FOXA2
SF1		transcription regulator		-1.997	0.00961	COL1A1,FN1,ICAM1,MYL6			IRF7
CAVIN1		transcription regulator	Inhibited	-2	0.0758	BAX,CAPS2,CDKN2A,TNF
FOXO3	-0.364	transcription regulator	Inhibited	-2.014	7.56e-16	Acot1,AHR,ALDH3A1,ANXA1,APEX1,AR,ATG9A,AURKA,BAX,BBC3,BCL2,BCL2L11,BCL6,BMP2,BNIP2,BNIP3,BNIP3L,BPGM,CAD,CCN1,CCN2,CCNB1,CCND1,CCND2,CCNG2,CDC20,CDK4,CDKN1B,COL4A1,COL4A2,CPT1A,CXCL10,EGR1,EIF4EBP1,FBXO5,FGFR2,FLNB,FLT4,FN1,FOS,FOSB,FOXM1,FOXO3,GABARAPL1,GADD45A,GADD45B,GCLC,GLUL,GRB14,GSTM5,GTF2I,HMGCR,HMGCS2,HTATIP2,IARS1,ICAM1,IER3,IFIH1,IGF1R,IGFBP7,IKZF2,IL10RB,IL1R1,IMPDH2,INHBA,IRS2,LCN2,M…	1313 (22)
BCL6	0.31	transcription regulator	Inhibited	-2.047	2.9e-08	ABCD3,ACAA2,ACOX1,ANXA6,BACH2,BAX,BCL2,BCL2L1,BCL6,BMP2,Ccl2,Ccl7,CCND1,CCND2,CD44,CDKN1B,CDKN2A,CISH,CLCN2,COL1A1,CPD,CSF1,CXCL10,CXCL3,EGR3,EHHADH,EPB41L2,FCER2,FCGRT,FCRL1,FTH1,GABARAPL1,GADD45A,GOLM1,GSTM5,HADHB,HAPLN1,HERC6,IL13RA1,IL18,IL23A,IRF1,JMY,KLF6,KLHL23/PHOSPHO2-KLHL23,LBH,LDHB,LDLR,Ly6a (includes others),MAF,MRC1,MSH2,ORC1,PDCD4,PIK3CG,Pmaip1,PRSS23,RGS4,RHOF,RNASEL,RORC,SERPINE1,…	977 (16)
FOXA1		transcription regulator	Inhibited	-2.086	0.00174	ADH1C,ANXA1,BMP2,CDKN2A,CDX2,COL18A1,CXCL10,DDC,DSE,ELK3,EPHX1,ERBB3,FABP2,FMN1,FOXA2,FOXA3,Gcg,GFRA4,GREB1,HADH,HNF1A,HNF4A,LHFPL6,MSH2,MUC5AC,MYL9,NPTX2,NR4A2,PCK1,PDGFRB,PYY,RORA,RORC,RPRM,SLC12A2,SOX9,TACR3,TAT,TF,TMPRSS2,TNF,Tpm2,UST,WNT7B	1455 (23)
PPARGC1B	-0.611	transcription regulator	Inhibited	-2.088	0.00357	ABCA1,ACACB,ACADM,C3,CCND1,COX7A1,CYCS,ENO1,ERBB2,FDFT1,GPAM,HK2,HMGCR,LSS,MCM4,PCK1,PDK4,PPARGC1B,RUNX2,SLC2A4,SQLE,VEGFA	1523 (24)
CLOCK		transcription regulator	Inhibited	-2.09	1.5e-08	ABCB10,ACOX1,ADPGK,AK4,AKT3,Alox12e,ANGPTL4,ANKRD12,APP,ARHGEF10,ARNT2,C1QBP,CA1,CBR1,CCN2,CCND1,CEMIP,CHST3,CLIP1,CPD,CTPS2,CYP51A1,DTX4,DUSP8,EIF4G2,ELOVL6,F2R,FAM107A,FKBP5,FOXA3,FZD6,GADD45A,GADD45B,GCC2,GJA1,GLIPR1,GYS2,HAS2,HES6,HMGCS2,HSPH1,ICAM1,IHH,ITM2C,KANK2,KCNN3,KIAA0100,KIF20A,KRR1,MID1IP1,MMP7,MSMO1,NADK2,NCOA4,OAS3,PA2G4,PDGFRB,PER2,PIGA,PIP4K2C,POR,POU6F1,PRELID3B,PTPN14,RBP2,RCN…	772 (8)
NCOA2		transcription regulator	Inhibited	-2.096	1.19e-05	ABCB11,ADORA3,AHR,ALDH1B1,AR,BCAS1,BMP2,C3,Ccl2,CCL5,CCND1,CXCL10,CYP51A1,EGR1,ELOVL6,FST,HLA-A,HMGCR,HMGCS1,HNF1A,IFIT1B,IFIT2,IRF1,IRF7,ISG15,KLF4,KRT19,LDLR,LIPG,LYZ,MC2R,NR4A2,NSDHL,OAS3,OASL,PCK1,PPARG,PPP1R3B,RAI1,RET,RORA,SLC3A1,TNF,TPI1,TRIM5,VDR	1730 (25)
ARNTL		transcription regulator	Inhibited	-2.168	0.00844	ACOX1,ADORA2B,AGRP,CCNG2,CDKN2A,CRY1,ELOVL6,GPAM,GPT,HMGCS2,IHH,ITGB8,LDLR,NQO1,PER2,PPARGC1B,RBP2,RYR2,STARD4,TP53	772 (8)
RAD21		transcription regulator	Inhibited	-2.176	0.17	BDNF,CCNG2,IRS2,ITGA5,SOX4,TGFB1,THBS1,VIM,ZEB1
TBX3		transcription regulator	Inhibited	-2.2	0.0985	CDKN2A,GJA1,LBH,SCN5A,TP53
TFAP2C	4.816	transcription regulator	Inhibited	-2.209	0.000113	ADA,ANLN,CCN2,CD44,CDX2,CYP11A1,DYRK2,EGR3,ERBB2,F2R,FMN1,FST,GREB1,GSTA3,KRT8,MAGI3,MAL,Meis1,MMP14,MMP9,NRP1,RET,SEMA3B,SFTPD,SLC19A1,TACC1,THBS1	1417 (22)
ZNF148		transcription regulator	Inhibited	-2.219	0.124	BAK1,BCL2L1,CDKN2A,FN1,VIM
DNAJB6		transcription regulator	Inhibited	-2.219	0.0564	CDH2,CDKN1B,NPM1,SPP1,TNF,VIM
TFE3		transcription regulator	Inhibited	-2.234	0.349	COX7A1,CYCS,HK2,INSIG1,IRS1,IRS2,MS4A1,PPARG,PPARGC1B,SERPINE1
WWC1		transcription regulator	Inhibited	-2.236	0.0404	BMP2,CCN2,CDH2,PDGFB,VIM
BHLHA15		transcription regulator	Inhibited	-2.236	0.0728	ARRDC3,CLU,FNDC3A,GJB1,GJB2,KRT19
CDX1	-0.969	transcription regulator	Inhibited	-2.256	0.0111	ALDH3A1,B3GALT5,BCL2,CCND1,CCND2,CDX1,CLDN2,CLU,DDC,FOXQ1,FXYD3,Gkn3,HEPH,Muc1,MUC5AC,RBL1
CDX2	-0.635	transcription regulator	Inhibited	-2.291	2.15e-05	ABCB1,ABCB10,ALDH3A1,AOC1,AXIN2,B3GALT5,BCL2,CDH17,CDHR5,CDX1,CDX2,CLDN2,CLU,DDC,DHRS9,DLL1,ETS1,FOXQ1,FUT2,FXYD3,Gcg,Gkn3,HEPH,HNF4A,HOXD3,HOXD8,JUN,KLF4,KLF5,LEF1,MEP1A,MTUS1,Muc1,MUC5AC,MYO1A,NR1H4,NR2F2,RAB8A,SCIN,SH3PXD2A,SLC5A1,SOX9,SYNPO,TCF7L2,TGFB1,USP12	545 (7)
WDR77	0.5	transcription regulator	Inhibited	-2.359	0.0139	Ceacam10,Defb1,DMBT1,PSCA,PTK6,SAA1,SGK2,SLC26A3,TGFB1
NLRC5		transcription regulator	Inhibited	-2.387	0.136	CD40,HLA-A,HLA-E,HLA-F,PSMB9,TNF
MXI1		transcription regulator	Inhibited	-2.414	0.0564	APEX1,CCNB1,FOXM1,IARS1,IMPDH2,SLC7A1
HDAC4		transcription regulator	Inhibited	-2.435	0.0284	ACTA1,ANGPTL4,BDNF,CACNA2D1,CAMTA2,CCNB1,CCND1,CDKN2A,DMD,FOS,FST,GADD45A,HDAC2,HMGCR,HOMER2,ISG15,JUN,LDHA,MMP9,NR4A1,NR4A2,PMP22,PRKCA,RGS2,RGS4,RUNX2,SH3GL2,SLC2A1,SLC2A4,SLC8A1,TNF,VCAM1,VEGFA
HOXA4		transcription regulator	Inhibited	-2.439	0.0216	ANKRD1,CCN1,CCN2,CCND1,CCND2,TGFB2
ZFP36		transcription regulator	Inhibited	-2.586	0.00117	CENPA,CLMP,CSF2,CTSS,CXCL2,CXCL3,FOS,ICAM1,IER3,IL23A,IRF1,JUN,LCN2,LTF,MEFV,MXD1,NEK2,NUF2,PBK,PLAU,PRC1,SERINC3,SOX6,SPP1,SPRYD7,TNF,TOP2A,VCAM1	1054 (14)
SPDEF		transcription regulator	Inhibited	-2.598	0.000109	CCN2,CD40,CDH2,CLDN7,COL16A1,COL1A1,COL4A1,COL4A2,COL4A5,FOXJ1,ITGA5,ITGA6,LAMB2,LAMC1,LEF1,MUC5AC,PLAU,PRKCA,SERPINE1,STMN1,TGFB1,TNC,VASP,VIM,ZEB1	1044 (20)
HNF1A	-0.297	transcription regulator	Inhibited	-2.658	2.73e-06	A1CF,ABCC2,ACE2,ADH1C,AK2,Akr1c12/Akr1c13,Akr1c19,AKR1C4,Alox12e,ANKS4B,APOB,APOH,AQP9,ASAH2,B3GALT5,BACH2,BCL2L1,BCL6,BMP3,CCL28,CCND1,CD55,CDHR2,CDKN1B,CDO1,CFI,CLDN2,CLDN8,CLIC5,CMC2,CPN1,CREBL2,CYB5B,CYP2C9,CYP3A7,DDC,DTL,ELF3,ETV5,FAM107B,FCAMR,FMO1,FNTB,FOXA2,FOXA3,FRK,FUT10,FUT9,FXYD3,GATM,GCNT3,GJB1,GLP1R,GLUL,GPATCH2,GPR137B,GPR39,GPX2,HMGCR,HNF1A,HNF4A,HOPX,HSD17B2,IGF1R,IHH,KDM2B,KIF20…	1637 (21)
HDAC5		transcription regulator	Inhibited	-2.698	0.0237	ACADM,ACTA1,AURKA,COX7A1,CPT1A,CPT2,HK2,HMGCL,HMGCR,HMGCS2,JUN,KLF6,NDUFA1,NR4A1,PMP22,PPARG,PTPN13,RUNX2,SLC2A4,SLC8A1,TNF,USP28
GLIS2		transcription regulator	Inhibited	-2.72	5.13e-05	C3,Ccl2,CCL28,CCN2,CCND1,COL1A1,CXCL10,CXCL3,IL15,IL23A,IL33,LTBP2,MMP14,SERPINE1,TGFB1,VIM	932 (17)
PPARGC1A		transcription regulator	Inhibited	-2.933	2.42e-08	ABCB11,ACACB,ACADM,ACOX1,ADAMTS1,ADGRG1,AK1,ALAS1,BAX,BBC3,BCAT2,BDH1,BMP4,BMPER,BNIP3,C3,Ccl7,CCN2,CD40,CDC42EP1,CEBPB,CIDEB,CPN1,CPT1A,CXCL10,CYCS,CYP11A1,CYP2C9,DIO1,EDN1,EGFL6,EGLN1,ERBB2,FAM20A,FBLN2,GDF11,GDF15,GOT2,GPAM,HAPLN1,HK2,HMGCL,HMGCS2,IGFBP3,IGFBP7,IL18,IL1RN,INHA,INHBA,INPP5J,INSIG1,INSIG2,IRS1,IRS2,ITGB1BP1,LAMB1,LDHA,LDHB,LDLR,LGALS9B,LIFR,LIPA,MAL,MCM3,MCM4,MCM5,MFN2,MSMO1,NEF…	1080 (18)
PCGF2		transcription regulator	Inhibited	-2.954	0.102	CCND2,CDH2,CDK4,CDKN2A,FN1,NOTCH1,NOTCH3,TP53,VIM,ZEB1
SIRT2		transcription regulator	Inhibited	-3.051	0.00012	CDKN1B,CDKN2A,CXCL10,DHCR7,FDFT1,HMGCR,IFIT2,ISG15,LSS,Oasl2,PMVK,SC5D,SQLE	1200 (23)
NOSTRIN	-0.761	transcription regulator	Inhibited	-3.104	0.00145	ACE,BCL2,Ccl2,CCL5,COL18A1,FLT1,FN1,ITGA5,KIT,MMP9,PLAU,TFPI,THBS1	951 (13)
ESRRA		transcription regulator	Inhibited	-3.221	0.00144	ACADM,ACOX1,ALAS1,ALDOC,ALPP,ASAH1,B4GALT6,CACNB1,CCL28,CDH2,COL1A1,CYCS,CYP51A1,ENO1,ERBB2,GAPDH,HK2,HMGCR,HMGCS1,IGFBP4,KRT19,KRT20,KRT27,KRT31,KRTAP3-1,LDHA,LDHB,LIPA,LTF,MIEN1,NDUFA1,PCK2,PDK4,PPARG,PPARGC1B,PPP1R1B,PPP2R2B,PRKCD,RAPGEFL1,RUNX2,Scd2,SLC25A20,SPP1,TGFB3,TNFRSF11A,TOP2A,TPI1,UBALD1,WIPF2	1453 (21)
IRF3		transcription regulator	Inhibited	-3.236	1.14e-07	ABCC2,ADAR,AHNAK,Bst2,Ccl2,CCL5,CCRL2,CD40,CDH2,CLIC4,CXCL10,Cxcl3,DDX60,DHX58,FN1,FST,FUT2,HELZ2,HLA-F,ICAM1,IFI16,Ifi27l2a/Ifi27l2b,IFI44,Ifi47,IFIH1,IFIT1,IFIT1B,IFIT2,IFIT3,IL15,IL23A,IRF1,IRF7,IRGM,ISG15,LCN2,MMP9,NR3C1,NRAP,NT5C3A,OAS1,OAS2,OAS3,OASL,Oasl2,PARP12,PARP14,PHF11,PLAC8,PLCG2,Pmaip1,SAMD9L,SAP30,STAT2,TDRD7,TFAP2C,TIMP3,TNF,TNFRSF4,TNFSF15,TPST1,Trim30a/Trim30d,UBE2L6,VCAM1,VIM,…	472 (13)
SREBF1		transcription regulator	Inhibited	-3.318	5.14e-08	ABCA1,ACACB,ACSS2,ADGRG1,ADH1C,AK4,ALDOA,ALDOC,AR,BAX,BCL2,BCL2L1,BGLAP,Bhlhe41,CD14,CDK4,CEBPB,CFI,CHMP2A,CSRP1,CXCL10,CYCS,CYP51A1,DBI,DGKQ,DHCR7,EHHADH,ELOVL6,ETHE1,FADS1,FADS2,FAM189B,FDFT1,FN1,GLB1,GLP1R,GPAM,HK2,HMGCR,HMGCS1,HNF4A,INSIG1,IRS2,LDLR,LGALS3,LSS,MSMO1,NSDHL,P4HA2,PCK1,PCK2,PCYT1A,PDK1,PDX1,PKLR,PLA2G3,PLS3,PMP22,PMVK,PNPLA3,PPARG,PPAT,PPCS,S100A13,SC5D,Scd2,SELENOP,SERPINE1,SLC…	1205 (17)
SREBF2		transcription regulator	Inhibited	-3.362	7.69e-07	ABCA1,ACAA2,ACSS2,ALDOC,BMP4,CYP51A1,DBI,DHCR7,ELOVL6,FADS2,FDFT1,GTF2I,HES6,HMGCR,HMGCS1,INSIG1,IRS2,LDLR,LIPA,LRP1,LSS,MSMO1,NPC1L1,NSDHL,PCYT1A,PDX1,PMVK,PPARG,SC5D,SQLE,STARD4,TM7SF2	918 (19)
IRF1	-0.41	transcription regulator	Inhibited	-3.473	1.43e-05	ADAM8,BAK1,BAX,BCL2,CASP1,CASP7,CCL5,CCNB1,CCND1,CD40,CDK4,CEACAM1,CTSS,CXCL10,CXCL2,CXCL3,FGL2,HELZ2,IFI35,IFI44,Ifi47,IFIH1,IFIT1,IFIT2,IFIT3,IL15,IL18,IL33,IL7,IRF1,IRF2,IRF7,ISG15,JAK2,LTB,MAP4K4,MMP9,OAS1,OAS2,OAS3,OASL,PCNA,PLAAT3,PSMB10,PSMB8,PSMB9,STAT2,TAP2,TGFB1,TLR6,TNF,TNFSF13B,TP53,TRADD,Usp17la (includes others),VCAM1	1147 (16)
HNF4A	-0.76	transcription regulator	Inhibited	-3.549	8.38e-15	A1CF,AAMDC,AASS,ABCB10,ABCB11,ABCB9,ABCC2,ABCC3,ABCG1,ABHD6,ACAA2,ACBD6,Acnat1/Acnat2,Acot1,ACOX1,ACOX2,ACP6,ACSS2,ACTN1,ACTR3,ACY3,ADCY7,ADRB2,ADSS2,AGA,AHNAK,AK2,AKAP13,Akr1b7,AKR1C4,ALDH1A1,ALDH1L1,ALDH3A1,ALDH5A1,ANKRA2,AOC1,AP3B1,APH1A,APOB,APOH,APP,AQP8,AQP9,ARFGEF1,ARFIP2,ARG1,ARL1,ARL4C,ARMC8,ARPC5,ASAH1,ATG4D,ATG9A,AVPI1,AXIN2,AZI2,B9D2,BAAT,BCL2L1,BCL6,BDH1,BNC1,BPGM,C11orf54,C1D,C3,C9o…	1434 (24)
FOXA2	1.057	transcription regulator	Inhibited	-3.587	1.94e-06	ABCB1,ADH1C,ALAS1,ALOX5,APOB,C3,CCND1,CD55,CDX2,CHD6,CLDN4,CPM,CPN1,CPT1A,CYP2C9,DDC,EPCAM,EPHX1,FOXA2,FOXA3,FOXJ1,Gcg,GFRA4,GPRC5C,HADH,HES6,HK2,HMGCS2,HNF1A,HNF4A,HPGD,IL33,LTC4S,LYZ,MAP1B,Mt1,MTUS1,MUC5AC,MYL9,NFKBIE,NPTX2,NR1H4,NR1I2,NR4A2,NR5A2,NUMB,PCK1,PDGFRB,PDX1,PPARG,PROS1,PYY,RNASE2,RORA,RORC,SAA1,Saa3,SFTPD,SH3PXD2A,SLC2A4,SMOC1,TACR3,TAT,TF,TGFB1,TMPRSS2,TNF,Tpm2,TUBB4B,UST,WNT7B	1370 (22)
PHF12		transcription regulator	Inhibited	-3.606	0.00202	BRIX1,DDX56,KRR1,NOP2,PA2G4,PES1,PRPF31,RNASEL,RRP9,RRS1,UTP20,WDR12,ZNHIT6
MXD1	-0.701	transcription regulator	Inhibited	-4.26	0.00446	BCL6,BUB1,CCNA2,CCND2,CDK14,CDK4,EDN1,Gar1,IARS1,IDH2,MXD1,MYBBP1A,MYCL,NOP14,NOP2,NOP56,NOP58,NOTCH4,PES1,RPL3,RPS2,RPSA,TNFRSF21,TOP2A	1190 (17)
IRF7	-1.019	transcription regulator	Inhibited	-4.432	1.82e-09	ADAR,BCL2L1,Ccl2,CCL5,CCRL2,CD40,CXCL10,DHX58,HELZ2,IFI16,IFI35,IFI44,Ifi47,IFIH1,IFIT1,IFIT1B,IFIT2,IFIT3,IFITM2,IL15,IL33,IRF1,IRF7,IRGM,ISG15,JAK2,Ly6a (includes others),MAP3K8,MICB,NAMPT,NMI,NRAP,NT5C3A,OAS1,OAS2,OAS3,OASL,Oasl2,PARP12,PARP14,PHF11,PLAC8,PLSCR1,PSMB10,PSMB8,PSMB9,RTP4,SAMD9L,SAP30,STAT2,TAP2,TDRD7,TMBIM6,TNFSF13B,TOR1B,TPST1,Trim30a/Trim30d,TRIM5,UBA7,UBE2L6,USP25,ZBP1	713 (18)
HCFC1		transcription regulator			0.0382	PDX1,PPARGC1B,RRM1
GON4L		transcription regulator			0.0048	CCNA2,CCNB1,CCND1,CCND2,CCNF,E2F2,RBL1
RAD54L2		transcription regulator			0.0293	AR,Rhox5
ZSCAN1		transcription regulator			0.0293	ADAMTS4,PRKCA
ATOH7		transcription regulator			0.0382	FGF19,SOX11,SOX4
KLF17		transcription regulator			0.00768	CCL28,FN1,IL1RN,IL23A,RB1,TP53,VIM	933 (7)
TFCP2L1		transcription regulator			0.0273	CYP11A1,GRHL1,KLF4,SIRPA,SLC27A4
FOXK2		transcription regulator			0.00371	CDC14A,CDKN1B,MCM3,SERPINE1
RRP1B	0.481	transcription regulator			1.76e-11	ADCY7,ALDH5A1,AURKA,CASP7,CCNA2,CCND1,CDC20,CEBPB,DBF4,EP300,FEN1,FZD6,GADD45A,HSP90AA1,HSP90AB1,ITGB5,MCM2,MCM3,MCM4,MCM5,MDM2,MRAS,NCOA1,ORC1,PCNA,PDGFC,PLK1,POLD1,PRKCA,PRKCD,RABIF,RBL1,RPL11,RPL14,RPL37,RPL6,Rplp1 (includes others),RPS10,RPS19,RPS3,RPS8,RPS9,RRP1B,SERPINE2,SPP1,TGFB1,TOP2A,TOPBP1,VDR
ADNP		transcription regulator			0.0293	TNF,TP53
ARID2		transcription regulator			0.0382	BGLAP,BMP4,FGFR2
BATF2	-0.655	transcription regulator			0.0293	CCN1,JUN
VENTX		transcription regulator			0.0293	CCND1,CDKN2A
E2F7		transcription regulator			0.0169	CCNA2,CCNB1,E2F2,ECT2,KIF23,MCM2,RACGAP1
RSF1		transcription regulator			0.0382	BCL2,BCL2L1,XIAP
ZNF277		transcription regulator			0.0293	PRMT3,RPS2
BCOR		transcription regulator			0.00343	ARID3A,ARID5B,BANK1,CD37,CDKN1B,ETV6,ISG15,MS4A1,STAT2
UBP1		transcription regulator			0.00961	CD40,CYP11A1,Cyp2d9 (includes others),GRHL1
DNMT3L		transcription regulator			0.00961	Cdkn1c,EPCAM,IGF2R,Rhox5
SOX18		transcription regulator			0.00961	BCL2,IL6ST,RXRA,VCAM1
SHOX		transcription regulator			0.0101	CCNB1,CDKN1B,RB1,RBL1,TP53
ATN1		transcription regulator			1.07e-06	ATP1A1,ATP1B1,BASP1,BCL6,BDNF,BMP1,BMP3,CA4,CAMK4,Cd24a,CHGB,CHUK,EVL,GAD1,GAS7,IFI16,IL11RA,KAT2A,KCNK3,LSM2,LTBP2,MAX,MCAM,NAB2,NEFH,Nefm,NFIC,NSG2,PABPC4,PITPNM1,PPP1CB,PRKCD,RGS16,Sik1,SMC2,SOX11,SOX4,SPP1,SPTBN2,STMN1,TIAM1,TM4SF1,Tmsb4x (includes others),TUBA4A,TYRO3,U2AF2	452 (7)
PER2	-0.565	transcription regulator			0.0309	ALAS1,ALDH3A1,ATP1A1,CCND1,IHH,PER2
RBM14		transcription regulator			0.0382	CCND1,HTRA1,SOX6
RUVBL2	0.278	transcription regulator			7.41e-05	AXIN2,CCND1,CCND2,MCM3,MCM4,PCNA,RBL1,TP53	1163 (26)
OSTF1	-0.402	transcription regulator			0.0293	BGLAP,RUNX2
BRD8		transcription regulator			0.0382	AGPAT2,AR,PPARG
GTF2H4		transcription regulator			0.00371	CAD,CCND2,CDK4,NCL
NKX3-1		transcription regulator			0.000639	AR,BTG2,CA12,CA8,CASP7,ETS1,ETV3,FES,FKBP5,FOS,FOXO3,IGFBP3,MMP23B,MMP9,RAMP1,SOX4,STEAP1,TMPRSS2,VIL1,Vnn3	1138 (19)
CNOT7		transcription regulator			0.00353	CSTA,HERC6,IFI35,ISG15,OAS1,OAS2,OAS3,PARP12,PLSCR1,PSMB8,TAP2,UBE2L6	332 (7)
BCLAF1		transcription regulator			0.0293	CCND1,TP53
SMYD1	-0.291	transcription regulator			0.0293	BDH1,CYCS,FAHD1,GOT2,HK2,MIF,NAMPT,OGDHL,PGD,PYGL,RXRA,SDHA,TPI1,UBC,UGP2
ING2		transcription regulator			0.0293	SERPINE1,SPP1
ZFP36L1		transcription regulator			0.0293	TNF,VEGFA
TRRAP		transcription regulator			0.000417	CCND2,MCM3,MCM4,MDM2,NCL,PCNA,RBL1,TP53	1133 (16)
SIN3B		transcription regulator			3.97e-05	BCL6,CAD,CCNG2,CDK4,GADD45B,KLF10,KLF6,LDHA,NCL,RRM2,TXNIP,TYMS	1007 (7)
YBX3		transcription regulator			0.000112	CCND1,CLDN2,CSF2,ERBB2,ERBB3,JUN,PCNA
BTG1		transcription regulator			0.00502	BCL2L1,JUN,NR3C1	439 (7)
GPBP1		transcription regulator			0.0293	ADA,TOP2A
SNW1		transcription regulator			0.0052	BGLAP,CCND1,MMP9,PLAU,SERPINE1	944 (13)
MED6		transcription regulator			0.0293	AURKA,IFIT2
ZFPM1		transcription regulator			0.0043	ALOX5,CD63,CEBPB,CNN3,CPD,FYB1,IFITM2,IKZF2,IL10RB,IL1R1,IRAK3,ITPKB,KLF6,MFHAS1,NRARP,PBX1,PLAAT3,PRELID2,SCIN,SLC50A1,THYN1,XK	831 (16)
NFKBIE	0.696	transcription regulator			0.00281	CSF2,CXCL3,ICAM1,LIF,TNF,VCAM1	770 (13)
NFIB		transcription regulator			0.0154	BMP6,CREB5,EFNB1,FOXJ1,HSD17B7,IYD,JCAD,KRT8,LZTS1,NT5E,Pitpnc1,PKLR,PLEKHF1,STEAP4
UBE2V1		transcription regulator			0.0293	BCL2,FOS
BRMS1		transcription regulator			0.0101	GJA1,GJB1,GJB2,PLAU,SPP1
FUS		transcription regulator			0.0028	CCND1,EIF4G2,FLNA,HSPD1,ICAM1,NCL,PLK1,RPS16,RPS19,RPS3
ID4	-1.469	transcription regulator			0.0048	BAX,BBC3,CDKN1B,CDKN2A,PPARG,VEGFA,VIM	416 (7)

## Sheet: Table 3
PeakID	Overlap_with_KO	Overlap_with_ATAC	Chr	Start	End		Strand	Peak Score	Focus Ratio/Region Size	Annotation	Detailed Annotation	Distance to TSS	Nearest PromoterID	Entrez ID	Nearest Unigene	Nearest Refseq	Nearest Ensembl	Gene Name	Gene Alias	Gene Description	Gene Type
ALL_peak_59016	NO	YES	chr19	11074114	11074572	chr19.11074114	+	60.4281	NA	intron (NM_022430, intron 3 of 6)	intron (NM_022430, intron 3 of 6)	6760	NM_022430	64381	Mm.34460	NM_022430	ENSMUSG00000024730	Ms4a8a	2010004L09Rik|AI481240|CD20L5|Ms4a8	membrane-spanning 4-domains, subfamily A, member 8A	protein-coding
ALL_peak_27941	NO	YES	chr12	111007768	111008313	chr12.111007768	+	53.9185	NA	intron (NR_036598, intron 1 of 2)	intron (NR_036598, intron 1 of 2)	13642	NR_036598	77878	Mm.293198	NR_036598		6030440G07Rik	-	RIKEN cDNA 6030440G07 gene	ncRNA
ALL_peak_43493	NO	YES	chr15	77919217	77919695	chr15.77919217	+	45.8552	NA	intron (NM_019913, intron 3 of 3)	(CA)n|Simple_repeat|Simple_repeat	9538	NM_019913	56551	Mm.291917	NM_019913	ENSMUSG00000005354	Txn2	2510006J11Rik|AI788873|Trx2	thioredoxin 2	protein-coding
ALL_peak_57795	NO	YES	chr18	73786928	73787321	chr18.73786928	+	35.8866	NA	intron (NM_145494, intron 11 of 15)	(TG)n|Simple_repeat|Simple_repeat	28268	NM_145494	107029	Mm.36817	NM_145494	ENSMUSG00000024556	Me2	AW120568|D030040L20Rik|NAD-ME	malic enzyme 2, NAD(+)-dependent, mitochondrial	protein-coding
ALL_peak_25078	NO	YES	chr12	55464577	55465130	chr12.55464577	+	35.8614	NA	intron (NR_035430, intron 1 of 3)	intron (NR_035430, intron 1 of 3)	27794	NM_010907	18035	Mm.170515	NM_010907	ENSMUSG00000021025	Nfkbia	AI462015|Nfkbi	nuclear factor of kappa light polypeptide gene enhancer in B cells inhibitor, alpha	protein-coding
ALL_peak_45257	NO	YES	chr16	10350044	10350454	chr16.10350044	+	33.9921	NA	Intergenic	(TG)n|Simple_repeat|Simple_repeat	-18964	NR_126064	381033	Mm.263108	NR_126064		Gm1600	Gm1776	predicted gene 1600	ncRNA
ALL_peak_95949	NO	YES	chr6	50254987	50255549	chr6.50254987	+	33.5607	NA	intron (NM_018769, intron 1 of 9)	PB1D7|SINE|Alu	6501	NM_018769	54722	Mm.248361	NM_018769	ENSMUSG00000029821	Dfna5	2310037D07Rik|4932441K13Rik|Dfna5h|EG14210|Fin15	deafness, autosomal dominant 5 (human)	protein-coding
ALL_peak_74922	NO	YES	chr3	96555151	96555525	chr3.96555151	+	32.82	NA	TTS (NR_040409)	TTS (NR_040409)	-2619	NM_023719	56338	Mm.410189	NM_023719	ENSMUSG00000038393	Txnip	1200008J08Rik|AA682105|Hyplip1|THIF|Tbp-2|VDUP1	thioredoxin interacting protein	protein-coding
ALL_peak_20905	NO	YES	chr11	96278155	96278669	chr11.96278155	+	32.2315	NA	Intergenic	Intergenic	-3493	NM_010461	15416	Mm.4822	NM_010461	ENSMUSG00000056648	Hoxb8	Hox-2.4	homeobox B8	protein-coding
ALL_peak_16015	NO	YES	chr10	125961496	125962195	chr10.125961496	+	31.5669	NA	Intergenic	Intergenic	-4374	NM_177152	320398	Mm.275586	NM_177152	ENSMUSG00000020105	Lrig3	9030421L11Rik|9130004I02Rik|9430095K15Rik|mKIAA3016	leucine-rich repeats and immunoglobulin-like domains 3	protein-coding
ALL_peak_33547	NO	YES	chr13	112311676	112312067	chr13.112311676	+	31.3629	NA	intron (NM_001168404, intron 2 of 7)	RLTR13D2|LTR|ERVK	23353	NM_001168404	77318	Mm.159895	NM_029898	ENSMUSG00000049985	Ankrd55	C030011J08Rik	ankyrin repeat domain 55	protein-coding
ALL_peak_105675	NO	YES	chr7	98103131	98103517	chr7.98103131	+	31.3548	NA	intron (NM_001256081, intron 3 of 48)	(CACG)n|Simple_repeat|Simple_repeat	5924	NM_001256083	17921	Mm.1403	NM_008663	ENSMUSG00000030761	Myo7a	Hdb|Myo7|USH1B|nmf371|polka|sh-1|sh1	myosin VIIA	protein-coding
ALL_peak_49735	NO	YES	chr17	4785545	4785937	chr17.4785545	+	31.2347	NA	Intergenic	Intergenic	150761	NR_130984	75117	Mm.429393	NR_130984		4930517M08Rik	-	RIKEN cDNA 4930517M08 gene	ncRNA
ALL_peak_27788	NO	YES	chr12	108251580	108252053	chr12.108251580	+	29.9507	NA	intron (NM_001159910, intron 1 of 5)	(CGTG)n|Simple_repeat|Simple_repeat	23601	NM_001159910	668158	Mm.482792	NM_001159910	ENSMUSG00000084883	Ccdc85c	EG668158|Gm265|Gm9010	coiled-coil domain containing 85C	protein-coding
ALL_peak_116040	NO	YES	chr9	31290024	31290391	chr9.31290024	+	29.241	NA	Intergenic	(CA)n|Simple_repeat|Simple_repeat	18806	NM_001101597	638580	Mm.373655	NM_001101597		Gm7244	EG638580	predicted gene 7244	protein-coding
ALL_peak_62880	NO	YES	chr2	24941302	24941874	chr2.24941302	+	29.0105	NA	Intergenic	B1_Mus2|SINE|Alu	-6307	NR_027876	215705	Mm.45275	NM_178408	ENSMUSG00000026972	Arrdc1	AI957342|BC004091	arrestin domain containing 1	protein-coding
ALL_peak_26261	NO	YES	chr12	78768847	78769313	chr12.78768847	+	28.8196	NA	intron (NM_019579, intron 1 of 14)	(TG)n|Simple_repeat|Simple_repeat	20133	NM_019579	56217	Mm.425777	NM_019579	ENSMUSG00000021112	Mpp5	3830420B02Rik|AI255216|AI644496|Pals1	membrane protein, palmitoylated 5 (MAGUK p55 subfamily member 5)	protein-coding
ALL_peak_18109	NO	YES	chr11	43410450	43411071	chr11.43410450	+	26.5827	NA	Intergenic	Intergenic	15221	NM_013917	30939	Mm.6856	NM_013917	ENSMUSG00000020415	Pttg1	AW555095|C87862|Pttg|Pttg3	pituitary tumor-transforming gene 1	protein-coding
ALL_peak_104883	NO	YES	chr7	80778646	80779335	chr7.80778646	+	26.2504	NA	intron (NM_016721, intron 2 of 37)	intron (NM_016721, intron 2 of 37)	24341	NM_016721	29875	Mm.207619	NM_016721	ENSMUSG00000030536	Iqgap1	AA682088|D7Ertd237e|D7Ertd257e|mKIAA0051	IQ motif containing GTPase activating protein 1	protein-coding
ALL_peak_86962	NO	YES	chr5	28328847	28329199	chr5.28328847	+	25.5858	NA	intron (NM_028234, intron 1 of 18)	(CA)n|Simple_repeat|Simple_repeat	11834	NM_028234	381626	Mm.304075	NM_028234	ENSMUSG00000048271	Rbm33	3200001K10Rik|6430512A10Rik|AA386890|Prr8	RNA binding motif protein 33	protein-coding
ALL_peak_65082	NO	YES	chr2	71813126	71813502	chr2.71813126	+	24.9213	NA	intron (NM_001277970, intron 1 of 24)	(GA)n|Simple_repeat|Simple_repeat	26375	NM_001277970	16403	Mm.225096	NM_008397		Itga6	5033401O05Rik|AI115430|Cd49f|VLA-6	integrin alpha 6	protein-coding
ALL_peak_7361	NO	YES	chr1	149961398	149961738	chr1.149961398	+	24.2567	NA	promoter-TSS (NM_008869)	promoter-TSS (NM_008869)	-278	NM_008869	18783	Mm.4186	NM_008869	ENSMUSG00000056220	Pla2g4a	Pla2g4|cPLA2|cPLA2-alpha|cPLA2alpha	phospholipase A2, group IVA (cytosolic, calcium-dependent)	protein-coding
ALL_peak_120094	NO	YES	chr9	108144398	108144799	chr9.108144398	+	24.1713	NA	intron (NM_007567, intron 1 of 11)	(TG)n|Simple_repeat|Simple_repeat	7743	NR_126077	76873	Mm.436935	NR_126077	ENSMUSG00000102224	4930447F24Rik	-	RIKEN cDNA 4930447F24 gene	ncRNA
ALL_peak_117407	NO	YES	chr9	57973802	57974138	chr9.57973802	+	23.9244	NA	Intergenic	(TG)n|Simple_repeat|Simple_repeat	33835	NM_011352	20361	Mm.335187	NM_011352	ENSMUSG00000038264	Sema7a	2900057C09Rik|CDw108|H-Sema-L|M-Sema-L|Semal	sema domain, immunoglobulin domain (Ig), and GPI membrane anchor, (semaphorin) 7A	protein-coding
ALL_peak_103741	NO	YES	chr7	58675855	58676189	chr7.58675855	+	23.9244	NA	intron (NM_009728, intron 1 of 20)	(TG)n|Simple_repeat|Simple_repeat	17820	NM_009728	11982	Mm.135129	NM_009728	ENSMUSG00000025324	Atp10a	Atp10c|pfatp	ATPase, class V, type 10A	protein-coding
ALL_peak_92704	NO	YES	chr5	137345745	137346074	chr5.137345745	+	23.5921	NA	Intergenic	(CA)n|Simple_repeat|Simple_repeat	-4200	NM_010144	13846	Mm.34533	NM_010144	ENSMUSG00000029710	Ephb4	AI042935|Htk|MDK2|Myk1|Tyro11	Eph receptor B4	protein-coding
ALL_peak_114275	NO	YES	chr8	119668463	119668826	chr8.119668463	+	23.4298	NA	intron (NM_023395, intron 1 of 6)	intron (NM_023395, intron 1 of 6)	2279	NM_023395	67866	Mm.87599	NM_023395	ENSMUSG00000023336	Wfdc1	2310058A03Rik|ps20	WAP four-disulfide core domain 1	protein-coding
ALL_peak_65068	NO	YES	chr2	71644077	71644407	chr2.71644077	+	23.2599	NA	intron (NR_039557, intron 2 of 3).2	(CA)n|Simple_repeat|Simple_repeat	-75175	NR_037979	381371	Mm.330284	NM_201366	ENSMUSG00000064263	Platr26	Gm1631	pluripotency associated transcript 26	ncRNA
ALL_peak_22425	NO	YES	chr11	120355043	120355431	chr11.120355043	+	23.0158	NA	Intergenic	(CA)n|Simple_repeat|Simple_repeat	-6297	NM_172802	238021	Mm.481403	NM_172802	ENSMUSG00000025380	Fscn2	A930022G03|Ahl8|C630046B20Rik	fascin homolog 2, actin-bundling protein, retinal (Strongylocentrotus purpuratus)	protein-coding
ALL_peak_50852	NO	YES	chr17	29095152	29095586	chr17.29095152	+	22.9781	NA	intron (NM_007669, intron 1 of 2)	CpG	1600	NM_007669	12575	Mm.195663	NM_007669	ENSMUSG00000023067	Cdkn1a	CAP20|CDKI|CIP1|Cdkn1|P21|SDI1|Waf1|mda6|p21Cip1|p21WAF	cyclin-dependent kinase inhibitor 1A (P21)	protein-coding
ALL_peak_86821	NO	YES	chr5	24969055	24969449	chr5.24969055	+	22.8824	NA	intron (NM_145401, intron 3 of 15)	(CA)n|Simple_repeat|Simple_repeat	26501	NM_001310480	108099	Mm.33649	NM_145401	ENSMUSG00000028944	Prkag2	2410051C13Rik|AAKG|AAKG2|AI854673|H91620p|WPWS	protein kinase, AMP-activated, gamma 2 non-catalytic subunit	protein-coding
ALL_peak_72791	NO	YES	chr3	52102031	52102383	chr3.52102031	+	22.6218	NA	intron (NM_001004176, intron 1 of 4)	G-rich|Low_complexity|Low_complexity	2799	NM_001004176	433586	Mm.234972	NM_001004176	ENSMUSG00000061143	Maml3	AV234550|BC049812|Mam-2|mKIAA1816	mastermind like 3 (Drosophila)	protein-coding
ALL_peak_29381	NO	YES	chr13	24260914	24261222	chr13.24260914	+	22.263	NA	intron (NM_001311122, intron 2 of 37)	(TG)n|Simple_repeat|Simple_repeat	19722	NM_001311122	68732	Mm.211047	NM_026825	ENSMUSG00000021338	Lrrc16a	1110037D04Rik|AI425970|CARMIL|D130057M20|Lrrc16	leucine rich repeat containing 16A	protein-coding
ALL_peak_111094	NO	YES	chr8	61606589	61607166	chr8.61606589	+	21.5984	NA	intron (NM_001293772, intron 10 of 21)	intron (NM_001293772, intron 10 of 21)	-15708	NM_001293774	72333	Mm.29933	NM_001081390	ENSMUSG00000058056	Palld	2410003B16Rik|6030492A02	palladin, cytoskeletal associated protein	protein-coding
ALL_peak_100342	NO	YES	chr6	136914348	136914677	chr6.136914348	+	21.2662	NA	intron (NM_026983, intron 3 of 6)	(CA)n|Simple_repeat|Simple_repeat	7668	NM_026983	69187	Mm.33692	NM_026983	ENSMUSG00000030219	Erp27	1810033M07Rik|1810047B09Rik	endoplasmic reticulum protein 27	protein-coding
ALL_peak_67651	NO	YES	chr2	126950544	126950977	chr2.126950544	+	20.9339	NA	Intergenic	B1_Mus2|SINE|Alu	-17525	NM_023220	66552	Mm.269928	NM_023220	ENSMUSG00000027366	Sppl2a	2010106G01Rik|C130089K23Rik	signal peptide peptidase like 2A	protein-coding
ALL_peak_50702	NO	YES	chr17	26237889	26238606	chr17.26237889	+	20.9339	NA	intron (NM_001206335, intron 1 of 12)	IMPB_01|Satellite|Satellite	5995	NM_001206335	106581	Mm.28844	NM_207217	ENSMUSG00000024187	Fam234a	Itfg3	family with sequence similarity 234, member A	protein-coding
ALL_peak_74793	NO	YES	chr3	93554766	93555154	chr3.93554766	+	20.9339	NA	promoter-TSS (NM_009112)	promoter-TSS (NM_009112)	-157	NM_009112	20194	Mm.1	NM_009112	ENSMUSG00000041959	S100a10	42C|AA409961|AL024248|CAL12|CLP11|Cal1l|p10|p11	S100 calcium binding protein A10 (calpactin)	protein-coding
ALL_peak_120646	NO	YES	chr9	116873238	116873576	chr9.116873238	+	20.8055	NA	intron (NM_001172122, intron 4 of 13)	(CGTG)n|Simple_repeat|Simple_repeat	379076	NM_001172122	207181	Mm.326411	NM_178660	ENSMUSG00000039607	Rbms3	6720477E09Rik|8430436O14Rik	RNA binding motif, single stranded interacting protein	protein-coding
ALL_peak_96661	NO	YES	chr6	65671202	65671644	chr6.65671202	+	20.7351	NA	promoter-TSS (NM_172399)	promoter-TSS (NM_172399)	-188	NM_172399	68169	Mm.52392	NM_172399	ENSMUSG00000049001	Ndnf	A930038C07Rik|epidermacan	neuron-derived neurotrophic factor	protein-coding
ALL_peak_71753	NO	YES	chr3	31078799	31080097	chr3.31078799	+	20.3043	NA	Intergenic	(CA)n|Simple_repeat|Simple_repeat	-15610	NM_001039090	20482	Mm.15406	NM_011386	ENSMUSG00000027660	Skil	Skir|SnoN|sno	SKI-like	protein-coding
ALL_peak_102384	NO	YES	chr7	29253982	29254499	chr7.29253982	+	20.2693	NA	Intergenic	(CA)n|Simple_repeat|Simple_repeat	-5773	NM_028179	72275	Mm.441142	NM_028179		2200002D01Rik	2010005J02Rik|H2RSP|IMUP|IMUP-1|IMUP-2	RIKEN cDNA 2200002D01 gene	protein-coding
ALL_peak_109100	NO	YES	chr8	24420720	24421071	chr8.24420720	+	20.0566	NA	Intergenic	(CA)n|Simple_repeat|Simple_repeat	18051	NM_026931	69068	Mm.25775	NM_026931		1810011O10Rik	1110065B09Rik|AW121743|AW321058	RIKEN cDNA 1810011O10 gene	protein-coding
ALL_peak_49142	NO	YES	chr16	90402399	90402722	chr16.90402399	+	19.937	NA	intron (NM_015755, intron 1 of 10)	(TG)n|Simple_repeat|Simple_repeat	16163	NM_015755	26559	Mm.125874	NM_015755	ENSMUSG00000053414	Hunk	Bstk1|Mak-v	hormonally upregulated Neu-associated kinase	protein-coding
ALL_peak_69724	NO	YES	chr2	167367459	167367866	chr2.167367459	+	19.7324	NA	Intergenic	(CA)n|Simple_repeat|Simple_repeat	-18484	NM_019835	56336	Mm.200886	NM_019835	ENSMUSG00000017929	B4galt5	9430078I07Rik|AW049941|AW539721	UDP-Gal:betaGlcNAc beta 1,4-galactosyltransferase, polypeptide 5	protein-coding
ALL_peak_1942	NO	YES	chr1	44552591	44552998	chr1.44552591	+	19.4545	NA	intron (NM_028450, intron 1 of 10)	(CA)n|Simple_repeat|Simple_repeat	1123	NM_028450	70676	Mm.133132	NM_027506	ENSMUSG00000056870	Gulp1	3110030A04Rik|5730529O06Rik|CED-6|Ced6|GULP|Gulp-2	GULP, engulfment adaptor PTB domain containing 1	protein-coding
ALL_peak_84772	NO	YES	chr4	137875879	137876216	chr4.137875879	+	18.9402	NA	intron (NM_199307, intron 1 of 19)	(TG)n|Simple_repeat|Simple_repeat	13810	NM_199307	230857	Mm.401062	NM_199307	ENSMUSG00000057530	Ece1	AW322500|ECE-1|ECE-1a|ECE-1b|ECE-1d	endothelin converting enzyme 1	protein-coding
ALL_peak_65052	NO	YES	chr2	71542665	71542953	chr2.71542665	+	18.9402	NA	TTS (NM_010054)	TTS (NM_010054)	3945	NM_010054	13392	Mm.3896	NM_010054	ENSMUSG00000023391	Dlx2	AW121999|Dlx-2|Tes-1	distal-less homeobox 2	protein-coding
ALL_peak_73434	NO	YES	chr3	65529462	65529867	chr3.65529462	+	18.9402	NA	promoter-TSS (NR_027955)	promoter-TSS (NR_027955)	-250	NR_027955	71004	Mm.475465	NM_001033527	ENSMUSG00000074580	4931440P22Rik	-	RIKEN cDNA 4931440P22 gene	ncRNA
ALL_peak_71724	NO	YES	chr3	30509357	30509800	chr3.30509357	+	18.6125	NA	promoter-TSS (NM_021442)	promoter-TSS (NM_021442)	-91	NM_021442	14013	Mm.56965	NM_007963	ENSMUSG00000027684	Mecom	D630039M04Rik|Evi-1|Evi1|Jbo|Mds|Mds1|Mds1-Evi1|Prdm3|Znfpr1b1	MDS1 and EVI1 complex locus	protein-coding
ALL_peak_101690	NO	YES	chr7	16207745	16208585	chr7.16207745	+	18.6079	NA	intron (NM_027883, intron 7 of 16)	intron (NM_027883, intron 7 of 16)	13828	NM_001285931	71723	Mm.75259	NM_027883	ENSMUSG00000006019	Dhx34	1200013B07Rik|1810012L18Rik|Ddx34|mKIAA0134	DEAH (Asp-Glu-Ala-His) box polypeptide 34	protein-coding
ALL_peak_91487	NO	YES	chr5	118465127	118465540	chr5.118465127	+	18.6079	NA	Intergenic	Intergenic	-95386	NM_172424	76199	Mm.206238	NM_172424	ENSMUSG00000018076	Med13l	2210413I17Rik|6330591G05Rik|9030618F05Rik|Thrap2|Trap240L|mKIAA1025	mediator complex subunit 13-like	protein-coding
ALL_peak_67136	NO	YES	chr2	117120108	117120515	chr2.117120108	+	18.414	NA	promoter-TSS (NM_001277256)	promoter-TSS (NM_001277256)	-760	NM_001277256	114715	Mm.245890	NM_033524	ENSMUSG00000027351	Spred1	5730461F13Rik|AL024345|AW047647	sprouty protein with EVH-1 domain 1, related sequence	protein-coding
ALL_peak_51159	NO	YES	chr17	35079320	35079934	chr17.35079320	+	18.414	NA	TTS (NM_027366)	TTS (NM_027366)	2685	NM_027366	70274	Mm.250491	NM_027366	ENSMUSG00000013766	Ly6g6e	2310011I02Rik|G6e	lymphocyte antigen 6 complex, locus G6E	protein-coding
ALL_peak_68592	NO	YES	chr2	146511253	146511577	chr2.146511253	+	18.2834	NA	intron (NM_001033348, intron 1 of 40)	(TG)n|Simple_repeat|Simple_repeat	589	NM_001033348	241694	Mm.222310	NM_001033348	ENSMUSG00000037110	Ralgapa2	A230067G21Rik|AS250|BC053994|RGC2|pp250	Ral GTPase activating protein, alpha subunit 2 (catalytic)	protein-coding
ALL_peak_59375	NO	YES	chr19	18729754	18730272	chr19.18729754	+	18.2756	NA	Intergenic	Intergenic	16777	NM_177640	225995	Mm.28101	NM_177640	ENSMUSG00000047044	D030056L22Rik	-	RIKEN cDNA D030056L22 gene	protein-coding
ALL_peak_58792	NO	YES	chr19	5814671	5815116	chr19.5814671	+	18.2756	NA	Intergenic	RMER12|LTR|ERVK	-12222	NR_002847	72289	Mm.298256	NR_002847	ENSMUSG00000092341	Malat1	2210401K01Rik|9430072K23Rik|AI647968|Neat2	metastasis associated lung adenocarcinoma transcript 1 (non-coding RNA)	ncRNA
ALL_peak_107376	NO	YES	chr7	130648265	130648577	chr7.130648265	+	18.2756	NA	intron (NM_001004468, intron 3 of 21)	(GA)n|Simple_repeat|Simple_repeat	-44135	NM_021314	57752	Mm.86322	NM_021314	ENSMUSG00000030852	Tacc2	mKIAA4180	transforming, acidic coiled-coil containing protein 2	protein-coding
ALL_peak_58793	NO	YES	chr19	5815714	5816113	chr19.5815714	+	18.2756	NA	Intergenic	(CA)n|Simple_repeat|Simple_repeat	-13242	NR_002847	72289	Mm.298256	NR_002847	ENSMUSG00000092341	Malat1	2210401K01Rik|9430072K23Rik|AI647968|Neat2	metastasis associated lung adenocarcinoma transcript 1 (non-coding RNA)	ncRNA
ALL_peak_21227	NO	YES	chr11	101175853	101176339	chr11.101175853	+	18.1665	NA	promoter-TSS (NM_016782)	promoter-TSS (NM_016782)	-21	NM_016782	53321	Mm.474527	NM_016782	ENSMUSG00000017167	Cntnap1	AI841080|Caspr|NCP1|Nrxn4|p190|shm	contactin associated protein-like 1	protein-coding
ALL_peak_117395	NO	YES	chr9	57696413	57696924	chr9.57696413	+	17.9735	NA	promoter-TSS (NM_001136059)	promoter-TSS (NM_001136059)	-945	NM_001136059	13076	Mm.14089	NM_009992	ENSMUSG00000032315	Cyp1a1	AHH|AHRR|CP11|Cyp1a2|P450-1	cytochrome P450, family 1, subfamily a, polypeptide 1	protein-coding
ALL_peak_104058	NO	YES	chr7	65455380	65455776	chr7.65455380	+	17.611	NA	Intergenic	(TC)n|Simple_repeat|Simple_repeat	-84334	NM_009386	21872	Mm.4342	NM_009386	ENSMUSG00000030516	Tjp1	ZO1	tight junction protein 1	protein-coding
ALL_peak_62704	NO	YES	chr2	20519914	20520250	chr2.20519914	+	17.4616	NA	intron (NM_178059, intron 2 of 18)	(TG)n|Simple_repeat|Simple_repeat	569	NM_001177631	208618	Mm.237935	NM_029895	ENSMUSG00000036617	Etl4	6620402G01Rik|9430077C05Rik|BC026657|E330027G05Rik|Etl-4|Skt	enhancer trap locus 4	protein-coding
ALL_peak_93053	NO	YES	chr5	142557315	142557622	chr5.142557315	+	17.4262	NA	Intergenic	(CA)n|Simple_repeat|Simple_repeat	-6370	NM_001289588	231858	Mm.33766	NM_178702	ENSMUSG00000029576	Radil	AI536456|D930005D10Rik	Ras association and DIL domains	protein-coding
ALL_peak_4960	NO	YES	chr1	105867265	105867952	chr1.105867265	+	17.3067	NA	Intergenic	(TG)n|Simple_repeat|Simple_repeat	86885	NM_009399	21934	Mm.6251	NM_009399	ENSMUSG00000026321	Tnfrsf11a	Ly109|ODFR|OFE|Rank|TRANCE-R|mRANK	tumor necrosis factor receptor superfamily, member 11a, NFKB activator	protein-coding
ALL_peak_81968	NO	YES	chr4	82512772	82513209	chr4.82512772	+	17.2891	NA	Intergenic	(TG)n|Simple_repeat|Simple_repeat	-7211	NM_001113210	18028	Mm.317947	NM_008687	ENSMUSG00000008575	Nfib	6720429L07Rik|CTF|E030026I10Rik|NF-I/B|NF1-B|NFI-B	nuclear factor I/B	protein-coding
ALL_peak_92517	NO	YES	chr5	134966066	134966363	chr5.134966066	+	17.2891	NA	Intergenic	(TG)n|Simple_repeat|Simple_repeat	-19280	NM_009903	12740	Mm.7339	NM_009903	ENSMUSG00000047501	Cldn4	Cep-r|Cpetr|Cpetr1	claudin 4	protein-coding
ALL_peak_62085	NO	YES	chr2	8729743	8730209	chr2.8729743	+	17.2787	NA	Intergenic	(CA)n|Simple_repeat|Simple_repeat	-459539	NR_038180	73438	Mm.23558	NR_038180	ENSMUSG00000085580	1700061F12Rik	-	RIKEN cDNA 1700061F12 gene	ncRNA
ALL_peak_62720	NO	YES	chr2	20934633	20934940	chr2.20934633	+	17.0974	NA	intron (NM_001081364, intron 1 of 23)	(CGTG)n|Simple_repeat|Simple_repeat	32935	NM_001128084	71435	Mm.28507	NM_001081364	ENSMUSG00000036591	Arhgap21	5530401C11Rik|AA416458|ARHGAP10	Rho GTPase activating protein 21	protein-coding
ALL_peak_106297	NO	YES	chr7	110668189	110668477	chr7.110668189	+	16.9465	NA	Intergenic	(CA)n|Simple_repeat|Simple_repeat	40664	NM_009627	11535	Mm.1408	NM_009627	ENSMUSG00000030790	Adm	AM	adrenomedullin	protein-coding
ALL_peak_38651	NO	YES	chr14	99579317	99580039	chr14.99579317	+	16.9465	NA	Intergenic	Intergenic	280987	NM_009769	12224	Mm.30262	NM_009769	ENSMUSG00000005148	Klf5	4930520J07Rik|Bteb2|CKLF|IKLF	Kruppel-like factor 5	protein-coding
ALL_peak_84679	NO	YES	chr4	136434001	136434379	chr4.136434001	+	16.9465	NA	intron (NM_001285484, intron 1 of 1)	(CA)n|Simple_repeat|Simple_repeat	9578	NM_001285484	15552	Mm.40573	NM_008309	ENSMUSG00000070687	Htr1d	5-HT-1D|5-HT1D|AI853647|Gpcr14|Htr1db	5-hydroxytryptamine (serotonin) receptor 1D	protein-coding
ALL_peak_109704	NO	YES	chr8	35515888	35516189	chr8.35515888	+	16.9465	NA	Intergenic	(TG)n|Simple_repeat|Simple_repeat	-20505	NM_026067	67276	Mm.207534	NM_026067	ENSMUSG00000031527	Eri1	3'hexo|3110010F15Rik|Thex1|eri-1	exoribonuclease 1	protein-coding
ALL_peak_12141	NO	YES	chr10	54073632	54073979	chr10.54073632	+	16.9465	NA	intron (NM_008548, intron 2 of 12)	(TG)n|Simple_repeat|Simple_repeat	1991	NM_008548	17155	Mm.117294	NM_008548	ENSMUSG00000003746	Man1a	Man1a1|PCR1	mannosidase 1, alpha	protein-coding
ALL_peak_20186	NO	YES	chr11	83849394	83849723	chr11.83849394	+	16.9202	NA	Intergenic	(TG)n|Simple_repeat|Simple_repeat	-1311	NM_009330	21410	Mm.7226	NM_009330	ENSMUSG00000020679	Hnf1b	HNF-1-beta|HNF-1B|HNF-1Beta|Hnf1beta|LFB3|Tcf-2|Tcf2|vHNF1	HNF1 homeobox B	protein-coding
ALL_peak_66106	NO	YES	chr2	94405527	94405836	chr2.94405527	+	16.7339	NA	intron (NM_183106, intron 1 of 24)	(CA)n|Simple_repeat|Simple_repeat	1008	NM_183106	74569	Mm.248504	NM_183106	ENSMUSG00000027194	Ttc17	9130020K17Rik|D2Bwg1005e	tetratricopeptide repeat domain 17	protein-coding
ALL_peak_95034	NO	YES	chr6	31563971	31564283	chr6.31563971	+	16.6142	NA	promoter-TSS (NM_013723)	promoter-TSS (NM_013723)	-190	NM_013723	27205	Mm.89918	NM_013723	ENSMUSG00000025608	Podxl	AW121214|Ly102|PC|PCLP-1|Pclp1	podocalyxin-like	protein-coding
ALL_peak_44019	NO	YES	chr15	88851688	88851993	chr15.88851688	+	16.6142	NA	Intergenic	Intergenic	-10354	NM_145478	223775	Mm.400129	NM_145478	ENSMUSG00000035828	Pim3	BC026639|Kid1	proviral integration site 3	protein-coding
ALL_peak_26602	NO	YES	chr12	85527169	85527705	chr12.85527169	+	16.607	NA	Intergenic	(TG)n|Simple_repeat|Simple_repeat	53536	NM_010234	14281	Mm.246513	NM_010234	ENSMUSG00000021250	Fos	D12Rfj1|c-fos|cFos	FBJ osteosarcoma oncogene	protein-coding
ALL_peak_25190	NO	YES	chr12	57622752	57623142	chr12.57622752	+	16.386	NA	intron (NM_001312644, intron 5 of 31)	(CA)n|Simple_repeat|Simple_repeat	-4345	NR_131110	78758	Mm.160125	NR_131110	ENSMUSG00000085851	4921518K17Rik	-	RIKEN cDNA 4921518K17 gene	ncRNA
ALL_peak_14571	NO	YES	chr10	99047342	99047792	chr10.99047342	+	16.2819	NA	Intergenic	(GA)n|Simple_repeat|Simple_repeat	-59604	NM_027740	382406	Mm.440656	NM_027740	ENSMUSG00000019952	Poc1b	4933430F16Rik|Wdr51b	POC1 centriolar protein homolog B (Chlamydomonas)	protein-coding
ALL_peak_77258	NO	YES	chr3	142493591	142493980	chr3.142493591	+	16.2819	NA	Intergenic	Intergenic	-3149	NM_153564	229898	Mm.459245	NM_153564	ENSMUSG00000040264	Gbp5	5330409J06Rik|Gbp5a	guanylate binding protein 5	protein-coding
ALL_peak_82899	NO	YES	chr4	103249329	103249906	chr4.103249329	+	16.2819	NA	intron (NM_001163494, intron 4 of 7)	intron (NM_001163494, intron 4 of 7)	-34733	NM_177732	242585	Mm.281800	NM_177732		Slc35d1	AI834976|C330011J09|UGTREL7|mKIAA0260	solute carrier family 35 (UDP-glucuronic acid/UDP-N-acetylgalactosamine dual transporter), member D1	protein-coding
ALL_peak_55145	NO	YES	chr18	20555091	20555405	chr18.20555091	+	16.2819	NA	Intergenic	(TC)n|Simple_repeat|Simple_repeat	-2868	NM_007883	13511	Mm.345891	NM_007883	ENSMUSG00000044393	Dsg2	AA408168|D18Ertd293e	desmoglein 2	protein-coding
ALL_peak_19000	NO	YES	chr11	60417169	60417582	chr11.60417169	+	16.1169	NA	promoter-TSS (NM_145427)	promoter-TSS (NM_145427)	230	NM_025757	66771	Mm.29950	NM_025757	ENSMUSG00000018415	Gid4	4933439F18Rik	GID complex subunit 4, VID24 homolog (S. cerevisiae)	protein-coding
ALL_peak_99918	NO	YES	chr6	128839758	128840165	chr6.128839758	+	16.1142	NA	Intergenic	(TG)n|Simple_repeat|Simple_repeat	-13646	NM_030599	80782	Mm.6180	NM_030599	ENSMUSG00000079298	Klrb1b	Klrb1d|Ly55b|Ly55d|NKR-P1B|NKR-P1D|Nkrp1-b|Nkrp1d	killer cell lectin-like receptor subfamily B member 1B	protein-coding
ALL_peak_108429	NO	YES	chr8	10866873	10867190	chr8.10866873	+	15.9496	NA	Intergenic	Intergenic	15423	NR_040705	320014	Mm.403203	NR_040705		B930025P03Rik	-	RIKEN cDNA B930025P03 gene	ncRNA
ALL_peak_60881	NO	YES	chr19	47539133	47539452	chr19.47539133	+	15.9496	NA	Intergenic	(TG)n|Simple_repeat|Simple_repeat	-2272	NM_175360	108689	Mm.218048	NM_175360	ENSMUSG00000042694	Obfc1	0610009H20Rik|2310057J23Rik|AAF-44|AAF44|AI413458|RPA-32	oligonucleotide/oligosaccharide-binding fold containing 1	protein-coding
ALL_peak_77800	NO	YES	chr3	152170900	152171221	chr3.152170900	+	15.7822	NA	Intergenic	(TG)n|Simple_repeat|Simple_repeat	-5160	NM_016867	54120	Mm.97	NM_016867		Gipc2	2200002N01Rik|AU021850|Semcap2	GIPC PDZ domain containing family, member 2	protein-coding
ALL_peak_56716	NO	YES	chr18	53267538	53267877	chr18.53267538	+	15.6173	NA	intron (NM_029394, intron 1 of 6)	(CA)n|Simple_repeat|Simple_repeat	22045	NM_029394	69226	Mm.32414	NM_029394	ENSMUSG00000024535	Snx24	2810011K15Rik|5730433I16Rik|AI451341	sorting nexing 24	protein-coding
ALL_peak_19409	NO	YES	chr11	69123579	69123906	chr11.69123579	+	15.6173	NA	TTS (NM_033041)	TTS (NM_033041)	-2635	NM_011786	23801	Mm.41989	NM_011786	ENSMUSG00000020892	Aloxe3	e-LOX-3|eLOX-3	arachidonate lipoxygenase 3	protein-coding
ALL_peak_33102	NO	YES	chr13	104037700	104038050	chr13.104037700	+	15.6173	NA	intron (NM_029447, intron 9 of 12)	(TG)n|Simple_repeat|Simple_repeat	71739	NM_029447	75805	Mm.127692	NM_029447	ENSMUSG00000021710	Nln	4930472G13Rik|C79345	neurolysin (metallopeptidase M3 family)	protein-coding
ALL_peak_18638	NO	YES	chr11	53904280	53904617	chr11.53904280	+	15.2851	NA	Intergenic	(TG)n|Simple_repeat|Simple_repeat	-12745	NM_011396	20520	Mm.42253	NM_011396	ENSMUSG00000018900	Slc22a5	Lstpl|Octn2|jvs	solute carrier family 22 (organic cation transporter), member 5	protein-coding
ALL_peak_92522	NO	YES	chr5	134983446	134983905	chr5.134983446	+	15.2851	NA	Intergenic	RLTR20A4|LTR|ERVK	-2539	NM_009902	12739	Mm.158662	NM_009902	ENSMUSG00000070473	Cldn3	AI182374|Cpetr2|mRVP1	claudin 3	protein-coding
ALL_peak_108457	NO	YES	chr8	11203456	11203767	chr8.11203456	+	15.2851	NA	intron (NM_009931, intron 49 of 51)	intron (NM_009931, intron 49 of 51)	-109194	NM_009932	12827	Mm.181021	NM_009932	ENSMUSG00000031503	Col4a2	Col4a-2	collagen, type IV, alpha 2	protein-coding
ALL_peak_37165	NO	YES	chr14	67940666	67941106	chr14.67940666	+	15.2851	NA	Intergenic	(TG)n|Simple_repeat|Simple_repeat	-7314	NM_177780	68813	Mm.258155	NM_177780	ENSMUSG00000044447	Dock5	1110060D06Rik|AI666732|AI956923|BC016533|E130320D18|lr2|rlc	dedicator of cytokinesis 5	protein-coding
ALL_peak_102604	NO	YES	chr7	34704543	34704833	chr7.34704543	+	15.2851	NA	intron (NM_175140, intron 2 of 3)	(TG)n|Simple_repeat|Simple_repeat	-51847	NM_146188	233107	Mm.486198	NM_146188	ENSMUSG00000030499	Kctd15	BC031749	potassium channel tetramerisation domain containing 15	protein-coding
ALL_peak_20839	NO	YES	chr11	95414043	95414371	chr11.95414043	+	15.255	NA	intron (NM_025287, intron 1 of 10)	(TG)n|Simple_repeat|Simple_repeat	124	NM_025287	20747	Mm.285454	NM_025287	ENSMUSG00000057522	Spop	AI315626|Pcif1|TEF2	speckle-type POZ protein	protein-coding
ALL_peak_25744	NO	YES	chr12	69386103	69386512	chr12.69386103	+	15.2378	NA	Intergenic	(TG)n|Simple_repeat|Simple_repeat	14157	NM_007481	11845	Mm.27308	NM_007481	ENSMUSG00000044147	Arf6	AI788669|AW496366	ADP-ribosylation factor 6	protein-coding
ALL_peak_44046	NO	YES	chr15	89480317	89480714	chr15.89480317	+	15.2378	NA	intron (NR_077233, intron 4 of 4)	(CA)n|Simple_repeat|Simple_repeat	-3091	NM_009713	11883	Mm.620	NM_009713	ENSMUSG00000022620	Arsa	AS-A|ASA|AW212749|As-2|As2|TISP73	arylsulfatase A	protein-coding
ALL_peak_113371	NO	YES	chr8	104963398	104963719	chr8.104963398	+	15.1845	NA	intron (NM_197999, intron 2 of 11)	intron (NM_197999, intron 2 of 11)	1840	NM_197999	72361	Mm.26580	NM_197999	ENSMUSG00000031877	Ces2g	2210023G05Rik|Ces2l	carboxylesterase 2G	protein-coding
ALL_peak_13322	NO	YES	chr10	75780193	75780518	chr10.75780193	+	15.1845	NA	intron (NM_133994, intron 1 of 4)	(CA)n|Simple_repeat|Simple_repeat	1059	NM_133994	103140	Mm.5731	NM_133994	ENSMUSG00000001665	Gstt3	AI118089	glutathione S-transferase, theta 3	protein-coding
ALL_peak_70987	NO	YES	chr3	14880854	14881413	chr3.14880854	+	15.0744	NA	Intergenic	Intergenic	-5293	NM_009801	12349	Mm.1186	NM_009801	ENSMUSG00000027562	Car2	AI131712|CAII|Ca2|Car-2|Ltw-5|Lvtw-5	carbonic anhydrase 2	protein-coding
ALL_peak_101871	NO	YES	chr7	19867678	19868009	chr7.19867678	+	15.0078	NA	Intergenic	(CA)n|Simple_repeat|Simple_repeat	-6544	NM_001033419	330483	Mm.260192	NM_001033419	ENSMUSG00000014686	Ceacam16	Gm769	carcinoembryonic antigen-related cell adhesion molecule 16	protein-coding
ALL_peak_105714	NO	YES	chr7	98962250	98962713	chr7.98962250	+	14.9528	NA	intron (NM_178635, intron 12 of 14)	intron (NM_178635, intron 12 of 14)	123636	NM_001285795	22411	Mm.22182	NM_009519	ENSMUSG00000015957	Wnt11	-	wingless-type MMTV integration site family, member 11	protein-coding
ALL_peak_12589	NO	YES	chr10	62412879	62413160	chr10.62412879	+	14.9528	NA	intron (NM_145419, intron 2 of 17)	intron (NM_145419, intron 2 of 17)	9438	NM_145419	216019	Mm.213213	NM_145419	ENSMUSG00000020080	Hkdc1	BC016235	hexokinase domain containing 1	protein-coding
ALL_peak_43563	NO	YES	chr15	79145394	79145724	chr15.79145394	+	14.9528	NA	intron (NM_027231, intron 2 of 4)	(TC)n|Simple_repeat|Simple_repeat	4192	NM_027231	69833	Mm.279861	NM_027231	ENSMUSG00000033020	Polr2f	1810060D16Rik	polymerase (RNA) II (DNA directed) polypeptide F	protein-coding
ALL_peak_46847	NO	YES	chr16	44601680	44601946	chr16.44601680	+	14.9528	NA	Intergenic	(TG)n|Simple_repeat|Simple_repeat	-42943	NM_172506	117606	Mm.41561	NM_172506	ENSMUSG00000022687	Boc	4732455C11|mFLJ00376	biregional cell adhesion molecule-related/down-regulated by oncogenes (Cdon) binding protein	protein-coding
ALL_peak_29714	NO	YES	chr13	31458759	31459058	chr13.31458759	+	14.9528	NA	Intergenic	(TG)n|Simple_repeat|Simple_repeat	-99262	NM_008239	15220	Mm.44235	NM_008239	ENSMUSG00000038415	Foxq1	HFH-1|Hfh1|Hfh1l|sa	forkhead box Q1	protein-coding
ALL_peak_68304	NO	YES	chr2	140848039	140848355	chr2.140848039	+	14.9528	NA	intron (NM_001013802, intron 4 of 18)	intron (NM_001013802, intron 4 of 18)	-176721	NM_178382	71436	Mm.426781	NM_178382	ENSMUSG00000051379	Flrt3	5530600M07Rik|C430047I10Rik|mKIAA1469	fibronectin leucine rich transmembrane protein 3	protein-coding
ALL_peak_93586	NO	YES	chr5	151165203	151165819	chr5.151165203	+	14.8746	NA	intron (NM_146258, intron 1 of 13)	intron (NM_146258, intron 1 of 13)	24682	NM_146258	243362	Mm.209272	NM_146258	ENSMUSG00000016128	Stard13	DLC2|GT650	StAR-related lipid transfer (START) domain containing 13	protein-coding
ALL_peak_21941	NO	YES	chr11	112781713	112782046	chr11.112781713	+	14.8641	NA	promoter-TSS (NM_011448)	promoter-TSS (NM_011448)	-331	NM_011448	20682	Mm.286407	NM_011448	ENSMUSG00000000567	Sox9	2010306G03Rik|AV220920|mKIAA4243	SRY (sex determining region Y)-box 9	protein-coding
ALL_peak_117941	NO	YES	chr9	67121786	67122113	chr9.67121786	+	14.7958	NA	Intergenic	(TG)n|Simple_repeat|Simple_repeat	-11612	NR_045748	100502636	Mm.412607	NR_045748		Gm19299	-	predicted gene, 19299	ncRNA
ALL_peak_26689	NO	YES	chr12	86834610	86834947	chr12.86834610	+	14.7958	NA	Intergenic	(TG)n|Simple_repeat|Simple_repeat	50036	NM_145836	238330	Mm.248358	NM_145836	ENSMUSG00000034168	Irf2bpl	6430527G18Rik|Eap1	interferon regulatory factor 2 binding protein-like	protein-coding
ALL_peak_120887	NO	YES	chr9	120476147	120476517	chr9.120476147	+	14.6518	NA	Intergenic	(CA)n|Simple_repeat|Simple_repeat	-16274	NM_026892	68969	Mm.28753	NM_026892	ENSMUSG00000006941	Eif1b	1500010M16Rik|3110001N14Rik|Gc20	eukaryotic translation initiation factor 1B	protein-coding
ALL_peak_90609	NO	YES	chr5	101802510	101802798	chr5.101802510	+	14.6205	NA	intron (NM_173370, intron 5 of 12)	(TG)n|Simple_repeat|Simple_repeat	37524	NM_173370	74596	Mm.46764	NM_173370	ENSMUSG00000029330	Cds1	4833409J18Rik|AI314024|AW125888	CDP-diacylglycerol synthase 1	protein-coding
ALL_peak_117442	NO	YES	chr9	58448322	58448763	chr9.58448322	+	14.6205	NA	Intergenic	(CA)n|Simple_repeat|Simple_repeat	-6631	NR_040736	74879	Mm.416924	NR_040736	ENSMUSG00000097651	4930461G14Rik	-	RIKEN cDNA 4930461G14 gene	ncRNA
ALL_peak_88714	NO	YES	chr5	65436456	65436786	chr5.65436456	+	14.5647	NA	promoter-TSS (NM_009466)	promoter-TSS (NM_009466)	-779	NM_009466	22235	Mm.344831	NM_009466	ENSMUSG00000029201	Ugdh	Udpgdh	UDP-glucose dehydrogenase	protein-coding
ALL_peak_88030	NO	YES	chr5	52113207	52113509	chr5.52113207	+	14.4407	NA	Intergenic	CpG	22659	NR_105845	102466648		NR_105845	ENSMUSG00000098726	Mir6417	Gm27334|mmu-mir-6417	microRNA 6417	ncRNA
ALL_peak_90035	NO	YES	chr5	90612528	90613004	chr5.90612528	+	14.3587	NA	intron (NM_001310656, intron 4 of 10)	(TG)n|Simple_repeat|Simple_repeat	27761	NM_001310656	73246	Mm.30172	NM_028478	ENSMUSG00000029370	Rassf6	1600016B17Rik	Ras association (RalGDS/AF-6) domain family member 6	protein-coding
ALL_peak_117041	NO	YES	chr9	50728065	50728541	chr9.50728065	+	14.3587	NA	promoter-TSS (NM_178118)	promoter-TSS (NM_178118)	-319	NM_178118	330938	Mm.82598	NM_178118	ENSMUSG00000032064	Dixdc1	4930563F16Rik|BC048182|Ccd1|Ccd1Aalpha1L|Ccd1Abeta1L|Ccd1BalphaL|Ccd1BbetaL|Ccd1CL|mKIAA1735	DIX domain containing 1	protein-coding
ALL_peak_22483	NO	YES	chr11	121705330	121705617	chr11.121705330	+	14.2882	NA	intron (NM_144797, intron 1 of 3)	(CA)n|Simple_repeat|Simple_repeat	3046	NM_144797	210029	Mm.153566	NM_144797		Metrnl	9430048M07Rik|BC019776	meteorin, glial cell differentiation regulator-like	protein-coding
ALL_peak_101868	NO	YES	chr7	19818532	19818879	chr7.19818532	+	14.2882	NA	intron (NM_033601, intron 2 of 8)	(TG)n|Simple_repeat|Simple_repeat	4050	NM_033601	12051	Mm.439658	NM_033601	ENSMUSG00000053175	Bcl3	AI528691|Bcl-3	B cell leukemia/lymphoma 3	protein-coding
ALL_peak_16116	NO	YES	chr10	127642914	127643200	chr10.127642914	+	14.2882	NA	promoter-TSS (NM_009284)	promoter-TSS (NM_009284)	71	NM_009284	20852	Mm.121721	NM_009284	ENSMUSG00000002147	Stat6	-	signal transducer and activator of transcription 6	protein-coding
ALL_peak_43879	NO	YES	chr15	85664023	85664313	chr15.85664023	+	14.2882	NA	Intergenic	RLTR20C1_MM|LTR|ERVK	-39605	NR_110483	102800312	Mm.33117	NR_110483		Lincppara	Mirlet7bhg|linc-Ppara	long intergenic noncoding RNA near Ppara	ncRNA
ALL_peak_111984	NO	YES	chr8	79027916	79028341	chr8.79027916	+	14.2882	NA	promoter-TSS (NM_178267)	promoter-TSS (NM_178267)	-309	NM_001294279	622675	Mm.48724	NM_178267	ENSMUSG00000071064	Zfp827	2810449M09Rik|D630040G17Rik|Znf827	zinc finger protein 827	protein-coding
ALL_peak_13594	NO	YES	chr10	81145683	81145992	chr10.81145683	+	14.2717	NA	intron (NM_010731, intron 2 of 2)	RLTR20C2_MM|LTR|ERVK	9566	NM_010731	16969	Mm.20920	NM_010731	ENSMUSG00000035011	Zbtb7a	9030619K07Rik|9130006G12Rik|AI452336|FBI-1|Lrf|Pokemon|Zbtb7	zinc finger and BTB domain containing 7a	protein-coding
ALL_peak_116705	NO	YES	chr9	45041073	45041374	chr9.45041073	+	14.136	NA	Intergenic	(TG)n|Simple_repeat|Simple_repeat	-1121	NM_007962	14012	Mm.33240	NM_007962	ENSMUSG00000032092	Mpzl2	Eva|Eva1	myelin protein zero-like 2	protein-coding
ALL_peak_69948	NO	YES	chr2	170147625	170147881	chr2.170147625	+	13.9559	NA	Intergenic	(CA)n|Simple_repeat|Simple_repeat	-5078	NM_001159683	228913	Mm.22858	NM_001033299	ENSMUSG00000052056	Zfp217	4933431C08Rik|AW987152|Gm562|ZABC1|Znf217	zinc finger protein 217	protein-coding
ALL_peak_22109	NO	YES	chr11	115340990	115341336	chr11.115340990	+	13.9559	NA	intron (NM_027132, intron 5 of 6)	(TC)n|Simple_repeat|Simple_repeat	6429	NM_027132	69602	Mm.101844	NM_027132	ENSMUSG00000018862	Otop3	2310011E08Rik	otopetrin 3	protein-coding
ALL_peak_84824	NO	YES	chr4	138702263	138702609	chr4.138702263	+	13.9559	NA	Intergenic	(CA)n|Simple_repeat|Simple_repeat	22420	NM_001285930	212190	Mm.292226	NM_178671	ENSMUSG00000043621	Ubxn10	5730509E04Rik|A830047D02|Ubxd3	UBX domain protein 10	protein-coding
ALL_peak_84419	NO	YES	chr4	132529270	132529593	chr4.132529270	+	13.9493	NA	Intergenic	(CA)n|Simple_repeat|Simple_repeat	5983	NM_007512	11983	Mm.2171	NM_007512	ENSMUSG00000054428	Atpif1	Atpi|IF(1)|If1	ATPase inhibitory factor 1	protein-coding
ALL_peak_20946	NO	YES	chr11	96863592	96863917	chr11.96863592	+	13.7022	NA	Intergenic	(CA)n|Simple_repeat|Simple_repeat	13361	NR_029562	387170		NR_029562	ENSMUSG00000065515	Mir152	Mirn152|mir-152|mmu-mir-152	microRNA 152	ncRNA
ALL_peak_92527	NO	YES	chr5	135001429	135001760	chr5.135001429	+	13.6236	NA	promoter-TSS (NR_026907)	promoter-TSS (NR_026907)	-244	NR_026907	71304	Mm.482317	NR_026907	ENSMUSG00000054909	Wbscr25	4933433J03Rik|4933439O14Rik	Williams Beuren syndrome chromosome region 25 (human)	ncRNA
ALL_peak_85428	NO	YES	chr4	148833040	148833397	chr4.148833040	+	13.6236	NA	intron (NM_001159344, intron 1 of 20)	(TG)n|Simple_repeat|Simple_repeat	28826	NM_001159344	69743	Mm.233879	NM_027195	ENSMUSG00000028977	Casz1	2410019P08Rik|AV096627|BC040081|Cst|D4Ertd432e	castor zinc finger 1	protein-coding
ALL_peak_84684	NO	YES	chr4	136462159	136462595	chr4.136462159	+	13.6236	NA	Intergenic	CpG	-7384	NM_024452	269593	Mm.485824	NM_024452	ENSMUSG00000001089	Luzp1	2700072H04Rik|AI266952|Luzp|mFLJ00226	leucine zipper protein 1	protein-coding
ALL_peak_114753	NO	YES	chr8	126829708	126830047	chr8.126829708	+	13.6236	NA	Intergenic	(CA)n|Simple_repeat|Simple_repeat	116044	NM_024214	67952	Mm.6932	NM_024214	ENSMUSG00000093904	Tomm20	1810060K07Rik|BB284719|Gm19268|MAS20|MOM19|TOM20|mKIAA0016	translocase of outer mitochondrial membrane 20 homolog (yeast)	protein-coding
ALL_peak_73439	NO	YES	chr3	65659259	65659663	chr3.65659259	+	13.4807	NA	TTS (NR_106200)	TTS (NR_106200)	173	NR_106200	102465905		NR_106200	ENSMUSG00000098944	Mir8120	Gm27637|mmu-mir-8120	microRNA 8120	ncRNA
ALL_peak_46169	NO	YES	chr16	30063997	30064437	chr16.30063997	+	13.4796	NA	Intergenic	CpG	-1140	NM_008235	15205	Mm.390859	NM_008235	ENSMUSG00000022528	Hes1	Hry|bHLHb39	hairy and enhancer of split 1 (Drosophila)	protein-coding
ALL_peak_105795	NO	YES	chr7	100494491	100494891	chr7.100494491	+	13.4796	NA	intron (NM_011671, intron 2 of 7)	(TG)n|Simple_repeat|Simple_repeat	1333	NM_011671	22228	Mm.171378	NM_011671		Ucp2	Slc25a8	uncoupling protein 2 (mitochondrial, proton carrier)	protein-coding
ALL_peak_35245	NO	YES	chr14	31205810	31206178	chr14.31205810	+	13.4788	NA	intron (NM_022656, intron 1 of 20)	intron (NM_022656, intron 1 of 20)	832	NM_022656	64652	Mm.298728	NM_022656	ENSMUSG00000021910	Nisch	1200007D05Rik|3202002H23Rik|AW494485|I-1	nischarin	protein-coding
ALL_peak_64524	NO	YES	chr2	60696756	60697065	chr2.60696756	+	13.4781	NA	intron (NM_001159564, intron 1 of 17)	(CA)n|Simple_repeat|Simple_repeat	-23217	NM_021359	16420	Mm.98193	NM_021359	ENSMUSG00000026971	Itgb6	2210409C20Rik|4831415H04Rik	integrin beta 6	protein-coding
ALL_peak_103184	NO	YES	chr7	46236080	46236537	chr7.46236080	+	13.3525	NA	intron (NM_001291182, intron 1 of 26)	(CA)n|Simple_repeat|Simple_repeat	2182	NM_001163733	72088	Mm.119709	NM_023649	ENSMUSG00000030838	Ush1c	2010016F01Rik|harmonin	Usher syndrome 1C	protein-coding
ALL_peak_100203	NO	YES	chr6	134947088	134947391	chr6.134947088	+	13.3252	NA	intron (NR_037956, intron 1 of 1)	(TC)n|Simple_repeat|Simple_repeat	18147	NR_037956	381822	Mm.5935	NR_037955	ENSMUSG00000098318	1190002F15Rik	AI120476	RIKEN cDNA 1190002F15 gene	ncRNA
ALL_peak_67221	NO	YES	chr2	118763674	118763960	chr2.118763674	+	13.3252	NA	Intergenic	(CA)n|Simple_repeat|Simple_repeat	-1156	NM_001001982	214239	Mm.379342	NM_001001982	ENSMUSG00000045838	A430105I19Rik	Gm353	RIKEN cDNA A430105I19 gene	protein-coding
ALL_peak_90068	NO	YES	chr5	91118576	91118833	chr5.91118576	+	13.2913	NA	Intergenic	(CA)n|Simple_repeat|Simple_repeat	-20895	NM_009704	11839	Mm.8039	NM_009704	ENSMUSG00000029378	Areg	AR|Mcub|Sdgf	amphiregulin	protein-coding
ALL_peak_27913	NO	YES	chr12	110444429	110444717	chr12.110444429	+	13.2913	NA	Intergenic	RMER15|LTR|ERVL	-2606	NM_001135001	26931	Mm.240396	NM_012023	ENSMUSG00000017843	Ppp2r5c	2610043M05Rik|2700063L20Rik|AI060890|AW545884|C85228|D12Bwg0916e|mKIAA0044	protein phosphatase 2, regulatory subunit B', gamma	protein-coding
ALL_peak_35263	NO	YES	chr14	31659667	31660020	chr14.31659667	+	13.2913	NA	intron (NM_025295, intron 1 of 3)	(CA)n|Simple_repeat|Simple_repeat	18786	NM_025295	26363	Mm.282679	NM_025295	ENSMUSG00000021900	Btd	-	biotinidase	protein-coding
ALL_peak_12902	NO	YES	chr10	68231083	68231393	chr10.68231083	+	13.2913	NA	intron (NM_023598, intron 3 of 9)	(CA)n|Simple_repeat|Simple_repeat	47488	NM_023598	71371	Mm.440357	NM_023598	ENSMUSG00000019947	Arid5b	4930580B11|5430435G07Rik|AI467247|Desrt|Mrf2|Mrf2alpha|Mrf2beta	AT rich interactive domain 5B (MRF1-like)	protein-coding
ALL_peak_20024	NO	YES	chr11	80855304	80855583	chr11.80855304	+	13.2913	NA	intron (NR_110449, intron 1 of 2)	(TG)n|Simple_repeat|Simple_repeat	2857	NR_110449	75043	Mm.410815	NR_110449	ENSMUSG00000086703	4930507D10Rik	-	RIKEN cDNA 4930507D10 gene	ncRNA
ALL_peak_98001	NO	YES	chr6	91683704	91684123	chr6.91683704	+	13.2374	NA	promoter-TSS (NM_009320)	promoter-TSS (NM_009320)	-154	NM_009320	21366	Mm.395650	NM_009320	ENSMUSG00000030096	Slc6a6	AA589629|C80501|Taut	solute carrier family 6 (neurotransmitter transporter, taurine), member 6	protein-coding
ALL_peak_58252	NO	YES	chr18	82718830	82719143	chr18.82718830	+	13.1866	NA	Intergenic	(CA)n|Simple_repeat|Simple_repeat	-1295	NR_039572	100628586		NR_039572	ENSMUSG00000092638	Mir5112	mmu-mir-5112|mu-mir-5112	microRNA 5112	ncRNA
ALL_peak_49300	NO	YES	chr16	92954531	92955312	chr16.92954531	+	13.1519	NA	Intergenic	(CAGA)n|Simple_repeat|Simple_repeat	-128847	NM_001111022	12394	Mm.4081	NM_009821	ENSMUSG00000022952	Runx1	AML1|CBF-alpha-2|Cbfa2|Pebp2a2|Pebpa2b	runt related transcription factor 1	protein-coding
ALL_peak_66019	NO	YES	chr2	92431058	92431383	chr2.92431058	+	13.1519	NA	intron (NM_009963, intron 1 of 11)	RLTR20A4|LTR|ERVK	2849	NM_009963	12953	Mm.254181	NM_009963	ENSMUSG00000068742	Cry2	AV006279|D130054K12Rik	cryptochrome 2 (photolyase-like)	protein-coding
ALL_peak_10903	NO	YES	chr10	26374705	26375028	chr10.26374705	+	13.1519	NA	intron (NM_172787, intron 1 of 21)	CpG	319	NM_172787	237339	Mm.338439	NM_172787	ENSMUSG00000039089	L3mbtl3	AI481284|MBT-1	l(3)mbt-like 3 (Drosophila)	protein-coding
ALL_peak_66828	NO	YES	chr2	110191635	110192397	chr2.110191635	+	13.0153	NA	Intergenic	Intergenic	113709	NM_130452	170442	Mm.27335	NM_130452		Bbox1	AI874739	butyrobetaine (gamma), 2-oxoglutarate dioxygenase 1 (gamma-butyrobetaine hydroxylase)	protein-coding
ALL_peak_37176	NO	YES	chr14	68101732	68102412	chr14.68101732	+	12.9968	NA	Intergenic	Intergenic	18188	NM_010910	18039	Mm.1956	NM_010910		Nefl	AI847934|CMT2E|NF-L|NF68|Nfl	neurofilament, light polypeptide	protein-coding
ALL_peak_56972	NO	YES	chr18	57858407	57858688	chr18.57858407	+	12.9591	NA	Intergenic	(TG)n|Simple_repeat|Simple_repeat	-20131	NM_009194	20496	Mm.399997	NM_009194	ENSMUSG00000024597	Slc12a2	9330166H04Rik|Nkcc1|mBSC2|sy-ns	solute carrier family 12, member 2	protein-coding
ALL_peak_87097	NO	YES	chr5	31576555	31576899	chr5.31576555	+	12.8936	NA	Intergenic	(TG)n|Simple_repeat|Simple_repeat	-5330	NR_102275	100740	Mm.23370	NR_102275		AI839979	-	expressed sequence AI839979	ncRNA
ALL_peak_15066	NO	YES	chr10	108420350	108420628	chr10.108420350	+	12.7054	NA	Intergenic	(TG)n|Simple_repeat|Simple_repeat	88300	NM_054056	114774	Mm.391419	NM_054056	ENSMUSG00000035873	Pawr	2310001G03Rik|PAR4|Par-4	PRKC, apoptosis, WT1, regulator	protein-coding
ALL_peak_51811	NO	YES	chr17	47003215	47003503	chr17.47003215	+	12.7054	NA	intron (NM_146078, intron 1 of 46)	(CA)n|Simple_repeat|Simple_repeat	7173	NM_146078	224826	Mm.28234	NM_146078	ENSMUSG00000023977	Ubr2	9930021A08Rik|AI462103|AW540746|E130209G04Rik|mKIAA0349	ubiquitin protein ligase E3 component n-recognin 2	protein-coding
ALL_peak_115697	NO	YES	chr9	22467378	22467641	chr9.22467378	+	12.6268	NA	intron (NM_018739, intron 1 of 5)	(CA)n|Simple_repeat|Simple_repeat	847	NM_018739	55934	Mm.38235	NM_018739	ENSMUSG00000032239	Rp9	PAP-1|Rp9h	retinitis pigmentosa 9 (human)	protein-coding
ALL_peak_20852	NO	YES	chr11	95713885	95714169	chr11.95713885	+	12.6268	NA	Intergenic	(CA)n|Simple_repeat|Simple_repeat	-1273	NR_045780	432396	Mm.426849	NR_045780	ENSMUSG00000086191	Zfp652os	1110035M17Rik	zinc finger protein 652, opposite strand	ncRNA
ALL_peak_78453	NO	YES	chr4	8516849	8517122	chr4.8516849	+	12.6268	NA	Intergenic	(CA)n|Simple_repeat|Simple_repeat	-18659	NM_021518	59021	Mm.397471	NM_021518	ENSMUSG00000047187	Rab2a	9330148M11Rik|C80220|Rab2	RAB2A, member RAS oncogene family	protein-coding
ALL_peak_91540	NO	YES	chr5	119201547	119202105	chr5.119201547	+	12.6268	NA	Intergenic	Intergenic	-1808	NR_046033	665194	Mm.491047	NR_046033	ENSMUSG00000107334	Gm7538	EG665194	predicted gene 7538	ncRNA
ALL_peak_53923	NO	YES	chr17	86167412	86167700	chr17.86167412	+	12.6268	NA	promoter-TSS (NM_011104)	promoter-TSS (NM_011104)	-229	NM_011104	18754	Mm.24614	NM_011104	ENSMUSG00000045038	Prkce	5830406C15Rik|PKC[e]|PKCepsilon|Pkce|R75156	protein kinase C, epsilon	protein-coding
ALL_peak_71580	NO	YES	chr3	28264268	28264620	chr3.28264268	+	12.6268	NA	intron (NM_001163007, intron 1 of 31)	(TG)n|Simple_repeat|Simple_repeat	1230	NM_001163009	665113	Mm.126193	NM_026910	ENSMUSG00000027692	Tnik	1500031A17Rik|4831440I19Rik|AI451411|C530008O15Rik|C630040K21Rik	TRAF2 and NCK interacting kinase	protein-coding
ALL_peak_2805	NO	YES	chr1	64088496	64088796	chr1.64088496	+	12.6268	NA	intron (NM_033563, intron 1 of 3)	(CA)n|Simple_repeat|Simple_repeat	32743	NM_033563	93691	Mm.29466	NM_033563		Klf7	9830124P08Rik	Kruppel-like factor 7 (ubiquitous)	protein-coding
ALL_peak_112854	NO	YES	chr8	94785434	94785724	chr8.94785434	+	12.5153	NA	Intergenic	(TG)n|Simple_repeat|Simple_repeat	13399	NM_009142	20312	Mm.103711	NM_009142	ENSMUSG00000031778	Cx3cl1	AB030188|ABCD-3|AI848747|CX3C|Cxc3|D8Bwg0439e|Scyd1	chemokine (C-X3-C motif) ligand 1	protein-coding
ALL_peak_49819	NO	YES	chr17	6173454	6173825	chr17.6173454	+	12.4943	NA	intron (NM_054040, intron 1 of 13)	intron (NM_054040, intron 1 of 13)	35491	NM_054040	68842	Mm.449307	NM_054040	ENSMUSG00000034377	Tulp4	1110057P05Rik|2210038L17Rik|Tusp	tubby like protein 4	protein-coding
ALL_peak_21046	NO	YES	chr11	98448115	98448446	chr11.98448115	+	12.4943	NA	intron (NM_010346, intron 1 of 14)	(TG)n|Simple_repeat|Simple_repeat	1446	NM_010346	14786	Mm.276702	NM_010346	ENSMUSG00000019312	Grb7	mKIAA4028	growth factor receptor bound protein 7	protein-coding
ALL_peak_12913	NO	YES	chr10	68354848	68355183	chr10.68354848	+	12.3955	NA	Intergenic	(TG)n|Simple_repeat|Simple_repeat	-33873	NR_045357	75148	Mm.23505	NR_045357		4930545H06Rik	-	RIKEN cDNA 4930545H06 gene	ncRNA
ALL_peak_111896	NO	YES	chr8	77433384	77433658	chr8.77433384	+	12.2945	NA	intron (NM_030113, intron 3 of 22)	intron (NM_030113, intron 3 of 22)	-83535	NR_028125	70345	Mm.411813	NR_028125	ENSMUSG00000097882	0610038B21Rik	-	RIKEN cDNA 0610038B21 gene	ncRNA
ALL_peak_101015	NO	YES	chr6	146751494	146751814	chr6.146751494	+	12.2945	NA	intron (NM_172734, intron 1 of 13)	(GA)n|Simple_repeat|Simple_repeat	26724	NM_172734	232533	Mm.322121	NM_172734	ENSMUSG00000001630	Stk38l	4930473A22Rik|B230328I19|Ndr2|Ndr54	serine/threonine kinase 38 like	protein-coding
ALL_peak_17057	NO	YES	chr11	19834816	19835092	chr11.19834816	+	12.2945	NA	Intergenic	(TG)n|Simple_repeat|Simple_repeat	-89488	NM_033523	114716	Mm.266627	NM_033523	ENSMUSG00000045671	Spred2	C79158	sprouty-related, EVH1 domain containing 2	protein-coding
ALL_peak_118618	NO	YES	chr9	78615206	78615506	chr9.78615206	+	12.2945	NA	promoter-TSS (NM_153098)	promoter-TSS (NM_153098)	-190	NM_153098	235505	Mm.32955	NM_153098	ENSMUSG00000046186	Cd109	9930012E15Rik|AI480638|GARP	CD109 antigen	protein-coding
ALL_peak_22772	NO	YES	chr12	8842616	8842902	chr12.8842616	+	12.2945	NA	Intergenic	(TC)n|Simple_repeat|Simple_repeat	71363	NM_011519	20969	Mm.2580	NM_011519	ENSMUSG00000020592	Sdc1	AA408134|AA409076|CD138|Sstn|Synd|Synd1|syn-1	syndecan 1	protein-coding
ALL_peak_64413	NO	YES	chr2	58486264	58486811	chr2.58486264	+	12.2945	NA	intron (NM_001110205, intron 3 of 10)	intron (NM_001110205, intron 3 of 10)	80291	NM_007394	11477	Mm.689	NM_007394	ENSMUSG00000026836	Acvr1	ALK2|ActR-I|ActRIA|Acvr|Acvrlk2|Alk-2|Alk8|D330013D15Rik|SKR1|Tsk7L	activin A receptor, type 1	protein-coding
ALL_peak_20509	NO	YES	chr11	89672274	89672579	chr11.89672274	+	12.2945	NA	Intergenic	Intergenic	-133871	NM_001080933	382543	Mm.173249	NM_001080933	ENSMUSG00000047773	Ankfn1	Gm1175	ankyrin-repeat and fibronectin type III domain containing 1	protein-coding
ALL_peak_111105	NO	YES	chr8	61731924	61732225	chr8.61731924	+	12.2945	NA	intron (NM_001081390, intron 2 of 19)	(CA)n|Simple_repeat|Simple_repeat	28024	NM_001293773	72333	Mm.29933	NM_001081390	ENSMUSG00000058056	Palld	2410003B16Rik|6030492A02	palladin, cytoskeletal associated protein	protein-coding
ALL_peak_63996	NO	YES	chr2	49688234	49688542	chr2.49688234	+	12.2945	NA	intron (NM_008449, intron 3 of 25)	(TG)n|Simple_repeat|Simple_repeat	69074	NM_008449	16574	Mm.256342	NM_008449	ENSMUSG00000026764	Kif5c	KINN|Khc|NKHC|NKHC2	kinesin family member 5C	protein-coding
ALL_peak_101873	NO	YES	chr7	19876453	19876719	chr7.19876453	+	12.2286	NA	3' UTR (NM_177036, exon 7 of 7)	3' UTR (NM_177036, exon 7 of 7)	11379	NM_177036	319930	Mm.215839	NM_177036	ENSMUSG00000049848	Ceacam19	C130022P09Rik|CEAL1	carcinoembryonic antigen-related cell adhesion molecule 19	protein-coding
ALL_peak_12387	NO	YES	chr10	59511176	59511486	chr10.59511176	+	12.1655	NA	intron (NM_001033259, intron 1 of 7)	(CA)n|Simple_repeat|Simple_repeat	-69552	NM_010959	18302	Mm.123013	NM_010959	ENSMUSG00000009654	Oit3	EF-9|LZP	oncoprotein induced transcript 3	protein-coding
ALL_peak_120466	NO	YES	chr9	114741828	114742277	chr9.114741828	+	12.1655	NA	intron (NM_026036, intron 3 of 3)	intron (NM_026036, intron 3 of 3)	10849	NM_026036	67213	Mm.28858	NM_026036	ENSMUSG00000032434	Cmtm6	2810051A14Rik|AA536733|Cklfsf6	CKLF-like MARVEL transmembrane domain containing 6	protein-coding
ALL_peak_51512	NO	YES	chr17	42875925	42876201	chr17.42875925	+	12.1655	NA	intron (NM_009847, intron 1 of 17)	intron (NM_009847, intron 1 of 17)	361	NM_009847	12488	Mm.218637	NM_009847	ENSMUSG00000061665	Cd2ap	AL024079|C78928|METS-1|Mets1	CD2-associated protein	protein-coding
ALL_peak_58724	NO	YES	chr19	4397188	4397737	chr19.4397188	+	12.1573	NA	promoter-TSS (NM_001001984)	promoter-TSS (NM_001001984)	-385	NM_001001984	225876	Mm.31941	NM_001001984	ENSMUSG00000054611	Kdm2a	100043628|5530401A10Rik|AA589516|AW536790|Cxxc8|Fbl11|Fbl7|Fbxl11|Gm4560|Jhdm1|Jhdm1a|lalina	lysine (K)-specific demethylase 2A	protein-coding
ALL_peak_92516	NO	YES	chr5	134959511	134959995	chr5.134959511	+	12.1233	NA	Intergenic	(TG)n|Simple_repeat|Simple_repeat	-12819	NM_009903	12740	Mm.7339	NM_009903	ENSMUSG00000047501	Cldn4	Cep-r|Cpetr|Cpetr1	claudin 4	protein-coding
ALL_peak_43661	NO	YES	chr15	81189830	81190143	chr15.81189830	+	12.0565	NA	promoter-TSS (NR_015603)	promoter-TSS (NR_015603)	771	NM_001082536	223701	Mm.439814	NM_153049	ENSMUSG00000042292	Mkl1	AMKL|Bsac|Mal|Mrtf-A	MKL (megakaryoblastic leukemia)/myocardin-like 1	protein-coding
ALL_peak_109258	NO	YES	chr8	27262643	27263052	chr8.27262643	+	12.0145	NA	intron (NM_007918, intron 1 of 2)	(CA)n|Simple_repeat|Simple_repeat	2520	NM_007918	13685	Mm.6700	NM_007918	ENSMUSG00000031490	Eif4ebp1	4e-bp1|AA959816|PHAS-I	eukaryotic translation initiation factor 4E binding protein 1	protein-coding
ALL_peak_85540	NO	YES	chr4	150730586	150730902	chr4.150730586	+	11.9622	NA	Intergenic	(TG)n|Simple_repeat|Simple_repeat	-78570	NM_173774	242773	Mm.29280	NM_173774		Slc45a1	C230078B22|Dnb5	solute carrier family 45, member 1	protein-coding
ALL_peak_102807	NO	YES	chr7	38018548	38018805	chr7.38018548	+	11.9622	NA	intron (NM_011274, intron 1 of 10)	(TG)n|Simple_repeat|Simple_repeat	876	NM_011274	19777	Mm.387220	NM_011274	ENSMUSG00000030421	Uri1	C80913|NNX3|Rmp	URI1, prefoldin-like chaperone	protein-coding
ALL_peak_15068	NO	YES	chr10	108435751	108436289	chr10.108435751	+	11.9622	NA	Intergenic	(TG)n|Simple_repeat|Simple_repeat	103831	NM_054056	114774	Mm.391419	NM_054056	ENSMUSG00000035873	Pawr	2310001G03Rik|PAR4|Par-4	PRKC, apoptosis, WT1, regulator	protein-coding
ALL_peak_19428	NO	YES	chr11	69443246	69443538	chr11.69443246	+	11.9622	NA	intron (NM_001081330, intron 63 of 85)	(CA)n|Simple_repeat|Simple_repeat	-29717	NM_001017426	216850	Mm.261201	NM_001017426	ENSMUSG00000018476	Kdm6b	1700064E03Rik|BC038313|Jmjd3|mKIAA0346	KDM1 lysine (K)-specific demethylase 6B	protein-coding
ALL_peak_82611	NO	YES	chr4	96555934	96556209	chr4.96555934	+	11.9622	NA	Intergenic	(TG)n|Simple_repeat|Simple_repeat	-2420	NM_010008	13110	Mm.98200	NM_010008	ENSMUSG00000052914	Cyp2j6	-	cytochrome P450, family 2, subfamily j, polypeptide 6	protein-coding
ALL_peak_21139	NO	YES	chr11	99631065	99631362	chr11.99631065	+	11.9622	NA	Intergenic	(TG)n|Simple_repeat|Simple_repeat	-2974	NM_001048196	665891	Mm.394141	NM_001048196	ENSMUSG00000063251	Krtap4-1	A030010K20Rik	keratin associated protein 4-1	protein-coding
ALL_peak_41041	NO	YES	chr15	25638167	25638477	chr15.25638167	+	11.9622	NA	intron (NM_019472, intron 1 of 40)	B3A|SINE|B2	15772	NM_019472	17909	Mm.60590	NM_019472	ENSMUSG00000022272	Myo10	AW048724|D15Ertd600e|mKIAA0799	myosin X	protein-coding
ALL_peak_6086	NO	YES	chr1	125701616	125701929	chr1.125701616	+	11.9622	NA	intron (NM_027677, intron 1 of 1)	(CA)n|Simple_repeat|Simple_repeat	24776	NM_027677	71111	Mm.32727	NM_027677	ENSMUSG00000026343	Gpr39	4933415E13Rik	G protein-coupled receptor 39	protein-coding
ALL_peak_7898	NO	YES	chr1	160905812	160906117	chr1.160905812	+	11.9506	NA	promoter-TSS (NM_001024952)	promoter-TSS (NM_001024952)	-447	NM_001024952	381305	Mm.329667	NM_001024952	ENSMUSG00000040423	Rc3h1	5730557L09Rik|Gm551|N28103|mKIAA2025	RING CCCH (C3H) domains 1	protein-coding
ALL_peak_102327	NO	YES	chr7	28382191	28382557	chr7.28382191	+	11.8931	NA	Intergenic	(TG)n|Simple_repeat|Simple_repeat	-3146	NM_011756	22695	Mm.389856	NM_011756	ENSMUSG00000044786	Zfp36	Gos24|Nup475|TIS11D|TISII|Tis11|Ttp|Zfp-36	zinc finger protein 36	protein-coding
ALL_peak_92732	NO	YES	chr5	137671232	137671547	chr5.137671232	+	11.8735	NA	intron (NM_001303271, intron 1 of 12)	(CA)n|Simple_repeat|Simple_repeat	13364	NM_001303271	231801	Mm.260869	NM_145566	ENSMUSG00000029722	Agfg2	A630095P14Rik|Hrbl|RAB-R|RABR	ArfGAP with FG repeats 2	protein-coding
ALL_peak_37070	NO	YES	chr14	66280084	66280424	chr14.66280084	+	11.8367	NA	intron (NM_172498, intron 1 of 29)	(CA)n|Simple_repeat|Simple_repeat	798	NM_172498	19229	Mm.21613	NM_172498	ENSMUSG00000059456	Ptk2b	CADTK|CAKB|CAKbeta|E430023O05Rik|FADK2|FAK2|PYK2|Raftk	PTK2 protein tyrosine kinase 2 beta	protein-coding
ALL_peak_108029	NO	YES	chr7	145222079	145222426	chr7.145222079	+	11.8367	NA	intron (NR_132644, intron 24 of 24)	intron (NR_132644, intron 24 of 24)	-14133	NR_033626	100040049	Mm.102235	NR_033626		1810010D01Rik	Gm2572	RIKEN cDNA 1810010D01 gene	ncRNA
ALL_peak_26531	NO	YES	chr12	84194264	84194520	chr12.84194264	+	11.8367	NA	promoter-TSS (NM_001163502)	promoter-TSS (NM_001163502)	-377	NM_001163502	238317	Mm.31256	NM_001163501	ENSMUSG00000042507	Elmsan1	9430029N19Rik|C130039O16Rik|Gm260	ELM2 and Myb/SANT-like domain containing 1	protein-coding
ALL_peak_112094	NO	YES	chr8	80852570	80852954	chr8.80852570	+	11.7757	NA	intron (NM_001301298, intron 1 of 10)	(TG)n|Simple_repeat|Simple_repeat	27717	NM_021356	14388	Mm.277409	NM_021356	ENSMUSG00000031714	Gab1	AA408973|AW107238	growth factor receptor bound protein 2-associated protein 1	protein-coding
ALL_peak_110402	NO	YES	chr8	47673702	47674022	chr8.47673702	+	11.7757	NA	intron (NM_023503, intron 1 of 1)	CpG	1297	NM_023503	69260	Mm.430733	NM_023503	ENSMUSG00000063049	Ing2	2810011M06Rik|Ing1l|Ing2b|P33ING2	inhibitor of growth family, member 2	protein-coding
ALL_peak_91916	NO	YES	chr5	125164760	125165062	chr5.125164760	+	11.6727	NA	intron (NM_001253904, intron 1 of 47)	intron (NM_001253904, intron 1 of 47)	14303	NM_011424	20602	Mm.278646	NM_011424	ENSMUSG00000029478	Ncor2	N-CoR|SMRT|SMRTe	nuclear receptor co-repressor 2	protein-coding
ALL_peak_112014	NO	YES	chr8	79495877	79496447	chr8.79495877	+	11.6299	NA	Intergenic	(CA)n|Simple_repeat|Simple_repeat	-96694	NM_008539	17125	Mm.223717	NM_008539	ENSMUSG00000031681	Smad1	AI528653|Madh1|Madr1|Mlp1|MusMLP	SMAD family member 1	protein-coding
ALL_peak_121627	NO	YES	chrX	48454070	48454374	chrX.48454070	+	11.6299	NA	intron (NM_019680, intron 1 of 8)	CpG	8910	NM_019680	56501	Mm.36808	NM_019680	ENSMUSG00000031103	Elf4	AV314029|BC042423|ENSMUSG00000053512|Gm9907|Mef	E74-like factor 4 (ets domain transcription factor)	protein-coding
ALL_peak_75562	NO	YES	chr3	108892128	108892464	chr3.108892128	+	11.6299	NA	Intergenic	(TG)n|Simple_repeat|Simple_repeat	-2288	NM_001165965	320181	Mm.244233	NM_177091	ENSMUSG00000045326	Fndc7	E230011A21Rik	fibronectin type III domain containing 7	protein-coding
ALL_peak_96721	NO	YES	chr6	67087383	67087667	chr6.67087383	+	11.6299	NA	Intergenic	(CA)n|Simple_repeat|Simple_repeat	-50118	NM_007836	13197	Mm.72235	NM_007836	ENSMUSG00000036390	Gadd45a	AA545191|Ddit1|GADD45	growth arrest and DNA-damage-inducible 45 alpha	protein-coding
ALL_peak_15701	NO	YES	chr10	120417595	120417889	chr10.120417595	+	11.6299	NA	intron (NM_010441, intron 3 of 4)	intron (NM_010441, intron 3 of 4)	28219	NR_040626	320626	Mm.446091	NR_040626	ENSMUSG00000090191	9230105E05Rik	-	RIKEN cDNA 9230105E05 gene	ncRNA
ALL_peak_17103	NO	YES	chr11	20632335	20632620	chr11.20632335	+	11.6299	NA	intron (NM_001038625, intron 1 of 1)	CpG	500	NM_001038625	58172	Mm.339676	NM_021372	ENSMUSG00000049800	Sertad2	AB041541|AU021878|Kiaa0127|MNCb-1504|SEI-2|Sei2|TRIP-Br2|mKIAA0127	SERTA domain containing 2	protein-coding
ALL_peak_102086	NO	YES	chr7	24081806	24082209	chr7.24081806	+	11.6288	NA	5' UTR (NM_172483, exon 1 of 3)	5' UTR (NM_172483, exon 1 of 3)	110	NM_172483	210135	Mm.32254	NM_172483	ENSMUSG00000057101	Zfp180	2310040I01Rik|AI852378|D130011P11|HHZ168	zinc finger protein 180	protein-coding
ALL_peak_84654	NO	YES	chr4	136113300	136114648	chr4.136113300	+	11.6229	NA	Intergenic	(CA)n|Simple_repeat|Simple_repeat	-29848	NM_008321	15903	Mm.110	NM_008321		Id3	Hlh462|Idb3|bHLHb25	inhibitor of DNA binding 3	protein-coding
ALL_peak_84710	NO	YES	chr4	136802082	136802520	chr4.136802082	+	11.607	NA	intron (NM_001290753, intron 1 of 15)	(TG)n|Simple_repeat|Simple_repeat	33711	NM_010142	13844	Mm.250981	NM_010142	ENSMUSG00000028664	Ephb2	Cek5|Drt|ETECK|Erk|Hek5|Nuk|Prkm5|Qek5|Sek3|Tyro5	Eph receptor B2	protein-coding
ALL_peak_5726	NO	YES	chr1	121360386	121360681	chr1.121360386	+	11.5079	NA	Intergenic	(CA)n|Simple_repeat|Simple_repeat	-27944	NM_178082	72999	Mm.27136	NM_133748	ENSMUSG00000003721	Insig2	2900053I11Rik|C730043J18Rik|Insig-2	insulin induced gene 2	protein-coding
ALL_peak_47437	NO	YES	chr16	55851976	55852680	chr16.55851976	+	11.4294	NA	intron (NM_001134457, intron 4 of 5)	(TG)n|Simple_repeat|Simple_repeat	-13687	NM_001159395	80859	Mm.247272	NM_030612	ENSMUSG00000035356	Nfkbiz	AA408868|INAP|Mail	nuclear factor of kappa light polypeptide gene enhancer in B cells inhibitor, zeta	protein-coding
ALL_peak_108052	NO	YES	chr8	3220850	3221172	chr8.3220850	+	11.3388	NA	intron (NM_010568, intron 2 of 20)	intron (NM_010568, intron 2 of 20)	58606	NM_010568	16337	Mm.268003	NM_010568	ENSMUSG00000005534	Insr	4932439J01Rik|CD220|D630014A15Rik|IR|IR-A|IR-B	insulin receptor	protein-coding
ALL_peak_52359	NO	YES	chr17	57275522	57275811	chr17.57275522	+	11.3088	NA	Intergenic	CpG	-3434	NM_011691	22324	Mm.248172	NM_011691		Vav1	Vav|vav-T	vav 1 oncogene	protein-coding
ALL_peak_67163	NO	YES	chr2	117802881	117803202	chr2.117802881	+	11.2977	NA	Intergenic	(CA)n|Simple_repeat|Simple_repeat	9761	NR_126427	100504728	Mm.413174	NR_126427		Gm13985	OTTMUSG00000015235	predicted gene 13985	ncRNA
ALL_peak_21638	NO	YES	chr11	108459834	108460170	chr11.108459834	+	11.2977	NA	intron (NM_029606, intron 5 of 27)	(TG)n|Simple_repeat|Simple_repeat	34736	NM_029606	76380	Mm.344071	NM_029586	ENSMUSG00000020728	Cep112	1700001M19Rik|1700029K01Rik|8430407H02Rik|AV043680|AV207351|Ccdc46|Macoco	centrosomal protein 112	protein-coding
ALL_peak_42707	NO	YES	chr15	61447145	61447421	chr15.61447145	+	11.2977	NA	Intergenic	(TG)n|Simple_repeat|Simple_repeat	327168	NR_040350	432956	Mm.404918	NR_040350		D030024E09Rik	-	RIKEN cDNA D030024E09 gene	ncRNA
ALL_peak_2367	NO	YES	chr1	54584645	54584907	chr1.54584645	+	11.2977	NA	Intergenic	(CA)n|Simple_repeat|Simple_repeat	-27092	NM_001163314	241062	Mm.103539	NM_175508	ENSMUSG00000073678	Pgap1	5033403E17Rik|9030223K07Rik|A530084K22|D230012E17Rik|oto	post-GPI attachment to proteins 1	protein-coding
ALL_peak_74791	NO	YES	chr3	93517602	93517902	chr3.93517602	+	11.2977	NA	Intergenic	(CA)n|Simple_repeat|Simple_repeat	-2744	NM_016740	20195	Mm.280038	NM_016740	ENSMUSG00000027907	S100a11	EMAPI|Emap1|S100a14|S100c|cal	S100 calcium binding protein A11	protein-coding
ALL_peak_30249	NO	YES	chr13	42238888	42239162	chr13.42238888	+	11.2977	NA	Intergenic	(CACG)n|Simple_repeat|Simple_repeat	-62245	NM_010104	13614	Mm.14543	NM_010104	ENSMUSG00000021367	Edn1	ET-1|preproET	endothelin 1	protein-coding
ALL_peak_12903	NO	YES	chr10	68247424	68247796	chr10.68247424	+	11.2977	NA	intron (NM_023598, intron 2 of 9)	(CA)n|Simple_repeat|Simple_repeat	31116	NM_023598	71371	Mm.440357	NM_023598	ENSMUSG00000019947	Arid5b	4930580B11|5430435G07Rik|AI467247|Desrt|Mrf2|Mrf2alpha|Mrf2beta	AT rich interactive domain 5B (MRF1-like)	protein-coding
ALL_peak_68675	NO	YES	chr2	147743722	147744203	chr2.147743722	+	11.2977	NA	Intergenic	(TG)n|Simple_repeat|Simple_repeat	33269	NR_046014	381384	Mm.259809	NR_046014	ENSMUSG00000051986	A530006G24Rik	Gm1003	RIKEN cDNA A530006G24 gene	ncRNA
ALL_peak_7455	NO	YES	chr1	152090449	152090783	chr1.152090449	+	11.2977	NA	promoter-TSS (NM_197990)	promoter-TSS (NM_197990)	-296	NM_197990	69399	Mm.278031	NM_197990	ENSMUSG00000032666	1700025G04Rik	2610510E02Rik|2900042O04Rik|ENSMUSG00000073540	RIKEN cDNA 1700025G04 gene	protein-coding
ALL_peak_69971	NO	YES	chr2	170344726	170344970	chr2.170344726	+	11.2977	NA	Intergenic	(TG)n|Simple_repeat|Simple_repeat	-11513	NR_040610	73303	Mm.443297	NR_040610	ENSMUSG00000086999	Bcas1os2	1700040N02Rik	breast carcinoma amplified sequence 1, opposite strand 2	ncRNA
ALL_peak_44017	NO	YES	chr15	88836986	88837349	chr15.88836986	+	11.2977	NA	Intergenic	Intergenic	17521	NM_029720	76737	Mm.292567	NM_029720	ENSMUSG00000023272	Creld2	5730592L21Rik|C85758	cysteine-rich with EGF-like domains 2	protein-coding
ALL_peak_43438	NO	YES	chr15	76456920	76457198	chr15.76456920	+	11.1791	NA	promoter-TSS (NM_198885)	promoter-TSS (NM_198885)	-379	NM_198885	20289	Mm.322821	NM_198885	ENSMUSG00000034161	Scx	BB114693|Bhlha41|Scl	scleraxis	protein-coding
ALL_peak_114458	NO	YES	chr8	123041052	123041305	chr8.123041052	+	11.156	NA	intron (NR_037865, intron 1 of 13)	(CA)n|Simple_repeat|Simple_repeat	1106	NM_001081379	77087	Mm.31567	NM_001081379	ENSMUSG00000035569	Ankrd11	2410104C19Rik|3010027A04Rik|6330578C09Rik|9530048I21Rik|AA930108|Gm176|Yod	ankyrin repeat domain 11	protein-coding
ALL_peak_115113	NO	YES	chr9	9207021	9207277	chr9.9207021	+	11.156	NA	intron (NM_027823, intron 1 of 22)	(TG)n|Simple_repeat|Simple_repeat	-29139	NR_045754	100579151	Mm.412450	NR_045754	ENSMUSG00000085253	Gm16833	-	predicted gene, 16833	ncRNA
ALL_peak_57998	NO	YES	chr18	77879593	77879868	chr18.77879593	+	11.156	NA	intron (NM_013831, intron 14 of 14)	(CA)n|Simple_repeat|Simple_repeat	-58737	NM_001195633	100502841	Mm.297782	NM_001195633	ENSMUSG00000039840	Epg5	4732475F16|5430411K18Rik|AI661957|AW456499|mKIAA1632	ectopic P-granules autophagy protein 5 homolog (C. elegans)	protein-coding
ALL_peak_85823	NO	YES	chr4	156031780	156032082	chr4.156031780	+	11.1354	NA	Intergenic	(CACG)n|Simple_repeat|Simple_repeat	5589	NM_009400	21936	Mm.3180	NM_009400	ENSMUSG00000041954	Tnfrsf18	AITR|Gitr	tumor necrosis factor receptor superfamily, member 18	protein-coding
ALL_peak_96902	NO	YES	chr6	71492561	71492982	chr6.71492561	+	11.1354	NA	Intergenic	IMPB_01|Satellite|Satellite	-1106	NM_009543	22644	Mm.422969	NM_009543	ENSMUSG00000052656	Rnf103	AW146237|AW212918|Zfp103|kf-1	ring finger protein 103	protein-coding
ALL_peak_84658	NO	YES	chr4	136148063	136148487	chr4.136148063	+	11.1169	NA	Intergenic	(CA)n|Simple_repeat|Simple_repeat	4453	NM_008321	15903	Mm.110	NM_008321		Id3	Hlh462|Idb3|bHLHb25	inhibitor of DNA binding 3	protein-coding
ALL_peak_21345	NO	YES	chr11	103141240	103141708	chr11.103141240	+	11.1002	NA	Intergenic	Intergenic	8115	NM_027658	71059	Mm.273871	NM_027658	ENSMUSG00000043372	Hexim2	4933402L21Rik	hexamethylene bis-acetamide inducible 2	protein-coding
ALL_peak_11501	NO	YES	chr10	40339174	40339682	chr10.40339174	+	11.0297	NA	Intergenic	Charlie13a|DNA|hAT-Charlie	-9880	NM_001168304	78334	Mm.200924	NM_198164	ENSMUSG00000038481	Cdk19	2700084L06Rik|AI845279|AW228747|CDK11|Cdc2l6|mKIAA1028	cyclin-dependent kinase 19	protein-coding
ALL_peak_31742	NO	YES	chr13	74259915	74260186	chr13.74259915	+	10.9654	NA	intron (NM_009644, intron 3 of 10)	CpG	32259	NM_009644	11624	Mm.290446	NM_009644	ENSMUSG00000021575	Ahrr	mKIAA1234	aryl-hydrocarbon receptor repressor	protein-coding
ALL_peak_69758	NO	YES	chr2	167816601	167817322	chr2.167816601	+	10.9654	NA	Intergenic	Intergenic	-115366	NM_011201	19246	Mm.277916	NM_011201	ENSMUSG00000027540	Ptpn1	PTP-1B|PTP-HA2|PTP1B	protein tyrosine phosphatase, non-receptor type 1	protein-coding
ALL_peak_96439	NO	YES	chr6	61206519	61206785	chr6.61206519	+	10.9654	NA	intron (NM_183310, intron 1 of 10)	(CA)n|Simple_repeat|Simple_repeat	-25842	NR_040287	100504262	Mm.438066	NR_040287		A730020E08Rik	-	RIKEN cDNA A730020E08 gene	ncRNA
ALL_peak_82160	NO	YES	chr4	87409954	87410224	chr4.87409954	+	10.9654	NA	Intergenic	RLTR20C1_MM|LTR|ERVK	-179549	NM_172426	76376	Mm.490487	NM_172426	ENSMUSG00000037996	Slc24a2	2810021B17Rik|6330417K15Rik|AI847460|Nckx2	solute carrier family 24 (sodium/potassium/calcium exchanger), member 2	protein-coding
ALL_peak_113610	NO	YES	chr8	108691931	108692441	chr8.108691931	+	10.9654	NA	Intergenic	Intergenic	-22458	NM_007496	11906	Mm.416972	NM_007496	ENSMUSG00000038872	Zfhx3	A230102L03Rik|Atbf1|Sci|WBP9|mKIAA4228	zinc finger homeobox 3	protein-coding
ALL_peak_83906	NO	YES	chr4	123788239	123788483	chr4.123788239	+	10.9654	NA	intron (NM_183163, intron 1 of 7)	(TG)n|Simple_repeat|Simple_repeat	486	NM_183163	230726	Mm.37334	NM_183163	ENSMUSG00000043333	Rhbdl2	9130416B15|RRP2	rhomboid, veinlet-like 2 (Drosophila)	protein-coding
ALL_peak_15512	NO	YES	chr10	117129991	117130250	chr10.117129991	+	10.9654	NA	intron (NM_177798, intron 1 of 9)	(TG)n|Simple_repeat|Simple_repeat	18354	NM_177798	327826	Mm.135965	NM_177798	ENSMUSG00000020170	Frs2	4732458E18|C330018A15Rik|Frs2alpha|SNT1	fibroblast growth factor receptor substrate 2	protein-coding
ALL_peak_108399	NO	YES	chr8	10589533	10589778	chr8.10589533	+	10.9654	NA	intron (NM_001081397, intron 33 of 35)	intron (NM_001081397, intron 33 of 35)	292799	NR_040705	320014	Mm.403203	NR_040705		B930025P03Rik	-	RIKEN cDNA B930025P03 gene	ncRNA
ALL_peak_63537	NO	YES	chr2	38927302	38927613	chr2.38927302	+	10.9654	NA	promoter-TSS (NM_010264)	promoter-TSS (NM_010264)	-996	NM_010264	14536	Mm.439703	NM_010264	ENSMUSG00000063972	Nr6a1	1700113M01Rik|Gcnf|NCNF|RTR	nuclear receptor subfamily 6, group A, member 1	protein-coding
ALL_peak_96052	NO	YES	chr6	52261565	52261793	chr6.52261565	+	10.9654	NA	promoter-TSS (NM_008264)	promoter-TSS (NM_008264)	-799	NM_008264	15398	Mm.377086	NM_008264		Hoxa13	Hd|Hox-1.10	homeobox A13	protein-coding
ALL_peak_107218	NO	YES	chr7	127925153	127925458	chr7.127925153	+	10.9654	NA	TTS (NM_133351)	TTS (NM_133351)	4808	NM_133351	76560	Mm.5875	NM_133351	ENSMUSG00000030800	Prss8	2410039E18Rik|AI313909|C79772|CAP1|fr|mCAP1	protease, serine 8 (prostasin)	protein-coding
ALL_peak_122669	NO	YES	chrX	142688762	142689054	chrX.142688762	+	10.9654	NA	intron (NM_001199360, intron 2 of 6)	(CA)n|Simple_repeat|Simple_repeat	7182	NM_001199360	209497	Mm.249648	NM_177592	ENSMUSG00000047045	Tmem164	AI316850|AI852450|AW547186|F730011B02	transmembrane protein 164	protein-coding
ALL_peak_109041	NO	YES	chr8	23256175	23256493	chr8.23256175	+	10.9654	NA	intron (NM_020585, intron 1 of 4)	intron (NM_020585, intron 1 of 4)	746	NM_001042484	57437	Mm.196269	NM_020585	ENSMUSG00000015341	Golga7	AB041568|C130038N16Rik|GCP16|GOLGA3AP1|HSPC041|R75586	golgi autoantigen, golgin subfamily a, 7	protein-coding
ALL_peak_51630	NO	YES	chr17	44261744	44262192	chr17.44261744	+	10.9654	NA	intron (NM_172621, intron 4 of 5)	intron (NM_172621, intron 4 of 5)	73396	NM_172621	224796	Mm.37666	NM_172621	ENSMUSG00000023959	Clic5	5730531E12Rik|B330005L24|Gm322|jbg	chloride intracellular channel 5	protein-coding
ALL_peak_61889	NO	YES	chr2	5567121	5567711	chr2.5567121	+	10.9654	NA	intron (NM_177343, intron 1 of 10)	(TG)n|Simple_repeat|Simple_repeat	108630	NM_001290376	227541	Mm.191949	NM_177343	ENSMUSG00000039145	Camk1d	A630059D12Rik|CKLiK|CaMKIdelta|E030025C11Rik|mCKLiK	calcium/calmodulin-dependent protein kinase ID	protein-coding
ALL_peak_64358	NO	YES	chr2	57116171	57116475	chr2.57116171	+	10.9438	NA	intron (NM_001139509, intron 1 of 7)	(TG)n|Simple_repeat|Simple_repeat	-1285	NM_013613	18227	Mm.3507	NM_013613	ENSMUSG00000026826	Nr4a2	HZF-3|NOT|Nurr1|RNR-1|TINOR|TINUR	nuclear receptor subfamily 4, group A, member 2	protein-coding
ALL_peak_14776	NO	YES	chr10	102511234	102511612	chr10.102511234	+	10.8503	NA	promoter-TSS (NM_146240)	promoter-TSS (NM_146240)	-799	NM_146240	237504	Mm.282672	NM_146240	ENSMUSG00000044921	Rassf9	AW322107|Pamci	Ras association (RalGDS/AF-6) domain family (N-terminal) member 9	protein-coding
ALL_peak_56547	NO	YES	chr18	49986477	49986871	chr18.49986477	+	10.8503	NA	intron (NM_001177759, intron 1 of 1)	(CA)n|Simple_repeat|Simple_repeat	7247	NM_001177760	106869	Mm.27740	NM_134131	ENSMUSG00000062210	Tnfaip8	AA987150|E130304C20Rik|ENSMUSG00000073567|Gg2-1|Gm10539|Nded|Ssc-2	tumor necrosis factor, alpha-induced protein 8	protein-coding
ALL_peak_114715	NO	YES	chr8	126536956	126537244	chr8.126536956	+	10.8461	NA	Intergenic	(TC)n|Simple_repeat|Simple_repeat	56336	NM_001164598	270110	Mm.334918	NM_001164598	ENSMUSG00000051495	Irf2bp2	E130305N23Rik|IRF-2BP2	interferon regulatory factor 2 binding protein 2	protein-coding
ALL_peak_19486	NO	YES	chr11	70258989	70259367	chr11.70258989	+	10.8461	NA	Intergenic	PB1D9|SINE|Alu	-3837	NM_007440	11684	Mm.12286	NM_007440	ENSMUSG00000000320	Alox12	9930022G08Rik|Alox12p|P-12LO	arachidonate 12-lipoxygenase	protein-coding
ALL_peak_38693	NO	YES	chr14	100284281	100284531	chr14.100284281	+	10.8461	NA	Intergenic	(CA)n|Simple_repeat|Simple_repeat	-134610	NM_010636	16597	Mm.396499	NM_010636		Klf12	2700063E05Rik|AI225908|AI315654|AP-2rep|B130052C06Rik|D530033K05Rik	Kruppel-like factor 12	protein-coding
ALL_peak_49181	NO	YES	chr16	91073449	91073720	chr16.91073449	+	10.8461	NA	Intergenic	(GA)n|Simple_repeat|Simple_repeat	-4439	NM_001163695	74387	Mm.236220	NM_028905	ENSMUSG00000039851	4932438H23Rik	4931406G06Rik|AI550392	RIKEN cDNA 4932438H23 gene	protein-coding
ALL_peak_53550	NO	YES	chr17	79715798	79716108	chr17.79715798	+	10.8461	NA	promoter-TSS (NM_009994)	promoter-TSS (NM_009994)	-912	NM_009994	13078	Mm.214016	NM_009994	ENSMUSG00000024087	Cyp1b1	CP1B|P4501b1	cytochrome P450, family 1, subfamily b, polypeptide 1	protein-coding
ALL_peak_74881	NO	YES	chr3	95517666	95518070	chr3.95517666	+	10.8423	NA	Intergenic	(CA)n|Simple_repeat|Simple_repeat	-8918	NM_001267695	13040	Mm.3619	NM_021281	ENSMUSG00000038642	Ctss	Cats	cathepsin S	protein-coding
ALL_peak_25784	NO	YES	chr12	69986114	69986523	chr12.69986114	+	10.8423	NA	intron (NM_022028, intron 1 of 4)	(TG)n|Simple_repeat|Simple_repeat	684	NM_022028	64010	Mm.390480	NM_022028	ENSMUSG00000021067	Sav1	1700040G09Rik|Salv|Sav|WW45|Wwp3|Wwp4	salvador homolog 1 (Drosophila)	protein-coding
ALL_peak_1578	NO	YES	chr1	37523738	37524210	chr1.37523738	+	10.8423	NA	intron (NM_001290801, intron 1 of 14)	RMER6A|LTR|ERVK	12430	NM_001290801	269181	Mm.25861	NM_173870	ENSMUSG00000026110	Mgat4a	9530018I07Rik|GnT-IVa|glcNAc-T-IVa	mannoside acetylglucosaminyltransferase 4, isoenzyme A	protein-coding
ALL_peak_11562	NO	YES	chr10	41552868	41553102	chr10.41552868	+	10.7421	NA	intron (NM_001303469, intron 15 of 20)	(TG)n|Simple_repeat|Simple_repeat	-15031	NR_045341	70538	Mm.399807	NR_045341	ENSMUSG00000091370	5730435O14Rik	-	RIKEN cDNA 5730435O14 gene	ncRNA
ALL_peak_86473	NO	YES	chr5	17556301	17556619	chr5.17556301	+	10.6331	NA	Intergenic	(TG)n|Simple_repeat|Simple_repeat	-18356	NM_013657	20348	Mm.5071	NM_013657	ENSMUSG00000028780	Sema3c	1110036B02Rik|SemE|Semae	sema domain, immunoglobulin domain (Ig), short basic domain, secreted, (semaphorin) 3C	protein-coding
ALL_peak_58717	NO	YES	chr19	4232018	4232425	chr19.4232018	+	10.6331	NA	promoter-TSS (NR_132280)	promoter-TSS (NR_132280)	-194	NR_132280	69745	Mm.32518	NM_027196	ENSMUSG00000024854	Pold4	2410012M21Rik|AI463381|AW060307|Polds|p12	polymerase (DNA-directed), delta 4	protein-coding
ALL_peak_90066	NO	YES	chr5	91097918	91098343	chr5.91097918	+	10.6331	NA	Intergenic	Intergenic	23513	NM_007950	13874	Mm.4791	NM_007950	ENSMUSG00000029377	Ereg	EPR	epiregulin	protein-coding
ALL_peak_90174	NO	YES	chr5	93037979	93038737	chr5.93037979	+	10.6331	NA	Intergenic	Intergenic	6664	NM_175270	78088	Mm.245085	NM_175270	ENSMUSG00000045314	Sowahb	5730467H21Rik|Ankrd56	sosondowah ankyrin repeat domain family member B	protein-coding
ALL_peak_104838	NO	YES	chr7	80026688	80027062	chr7.80026688	+	10.6331	NA	intron (NM_175433, intron 1 of 4)	(GA)n|Simple_repeat|Simple_repeat	647	NM_175433	209225	Mm.290925	NM_175433	ENSMUSG00000048897	Zfp710	5430400N05Rik|9830165K13|AI324798|Znf710	zinc finger protein 710	protein-coding
ALL_peak_90042	NO	YES	chr5	90760177	90760540	chr5.90760177	+	10.6331	NA	intron (NM_009141, intron 3 of 3)	(TC)n|Simple_repeat|Simple_repeat	1060	NM_009141	20311	Mm.4660	NM_009141	ENSMUSG00000029371	Cxcl5	AMCF-II|ENA-78|GCP-2|LIX|Scyb5|Scyb6	chemokine (C-X-C motif) ligand 5	protein-coding
ALL_peak_62144	NO	YES	chr2	9803645	9803956	chr2.9803645	+	10.6331	NA	Intergenic	(TG)n|Simple_repeat|Simple_repeat	74800	NM_008091	14462	Mm.313866	NM_008091	ENSMUSG00000015619	Gata3	Gata-3|jal	GATA binding protein 3	protein-coding
ALL_peak_122668	NO	YES	chrX	142681114	142681439	chrX.142681114	+	10.6331	NA	promoter-TSS (NM_177592)	promoter-TSS (NM_177592)	-124	NM_001199357	209497	Mm.249648	NM_177592	ENSMUSG00000047045	Tmem164	AI316850|AI852450|AW547186|F730011B02	transmembrane protein 164	protein-coding
ALL_peak_37493	NO	YES	chr14	74847082	74847422	chr14.74847082	+	10.6331	NA	intron (NM_001252132, intron 2 of 18)	(TG)n|Simple_repeat|Simple_repeat	100625	NM_001252132	380916	Mm.288868	NM_001033439	ENSMUSG00000068015	Lrch1	4832412D13Rik|AI552548|AW215503|Chdc1|mKIAA1016	leucine-rich repeats and calponin homology (CH) domain containing 1	protein-coding
ALL_peak_59088	NO	YES	chr19	12501812	12502137	chr19.12501812	+	10.6331	NA	promoter-TSS (NM_172442)	promoter-TSS (NM_172442)	22	NM_172442	207521	Mm.247695	NM_172442	ENSMUSG00000039982	Dtx4	AI449438|BC044798|D930042H13|RNF155	deltex 4 homolog (Drosophila)	protein-coding
ALL_peak_67650	NO	YES	chr2	126948969	126949258	chr2.126948969	+	10.6331	NA	Intergenic	(TG)n|Simple_repeat|Simple_repeat	-15878	NM_023220	66552	Mm.269928	NM_023220	ENSMUSG00000027366	Sppl2a	2010106G01Rik|C130089K23Rik	signal peptide peptidase like 2A	protein-coding
ALL_peak_20457	NO	YES	chr11	89023752	89024520	chr11.89023752	+	10.6331	NA	Intergenic	Intergenic	24733	NM_009546	217069	Mm.248445	NM_009546	ENSMUSG00000000275	Trim25	AA960166|AL022677|EFP|Zfp147	tripartite motif-containing 25	protein-coding
ALL_peak_85603	NO	YES	chr4	151933028	151933649	chr4.151933028	+	10.6331	NA	promoter-TSS (NM_172704)	promoter-TSS (NM_172704)	-382	NM_172704	230935	Mm.21353	NM_172704	ENSMUSG00000039768	Dnajc11	E030019A03Rik	DnaJ (Hsp40) homolog, subfamily C, member 11	protein-coding
ALL_peak_69981	NO	YES	chr2	170447129	170447369	chr2.170447129	+	10.6121	NA	Intergenic	Intergenic	-19404	NM_001164369	76960	Mm.240850	NM_029815	ENSMUSG00000013523	Bcas1	2210416M21Rik|9030223A09Rik|AI841227|NABC1	breast carcinoma amplified sequence 1	protein-coding
ALL_peak_87076	NO	YES	chr5	31093920	31094294	chr5.31093920	+	10.5716	NA	promoter-TSS (NM_011773)	promoter-TSS (NM_011773)	-580	NM_011773	22784	Mm.1396	NM_011773	ENSMUSG00000029151	Slc30a3	Znt3	solute carrier family 30 (zinc transporter), member 3	protein-coding
ALL_peak_24906	NO	YES	chr12	51964958	51965308	chr12.51964958	+	10.5493	NA	intron (NM_177171, intron 1 of 35)	(CA)n|Simple_repeat|Simple_repeat	6188	NM_177171	320487	Mm.131941	NM_177171	ENSMUSG00000035181	Heatr5a	C230081H03Rik|D930036F22Rik|mKIAA1316	HEAT repeat containing 5A	protein-coding
ALL_peak_51580	NO	YES	chr17	43504782	43505058	chr17.43504782	+	10.5362	NA	Intergenic	(TG)n|Simple_repeat|Simple_repeat	-2147	NM_008585	17287	Mm.5346	NM_008585	ENSMUSG00000023914	Mep1a	AI098089|AW107200|Mep-1|Mep-1a|Mep1	meprin 1 alpha	protein-coding
ALL_peak_68497	NO	YES	chr2	144214370	144214728	chr2.144214370	+	10.5362	NA	Intergenic	(CA)n|Simple_repeat|Simple_repeat	-25259	NM_001033778	433481	Mm.330630	NM_001033778		Gm5535	EG433481	predicted gene 5535	protein-coding
ALL_peak_62258	NO	YES	chr2	11405841	11406101	chr2.11405841	+	10.5362	NA	Intergenic	(TG)n|Simple_repeat|Simple_repeat	-7471	NR_040615	77543	Mm.490670	NR_040615	ENSMUSG00000102674	8030442B05Rik	-	RIKEN cDNA 8030442B05 gene	ncRNA
ALL_peak_60659	NO	YES	chr19	43894545	43894910	chr19.43894545	+	10.5362	NA	intron (NM_028029, intron 4 of 15)	intron (NM_028029, intron 4 of 15)	-14959	NM_001306088	71972	Mm.159024	NM_028029		Dnmbp	2410003L07Rik|2410003M15Rik|TUBA	dynamin binding protein	protein-coding
ALL_peak_83908	NO	YES	chr4	123803525	123803850	chr4.123803525	+	10.5362	NA	intron (NM_183163, intron 1 of 7)	(TG)n|Simple_repeat|Simple_repeat	15812	NM_183163	230726	Mm.37334	NM_183163	ENSMUSG00000043333	Rhbdl2	9130416B15|RRP2	rhomboid, veinlet-like 2 (Drosophila)	protein-coding
ALL_peak_102416	NO	YES	chr7	30196112	30196383	chr7.30196112	+	10.5215	NA	Intergenic	(TG)n|Simple_repeat|Simple_repeat	-1199	NM_009795	12336	Mm.439782	NM_009795	ENSMUSG00000001794	Capns1	Capa-4|Capa4|Capn4|D7Ertd146e	calpain, small subunit 1	protein-coding
ALL_peak_96829	NO	YES	chr6	70103495	70103877	chr6.70103495	+	10.5215	NA	Intergenic	(TC)n|Simple_repeat|Simple_repeat	688489	NM_009075	19895	Mm.17905	NM_009075	ENSMUSG00000053604	Rpia	RPI	ribose 5-phosphate isomerase A	protein-coding
ALL_peak_36545	NO	YES	chr14	56034624	56034891	chr14.56034624	+	10.5215	NA	Intergenic	(CA)n|Simple_repeat|Simple_repeat	-4262	NM_010782	17232	Mm.436621	NM_010782	ENSMUSG00000071361	Mcpt9	MMCP-1|MMCP-9|MMCP9	mast cell protease 9	protein-coding
ALL_peak_13806	NO	YES	chr10	86001386	86001629	chr10.86001386	+	10.5215	NA	intron (NM_177772, intron 1 of 15)	intron (NM_177772, intron 1 of 15)	10353	NM_177772	270757	Mm.107214	NM_177772	ENSMUSG00000050108	Bpifc	4732454E24|Bpil2	BPI fold containing family C	protein-coding
ALL_peak_44603	NO	YES	chr15	100337167	100337484	chr15.100337167	+	10.5215	NA	intron (NM_001081471, intron 1 of 1)	intron (NM_001081471, intron 1 of 1)	2396	NM_001081471	668178	Mm.425943	NM_001081471	ENSMUSG00000058057	Mettl7a3	ENSMUSG00000058057|Gm10035|Ubie3	methyltransferase like 7A3	protein-coding
ALL_peak_26157	NO	YES	chr12	76962056	76962314	chr12.76962056	+	10.4285	NA	promoter-TSS (NM_001146176)	promoter-TSS (NM_001146176)	63	NM_008558	17187	Mm.268548	NM_008558	ENSMUSG00000059436	Max	AA960152|AI875693|bHLHd4|bHLHd5|bHLHd6|bHLHd7|bHLHd8	Max protein	protein-coding
ALL_peak_114052	NO	YES	chr8	116115456	116115751	chr8.116115456	+	10.3293	NA	Intergenic	(TG)n|Simple_repeat|Simple_repeat	-389412	NM_029297	75465	Mm.23114	NM_029297	ENSMUSG00000034467	Dynlrb2	1700009A04Rik|DNLC2B|Dncl2b	dynein light chain roadblock-type 2	protein-coding
ALL_peak_57124	NO	YES	chr18	61033926	61034351	chr18.61033926	+	10.3293	NA	intron (NM_009880, intron 1 of 2)	(CA)n|Simple_repeat|Simple_repeat	2061	NM_009880	12590	Mm.144448	NM_009880	ENSMUSG00000024619	Cdx1	Cdx|Cdx-1	caudal type homeobox 1	protein-coding
ALL_peak_104824	NO	YES	chr7	79734275	79734572	chr7.79734275	+	10.3073	NA	Intergenic	(CA)n|Simple_repeat|Simple_repeat	-1647	NM_175640	103968	Mm.254917	NM_175640	ENSMUSG00000030546	Plin1	6030432J05Rik|Peri|Plin	perilipin 1	protein-coding
ALL_peak_60297	NO	YES	chr19	37018870	37019187	chr19.37018870	+	10.3008	NA	Intergenic	(TG)n|Simple_repeat|Simple_repeat	92949	NM_001080706	107182	Mm.295062	NM_001080706	ENSMUSG00000040565	Btaf1	AI414500|AI447930|E430027O22Rik|TAF170	BTAF1 RNA polymerase II, B-TFIID transcription factor-associated, (Mot1 homolog, S. cerevisiae)	protein-coding
ALL_peak_93857	NO	YES	chr6	7120597	7121014	chr6.7120597	+	10.3008	NA	Intergenic	(TG)n|Simple_repeat|Simple_repeat	164787	NM_001077713	71238	Mm.389086	NM_001077713		Sdhaf3	0610005M07Rik|4933430A16Rik|Acn9	succinate dehydrogenase complex assembly factor 3	protein-coding
ALL_peak_36751	NO	YES	chr14	60045220	60045689	chr14.60045220	+	10.3008	NA	intron (NM_015803, intron 3 of 35)	(TG)n|Simple_repeat|Simple_repeat	41380	NM_015803	50769	Mm.319599	NM_015803	ENSMUSG00000021983	Atp8a2	AI415030|Atpc1b|agil|wl	ATPase, aminophospholipid transporter-like, class I, type 8A, member 2	protein-coding
ALL_peak_114733	NO	YES	chr8	126666217	126666477	chr8.126666217	+	10.3008	NA	Intergenic	(TG)n|Simple_repeat|Simple_repeat	-72911	NM_001164598	270110	Mm.334918	NM_001164598	ENSMUSG00000051495	Irf2bp2	E130305N23Rik|IRF-2BP2	interferon regulatory factor 2 binding protein 2	protein-coding
ALL_peak_113779	NO	YES	chr8	111571805	111572076	chr8.111571805	+	10.3008	NA	intron (NM_001168623, intron 1 of 4)	(TG)n|Simple_repeat|Simple_repeat	33597	NM_001168623	170737	Mm.271578	NM_133206	ENSMUSG00000033545	Znrf1	B830022L21Rik|Rnf42|Zrfp1|nin283	zinc and ring finger 1	protein-coding
ALL_peak_106436	NO	YES	chr7	113038473	113038787	chr7.113038473	+	10.3008	NA	Intergenic	(CA)n|Simple_repeat|Simple_repeat	84668	NM_175279	78748	Mm.349943	NM_175279	ENSMUSG00000098132	Rassf10	4632411J06Rik	Ras association (RalGDS/AF-6) domain family (N-terminal) member 10	protein-coding
ALL_peak_115334	NO	YES	chr9	14347846	14348326	chr9.14347846	+	10.3008	NA	Intergenic	(CATA)n|Simple_repeat|Simple_repeat	33156	NM_028013	71946	Mm.41423	NM_028013	ENSMUSG00000037419	Endod1	2210414F18Rik|2310067E08Rik|C85344	endonuclease domain containing 1	protein-coding
ALL_peak_7830	NO	YES	chr1	159250473	159250808	chr1.159250473	+	10.3008	NA	intron (NM_011931, intron 5 of 19)	(CA)n|Simple_repeat|Simple_repeat	18314	NM_011931	26374	Mm.328135	NM_011931	ENSMUSG00000040782	Rfwd2	AI316802|C80879|Cop1	ring finger and WD repeat domain 2	protein-coding
ALL_peak_75342	NO	YES	chr3	104525438	104525715	chr3.104525438	+	10.3008	NA	Intergenic	(CA)n|Simple_repeat|Simple_repeat	-13658	NM_001310698	269473	Mm.34855	NM_001025067	ENSMUSG00000032913	Lrig2	4632419I10Rik|BB096938|LIG-2	leucine-rich repeats and immunoglobulin-like domains 2	protein-coding
ALL_peak_35277	NO	YES	chr14	31934865	31935204	chr14.31934865	+	10.3008	NA	Intergenic	(TG)n|Simple_repeat|Simple_repeat	-94069	NM_030166	78754	Mm.40681	NM_030166	ENSMUSG00000021903	Galnt15	4631401E18Rik|Galntl2|mpp-GalNAc-T15	UDP-N-acetyl-alpha-D-galactosamine:polypeptide N-acetylgalactosaminyltransferase 15	protein-coding
ALL_peak_33242	NO	YES	chr13	107063855	107064309	chr13.107063855	+	10.3008	NA	Intergenic	(TG)n|Simple_repeat|Simple_repeat	41512	NR_015471	100040322	Mm.133867	NR_015471		3830408C21Rik	-	RIKEN cDNA 3830408C21 gene	ncRNA
ALL_peak_99835	NO	YES	chr6	127266015	127266237	chr6.127266015	+	10.3008	NA	Intergenic	(CA)n|Simple_repeat|Simple_repeat	41841	NR_073373	232386	Mm.257367	NR_073373	ENSMUSG00000107153	Gm38404	D130058E03	predicted gene, 38404	ncRNA
ALL_peak_54648	NO	YES	chr18	8693743	8693978	chr18.8693743	+	10.3008	NA	Intergenic	Intergenic	-518996	NM_008058	14370	Mm.184289	NM_008058	ENSMUSG00000036904	Fzd8	Fz8	frizzled homolog 8 (Drosophila)	protein-coding
ALL_peak_51748	NO	YES	chr17	46032691	46032960	chr17.46032691	+	10.3008	NA	promoter-TSS (NM_001025250)	promoter-TSS (NM_001025250)	-448	NM_009505	22339	Mm.282184	NM_009505	ENSMUSG00000023951	Vegfa	Vegf|Vpf	vascular endothelial growth factor A	protein-coding
ALL_peak_71004	NO	YES	chr3	15073582	15073929	chr3.15073582	+	10.3008	NA	Intergenic	(TG)n|Simple_repeat|Simple_repeat	102554	NR_040550	77127	Mm.195792	NR_040549	ENSMUSG00000098008	A930001A20Rik	-	RIKEN cDNA A930001A20 gene	ncRNA
ALL_peak_82228	NO	YES	chr4	88867313	88867582	chr4.88867313	+	10.3008	NA	Intergenic	(CA)n|Simple_repeat|Simple_repeat	12754	NM_177348	230405	Mm.246593	NM_177348	ENSMUSG00000045364	Ifne	Ifn-tau-1|Ifne1|Ifnt1|Infe1	interferon epsilon	protein-coding
ALL_peak_18392	NO	YES	chr11	49244282	49244745	chr11.49244282	+	10.3008	NA	intron (NM_001110148, intron 1 of 3)	intron (NM_001110148, intron 1 of 3)	322	NM_001110148	17308	Mm.196933	NM_010794	ENSMUSG00000020346	Mgat1	Mgat-1	mannoside acetylglucosaminyltransferase 1	protein-coding
ALL_peak_118143	NO	YES	chr9	70242740	70243014	chr9.70242740	+	10.3008	NA	intron (NM_181072, intron 1 of 27)	intron (NM_181072, intron 1 of 27)	35527	NM_181072	71602	Mm.249311	NM_181072	ENSMUSG00000032220	Myo1e	2310020N23Rik|9130023P14Rik|AA407778|myosin-1e|myr 3	myosin IE	protein-coding
ALL_peak_55896	NO	YES	chr18	36526327	36526685	chr18.36526327	+	10.3008	NA	Intergenic	(GA)n|Simple_repeat|Simple_repeat	-1646	NM_001271544	240215	Mm.135463	NM_172830	ENSMUSG00000024485	Slc4a9	AE4|D630003B07|D630024F24Rik	solute carrier family 4, sodium bicarbonate cotransporter, member 9	protein-coding
ALL_peak_113601	NO	YES	chr8	108583892	108584186	chr8.108583892	+	10.3008	NA	intron (NR_077224, intron 1 of 1)	(CA)n|Simple_repeat|Simple_repeat	638	NR_077224	109215	Mm.65282	NR_077224		Lncbate1	3010033K07Rik|Lnc-BATE1	brown adipose tissue enriched long non-coding RNA 1	ncRNA
ALL_peak_6479	NO	YES	chr1	132084997	132085311	chr1.132084997	+	10.3008	NA	Intergenic	(CA)n|Simple_repeat|Simple_repeat	-17092	NM_172510	213006	Mm.208445	NM_172510	ENSMUSG00000059149	Mfsd4	A230072B04|A930031D07Rik|AI850289	major facilitator superfamily domain containing 4	protein-coding
ALL_peak_61410	NO	YES	chr19	56981173	56981545	chr19.56981173	+	10.3008	NA	intron (NM_146102, intron 1 of 20)	IMPB_01|Satellite|Satellite	27216	NM_146102	226250	Mm.226284	NM_146102	ENSMUSG00000025083	Afap1l2	AU041783|C86904|mKIAA1914	actin filament associated protein 1-like 2	protein-coding
ALL_peak_15219	NO	YES	chr10	111740035	111740647	chr10.111740035	+	10.2831	NA	Intergenic	(TC)n|Simple_repeat|Simple_repeat	134035	NR_046029	629206	Mm.391444	NR_046029		Gm20758	-	predicted gene, 20758	ncRNA
ALL_peak_85888	NO	YES	chr5	3509202	3509619	chr5.3509202	+	10.2831	NA	intron (NM_009873, intron 5 of 7)	(TG)n|Simple_repeat|Simple_repeat	-34423	NM_001042501	68152	Mm.240265	NM_026583	ENSMUSG00000058503	Fam133b	2900022K02Rik|5830415L20Rik	family with sequence similarity 133, member B	protein-coding
ALL_peak_9058	NO	YES	chr1	183419620	183419880	chr1.183419620	+	10.2805	NA	intron (NM_001308052, intron 1 of 8)	(TG)n|Simple_repeat|Simple_repeat	502	NM_001308052	78772	Mm.29003	NM_030175	ENSMUSG00000053461	Hhipl2	4930507C10Rik|AW208802|Hhip3	hedgehog interacting protein-like 2	protein-coding
ALL_peak_79521	NO	YES	chr4	32179369	32179839	chr4.32179369	+	10.2805	NA	Intergenic	(CA)n|Simple_repeat|Simple_repeat	215497	NM_009316	26409	Mm.258589	NM_009316	ENSMUSG00000028284	Map3k7	B430101B05|C87327|Tak1	mitogen-activated protein kinase kinase kinase 7	protein-coding
ALL_peak_50647	NO	YES	chr17	25222296	25222603	chr17.25222296	+	10.2562	NA	promoter-TSS (NM_028789)	promoter-TSS (NM_028789)	-133	NM_028789	74154	Mm.267353	NM_028789	ENSMUSG00000015127	Unkl	1300004G08Rik	unkempt-like (Drosophila)	protein-coding
ALL_peak_55124	NO	YES	chr18	20141596	20141899	chr18.20141596	+	10.2263	NA	Intergenic	(CA)n|Simple_repeat|Simple_repeat	-26974	NM_013504	13505	Mm.33740	NM_013504		Dsc1	1110020A10Rik|AI507491|Dsc1a|Dsc1b	desmocollin 1	protein-coding
ALL_peak_23165	NO	YES	chr12	16015406	16015658	chr12.16015406	+	10.2263	NA	Intergenic	(CGTG)n|Simple_repeat|Simple_repeat	-198747	NM_144551	217410	Mm.491136	NM_144551	ENSMUSG00000020601	Trib2	AW319517|TRB-2|TRB2	tribbles homolog 2 (Drosophila)	protein-coding
ALL_peak_16115	NO	YES	chr10	127642101	127642424	chr10.127642101	+	10.2263	NA	promoter-TSS (NM_009284)	promoter-TSS (NM_009284)	-724	NM_009284	20852	Mm.121721	NM_009284	ENSMUSG00000002147	Stat6	-	signal transducer and activator of transcription 6	protein-coding
ALL_peak_91486	NO	YES	chr5	118459195	118459483	chr5.118459195	+	10.2263	NA	Intergenic	RMER17C2|LTR|ERVK	-101380	NM_172424	76199	Mm.206238	NM_172424	ENSMUSG00000018076	Med13l	2210413I17Rik|6330591G05Rik|9030618F05Rik|Thrap2|Trap240L|mKIAA1025	mediator complex subunit 13-like	protein-coding
ALL_peak_68929	NO	YES	chr2	152811507	152811783	chr2.152811507	+	10.1927	NA	intron (NM_009743, intron 2 of 2)	(CA)n|Simple_repeat|Simple_repeat	19072	NM_001289717	12048	Mm.238213	NM_009743	ENSMUSG00000007659	Bcl2l1	Bcl(X)L|Bcl-XL|Bcl2l|BclX|bcl-x|bcl2-L-1	BCL2-like 1	protein-coding
ALL_peak_28418	NO	YES	chr13	3694891	3695113	chr13.3694891	+	10.1927	NA	Intergenic	(CA)n|Simple_repeat|Simple_repeat	60970	NM_001267724	142688	Mm.253061	NM_178283	ENSMUSG00000033781	Asb13	2210015B19Rik|6430573K02Rik|Asb-13|C85285	ankyrin repeat and SOCS box-containing 13	protein-coding
ALL_peak_80813	NO	YES	chr4	59156742	59157104	chr4.59156742	+	10.1927	NA	Intergenic	(TG)n|Simple_repeat|Simple_repeat	-32627	NM_011673	22234	Mm.198803	NM_011673	ENSMUSG00000028381	Ugcg	AU043821|C80537|Epcs21|GlcT-1|Ugcgl	UDP-glucose ceramide glucosyltransferase	protein-coding
ALL_peak_47559	NO	YES	chr16	58463580	58463852	chr16.58463580	+	10.1927	NA	intron (NM_028523, intron 14 of 15)	(TG)n|Simple_repeat|Simple_repeat	55181	NM_028523	73379	Mm.373589	NM_028523	ENSMUSG00000035107	Dcbld2	1700055P21Rik|AW146002|CLCP1|Esdn	discoidin, CUB and LCCL domain containing 2	protein-coding
ALL_peak_83670	NO	YES	chr4	119666761	119667558	chr4.119666761	+	10.1522	NA	Intergenic	(CA)n|Simple_repeat|Simple_repeat	-8214	NM_008191	14916	Mm.278	NM_008191	ENSMUSG00000032978	Guca2b	AV066530|Gcap2|Ugn	guanylate cyclase activator 2b (retina)	protein-coding
ALL_peak_38784	NO	YES	chr14	101788405	101788713	chr14.101788405	+	10.0773	NA	intron (NM_201529, intron 1 of 30)	(GA)n|Simple_repeat|Simple_repeat	58631	NM_201529	380928	Mm.218981	NM_201529	ENSMUSG00000033060	Lmo7	C78582|FBXO20|Gm914|mKIAA0858	LIM domain only 7	protein-coding
ALL_peak_29706	NO	YES	chr13	31327946	31328600	chr13.31327946	+	10.0773	NA	Intergenic	(CAGAGA)n|Simple_repeat|Simple_repeat	-87187	NR_045957	73924	Mm.417825	NR_045957	ENSMUSG00000087460	4930401O12Rik	-	RIKEN cDNA 4930401O12 gene	ncRNA
ALL_peak_104858	NO	YES	chr7	80435786	80436141	chr7.80435786	+	10.043	NA	Intergenic	(TG)n|Simple_repeat|Simple_repeat	-30527	NM_001081454	18550	Mm.5241	NM_011046	ENSMUSG00000030530	Furin	9130404I01Rik|Fur|PACE|Pcsk3|SPC1	furin (paired basic amino acid cleaving enzyme)	protein-coding
ALL_peak_27465	NO	YES	chr12	102731787	102732059	chr12.102731787	+	10.043	NA	Intergenic	(CA)n|Simple_repeat|Simple_repeat	11738	NM_001142937	64113	Mm.291222	NM_022323		Moap1	AA987038|Map-1|Pnma4	modulator of apoptosis 1	protein-coding
ALL_peak_21548	NO	YES	chr11	107027269	107027553	chr11.107027269	+	10.0052	NA	promoter-TSS (NM_001163473)	promoter-TSS (NM_001163473)	-812	NM_001163473	69066	Mm.40679	NM_001163473		1810010H24Rik	OTTMUSG00000003581	RIKEN cDNA 1810010H24 gene	protein-coding
ALL_peak_76710	NO	YES	chr3	131541788	131542402	chr3.131541788	+	9.97533	NA	Intergenic	(CA)n|Simple_repeat|Simple_repeat	-22673	NM_001289479	23971	Mm.244912	NM_011863	ENSMUSG00000028032	Papss1	AI325286|Asapk|SK1	3'-phosphoadenosine 5'-phosphosulfate synthase 1	protein-coding
ALL_peak_121300	NO	YES	chrX	13918651	13918893	chrX.13918651	+	9.96851	NA	Intergenic	(TG)n|Simple_repeat|Simple_repeat	-72216	NM_001284504	12361	Mm.327591	NM_009806	ENSMUSG00000031012	Cask	DXPri1|DXRib1|LIN-2|Pals3|mLin-2	calcium/calmodulin-dependent serine protein kinase (MAGUK family)	protein-coding
ALL_peak_58984	NO	YES	chr19	10389028	10389273	chr19.10389028	+	9.96851	NA	promoter-TSS (NM_018801)	promoter-TSS (NM_018801)	60	NM_173067	54525	Mm.182654	NM_018801	ENSMUSG00000024743	Syt7	AI851541|B230112P13Rik	synaptotagmin VII	protein-coding
ALL_peak_114132	NO	YES	chr8	117373278	117373529	chr8.117373278	+	9.96851	NA	intron (NM_028941, intron 1 of 20)	(TG)n|Simple_repeat|Simple_repeat	24233	NM_028941	74440	Mm.233181	NM_028941	ENSMUSG00000034390	Cmip	4933407C03Rik|5830471E12Rik|AI314065|AI464126	c-Maf inducing protein	protein-coding
ALL_peak_92930	NO	YES	chr5	140608377	140608626	chr5.140608377	+	9.96851	NA	intron (NM_008494, intron 1 of 7)	(TG)n|Simple_repeat|Simple_repeat	1160	NM_008494	16848	Mm.12834	NM_008494	ENSMUSG00000029570	Lfng	AW061165	LFNG O-fucosylpeptide 3-beta-N-acetylglucosaminyltransferase	protein-coding
ALL_peak_117889	NO	YES	chr9	66171181	66171481	chr9.66171181	+	9.96851	NA	intron (NM_010019, intron 2 of 11)	(CGTG)n|Simple_repeat|Simple_repeat	13105	NM_010019	13143	Mm.304472	NM_010019	ENSMUSG00000032380	Dapk2	-	death-associated protein kinase 2	protein-coding
ALL_peak_64152	NO	YES	chr2	52676693	52676932	chr2.52676693	+	9.96851	NA	promoter-TSS (NM_001037099)	promoter-TSS (NM_001037099)	-203	NM_001037099	12298	Mm.330223	NM_146123	ENSMUSG00000017412	Cacnb4	3110038O15Rik|Cchb4|lh	calcium channel, voltage-dependent, beta 4 subunit	protein-coding
ALL_peak_111993	NO	YES	chr8	79208400	79208719	chr8.79208400	+	9.96851	NA	Intergenic	(GA)n|Simple_repeat|Simple_repeat	40024	NM_026315	67687	Mm.178707	NM_026315	ENSMUSG00000031682	1700011L22Rik	-	RIKEN cDNA 1700011L22 gene	protein-coding
ALL_peak_24017	NO	YES	chr12	32427529	32427943	chr12.32427529	+	9.96851	NA	Intergenic	(CA)n|Simple_repeat|Simple_repeat	48947	NM_001162903	72123	Mm.341352	NM_028111	ENSMUSG00000090946	Ccdc71l	2010109K11Rik|AV375874	coiled-coil domain containing 71 like	protein-coding
ALL_peak_79498	NO	YES	chr4	31697573	31697850	chr4.31697573	+	9.96851	NA	Intergenic	(CA)n|Simple_repeat|Simple_repeat	-266396	NM_172688	26409	Mm.258589	NM_009316	ENSMUSG00000028284	Map3k7	B430101B05|C87327|Tak1	mitogen-activated protein kinase kinase kinase 7	protein-coding
ALL_peak_37059	NO	YES	chr14	66089357	66089602	chr14.66089357	+	9.96851	NA	intron (NM_001271403, intron 12 of 17)	(CA)n|Simple_repeat|Simple_repeat	-11746	NM_009618	11495	Mm.422850	NM_009618	ENSMUSG00000022039	Adam2	AI323749|Ftnb|Ph30-beta	a disintegrin and metallopeptidase domain 2	protein-coding
ALL_peak_119602	NO	YES	chr9	99414142	99414474	chr9.99414142	+	9.96851	NA	intron (NM_008624, intron 1 of 5)	(CA)n|Simple_repeat|Simple_repeat	22404	NM_008624	17532	Mm.2045	NM_008624	ENSMUSG00000032470	Mras	2900078C09Rik|AI326250	muscle and microspikes RAS	protein-coding
ALL_peak_17451	NO	YES	chr11	30197260	30197516	chr11.30197260	+	9.96851	NA	intron (NM_175836, intron 1 of 34)	(TC)n|Simple_repeat|Simple_repeat	869	NM_009260	20742	Mm.123110	NM_009260	ENSMUSG00000020315	Sptbn1	9930031C03Rik|AL033301|SPTB2|Spnb-2|Spnb2|elf1|elf3|mKIAA4049	spectrin beta, non-erythrocytic 1	protein-coding
ALL_peak_33647	NO	YES	chr13	114459006	114459271	chr13.114459006	+	9.96851	NA	promoter-TSS (NM_001301375)	promoter-TSS (NM_001301375)	-187	NM_001301373	14313	Mm.4913	NM_008046	ENSMUSG00000021765	Fst	AL033346|FS	follistatin	protein-coding
ALL_peak_54800	NO	YES	chr18	12273331	12273605	chr18.12273331	+	9.96851	NA	intron (NM_001190371, intron 6 of 9)	(TG)n|Simple_repeat|Simple_repeat	32252	NM_001190371	225187	Mm.53865	NM_001190371	ENSMUSG00000057766	Ankrd29	G630054C21|G630054C21Rik|Gm95	ankyrin repeat domain 29	protein-coding
ALL_peak_26084	NO	YES	chr12	75833088	75833671	chr12.75833088	+	9.96851	NA	intron (NM_001005510, intron 1 of 115)	(CA)n|Simple_repeat|Simple_repeat	15061	NM_001005510	319565	Mm.26652	NM_001005510	ENSMUSG00000063450	Syne2	6820443O06Rik|AW546258|D12Ertd777e|NUA|Nesp2g|mKIAA1011	spectrin repeat containing, nuclear envelope 2	protein-coding
ALL_peak_36769	NO	YES	chr14	60275294	60275586	chr14.60275294	+	9.96851	NA	intron (NM_144843, intron 1 of 13)	(TG)n|Simple_repeat|Simple_repeat	10235	NM_144843	219135	Mm.247007	NM_144843	ENSMUSG00000021987	Mtmr6	4022440C11Rik|AI428804|AU041072	myotubularin related protein 6	protein-coding
ALL_peak_67079	NO	YES	chr2	116064260	116064655	chr2.116064260	+	9.96851	NA	5' UTR (NM_001159570, exon 1 of 13)	5' UTR (NM_001159570, exon 1 of 13)	164	NM_001159569	17536	Mm.247566	NM_010825	ENSMUSG00000027210	Meis2	A430109D20Rik|Mrg1|Stra10	Meis homeobox 2	protein-coding
ALL_peak_26332	NO	YES	chr12	80103052	80103316	chr12.80103052	+	9.96851	NA	Intergenic	(GA)n|Simple_repeat|Simple_repeat	9829	NM_007564	12192	Mm.235132	NM_007564	ENSMUSG00000021127	Zfp36l1	AW742437|AW743212|Berg36|Brf1|D530020L18Rik|ERF1|TIS11b|cMG1	zinc finger protein 36, C3H type-like 1	protein-coding
ALL_peak_93174	NO	YES	chr5	144277829	144278181	chr5.144277829	+	9.96851	NA	intron (NR_040432, intron 2 of 2)	(CA)n|Simple_repeat|Simple_repeat	944	NR_040432	100504231	Mm.441035	NR_040432	ENSMUSG00000086894	Gm15708	OTTMUSG00000025583	predicted gene 15708	ncRNA
ALL_peak_55389	NO	YES	chr18	25753621	25753987	chr18.25753621	+	9.96321	NA	5' UTR (NM_133195, exon 1 of 13)	5' UTR (NM_133195, exon 1 of 13)	179	NM_133195	108013	Mm.266435	NM_133195	ENSMUSG00000024268	Celf4	A230070D14Rik|BRUNOL-4|Brul4|Brunol4|C130060B05Rik	CUGBP, Elav-like family member 4	protein-coding
ALL_peak_105871	NO	YES	chr7	101540585	101540853	chr7.101540585	+	9.96321	NA	Intergenic	(TG)n|Simple_repeat|Simple_repeat	15083	NM_007490	11871	Mm.439746	NM_007490	ENSMUSG00000092517	Art2a-ps	ARTC2|Art2a|Ly92a|Rt-6|Rt6|Rt6-1	ADP-ribosyltransferase 2a, pseudogene	protein-coding
ALL_peak_100329	NO	YES	chr6	136687685	136688250	chr6.136687685	+	9.96321	NA	Intergenic	(CA)n|Simple_repeat|Simple_repeat	-26074	NM_025806	66857	Mm.3311	NM_025806	ENSMUSG00000030214	Plbd1	1100001H23Rik	phospholipase B domain containing 1	protein-coding
ALL_peak_75580	NO	YES	chr3	109157735	109157982	chr3.109157735	+	9.96321	NA	intron (NM_172685, intron 5 of 9)	(TG)n|Simple_repeat|Simple_repeat	34709	NM_172685	229731	Mm.33574	NM_172685	ENSMUSG00000040322	Slc25a24	2610016M12Rik	solute carrier family 25 (mitochondrial carrier, phosphate carrier), member 24	protein-coding
ALL_peak_86796	NO	YES	chr5	24427828	24428132	chr5.24427828	+	9.96321	NA	intron (NM_009207, intron 2 of 22)	(CA)n|Simple_repeat|Simple_repeat	459	NM_001253892	20535	Mm.4580	NM_009207	ENSMUSG00000028962	Slc4a2	Ae2|B3RP	solute carrier family 4 (anion exchanger), member 2	protein-coding
ALL_peak_91537	NO	YES	chr5	119179009	119179355	chr5.119179009	+	9.94889	NA	Intergenic	(TG)n|Simple_repeat|Simple_repeat	20836	NR_046033	665194	Mm.491047	NR_046033	ENSMUSG00000107334	Gm7538	EG665194	predicted gene 7538	ncRNA
ALL_peak_59579	NO	YES	chr19	23135361	23135635	chr19.23135361	+	9.94807	NA	Intergenic	CpG	-5728	NM_010638	16601	Mm.291595	NM_010638	ENSMUSG00000033863	Klf9	2310051E17Rik|AA589643|BTEB-1|Bteb1|ENSMUSG00000055440|Gm9971	Kruppel-like factor 9	protein-coding
ALL_peak_74928	NO	YES	chr3	96594423	96594979	chr3.96594423	+	9.94437	NA	promoter-TSS (NM_001293701)	promoter-TSS (NM_001293701)	-520	NM_027241	69870	Mm.292739	NM_027241	ENSMUSG00000028104	Polr3gl	2010003I19Rik	polymerase (RNA) III (DNA directed) polypeptide G like	protein-coding
ALL_peak_51532	NO	YES	chr17	43064578	43064865	chr17.43064578	+	9.91641	NA	intron (NM_178589, intron 3 of 5)	(TG)n|Simple_repeat|Simple_repeat	48166	NM_178589	94185	Mm.200792	NM_178589	ENSMUSG00000023915	Tnfrsf21	AA959878|DR6|R74815|TR7	tumor necrosis factor receptor superfamily, member 21	protein-coding
ALL_peak_97542	NO	YES	chr6	82854569	82854850	chr6.82854569	+	9.91641	NA	Intergenic	(CA)n|Simple_repeat|Simple_repeat	27144	NR_040520	69652	Mm.96357	NR_040520	ENSMUSG00000100291	2310069B03Rik	-	RIKEN cDNA 2310069B03 gene	ncRNA
ALL_peak_58689	NO	YES	chr19	3634204	3634819	chr19.3634204	+	9.86791	NA	intron (NM_008513, intron 5 of 22)	(TG)n|Simple_repeat|Simple_repeat	52053	NM_008513	16973	Mm.274581	NM_008513	ENSMUSG00000024913	Lrp5	BMND1|HBM|LR3|LRP7|OPPG|mKIAA4142	low density lipoprotein receptor-related protein 5	protein-coding
ALL_peak_46492	NO	YES	chr16	36693480	36693827	chr16.36693480	+	9.8639	NA	promoter-TSS (NM_001285791)	promoter-TSS (NM_001285791)	-325	NM_001285788	106347	Mm.17807	NM_134109	ENSMUSG00000022900	Ildr1	AU041483|AU044638	immunoglobulin-like domain containing receptor 1	protein-coding
ALL_peak_29365	NO	YES	chr13	23917943	23918257	chr13.23917943	+	9.8639	NA	Intergenic	(TG)n|Simple_repeat|Simple_repeat	-3093	NM_177016	319848	Mm.97959	NM_177016	ENSMUSG00000021336	Slc17a4	9130214H05Rik	solute carrier family 17 (sodium phosphate), member 4	protein-coding
ALL_peak_100581	NO	YES	chr6	140108408	140108728	chr6.140108408	+	9.8639	NA	Intergenic	(CA)n|Simple_repeat|Simple_repeat	67043	NM_007605	12344	Mm.12817	NM_007605	ENSMUSG00000041791	Capza3	510-4|Cappa3|Gsg3|Tex8|repro32	capping protein (actin filament) muscle Z-line, alpha 3	protein-coding
ALL_peak_36646	NO	YES	chr14	58071595	58071850	chr14.58071595	+	9.8639	NA	promoter-TSS (NM_013518)	promoter-TSS (NM_013518)	-964	NM_013518	14180	Mm.8846	NM_013518		Fgf9	Eks	fibroblast growth factor 9	protein-coding
ALL_peak_104959	NO	YES	chr7	82648991	82649278	chr7.82648991	+	9.8639	NA	promoter-TSS (NM_177894)	promoter-TSS (NM_177894)	520	NM_175317	101592	Mm.238020	NM_175317	ENSMUSG00000038563	Eftud1	4932434J20Rik|6030468D11Rik|AI451340|AU019507|AU022896|D7Ertd791e	elongation factor Tu GTP binding domain containing 1	protein-coding
ALL_peak_18889	NO	YES	chr11	58168563	58168950	chr11.58168563	+	9.8569	NA	promoter-TSS (NM_001166670)	promoter-TSS (NM_001166670)	-217	NM_172558	216766	Mm.275349	NM_172558	ENSMUSG00000037275	Gemin5	AA407055|AA407208|AI451603|BB194447|C330013N08	gem (nuclear organelle) associated protein 5	protein-coding
ALL_peak_23235	NO	YES	chr12	17000406	17000857	chr12.17000406	+	9.84912	NA	promoter-TSS (NM_172574)	promoter-TSS (NM_172574)	-513	NM_001161111	217430	Mm.379451	NM_172574	ENSMUSG00000045679	Pqlc3	C78076|E030024M05Rik	PQ loop repeat containing	protein-coding
ALL_peak_1518	NO	YES	chr1	36087865	36088171	chr1.36087865	+	9.84451	NA	intron (NM_015818, intron 1 of 1)	(TG)n|Simple_repeat|Simple_repeat	19618	NM_015818	50785	Mm.213566	NM_015818	ENSMUSG00000045216	Hs6st1	6Ost1	heparan sulfate 6-O-sulfotransferase 1	protein-coding
ALL_peak_101878	NO	YES	chr7	19932739	19933135	chr7.19932739	+	9.73813	NA	Intergenic	(CA)n|Simple_repeat|Simple_repeat	-11794	NM_027514	52118	Mm.227506	NM_027514	ENSMUSG00000040511	Pvr	3830421F03Rik|CD155|D7Ertd458e|HVED|PVS|Taa1|Tage4|mE4|necl-5	poliovirus receptor	protein-coding
ALL_peak_60727	NO	YES	chr19	45014638	45014918	chr19.45014638	+	9.73813	NA	promoter-TSS (NM_001130525)	promoter-TSS (NM_001130525)	-398	NM_145503	226154	Mm.28204	NM_145503	ENSMUSG00000035342	Lzts2	BC014695|LAPSER1|mKIAA1813	leucine zipper, putative tumor suppressor 2	protein-coding
ALL_peak_6584	NO	YES	chr1	134067515	134067811	chr1.134067515	+	9.73813	NA	Intergenic	(CA)n|Simple_repeat|Simple_repeat	11492	NM_007570	12227	Mm.392646	NM_007570	ENSMUSG00000020423	Btg2	AA959598|APRO1|Pc3|TIS21	B cell translocation gene 2, anti-proliferative	protein-coding
ALL_peak_46232	NO	YES	chr16	31234471	31234917	chr16.31234471	+	9.67017	NA	intron (NR_035427, intron 1 of 2)	intron (NR_035427, intron 1 of 2)	-33456	NM_030138	78618	Mm.274646	NM_030138	ENSMUSG00000049076	Acap2	4832442G16|9530039J15Rik|CNT-B2|Centb2|mKIAA0041	ArfGAP with coiled-coil, ankyrin repeat and PH domains 2	protein-coding
ALL_peak_76216	NO	YES	chr3	121672416	121672690	chr3.121672416	+	9.67017	NA	intron (NM_001033814, intron 2 of 5)	intron (NM_001033814, intron 2 of 5)	1790	NM_001033814	619318	Mm.371258	NM_001033814	ENSMUSG00000074248	4930432M17Rik	-	RIKEN cDNA 4930432M17 gene	protein-coding
ALL_peak_80778	NO	YES	chr4	58271712	58271984	chr4.58271712	+	9.67017	NA	Intergenic	(CA)n|Simple_repeat|Simple_repeat	-14114	NM_001037128	18198	Mm.16148	NM_010944	ENSMUSG00000057280	Musk	Mdk4|Mlk|Nsk1|Nsk2|Nsk3	muscle, skeletal, receptor tyrosine kinase	protein-coding
ALL_peak_101821	NO	YES	chr7	18859174	18859477	chr7.18859174	+	9.63623	NA	TTS (NM_153761)	TTS (NM_153761)	19359	NM_153760	243864	Mm.233503	NM_153760	ENSMUSG00000040987	Mill2	Micb	MHC I like leukocyte 2	protein-coding
ALL_peak_19086	NO	YES	chr11	62558679	62558957	chr11.62558679	+	9.63623	NA	Intergenic	B3A|SINE|B2	7087	NM_001313984	22187	Mm.371592	NM_011664		Ubb	AL033289|Rps27a|Uba52|Ubb2|Ubc	ubiquitin B	protein-coding
ALL_peak_111773	NO	YES	chr8	74902322	74902580	chr8.74902322	+	9.63623	NA	Intergenic	(CA)n|Simple_repeat|Simple_repeat	29277	NM_027837	71597	Mm.158735	NM_027837	ENSMUSG00000031621	Isx	9130012O13Rik|Pix-1	intestine specific homeobox	protein-coding
ALL_peak_97774	NO	YES	chr6	86569752	86569997	chr6.86569752	+	9.63623	NA	Intergenic	(TG)n|Simple_repeat|Simple_repeat	42473	NR_037961	72012	Mm.349174	NR_037960	ENSMUSG00000097048	1600020E01Rik	-	RIKEN cDNA 1600020E01 gene	ncRNA
ALL_peak_102364	NO	YES	chr7	28969575	28969861	chr7.28969575	+	9.63623	NA	Intergenic	Intergenic	-7438	NM_021895	60595	Mm.81144	NM_021895	ENSMUSG00000054808	Actn4	C77391	actinin alpha 4	protein-coding
ALL_peak_14602	NO	YES	chr10	99511317	99511628	chr10.99511317	+	9.63623	NA	Intergenic	(CA)n|Simple_repeat|Simple_repeat	-97699	NR_038019	100504202	Mm.403801	NR_038019		Gm20110	-	predicted gene, 20110	ncRNA
ALL_peak_6585	NO	YES	chr1	134079671	134079940	chr1.134079671	+	9.63623	NA	promoter-TSS (NM_007570)	promoter-TSS (NM_007570)	-650	NM_007570	12227	Mm.392646	NM_007570	ENSMUSG00000020423	Btg2	AA959598|APRO1|Pc3|TIS21	B cell translocation gene 2, anti-proliferative	protein-coding
ALL_peak_43575	NO	YES	chr15	79347870	79348288	chr15.79347870	+	9.63623	NA	promoter-TSS (NM_001304832)	promoter-TSS (NM_001304832)	18	NM_001304831	17133	Mm.86646	NM_010755	ENSMUSG00000042622	Maff	-	v-maf musculoaponeurotic fibrosarcoma oncogene family, protein F (avian)	protein-coding
ALL_peak_88675	NO	YES	chr5	64853462	64853750	chr5.64853462	+	9.63623	NA	Intergenic	(CA)n|Simple_repeat|Simple_repeat	50083	NM_008453	16599	Mm.392759	NM_008453	ENSMUSG00000029178	Klf3	9930027G08Rik|AL024007|Bklf|Tef-2	Kruppel-like factor 3 (basic)	protein-coding
ALL_peak_84290	NO	YES	chr4	130276322	130276681	chr4.130276322	+	9.63623	NA	promoter-TSS (NM_172702)	promoter-TSS (NM_172702)	-915	NM_172702	230779	Mm.45132	NM_172702	ENSMUSG00000023232	Serinc2	2310004K20Rik|AW121759|FKSG84|TDE2|Tde2l	serine incorporator 2	protein-coding
ALL_peak_117833	NO	YES	chr9	65202400	65202797	chr9.65202400	+	9.63623	NA	Intergenic	B3A|SINE|B2	-12092	NM_177460	214424	Mm.31129	NM_177460	ENSMUSG00000032392	Parp16	ARTD15|BC055447|C79952|PARP-16	poly (ADP-ribose) polymerase family, member 16	protein-coding
ALL_peak_83586	NO	YES	chr4	117981377	117981795	chr4.117981377	+	9.63623	NA	intron (NM_001285520, intron 5 of 11)	C-rich|Low_complexity|Low_complexity	-51823	NM_009711	11876	Mm.56897	NM_009711	ENSMUSG00000028539	Artn	neublastin	artemin	protein-coding
ALL_peak_45262	NO	YES	chr16	10373791	10374072	chr16.10373791	+	9.63623	NA	intron (NM_001291001, intron 5 of 6)	(TC)n|Simple_repeat|Simple_repeat	21517	NM_001099275	70426	Mm.142181	NM_001099275	ENSMUSG00000039179	Tekt5	3300001K11Rik	tektin 5	protein-coding
ALL_peak_64359	NO	YES	chr2	57117680	57117981	chr2.57117680	+	9.63623	NA	intron (NM_001139509, intron 1 of 7)	(CA)n|Simple_repeat|Simple_repeat	-2792	NM_013613	18227	Mm.3507	NM_013613	ENSMUSG00000026826	Nr4a2	HZF-3|NOT|Nurr1|RNR-1|TINOR|TINUR	nuclear receptor subfamily 4, group A, member 2	protein-coding
ALL_peak_83980	NO	YES	chr4	125124774	125125012	chr4.125124774	+	9.63623	NA	intron (NM_153159, intron 2 of 5)	(TG)n|Simple_repeat|Simple_repeat	2988	NM_153159	230738	Mm.402	NM_153159	ENSMUSG00000042677	Zc3h12a	BC036563|MCPIP|Mcpip1	zinc finger CCCH type containing 12A	protein-coding
ALL_peak_55115	NO	YES	chr18	19959842	19960297	chr18.19959842	+	9.63623	NA	TTS (NM_007882)	TTS (NM_007882)	42028	NM_007882	13507	Mm.89935	NM_007882	ENSMUSG00000059898	Dsc3	5430426I24Rik	desmocollin 3	protein-coding
ALL_peak_43440	NO	YES	chr15	76618201	76618464	chr15.76618201	+	9.63623	NA	Intergenic	(TG)n|Simple_repeat|Simple_repeat	-1480	NM_028064	72027	Mm.276829	NM_028064	ENSMUSG00000063354	Slc39a4	1600025H15Rik|AU041686|AWMS2|ZIP4	solute carrier family 39 (zinc transporter), member 4	protein-coding
ALL_peak_15978	NO	YES	chr10	125362825	125363141	chr10.125362825	+	9.63623	NA	Intergenic	(TC)n|Simple_repeat|Simple_repeat	-34448	NM_011391	20503	Mm.29161	NM_011391	ENSMUSG00000020102	Slc16a7	4921534N07Rik|Mct2	solute carrier family 16 (monocarboxylic acid transporters), member 7	protein-coding
ALL_peak_21676	NO	YES	chr11	109087223	109087592	chr11.109087223	+	9.63623	NA	Intergenic	(TG)n|Simple_repeat|Simple_repeat	56962	NR_037978	268498	Mm.227970	NM_001085512	ENSMUSG00000078605	E030025P04Rik	Gm664	RIKEN cDNA E030025P04 gene	ncRNA
ALL_peak_20486	NO	YES	chr11	89303205	89303621	chr11.89303205	+	9.63623	NA	promoter-TSS (NM_008711)	promoter-TSS (NM_008711)	-854	NM_008711	18121	Mm.135266	NM_008711	ENSMUSG00000048616	Nog	-	noggin	protein-coding
ALL_peak_8492	NO	YES	chr1	171440209	171440508	chr1.171440209	+	9.62723	NA	intron (NM_172647, intron 1 of 9)	(CA)n|Simple_repeat|Simple_repeat	2797	NM_172647	16456	Mm.294882	NM_172647	ENSMUSG00000038235	F11r	9130004G24|AA638916|ESTM33|JAM|JAM-1|JAM-A|Jcam|Jcam1|Ly106	F11 receptor	protein-coding
ALL_peak_49406	NO	YES	chr16	94509047	94509468	chr16.94509047	+	9.60652	NA	intron (NM_007834, intron 3 of 7)	RSINE1|SINE|B4	17372	NM_007834	13185	Mm.7472	NM_007834	ENSMUSG00000022898	Dscr3	AW538125|Dcra	Down syndrome critical region gene 3	protein-coding
ALL_peak_36037	NO	YES	chr14	46690532	46691082	chr14.46690532	+	9.57348	NA	Intergenic	(CA)n|Simple_repeat|Simple_repeat	-17032	NR_131909	328385	Mm.271545	NR_131909		D330046F09Rik	Gm808	RIKEN cDNA D330046F09 gene	ncRNA
ALL_peak_42496	NO	YES	chr15	57693513	57693800	chr15.57693513	+	9.57348	NA	Intergenic	(CA)n|Simple_repeat|Simple_repeat	-1011	NM_199449	387609	Mm.36557	NM_199449	ENSMUSG00000071757	Zhx2	Afr-1|Afr1|Raf|mKIAA0854	zinc fingers and homeoboxes 2	protein-coding
ALL_peak_10786	NO	YES	chr10	24151075	24151519	chr10.24151075	+	9.55085	NA	intron (NM_016797, intron 1 of 9)	(CA)n|Simple_repeat|Simple_repeat	1980	NM_016797	53331	Mm.248042	NM_016797	ENSMUSG00000019998	Stx7	AI315064|AI317144|AW107239|Syn7	syntaxin 7	protein-coding
ALL_peak_117030	NO	YES	chr9	50593680	50593947	chr9.50593680	+	9.5351	NA	Intergenic	(TG)n|Simple_repeat|Simple_repeat	10036	NM_025848	66925	Mm.10406	NM_025848	ENSMUSG00000000171	Sdhd	3110001M13Rik|AVLL5809|C78570|PRO19626	succinate dehydrogenase complex, subunit D, integral membrane protein	protein-coding
ALL_peak_62609	NO	YES	chr2	18415438	18415721	chr2.18415438	+	9.5351	NA	Intergenic	(CA)n|Simple_repeat|Simple_repeat	-22749	NM_001190817	13418	Mm.246674	NM_007869	ENSMUSG00000026740	Dnajc1	4733401K02Rik|AA960110|D230036H06Rik|Dnajl1|ERdj1|ERj1p|MTJ1	DnaJ (Hsp40) homolog, subfamily C, member 1	protein-coding
ALL_peak_22409	NO	YES	chr11	120087222	120087474	chr11.120087222	+	9.5351	NA	promoter-TSS (NM_009734)	promoter-TSS (NM_009734)	-521	NM_009734	12009	Mm.2556	NM_009734	ENSMUSG00000039781	Cep131	AZ1|Azi|Azi1	centrosomal protein 131	protein-coding
ALL_peak_49907	NO	YES	chr17	8051168	8051445	chr17.8051168	+	9.5351	NA	intron (NM_001033442, intron 2 of 3).2	(CA)n|Simple_repeat|Simple_repeat	49922	NM_001033442	381059	Mm.490353	NM_001033442		Gm1604b	ENSMUSG00000073470|Gm1604	predicted gene 1604b	protein-coding
ALL_peak_114156	NO	YES	chr8	117700445	117700714	chr8.117700445	+	9.5351	NA	Intergenic	(TG)n|Simple_repeat|Simple_repeat	-1367	NM_008290	15486	Mm.276466	NM_008290	ENSMUSG00000031844	Hsd17b2	AI194836|AI194967|AI255511	hydroxysteroid (17-beta) dehydrogenase 2	protein-coding
ALL_peak_57438	NO	YES	chr18	66442184	66442510	chr18.66442184	+	9.5351	NA	Intergenic	(TG)n|Simple_repeat|Simple_repeat	-16257	NM_021451	58801	Mm.271878	NM_021451	ENSMUSG00000024521	Pmaip1	Noxa	phorbol-12-myristate-13-acetate-induced protein 1	protein-coding
ALL_peak_12527	NO	YES	chr10	61452907	61453282	chr10.61452907	+	9.52185	NA	promoter-TSS (NM_010124)	promoter-TSS (NM_010124)	-425	NM_010124	13688	Mm.259516	NM_010124	ENSMUSG00000020091	Eif4ebp2	2810011I19Rik|4E-BP2|AA792569|BC010348|PHAS-II	eukaryotic translation initiation factor 4E binding protein 2	protein-coding
ALL_peak_52355	NO	YES	chr17	57202476	57202766	chr17.57202476	+	9.51445	NA	Intergenic	(TG)n|Simple_repeat|Simple_repeat	-8440	NM_019418	50930	Mm.483369	NM_019418	ENSMUSG00000005824	Tnfsf14	HVEM-L|HVEML|LIGHT|LTg|Ly113	tumor necrosis factor (ligand) superfamily, member 14	protein-coding
ALL_peak_54027	NO	YES	chr17	87550930	87551400	chr17.87550930	+	9.51445	NA	Intergenic	RLTR20C2_MM|LTR|ERVK	-84814	NM_008532	17075	Mm.4259	NM_008532	ENSMUSG00000045394	Epcam	CD326|EGP|EGP-2|Egp314|Ep-CAM|EpCAM1|GA733-2|Ly74|TROP1|Tacsd1|Tacstd1|gp40	epithelial cell adhesion molecule	protein-coding
ALL_peak_106331	NO	YES	chr7	111168488	111168729	chr7.111168488	+	9.51131	NA	Intergenic	(GA)n|Simple_repeat|Simple_repeat	-45933	NR_015573	75479	Mm.381620	NR_015573		1700012D14Rik	-	RIKEN cDNA 1700012D14 gene	ncRNA
ALL_peak_102102	NO	YES	chr7	24372165	24372595	chr7.24372165	+	9.51131	NA	intron (NM_008433, intron 1 of 8)	intron (NM_008433, intron 1 of 8)	2117	NM_001163510	16534	Mm.9911	NM_008433	ENSMUSG00000054342	Kcnn4	IK1|IKCA1|KCA4|KCa3.1|SK4|SKCas|mIKCa1	potassium intermediate/small conductance calcium-activated channel, subfamily N, member 4	protein-coding
ALL_peak_39716	NO	YES	chr14	119973990	119974549	chr14.119973990	+	9.49061	NA	Intergenic	(CA)n|Simple_repeat|Simple_repeat	68166	NM_001001490	239283	Mm.138520	NM_001001490	ENSMUSG00000044819	Oxgr1	Cysltr3|Gm299|Gpr80|Gpr99|P2Y15	oxoglutarate (alpha-ketoglutarate) receptor 1	protein-coding
ALL_peak_51259	NO	YES	chr17	37002114	37002373	chr17.37002114	+	9.44934	NA	promoter-TSS (NM_001168501)	promoter-TSS (NM_001168501)	-239	NM_001168501	22715	Mm.305561	NM_009559	ENSMUSG00000036036	Zfp57	G19|Zfp-57	zinc finger protein 57	protein-coding
ALL_peak_2578	NO	YES	chr1	58801828	58802242	chr1.58801828	+	9.44934	NA	promoter-TSS (NM_001277926)	promoter-TSS (NM_001277926)	-467	NM_001080126	12370	Mm.336851	NM_009812	ENSMUSG00000026029	Casp8	CASP-8|FLICE|MACH|Mch5	caspase 8	protein-coding
ALL_peak_107872	NO	YES	chr7	141476517	141476827	chr7.141476517	+	9.40767	NA	intron (NM_001252588, intron 1 of 7)	(TG)n|Simple_repeat|Simple_repeat	292	NM_001252588	64540	Mm.489619	NM_053082	ENSMUSG00000025511	Tspan4	AI325509|AI746565|D130042I01Rik|NAG-2|Tm4sf7|Tspan-4	tetraspanin 4	protein-coding
ALL_peak_60731	NO	YES	chr19	45047997	45048249	chr19.45047997	+	9.40767	NA	intron (NM_001178013, intron 1 of 9)	(TG)n|Simple_repeat|Simple_repeat	547	NM_001178012	94280	Mm.36169	NM_053197	ENSMUSG00000025212	Sfxn3	-	sideroflexin 3	protein-coding
ALL_peak_21366	NO	YES	chr11	103347304	103347749	chr11.103347304	+	9.37714	NA	intron (NR_045346, intron 3 of 3)	RLTR17B_Mm|LTR|ERVK	2773	NR_045346	653030	Mm.440684	NR_045346	ENSMUSG00000085887	Arhgap27os3	F830206d12rik|Gm11648|OTTMUSG00000003073	Rho GTPase activating protein 27, opposite strand 3	ncRNA
ALL_peak_84274	NO	YES	chr4	130102630	130102940	chr4.130102630	+	9.37714	NA	Intergenic	Intergenic	-4771	NM_026441	67898	Mm.20818	NM_026441	ENSMUSG00000028779	Pef1	2600002E23Rik|Peflin	penta-EF hand domain containing 1	protein-coding
ALL_peak_115661	NO	YES	chr9	21768129	21768423	chr9.21768129	+	9.32154	NA	3' UTR (NM_145611, exon 12 of 12)	3' UTR (NM_145611, exon 12 of 12)	-7990	NM_026282	67629	Mm.295642	NM_026282	ENSMUSG00000074476	Spc24	2410030K01Rik|AV109292|Spbc24	SPC24, NDC80 kinetochore complex component, homolog (S. cerevisiae)	protein-coding
ALL_peak_115639	NO	YES	chr9	21338653	21338879	chr9.21338653	+	9.30626	NA	intron (NM_152808, intron 2 of 21)	(TG)n|Simple_repeat|Simple_repeat	938	NM_152808	68682	Mm.148425	NM_152808	ENSMUSG00000057193	Slc44a2	1110028E10Rik|CTL2	solute carrier family 44, member 2	protein-coding
ALL_peak_61782	NO	YES	chr2	3727157	3727422	chr2.3727157	+	9.30394	NA	intron (NM_025626, intron 1 of 3)	(TG)n|Simple_repeat|Simple_repeat	13831	NM_025626	66540	Mm.277864	NM_025626	ENSMUSG00000026655	Fam107b	3110001A13Rik|AA589595|AA959793|AI132312	family with sequence similarity 107, member B	protein-coding
ALL_peak_104855	NO	YES	chr7	80339755	80340034	chr7.80339755	+	9.30394	NA	intron (NM_133952, intron 1 of 19)	(GA)n|Simple_repeat|Simple_repeat	325	NM_133952	101869	Mm.243024	NM_133952	ENSMUSG00000030533	Unc45a	AW538196	unc-45 homolog A (C. elegans)	protein-coding
ALL_peak_116716	NO	YES	chr9	45203385	45203636	chr9.45203385	+	9.30394	NA	intron (NM_001198971, intron 1 of 4)	(CA)n|Simple_repeat|Simple_repeat	565	NM_145403	214523	Mm.436756	NM_145403	ENSMUSG00000032091	Tmprss4	mCAP2	transmembrane protease, serine 4	protein-coding
ALL_peak_74666	NO	YES	chr3	90638861	90639117	chr3.90638861	+	9.30394	NA	Intergenic	Intergenic	-15313	NM_199422	381493	Mm.291525	NM_199422		S100a7a	AY465109|Gm1020|S100A7L1|S100A7f|S100a15|S100a15a|S100a17l1	S100 calcium binding protein A7A	protein-coding
ALL_peak_923	NO	YES	chr1	23256440	23256645	chr1.23256440	+	9.30394	NA	Intergenic	CpG	-15727	NR_029533	387225		NR_029533	ENSMUSG00000065405	Mir30a	Mirn30a|mir-30a|mmu-mir-30a	microRNA 30a	ncRNA
ALL_peak_32129	NO	YES	chr13	83603750	83604038	chr13.83603750	+	9.30394	NA	intron (NM_025282, intron 4 of 10)	(TG)n|Simple_repeat|Simple_repeat	99860	NM_025282	17260	Mm.24001	NM_025282	ENSMUSG00000005583	Mef2c	5430401D19Rik|9930028G15Rik|AV011172|Mef2	myocyte enhancer factor 2C	protein-coding
ALL_peak_114169	NO	YES	chr8	117900368	117900603	chr8.117900368	+	9.30394	NA	Intergenic	(GA)n|Simple_repeat|Simple_repeat	-98556	NM_026758	68533	Mm.181836	NM_026758	ENSMUSG00000031843	Mphosph6	1110001M01Rik|AA536809|C86426	M phase phosphoprotein 6	protein-coding
ALL_peak_92793	NO	YES	chr5	138687381	138687617	chr5.138687381	+	9.30394	NA	Intergenic	(CA)n|Simple_repeat|Simple_repeat	64640	NM_183025	243308	Mm.36612	NM_183025	ENSMUSG00000056014	A430033K04Rik	C86988	RIKEN cDNA A430033K04 gene	protein-coding
ALL_peak_68554	NO	YES	chr2	145785276	145785531	chr2.145785276	+	9.30394	NA	promoter-TSS (NM_028724)	promoter-TSS (NM_028724)	-713	NM_028724	74030	Mm.228799	NM_028724	ENSMUSG00000001768	Rin2	2010003K16Rik|4632403N06Rik|AW821980|RASSF4	Ras and Rab interactor 2	protein-coding
ALL_peak_99599	NO	YES	chr6	122825123	122825418	chr6.122825123	+	9.30394	NA	intron (NM_021899, intron 1 of 10)	intron (NM_021899, intron 1 of 10)	5086	NM_021899	60611	Mm.87142	NM_021899	ENSMUSG00000003154	Foxj2	Fhx	forkhead box J2	protein-coding
ALL_peak_117644	NO	YES	chr9	61947179	61947486	chr9.61947179	+	9.30394	NA	promoter-TSS (NM_024245)	promoter-TSS (NM_024245)	-533	NM_024245	71819	Mm.259374	NM_024245	ENSMUSG00000032254	Kif23	3110001D19Rik|C87313|CHO1|Knsl5|MKLP-1|MKLP1	kinesin family member 23	protein-coding
ALL_peak_99712	NO	YES	chr6	125067448	125067748	chr6.125067448	+	9.30394	NA	promoter-TSS (NM_001163269)	promoter-TSS (NM_001163269)	-322	NM_001163269	381810	Mm.333386	NM_001163268	ENSMUSG00000067714	Lpar5	GPR93|Gm1072|Gpr92|LPA5	lysophosphatidic acid receptor 5	protein-coding
ALL_peak_28236	NO	YES	chr12	116584940	116585165	chr12.116584940	+	9.30394	NA	intron (NM_011215, intron 2 of 22)	(GA)n|Simple_repeat|Simple_repeat	99332	NM_011215	19276	Mm.206054	NM_011215	ENSMUSG00000056553	Ptprn2	4930425H11Rik|IA2beta|PTP-NP|Phol|mKIAA0387|phogrin	protein tyrosine phosphatase, receptor type, N polypeptide 2	protein-coding
ALL_peak_3884	NO	YES	chr1	84881752	84881982	chr1.84881752	+	9.30394	NA	intron (NM_025386, intron 2 of 3)	GA-rich|Low_complexity|Low_complexity	42026	NM_025386	66153	Mm.381192	NM_025386	ENSMUSG00000073633	Fbxo36	0610008D19Rik|1110020F21Rik|2410002G19Rik|D1Ertd757e	F-box protein 36	protein-coding
ALL_peak_21071	NO	YES	chr11	98763101	98763359	chr11.98763101	+	9.30394	NA	intron (NM_001313983, intron 7 of 9)	(CA)n|Simple_repeat|Simple_repeat	12147	NM_145434	217166	Mm.390397	NM_145434	ENSMUSG00000020889	Nr1d1	A530070C09Rik|R75201	nuclear receptor subfamily 1, group D, member 1	protein-coding
ALL_peak_23221	NO	YES	chr12	16731515	16731760	chr12.16731515	+	9.30394	NA	intron (NM_001252071, intron 4 of 32)	(CA)n|Simple_repeat|Simple_repeat	25602	NM_001252071	268527	Mm.428062	NM_015764	ENSMUSG00000036523	Greb1	5730583K22Rik|9130004E13|AF180470|AU023194|mKIAA0575	gene regulated by estrogen in breast cancer protein	protein-coding
ALL_peak_17202	NO	YES	chr11	23052530	23053066	chr11.23052530	+	9.30394	NA	Intergenic	Intergenic	39411	NM_028672	73873	Mm.252406	NM_028672	ENSMUSG00000049811	Fam161a	4930430E16Rik	family with sequence similarity 161, member A	protein-coding
ALL_peak_26559	NO	YES	chr12	84847045	84847340	chr12.84847045	+	9.30394	NA	intron (NM_013589, intron 3 of 34)	(TG)n|Simple_repeat|Simple_repeat	-28610	NR_028577	100303738	Mm.479389	NR_028577		D030025P21Rik	-	RIKEN cDNA D030025P21 gene	ncRNA
ALL_peak_105870	NO	YES	chr7	101540111	101540420	chr7.101540111	+	9.30394	NA	Intergenic	(CA)n|Simple_repeat|Simple_repeat	15537	NM_007490	11871	Mm.439746	NM_007490	ENSMUSG00000092517	Art2a-ps	ARTC2|Art2a|Ly92a|Rt-6|Rt6|Rt6-1	ADP-ribosyltransferase 2a, pseudogene	protein-coding
ALL_peak_33509	NO	YES	chr13	111601683	111602518	chr13.111601683	+	9.30394	NA	Intergenic	(TG)n|Simple_repeat|Simple_repeat	-84078	NM_172593	218613	Mm.31012	NM_172593	ENSMUSG00000032727	Mier3	5730509D14|AU015422|D130064H19Rik	mesoderm induction early response 1, family member 3	protein-coding
ALL_peak_100934	NO	YES	chr6	145145152	145145422	chr6.145145152	+	9.30394	NA	intron (NM_001281980, intron 3 of 18)	(TG)n|Simple_repeat|Simple_repeat	23548	NM_008511	16970	Mm.843	NM_008511	ENSMUSG00000030263	Lrmp	D6Int3|D6Int4|D6Int5|D6Int7|D6Int8|Jaw1	lymphoid-restricted membrane protein	protein-coding
ALL_peak_117799	NO	YES	chr9	64671737	64672169	chr9.64671737	+	9.30394	NA	intron (NM_172522, intron 9 of 22)	C-rich|Low_complexity|Low_complexity	65803	NM_017382	53869	Mm.1387	NM_017382	ENSMUSG00000004771	Rab11a	-	RAB11A, member RAS oncogene family	protein-coding
ALL_peak_13399	NO	YES	chr10	77204001	77204270	chr10.77204001	+	9.30394	NA	Intergenic	(TG)n|Simple_repeat|Simple_repeat	-37605	NM_009929	12822	Mm.4352	NM_009929	ENSMUSG00000001435	Col18a1	-	collagen, type XVIII, alpha 1	protein-coding
ALL_peak_73082	NO	YES	chr3	58691011	58691388	chr3.58691011	+	9.30394	NA	intron (NM_009174, intron 1 of 1)	(GA)n|Simple_repeat|Simple_repeat	1189	NM_009174	20439	Mm.2847	NM_009174	ENSMUSG00000036432	Siah2	AA415433|Sinh2	seven in absentia 2	protein-coding
ALL_peak_82639	NO	YES	chr4	97486015	97486289	chr4.97486015	+	9.30394	NA	Intergenic	(CA)n|Simple_repeat|Simple_repeat	-95791	NM_001122952	18027	Mm.31274	NM_010905	ENSMUSG00000028565	Nfia	1110047K16Rik|9430022M17Rik|CTF|NF1-A|NF1A	nuclear factor I/A	protein-coding
ALL_peak_61304	NO	YES	chr19	55232503	55233079	chr19.55232503	+	9.30394	NA	intron (NM_001081076, intron 4 of 20)	(TG)n|Simple_repeat|Simple_repeat	8445	NM_001081076	73707	Mm.489987	NM_001081076	ENSMUSG00000055523	Gucy2g	2410077I05Rik|GC-G	guanylate cyclase 2g	protein-coding
ALL_peak_97679	NO	YES	chr6	84882301	84882790	chr6.84882301	+	9.30394	NA	intron (NM_177077, intron 8 of 21)	B4A|SINE|B4	186968	NM_177077	75914	Mm.159621	NM_177077	ENSMUSG00000033769	Exoc6b	4930569O18Rik|G430127E12Rik|Sec15b|Sec15l2|mKIAA0919	exocyst complex component 6B	protein-coding
ALL_peak_50107	NO	YES	chr17	12675871	12676139	chr17.12675871	+	9.30394	NA	promoter-TSS (NM_009202)	promoter-TSS (NM_009202)	-167	NM_009202	20517	Mm.594	NM_009202	ENSMUSG00000023829	Slc22a1	Lx1|Oct1|Orct|Orct1	solute carrier family 22 (organic cation transporter), member 1	protein-coding
ALL_peak_9687	NO	YES	chr1	195016917	195017309	chr1.195016917	+	9.30394	NA	promoter-TSS (NR_015566)	promoter-TSS (NR_015566)	-286	NR_015566	320977	Mm.99905	NR_015566	ENSMUSG00000096929	A330023F24Rik	C030002C11Rik	RIKEN cDNA A330023F24 gene	ncRNA
ALL_peak_39640	NO	YES	chr14	118688609	118688900	chr14.118688609	+	9.30394	NA	intron (NM_001163676, intron 1 of 29)	(CA)n|Simple_repeat|Simple_repeat	-11823	NM_001163675	239273	Mm.40537	NM_001033336	ENSMUSG00000032849	Abcc4	D630049P08Rik|MOATB|MRP4	ATP-binding cassette, sub-family C (CFTR/MRP), member 4	protein-coding
ALL_peak_14980	NO	YES	chr10	106775286	106775624	chr10.106775286	+	9.30394	NA	intron (NM_001205341, intron 6 of 31)	(CA)n|Simple_repeat|Simple_repeat	-172975	NR_131026	75833	Mm.159596	NR_131026		4930532I03Rik	-	RIKEN cDNA 4930532I03 gene	ncRNA
ALL_peak_112445	NO	YES	chr8	86254970	86255204	chr8.86254970	+	9.30394	NA	Intergenic	(CA)n|Simple_repeat|Simple_repeat	311503	NM_172912	244562	Mm.67485	NM_172912	ENSMUSG00000036872	Abcc12	4930467B22Rik|MRP9	ATP-binding cassette, sub-family C (CFTR/MRP), member 12	protein-coding
ALL_peak_85808	NO	YES	chr4	155563143	155563830	chr4.155563143	+	9.30394	NA	promoter-TSS (NM_001159637)	promoter-TSS (NM_001159637)	-329	NM_001159637	192185	Mm.28347	NM_138671	ENSMUSG00000029063	Nadk	4432404C02Rik|BC004012	NAD kinase	protein-coding
ALL_peak_106445	NO	YES	chr7	113172709	113173278	chr7.113172709	+	9.30394	NA	Intergenic	(CA)n|Simple_repeat|Simple_repeat	-30978	NR_045978	75239	Mm.381688	NR_045978		4930543E12Rik	4930545H14Rik	RIKEN cDNA 4930543E12 gene	ncRNA
ALL_peak_57339	NO	YES	chr18	64682891	64683306	chr18.64682891	+	9.30394	NA	Intergenic	(CA)n|Simple_repeat|Simple_repeat	-22098	NM_001001488	54670	Mm.270043	NM_001001488	ENSMUSG00000039529	Atp8b1	AI451886|FIC1|Ic	ATPase, class I, type 8B, member 1	protein-coding
ALL_peak_119473	NO	YES	chr9	96782481	96782765	chr9.96782481	+	9.30394	NA	Intergenic	(CA)n|Simple_repeat|Simple_repeat	17061	NR_102296	319707	Mm.392191	NR_102293	ENSMUSG00000101581	C430002N11Rik	-	RIKEN cDNA C430002N11 gene	ncRNA
ALL_peak_1517	NO	YES	chr1	36083753	36084021	chr1.36083753	+	9.25016	NA	intron (NM_015818, intron 1 of 1)	(TG)n|Simple_repeat|Simple_repeat	15487	NM_015818	50785	Mm.213566	NM_015818	ENSMUSG00000045216	Hs6st1	6Ost1	heparan sulfate 6-O-sulfotransferase 1	protein-coding
ALL_peak_10480	NO	YES	chr10	17946832	17947146	chr10.17946832	+	9.25016	NA	intron (NM_001033432, intron 1 of 3)	(CA)n|Simple_repeat|Simple_repeat	1078	NM_001033432	380629	Mm.276430	NM_001033432	ENSMUSG00000039879	Heca	Gm869|HDC|HDCL	headcase homolog (Drosophila)	protein-coding
ALL_peak_92514	NO	YES	chr5	134931968	134932303	chr5.134931968	+	9.22923	NA	promoter-TSS (NM_024479)	promoter-TSS (NM_024479)	-238	NM_024479	79565	Mm.34235	NM_024479	ENSMUSG00000040557	Wbscr27	AW492986|BC002286	Williams Beuren syndrome chromosome region 27 (human)	protein-coding
ALL_peak_107622	NO	YES	chr7	135604631	135604894	chr7.135604631	+	9.20631	NA	intron (NM_001316680, intron 2 of 20)	(CA)n|Simple_repeat|Simple_repeat	-1066	NM_001316679	19267	Mm.945	NM_011212	ENSMUSG00000041836	Ptpre	PTPe|PTPepsilon|RPTPepsilon	protein tyrosine phosphatase, receptor type, E	protein-coding
ALL_peak_75921	NO	YES	chr3	116491666	116491947	chr3.116491666	+	9.20631	NA	intron (NM_025517, intron 10 of 10)	(TG)n|Simple_repeat|Simple_repeat	16369	NM_025517	66368	Mm.251228	NM_025517	ENSMUSG00000000339	Rtca	2310009A18Rik|AI450277|RPC|Rtcd1	RNA 3'-terminal phosphate cyclase	protein-coding
ALL_peak_21969	NO	YES	chr11	113134102	113134540	chr11.113134102	+	9.20631	NA	intron (NR_015556, intron 1 of 2)	(CA)n|Simple_repeat|Simple_repeat	67517	NR_015556	72386	Mm.266961	NR_015556	ENSMUSG00000087259	2610035D17Rik	-	RIKEN cDNA 2610035D17 gene	ncRNA
ALL_peak_30513	NO	YES	chr13	46930982	46931289	chr13.46930982	+	9.20631	NA	Intergenic	(TC)n|Simple_repeat|Simple_repeat	-1417	NM_010617	16553	Mm.342703	NM_010617	ENSMUSG00000021375	Kif13a	4930505I07Rik|mKIAA4109	kinesin family member 13A	protein-coding
ALL_peak_90082	NO	YES	chr5	91401959	91402379	chr5.91401959	+	9.20631	NA	intron (NM_007568, intron 1 of 5)	intron (NM_007568, intron 1 of 5)	825	NM_007568	12223	Mm.2024	NM_007568	ENSMUSG00000082361	Btc	Bcn	betacellulin, epidermal growth factor family member	protein-coding
ALL_peak_33756	NO	YES	chr13	116309085	116309364	chr13.116309085	+	9.20631	NA	intron (NM_021459, intron 1 of 5)	(CA)n|Simple_repeat|Simple_repeat	464	NM_021459	16392	Mm.42242	NM_021459	ENSMUSG00000042258	Isl1	-	ISL1 transcription factor, LIM/homeodomain	protein-coding
ALL_peak_2516	NO	YES	chr1	57475891	57476412	chr1.57475891	+	9.20631	NA	Intergenic	Intergenic	-69477	NM_001302962	68736	Mm.288490	NM_001037742		Tyw5	1110034B05Rik	tRNA-yW synthesizing protein 5	protein-coding
ALL_peak_63232	NO	YES	chr2	31663254	31663557	chr2.31663254	+	9.20631	NA	Intergenic	RLTR17B_Mm|LTR|ERVK	-7332	NM_144886	227715	Mm.150972	NM_144886	ENSMUSG00000039356	Exosc2	Rrp4	exosome component 2	protein-coding
ALL_peak_27820	NO	YES	chr12	108699330	108699636	chr12.108699330	+	9.20631	NA	intron (NM_001171002, intron 1 of 2)	(TG)n|Simple_repeat|Simple_repeat	2823	NM_001171002	70059	Mm.207605	NM_027299	ENSMUSG00000021263	Degs2	2210008A03Rik|AI852933|DES2	degenerative spermatocyte homolog 2 (Drosophila), lipid desaturase	protein-coding
ALL_peak_120910	NO	YES	chr9	120770821	120771095	chr9.120770821	+	9.20631	NA	Intergenic	(TG)n|Simple_repeat|Simple_repeat	144292	NR_040742	76402	Mm.436588	NR_040742	ENSMUSG00000100146	1700020M21Rik	-	RIKEN cDNA 1700020M21 gene	ncRNA
ALL_peak_81007	NO	YES	chr4	62654480	62654743	chr4.62654480	+	9.20631	NA	intron (NM_134257, intron 10 of 15)	(TG)n|Simple_repeat|Simple_repeat	-19363	NM_001310706	50780	Mm.286753	NM_019492	ENSMUSG00000059810	Rgs3	4930506N09Rik|C2PA-RGS3|C2pa|PDZ-RGS3|RGS3S	regulator of G-protein signaling 3	protein-coding
ALL_peak_4523	NO	YES	chr1	97660450	97660790	chr1.97660450	+	9.20631	NA	intron (NM_133825, intron 1 of 2)	(GA)n|Simple_repeat|Simple_repeat	1398	NM_133825	52392	Mm.12309	NM_133825	ENSMUSG00000044768	D1Ertd622e	AI987691|AW047450	DNA segment, Chr 1, ERATO Doi 622, expressed	protein-coding
ALL_peak_65674	NO	YES	chr2	84455089	84455405	chr2.84455089	+	9.18333	NA	intron (NM_011576, intron 3 of 8)	(TG)n|Simple_repeat|Simple_repeat	18927	NM_011576	21788	Mm.124316	NM_011576	ENSMUSG00000027082	Tfpi	A630013F22Rik|AW552122|EPI|LACI	tissue factor pathway inhibitor	protein-coding
ALL_peak_77620	NO	YES	chr3	148989243	148989553	chr3.148989243	+	9.17141	NA	Intergenic	CpG	-34763	NM_001081298	99633	Mm.9776	NM_001081298	ENSMUSG00000028184	Adgrl2	AI450192|CIRL-2|Gm619|Lec1|Lphh1|Lphn2|mKIAA0786	adhesion G protein-coupled receptor L2	protein-coding
ALL_peak_101700	NO	YES	chr7	16310697	16311409	chr7.16310697	+	9.17141	NA	intron (NM_133234, intron 1 of 3)	(TG)n|Simple_repeat|Simple_repeat	1470	NM_133234	170770	Mm.7660	NM_133234	ENSMUSG00000002083	Bbc3	PUMA|PUMA/JFY1	BCL2 binding component 3	protein-coding
ALL_peak_100804	NO	YES	chr6	143480187	143480933	chr6.143480187	+	9.16767	NA	Intergenic	(TG)n|Simple_repeat|Simple_repeat	170728	NR_045732	73425	Mm.417844	NR_045732	ENSMUSG00000086887	1700060C16Rik	-	RIKEN cDNA 1700060C16 gene	ncRNA
ALL_peak_59584	NO	YES	chr19	23273951	23274226	chr19.23273951	+	9.0841	NA	promoter-TSS (NM_153808)	promoter-TSS (NM_153808)	-191	NM_153808	226026	Mm.23267	NM_153808	ENSMUSG00000024943	Smc5	MLZ-453|SMC-5|Smc5l1|mKIAA0594|mSMC5	structural maintenance of chromosomes 5	protein-coding
ALL_peak_99841	NO	YES	chr6	127334396	127334721	chr6.127334396	+	9.0841	NA	Intergenic	(CA)n|Simple_repeat|Simple_repeat	-26591	NR_073373	232386	Mm.257367	NR_073373	ENSMUSG00000107153	Gm38404	D130058E03	predicted gene, 38404	ncRNA
ALL_peak_104801	NO	YES	chr7	79302458	79302740	chr7.79302458	+	9.0841	NA	intron (NM_018811, intron 3 of 10)	intron (NM_018811, intron 3 of 10)	29333	NM_018811	54608	Mm.365490	NM_018811		Abhd2	2210009N18Rik|LABH2|Labh-2	abhydrolase domain containing 2	protein-coding
ALL_peak_88668	NO	YES	chr5	64750831	64751168	chr5.64750831	+	9.0841	NA	Intergenic	(CA)n|Simple_repeat|Simple_repeat	-52524	NM_008453	16599	Mm.392759	NM_008453	ENSMUSG00000029178	Klf3	9930027G08Rik|AL024007|Bklf|Tef-2	Kruppel-like factor 3 (basic)	protein-coding
ALL_peak_14559	NO	YES	chr10	98829867	98830371	chr10.98829867	+	9.08327	NA	Intergenic	(CA)n|Simple_repeat|Simple_repeat	-85033	NM_026482	67972	Mm.166944	NM_026482	ENSMUSG00000019943	Atp2b1	2810442I22Rik|E130111D10Rik|Pmca1	ATPase, Ca++ transporting, plasma membrane 1	protein-coding
ALL_peak_26132	NO	YES	chr12	76578706	76578992	chr12.76578706	+	8.98675	NA	3' UTR (NM_153804, exon 19 of 19)	3' UTR (NM_153804, exon 19 of 19)	-30924	NR_046044	100504549	Mm.440349	NR_046044		AI463170	-	expressed sequence AI463170	ncRNA
ALL_peak_48440	NO	YES	chr16	76859544	76859865	chr16.76859544	+	8.98675	NA	Intergenic	(TG)n|Simple_repeat|Simple_repeat	151177	NR_040573	76601	Mm.396217	NR_040573	ENSMUSG00000100857	1700041M19Rik	-	RIKEN cDNA 1700041M19 gene	ncRNA
ALL_peak_64492	NO	YES	chr2	60210342	60210673	chr2.60210342	+	8.98675	NA	intron (NM_020575, intron 1 of 9)	(CA)n|Simple_repeat|Simple_repeat	571	NM_020575	57438	Mm.260635	NM_020575	ENSMUSG00000026977	2007-03-01	Axo|Axot|Gtrgeo17	membrane-associated ring finger (C3HC4) 7	protein-coding
ALL_peak_99885	NO	YES	chr6	128225742	128226011	chr6.128225742	+	8.98675	NA	Intergenic	(CA)n|Simple_repeat|Simple_repeat	-42073	NR_077223	330427	Mm.426356	NR_077223	ENSMUSG00000107879	9330102E08Rik	-	RIKEN cDNA 9330102E08 gene	ncRNA
ALL_peak_9921	NO	YES	chr10	6825196	6825525	chr10.6825196	+	8.98675	NA	intron (NM_001304950, intron 1 of 4)	(TG)n|Simple_repeat|Simple_repeat	36784	NM_001039652	18390	Mm.438000	NM_011013	ENSMUSG00000000766	Oprm1	M-OR-1|MOP-R|MOR-1|MOR-1O|Oprm|mor|muOR	opioid receptor, mu 1	protein-coding
ALL_peak_60880	NO	YES	chr19	47491563	47491858	chr19.47491563	+	8.98675	NA	Intergenic	(CA)n|Simple_repeat|Simple_repeat	-21272	NR_045322	100503104	Mm.442735	NR_045322	ENSMUSG00000097990	Gm19557	-	predicted gene, 19557	ncRNA
ALL_peak_22775	NO	YES	chr12	8865440	8865764	chr12.8865440	+	8.98522	NA	Intergenic	(CA)n|Simple_repeat|Simple_repeat	-55705	NM_008640	17775	Mm.30071	NM_008640	ENSMUSG00000020585	Laptm4a	AA286466|LAPTM4|MTP|Mtrp|mKIAA0108	lysosomal-associated protein transmembrane 4A	protein-coding
ALL_peak_99529	NO	YES	chr6	121347010	121347364	chr6.121347010	+	8.97166	NA	intron (NM_133661, intron 1 of 14)	(TG)n|Simple_repeat|Simple_repeat	490	NM_133661	14411	Mm.274506	NM_133661	ENSMUSG00000030109	Slc6a12	BGT1|GAT2|Gabt2	solute carrier family 6 (neurotransmitter transporter, betaine/GABA), member 12	protein-coding
ALL_peak_21160	NO	YES	chr11	100147317	100147714	chr11.100147317	+	8.97166	NA	Intergenic	RLTR17B_Mm|LTR|ERVK	-1589	NM_008471	16669	Mm.439699	NM_008471	ENSMUSG00000020911	Krt19	AI663979|CK-19|EndoC|K19|Krt-1.19|Krt1-19	keratin 19	protein-coding
ALL_peak_15491	NO	YES	chr10	116789390	116789863	chr10.116789390	+	8.97166	NA	intron (NM_001033333, intron 19 of 24)	IMPB_01|Satellite|Satellite	60373	NR_131036	75878	Mm.370607	NR_131036		4930579P08Rik	-	RIKEN cDNA 4930579P08 gene	ncRNA
ALL_peak_37425	NO	YES	chr14	73446213	73447329	chr14.73446213	+	8.97166	NA	Intergenic	IMPB_01|Satellite|Satellite	-61500	NM_008410	16432	Mm.4266	NM_008410	ENSMUSG00000022108	Itm2b	AI256040|Bri|Bri2|Bricd2b|D14Sel6|E25BMM|imBRI2	integral membrane protein 2B	protein-coding
ALL_peak_46191	NO	YES	chr16	30472186	30472435	chr16.30472186	+	8.97166	NA	Intergenic	Intergenic	78268	NM_172614	224090	Mm.241459	NM_172614		Tmem44	1700007N03Rik|9330161C17Rik|B230220N21	transmembrane protein 44	protein-coding
ALL_peak_49496	NO	YES	chr16	95769828	95770313	chr16.95769828	+	8.97166	NA	Intergenic	(CA)n|Simple_repeat|Simple_repeat	67663	NM_011809	23872	Mm.290207	NM_011809	ENSMUSG00000022895	Ets2	AU022856|Ets-2	E26 avian leukemia oncogene 2, 3' domain	protein-coding
ALL_peak_77351	NO	YES	chr3	144446271	144446533	chr3.144446271	+	8.97166	NA	intron (NM_011828, intron 4 of 6)	RSINE1|SINE|B4	123814	NM_011828	23908	Mm.12863	NM_011828		Hs2st1	AW214369|Hs2st|mKIAA0448	heparan sulfate 2-O-sulfotransferase 1	protein-coding
ALL_peak_114330	NO	YES	chr8	120544349	120544618	chr8.120544349	+	8.97166	NA	intron (NM_001145896, intron 1 of 15)	(GA)n|Simple_repeat|Simple_repeat	5787	NR_106159	102466849		NR_106159	ENSMUSG00000098280	Mir7687	Gm27573|mmu-mir-7687	microRNA 7687	ncRNA
ALL_peak_10502	NO	YES	chr10	18470070	18470351	chr10.18470070	+	8.97166	NA	intron (NM_001163592, intron 1 of 7)	(TG)n|Simple_repeat|Simple_repeat	229	NM_001163592	215819	Mm.297971	NM_173390	ENSMUSG00000039835	Nhsl1	5730409E15Rik|A630035H13Rik|A730096F01|BC013565|D10Bwg0940e|mKIAA1357	NHS-like 1	protein-coding
ALL_peak_100243	NO	YES	chr6	135368941	135369506	chr6.135368941	+	8.97166	NA	intron (NM_001288627, intron 1 of 4)	RLTR20C1_MM|LTR|ERVK	1730	NM_001288627	13730	Mm.182785	NM_010128	ENSMUSG00000030208	Emp1	I-8-09|TMP	epithelial membrane protein 1	protein-coding
ALL_peak_97865	NO	YES	chr6	88392120	88392384	chr6.88392120	+	8.97166	NA	intron (NM_023060, intron 1 of 6)	(TG)n|Simple_repeat|Simple_repeat	54287	NM_023060	65967	Mm.333237	NM_023060	ENSMUSG00000033216	Eefsec	Selb|sec	eukaryotic elongation factor, selenocysteine-tRNA-specific	protein-coding
ALL_peak_113422	NO	YES	chr8	105749402	105750341	chr8.105749402	+	8.97166	NA	intron (NM_027469, intron 1 of 2)	intron (NM_027469, intron 1 of 2)	8736	NM_027469	70575	Mm.40954	NM_027469		Gfod2	5730466C23Rik	glucose-fructose oxidoreductase domain containing 2	protein-coding
ALL_peak_51722	NO	YES	chr17	45799294	45799607	chr17.45799294	+	8.97166	NA	Intergenic	(CA)n|Simple_repeat|Simple_repeat	-65606	NM_028164	72240	Mm.482897	NM_028164	ENSMUSG00000094690	1600014C23Rik	-	RIKEN cDNA 1600014C23 gene	protein-coding
ALL_peak_21363	NO	YES	chr11	103335293	103335537	chr11.103335293	+	8.97166	NA	intron (NM_133715, intron 8 of 15)	(TG)n|Simple_repeat|Simple_repeat	9287	NM_133715	544817	Mm.259113	NM_133715	ENSMUSG00000034255	Arhgap27	2310069I04Rik|5730442P18Rik|Gm21552|Sh3d20	Rho GTPase activating protein 27	protein-coding
ALL_peak_71685	NO	YES	chr3	30013318	30013693	chr3.30013318	+	8.97166	NA	promoter-TSS (NM_007963)	promoter-TSS (NM_007963)	-301	NM_007963	14013	Mm.56965	NM_007963	ENSMUSG00000027684	Mecom	D630039M04Rik|Evi-1|Evi1|Jbo|Mds|Mds1|Mds1-Evi1|Prdm3|Znfpr1b1	MDS1 and EVI1 complex locus	protein-coding
ALL_peak_55902	NO	YES	chr18	36687265	36687521	chr18.36687265	+	8.97166	NA	intron (NM_172831, intron 9 of 12)	(CA)n|Simple_repeat|Simple_repeat	-8027	NM_146085	225372	Mm.89673	NM_146085	ENSMUSG00000006050	Apbb3	Fe65l2|Rirl2|TR2S	amyloid beta (A4) precursor protein-binding, family B, member 3	protein-coding
ALL_peak_18541	NO	YES	chr11	52132556	52132896	chr11.52132556	+	8.97166	NA	Intergenic	(TG)n|Simple_repeat|Simple_repeat	5980	NR_037221	100526467		NR_037221	ENSMUSG00000092870	Mir3061	mir-3061|mmu-mir-3061	microRNA 3061	ncRNA
ALL_peak_30216	NO	YES	chr13	41662675	41663309	chr13.41662675	+	8.97166	NA	Intergenic	Intergenic	12230	NM_001145878	328231	Mm.227476	NM_177808		Gm5082	A030008J09|EG328231	predicted gene 5082	protein-coding
ALL_peak_43894	NO	YES	chr15	86035857	86036088	chr15.86035857	+	8.97166	NA	Intergenic	(CA)n|Simple_repeat|Simple_repeat	-2195	NM_009886	12614	Mm.22680	NM_009886	ENSMUSG00000016028	Celsr1	Adgrc1|Crsh|Scy|crash	cadherin, EGF LAG seven-pass G-type receptor 1 (flamingo homolog, Drosophila)	protein-coding
ALL_peak_6402	NO	YES	chr1	130524958	130525248	chr1.130524958	+	8.97166	NA	Intergenic	IMPB_01|Satellite|Satellite	-62363	NM_010016	13136	Mm.101591	NM_010016	ENSMUSG00000026399	Cd55	Daf|Daf-GPI|Daf1|GPI-DAF	CD55 molecule, decay accelerating factor for complement	protein-coding
ALL_peak_92178	NO	YES	chr5	130222965	130223226	chr5.130222965	+	8.97166	NA	intron (NM_027854, intron 1 of 6)	(TG)n|Simple_repeat|Simple_repeat	760	NM_027854	71667	Mm.258508	NM_027854	ENSMUSG00000053094	Tmem248	0610007L01Rik|A930023A16Rik|AW557951|G430067H08Rik	transmembrane protein 248	protein-coding
ALL_peak_7888	NO	YES	chr1	160792769	160793018	chr1.160792769	+	8.97166	NA	promoter-TSS (NM_013862)	promoter-TSS (NM_013862)	45	NM_013862	29809	Mm.25833	NM_013862	ENSMUSG00000026721	Rabgap1l	5830411O09Rik|8430421H08Rik|9630005B12Rik|AW049894|HHL|Hh1|mKIAA0471	RAB GTPase activating protein 1-like	protein-coding
ALL_peak_75500	NO	YES	chr3	107357510	107357781	chr3.107357510	+	8.97166	NA	Intergenic	(TG)n|Simple_repeat|Simple_repeat	-24356	NM_001045807	229700	Mm.27966	NM_001045807		Rbm15	C230088J01Rik|mKIAA1438	RNA binding motif protein 15	protein-coding
ALL_peak_21563	NO	YES	chr11	107256661	107256932	chr11.107256661	+	8.97166	NA	intron (NM_145823, intron 5 of 9)	(CA)n|Simple_repeat|Simple_repeat	-67415	NM_133702	68979	Mm.294617	NM_133702	ENSMUSG00000018433	Nol11	1500002M01Rik|AU015220|AU019874	nucleolar protein 11	protein-coding
ALL_peak_42259	NO	YES	chr15	53216701	53217028	chr15.53216701	+	8.97166	NA	intron (NM_010162, intron 1 of 10)	(CA)n|Simple_repeat|Simple_repeat	129319	NM_010162	14042	Mm.309395	NM_010162		Ext1	AA409028	exostoses (multiple) 1	protein-coding
ALL_peak_99465	NO	YES	chr6	120251197	120251485	chr6.120251197	+	8.97166	NA	intron (NM_198884, intron 1 of 19)	intron (NM_198884, intron 1 of 19)	43218	NM_198884	330406	Mm.321840	NM_198884	ENSMUSG00000041372	B4galnt3	AB114826|B4GalNAcT3|C330047A21	beta-1,4-N-acetyl-galactosaminyl transferase 3	protein-coding
ALL_peak_9086	NO	YES	chr1	184060644	184060883	chr1.184060644	+	8.97166	NA	intron (NM_022019, intron 2 of 3)	(CA)n|Simple_repeat|Simple_repeat	26302	NM_022019	63953	Mm.404024	NM_022019	ENSMUSG00000039384	Dusp10	2610306G15Rik|AI158871|MKP-5|MKP5	dual specificity phosphatase 10	protein-coding
ALL_peak_107772	NO	YES	chr7	139265372	139265681	chr7.139265372	+	8.97166	NA	intron (NM_001098636, intron 2 of 2)	(TC)n|Simple_repeat|Simple_repeat	17044	NM_001098636	101631	Mm.334300	NM_001033206	ENSMUSG00000060260	Pwwp2b	AI594893|D7Ertd517e|D930023J19Rik|Pwwp2	PWWP domain containing 2B	protein-coding
ALL_peak_117418	NO	YES	chr9	58124914	58125245	chr9.58124914	+	8.97166	NA	Intergenic	(TG)n|Simple_repeat|Simple_repeat	-4009	NM_001162475	20897	Mm.10801	NM_009291	ENSMUSG00000032327	Stra6	AI891933	stimulated by retinoic acid gene 6	protein-coding
ALL_peak_76939	NO	YES	chr3	135824625	135825034	chr3.135824625	+	8.97166	NA	promoter-TSS (NM_001135149)	promoter-TSS (NM_001135149)	-450	NM_026228	67547	Mm.30239	NM_026228	ENSMUSG00000053897	Slc39a8	4933419D20Rik|AA986696|BIGM103|ZIP-8|Zip8	solute carrier family 39 (metal ion transporter), member 8	protein-coding
ALL_peak_96976	NO	YES	chr6	72804026	72804283	chr6.72804026	+	8.97166	NA	Intergenic	(TG)n|Simple_repeat|Simple_repeat	-15109	NM_001079822	21415	Mm.440067	NM_009332	ENSMUSG00000055799	Tcf7l1	Tcf-3|Tcf3|bHLHb21	transcription factor 7 like 1 (T cell specific, HMG box)	protein-coding
ALL_peak_102299	NO	YES	chr7	27689101	27689373	chr7.27689101	+	8.97166	NA	promoter-TSS (NM_001112731)	promoter-TSS (NM_001112731)	-103	NM_001112731	112415	Mm.145362	NM_198417	ENSMUSG00000057093	C030039L03Rik	-	RIKEN cDNA C030039L03 gene	protein-coding
ALL_peak_74921	NO	YES	chr3	96501471	96501705	chr3.96501471	+	8.97166	NA	Intergenic	(CGTG)n|Simple_repeat|Simple_repeat	-23597	NM_027126	69585	Mm.171314	NM_027126	ENSMUSG00000038403	Hfe2	2310035L15Rik|5230400G09Rik|AI414844|AI789733|DL-M|HJV|Rgmc|hemojuvelin	hemochromatosis type 2 (juvenile) (human homolog)	protein-coding
ALL_peak_42605	NO	YES	chr15	59786916	59787195	chr15.59786916	+	8.88953	NA	Intergenic	(CA)n|Simple_repeat|Simple_repeat	7904	NR_045076	100503021	Mm.402924	NR_045076		Gm19510	-	predicted gene, 19510	ncRNA
ALL_peak_51873	NO	YES	chr17	47854010	47854498	chr17.47854010	+	8.87751	NA	Intergenic	Intergenic	-19563	NM_001109973	17240	Mm.329100	NM_010783	ENSMUSG00000032717	Mdfi	I-mf|I-mfa	MyoD family inhibitor	protein-coding
ALL_peak_28041	NO	YES	chr12	112849347	112849579	chr12.112849347	+	8.87751	NA	Intergenic	(CA)n|Simple_repeat|Simple_repeat	11453	NM_019925	56696	Mm.20455	NM_019925	ENSMUSG00000021298	Gpr132	G2a	G protein-coupled receptor 132	protein-coding
ALL_peak_100778	NO	YES	chr6	142989950	142990266	chr6.142989950	+	8.87751	NA	Intergenic	(TG)n|Simple_repeat|Simple_repeat	-25656	NM_011374	20449	Mm.260838	NM_011374	ENSMUSG00000030283	St8sia1	9330109E03Rik|GD3S|Sia-T|Siat8|Siat8a	ST8 alpha-N-acetyl-neuraminide alpha-2,8-sialyltransferase 1	protein-coding
ALL_peak_15699	NO	YES	chr10	120393205	120393445	chr10.120393205	+	8.87751	NA	TTS (NR_040626)	TTS (NR_040626)	3802	NR_040626	320626	Mm.446091	NR_040626	ENSMUSG00000090191	9230105E05Rik	-	RIKEN cDNA 9230105E05 gene	ncRNA
ALL_peak_2571	NO	YES	chr1	58761049	58761342	chr1.58761049	+	8.87751	NA	Intergenic	(CA)n|Simple_repeat|Simple_repeat	30643	NM_001293805	12633	Mm.336848	NM_009805	ENSMUSG00000026031	Cflar	2310024N18Rik|A430105C05Rik|CLARP|Cash|Casper|ENSMUSG00000072980|FLAME|FLAME-1|Flip|Gm9845|I-FLICE|MRIT|c-Flip	CASP8 and FADD-like apoptosis regulator	protein-coding
ALL_peak_14419	NO	YES	chr10	96685740	96686175	chr10.96685740	+	8.87751	NA	Intergenic	Intergenic	68956	NM_007569	12226	Mm.23811	NM_007569	ENSMUSG00000036478	Btg1	AI426953|AW546738	B cell translocation gene 1, anti-proliferative	protein-coding
ALL_peak_31269	NO	YES	chr13	63244022	63244353	chr13.63244022	+	8.87751	NA	intron (NM_001289924, intron 13 of 16)	(TG)n|Simple_repeat|Simple_repeat	4158	NR_110521	72061	Mm.188105	NM_028079	ENSMUSG00000021458	2010111I01Rik	2300006M17Rik|AP-O|Aopep|mir-23b|mir-24-1|mir-27b	RIKEN cDNA 2010111I01 gene	protein-coding
ALL_peak_105852	NO	YES	chr7	101323287	101323565	chr7.101323287	+	8.87751	NA	intron (NM_019990, intron 2 of 6)	(TG)n|Simple_repeat|Simple_repeat	2107	NM_019990	56018	Mm.28896	NM_019990	ENSMUSG00000030688	Stard10	AV048538|CGI-52|NY-C0-28|PC-TP2|PCTP2|Pctpl|Sdccag28|SdccagG28|TISP-81	START domain containing 10	protein-coding
ALL_peak_122241	NO	YES	chrX	99469892	99470150	chrX.99469892	+	8.87751	NA	intron (NM_001290555, intron 1 of 1)	(CG)n|Simple_repeat|Simple_repeat	714	NM_001083110	18744	Mm.8211	NM_008853	ENSMUSG00000034403	Pja1	praja-1	praja ring finger 1, E3 ubiquitin protein ligase	protein-coding
ALL_peak_112869	NO	YES	chr8	95142816	95143098	chr8.95142816	+	8.87751	NA	promoter-TSS (NM_001145831)	promoter-TSS (NM_001145831)	-417	NM_001145831	16582	Mm.378951	NM_010631	ENSMUSG00000031788	Kifc3	AI325457|BB123200	kinesin family member C3	protein-coding
ALL_peak_46970	NO	YES	chr16	46752467	46752747	chr16.46752467	+	8.87751	NA	Intergenic	(TC)n|Simple_repeat|Simple_repeat	-255640	NM_021497	58998	Mm.328072	NM_021495	ENSMUSG00000022656	Pvrl3	2610301B19Rik|3000002N23Rik|4921513D19Rik|AA407785|AU016832|AW538082|CD113	poliovirus receptor-related 3	protein-coding
ALL_peak_85737	NO	YES	chr4	154417234	154417782	chr4.154417234	+	8.85341	NA	intron (NM_001291029, intron 3 of 15)	(CA)n|Simple_repeat|Simple_repeat	-117613	NM_001112744	230972	Mm.38481	NM_001112744	ENSMUSG00000029032	Arhgef16	-	Rho guanine nucleotide exchange factor (GEF) 16	protein-coding
ALL_peak_14252	NO	YES	chr10	93757692	93758012	chr10.93757692	+	8.83774	NA	Intergenic	(TG)n|Simple_repeat|Simple_repeat	-73703	NM_001206851	327799	Mm.491598	NM_183199	ENSMUSG00000020020	Usp44	E430004F17Rik	ubiquitin specific peptidase 44	protein-coding
ALL_peak_12409	NO	YES	chr10	59908873	59909142	chr10.59908873	+	8.81768	NA	Intergenic	(CA)n|Simple_repeat|Simple_repeat	29416	NM_019965	56709	Mm.103610	NM_019965	ENSMUSG00000020109	Dnajb12	Dj10|mDj10	DnaJ (Hsp40) homolog, subfamily B, member 12	protein-coding
ALL_peak_1886	NO	YES	chr1	43306216	43306503	chr1.43306216	+	8.81768	NA	Intergenic	Intergenic	-109598	NM_001289533	14200	Mm.6799	NM_010212	ENSMUSG00000008136	Fhl2	FHL-2|SLIM-3|SLIM3	four and a half LIM domains 2	protein-coding
ALL_peak_18386	NO	YES	chr11	49128227	49128527	chr11.49128227	+	8.79107	NA	intron (NM_010999, intron 5 of 5)	(CA)n|Simple_repeat|Simple_repeat	-14620	NM_146337	258334	Mm.390388	NM_146337	ENSMUSG00000047511	Olfr1396	MOR276-2	olfactory receptor 1396	protein-coding
ALL_peak_74663	NO	YES	chr3	90587636	90587895	chr3.90587636	+	8.79107	NA	Intergenic	(CA)n|Simple_repeat|Simple_repeat	-2482	NM_001195760	628324	Mm.33816	NM_001195760	ENSMUSG00000094018	S100a2	CaN19|EG628324|S100L	S100 calcium binding protein A2	protein-coding
ALL_peak_109107	NO	YES	chr8	24490141	24490421	chr8.24490141	+	8.79107	NA	Intergenic	(CA)n|Simple_repeat|Simple_repeat	-5295	NR_035483	100316707		NR_035483	ENSMUSG00000088552	Mir1957a	Mir1957|mmu-mir-1957|mmu-mir-1957a	microRNA 1957a	ncRNA
ALL_peak_43536	NO	YES	chr15	78581028	78581254	chr15.78581028	+	8.75886	NA	Intergenic	(CA)n|Simple_repeat|Simple_repeat	-8358	NM_009008	19354	Mm.1972	NM_009008	ENSMUSG00000033220	Rac2	AI323801|AI452260	RAS-related C3 botulinum substrate 2	protein-coding
ALL_peak_18427	NO	YES	chr11	49994869	49995251	chr11.49994869	+	8.72158	NA	Intergenic	Intergenic	-30271	NM_001290749	59044	Mm.359004	NM_021540	ENSMUSG00000020376	Rnf130	2510042A13Rik|G1RZFP|G1rp|GOLIATH|GP	ring finger protein 130	protein-coding
ALL_peak_33445	NO	YES	chr13	110723721	110724076	chr13.110723721	+	8.72158	NA	Intergenic	(TG)n|Simple_repeat|Simple_repeat	-179601	NR_131193	75139	Mm.490931	NR_131193		Gm38397	-	predicted gene, 38397	ncRNA
ALL_peak_19868	NO	YES	chr11	78377702	78377936	chr11.78377702	+	8.70389	NA	intron (NM_001277290, intron 1 of 8)	(CA)n|Simple_repeat|Simple_repeat	8789	NM_001277290	15218	Mm.4496	NM_008238	ENSMUSG00000002057	Foxn1	D11Bhm185e|Fkh19|HFH-11|Hfh11|Whn|nu|nude	forkhead box N1	protein-coding
ALL_peak_114329	NO	YES	chr8	120538799	120539052	chr8.120538799	+	8.67686	NA	TTS (NR_106159)	TTS (NR_106159)	229	NR_106159	102466849		NR_106159	ENSMUSG00000098280	Mir7687	Gm27573|mmu-mir-7687	microRNA 7687	ncRNA
ALL_peak_69964	NO	YES	chr2	170253597	170253873	chr2.170253597	+	8.67686	NA	Intergenic	(CA)n|Simple_repeat|Simple_repeat	-102626	NR_040610	73303	Mm.443297	NR_040610	ENSMUSG00000086999	Bcas1os2	1700040N02Rik	breast carcinoma amplified sequence 1, opposite strand 2	ncRNA
ALL_peak_91914	NO	YES	chr5	125134647	125134952	chr5.125134647	+	8.67686	NA	intron (NM_011424, intron 1 of 46)	(CA)n|Simple_repeat|Simple_repeat	44415	NM_011424	20602	Mm.278646	NM_011424	ENSMUSG00000029478	Ncor2	N-CoR|SMRT|SMRTe	nuclear receptor co-repressor 2	protein-coding
ALL_peak_21072	NO	YES	chr11	98766357	98766543	chr11.98766357	+	8.67686	NA	intron (NM_001313983, intron 9 of 9)	intron (NM_001313983, intron 9 of 9)	8927	NM_145434	217166	Mm.390397	NM_145434	ENSMUSG00000020889	Nr1d1	A530070C09Rik|R75201	nuclear receptor subfamily 1, group D, member 1	protein-coding
ALL_peak_82660	NO	YES	chr4	98106182	98106439	chr4.98106182	+	8.67686	NA	intron (NM_010905, intron 10 of 10)	(CA)n|Simple_repeat|Simple_repeat	276955	NM_053157	94043	Mm.331719	NM_053157	ENSMUSG00000028563	Tm2d1	2310026L18Rik|AA990549|Bbp	TM2 domain containing 1	protein-coding
ALL_peak_13546	NO	YES	chr10	80368128	80368769	chr10.80368128	+	8.66445	NA	intron (NR_038088, intron 1 of 4)	(TCC)n|Simple_repeat|Simple_repeat	1189	NR_038088	100568459		NR_038088		Bc1	Gm24367	brain cytoplasmic RNA 1	ncRNA
ALL_peak_117362	NO	YES	chr9	56901423	56901670	chr9.56901423	+	8.63938	NA	Intergenic	Intergenic	26825	NM_175483	235406	Mm.191459	NM_175483	ENSMUSG00000032733	Snx33	E130307J07Rik|Sh3px3	sorting nexin 33	protein-coding
ALL_peak_112360	NO	YES	chr8	84770564	84770824	chr8.84770564	+	8.63938	NA	intron (NM_001081982, intron 2 of 9)	(CA)n|Simple_repeat|Simple_repeat	3675	NM_001081981	18032	Mm.9394	NM_010906	ENSMUSG00000001911	Nfix	CTF|NF-I/X|NF1-X|NFI-X	nuclear factor I/X	protein-coding
ALL_peak_19723	NO	YES	chr11	75470975	75471295	chr11.75470975	+	8.63938	NA	TTS (NM_027249)	TTS (NM_027249)	3085	NM_027249	380712	Mm.41393	NM_027249	ENSMUSG00000038217	Tlcd2	-	TLC domain containing 2	protein-coding
ALL_peak_65952	NO	YES	chr2	91349292	91349556	chr2.91349292	+	8.63938	NA	intron (NM_001311144, intron 3 of 8)	(CA)n|Simple_repeat|Simple_repeat	84309	NM_001166024	77038	Mm.43636	NM_023854	ENSMUSG00000027255	Arfgap2	2310032E02Rik|Zfp289	ADP-ribosylation factor GTPase activating protein 2	protein-coding
ALL_peak_7510	NO	YES	chr1	153332931	153333311	chr1.153332931	+	8.63938	NA	promoter-TSS (NM_010683)	promoter-TSS (NM_010683)	-335	NM_010683	226519	Mm.1249	NM_010683	ENSMUSG00000026478	Lamc1	Lamb2	laminin, gamma 1	protein-coding
ALL_peak_51152	NO	YES	chr17	35001973	35002221	chr17.35001973	+	8.63938	NA	intron (NM_011690, intron 2 of 29)	(TG)n|Simple_repeat|Simple_repeat	1190	NM_011690	22321	Mm.28420	NM_011690	ENSMUSG00000007029	Vars	Bat6|D17H6S56E|G7a|Vars2	valyl-tRNA synthetase	protein-coding
ALL_peak_43416	NO	YES	chr15	76014326	76014585	chr15.76014326	+	8.63938	NA	promoter-TSS (NM_134087)	promoter-TSS (NM_134087)	-119	NM_134087	105732	Mm.267178	NM_134087	ENSMUSG00000046761	Fam83h	AA409316	family with sequence similarity 83, member H	protein-coding
ALL_peak_16310	NO	YES	chr11	3458925	3459173	chr11.3458925	+	8.63938	NA	TTS (NR_045276)	TTS (NR_045276)	3941	NR_037301	100499518		NR_037301	ENSMUSG00000095323	Mir3470a	mmu-mir-3470a	microRNA 3470a	ncRNA
ALL_peak_26695	NO	YES	chr12	86891194	86891469	chr12.86891194	+	8.63938	NA	Intergenic	(TG)n|Simple_repeat|Simple_repeat	-6517	NM_145836	238330	Mm.248358	NM_145836	ENSMUSG00000034168	Irf2bpl	6430527G18Rik|Eap1	interferon regulatory factor 2 binding protein-like	protein-coding
ALL_peak_54026	NO	YES	chr17	87550427	87550760	chr17.87550427	+	8.63938	NA	Intergenic	Intergenic	-85386	NM_008532	17075	Mm.4259	NM_008532	ENSMUSG00000045394	Epcam	CD326|EGP|EGP-2|Egp314|Ep-CAM|EpCAM1|GA733-2|Ly74|TROP1|Tacsd1|Tacstd1|gp40	epithelial cell adhesion molecule	protein-coding
ALL_peak_26701	NO	YES	chr12	86973966	86974211	chr12.86973966	+	8.63938	NA	Intergenic	(CA)n|Simple_repeat|Simple_repeat	14588	NM_001080943	238331	Mm.185890	NM_001080943	ENSMUSG00000048483	Zdhhc22	Gm262	zinc finger, DHHC-type containing 22	protein-coding
ALL_peak_117791	NO	YES	chr9	64520179	64520437	chr9.64520179	+	8.63938	NA	intron (NM_172522, intron 4 of 22)	(CA)n|Simple_repeat|Simple_repeat	134682	NM_001134399	214058	Mm.127721	NM_172522	ENSMUSG00000036466	Megf11	2410080H04Rik|D130061K05	multiple EGF-like-domains 11	protein-coding
ALL_peak_1577	NO	YES	chr1	37475497	37475758	chr1.37475497	+	8.63938	NA	intron (NM_001290801, intron 4 of 14)	(CA)n|Simple_repeat|Simple_repeat	12978	NR_024017	77633	Mm.483177	NR_024017	ENSMUSG00000103948	4930594C11Rik	-	G1 to S phase transition pseudogene	pseudo
ALL_peak_50730	NO	YES	chr17	27083035	27083325	chr17.27083035	+	8.63938	NA	intron (NM_080553, intron 2 of 57)	(TG)n|Simple_repeat|Simple_repeat	-8065	NR_106142	102465779		NR_106142	ENSMUSG00000098826	Mir7677	Gm27400|mmu-mir-7677	microRNA 7677	ncRNA
ALL_peak_83516	NO	YES	chr4	116749629	116749969	chr4.116749629	+	8.63938	NA	intron (NM_146151, intron 2 of 10)	(TG)n|Simple_repeat|Simple_repeat	28844	NM_146151	230661	Mm.482431	NM_146151	ENSMUSG00000033985	Tesk2	-	testis-specific kinase 2	protein-coding
ALL_peak_11460	NO	YES	chr10	39612568	39612859	chr10.39612568	+	8.63938	NA	promoter-TSS (NM_134000)	promoter-TSS (NM_134000)	-221	NM_134000	103213	Mm.436686	NM_134000	ENSMUSG00000019842	Traf3ip2	AI429613|Act1|CIKS	TRAF3 interacting protein 2	protein-coding
ALL_peak_71745	NO	YES	chr3	30977074	30977326	chr3.30977074	+	8.63938	NA	Intergenic	Intergenic	-7785	NM_153421	241915	Mm.233173	NM_153421	ENSMUSG00000037652	Phc3	E030046K01Rik|Edr3|Hph3	polyhomeotic-like 3 (Drosophila)	protein-coding
ALL_peak_78971	NO	YES	chr4	19728397	19728668	chr4.19728397	+	8.63938	NA	Intergenic	MT2A|LTR|ERVL	-19528	NM_001276292	107568	Mm.78312	NM_177327	ENSMUSG00000041058	Wwp1	8030445B08Rik|AIP5|SDRP1|Tiul1	WW domain containing E3 ubiquitin protein ligase 1	protein-coding
ALL_peak_77345	NO	YES	chr3	144307858	144308235	chr3.144307858	+	8.63938	NA	Intergenic	Intergenic	-102791	NM_010723	16911	Mm.29187	NM_010723	ENSMUSG00000028266	Lmo4	A730077C12Rik|Crp3|Etohi4	LIM domain only 4	protein-coding
ALL_peak_30451	NO	YES	chr13	45963310	45963649	chr13.45963310	+	8.63938	NA	intron (NM_009124, intron 1 of 7)	CpG	1512	NM_009124	20238	Mm.342683	NM_009124	ENSMUSG00000046876	Atxn1	2900016G23Rik|Atx1|C85907|ENSMUSG00000074917|Gm10786|Sca1	ataxin 1	protein-coding
ALL_peak_104137	NO	YES	chr7	66661902	66662222	chr7.66661902	+	8.63938	NA	intron (NM_080443, intron 4 of 5)	(CA)n|Simple_repeat|Simple_repeat	27499	NR_003961	117589	Mm.34785	NM_080443	ENSMUSG00000030509	Asb7	AI449039|Asb-7|D030055C23Rik	ankyrin repeat and SOCS box-containing 7	protein-coding
ALL_peak_88694	NO	YES	chr5	65086266	65086525	chr5.65086266	+	8.63938	NA	Intergenic	(CA)n|Simple_repeat|Simple_repeat	-44836	NM_175174	71778	Mm.10281	NM_175174	ENSMUSG00000054920	Klhl5	1300013C10Rik	kelch-like 5	protein-coding
ALL_peak_34775	NO	YES	chr14	20974151	20974497	chr14.20974151	+	8.63938	NA	intron (NM_009502, intron 2 of 20)	(CA)n|Simple_repeat|Simple_repeat	44891	NM_009502	22330	Mm.279361	NM_009502	ENSMUSG00000021823	Vcl	9430097D22|AA571387|AI462105|AW545629	vinculin	protein-coding
ALL_peak_71684	NO	YES	chr3	30005424	30005712	chr3.30005424	+	8.63938	NA	intron (NM_007963, intron 2 of 14)	(CA)n|Simple_repeat|Simple_repeat	7636	NM_007963	14013	Mm.56965	NM_007963	ENSMUSG00000027684	Mecom	D630039M04Rik|Evi-1|Evi1|Jbo|Mds|Mds1|Mds1-Evi1|Prdm3|Znfpr1b1	MDS1 and EVI1 complex locus	protein-coding
ALL_peak_17097	NO	YES	chr11	20531802	20532024	chr11.20531802	+	8.63938	NA	Intergenic	Intergenic	-11340	NM_021372	58172	Mm.339676	NM_021372	ENSMUSG00000049800	Sertad2	AB041541|AU021878|Kiaa0127|MNCb-1504|SEI-2|Sei2|TRIP-Br2|mKIAA0127	SERTA domain containing 2	protein-coding
ALL_peak_35673	NO	YES	chr14	40995272	40995572	chr14.40995272	+	8.63938	NA	intron (NM_027464, intron 5 of 5)	(CA)n|Simple_repeat|Simple_repeat	11498	NM_001316733	70564	Mm.27227	NM_027464	ENSMUSG00000021792	Fam213a	5730469M10Rik|AU040822|Pamm	family with sequence similarity 213, member A	protein-coding
ALL_peak_48984	NO	YES	chr16	87431657	87431960	chr16.87431657	+	8.63938	NA	intron (NM_001081068, intron 1 of 29)	intron (NM_001081068, intron 1 of 29)	798	NM_001081068	78913	Mm.249005	NM_001081068	ENSMUSG00000052299	Ltn1	4930528H02Rik|AV266914|C87237|Listerin|Rnf160|Zfp294	listerin E3 ubiquitin protein ligase 1	protein-coding
ALL_peak_88080	NO	YES	chr5	53103875	53104208	chr5.53103875	+	8.63938	NA	Intergenic	RMER17C2|LTR|ERVK	54688	NM_011402	20531	Mm.284891	NM_011402	ENSMUSG00000029188	Slc34a2	AA536683|D5Ertd227e|NaPi-2b|Npt2b	solute carrier family 34 (sodium phosphate), member 2	protein-coding
ALL_peak_83144	NO	YES	chr4	108887081	108887728	chr4.108887081	+	8.63938	NA	intron (NM_023537, intron 1 of 4)	(TTTC)n|Simple_repeat|Simple_repeat	8334	NM_023537	69908	Mm.41580	NM_023537	ENSMUSG00000003411	Rab3b	2610528C18Rik	RAB3B, member RAS oncogene family	protein-coding
ALL_peak_93163	NO	YES	chr5	144158208	144158726	chr5.144158208	+	8.63938	NA	intron (NM_001081109, intron 7 of 13)	B4|SINE|B4	-31819	NM_010800	17341	Mm.386767	NM_010800	ENSMUSG00000052271	Bhlha15	1810009C13Rik|Bhlhb8|MIST-1|Mist1	basic helix-loop-helix family, member a15	protein-coding
ALL_peak_53548	NO	YES	chr17	79663482	79664014	chr17.79663482	+	8.63938	NA	intron (NM_201361, intron 5 of 10)	intron (NM_201361, intron 5 of 10)	48848	NM_201361	381110	Mm.209801	NM_201361	ENSMUSG00000036368	Rmdn2	AW061290|Fam82a1|RMD-2|mRMD-2	regulator of microtubule dynamics 2	protein-coding
ALL_peak_116317	NO	YES	chr9	37365431	37365758	chr9.37365431	+	8.63938	NA	Intergenic	Intergenic	-2012	NM_175189	72927	Mm.266133	NM_175189	ENSMUSG00000046240	Hepacam	2900042E01Rik|Glialcam|Hepn1	hepatocyte cell adhesion molecule	protein-coding
ALL_peak_28000	NO	YES	chr12	112129766	112130001	chr12.112129766	+	8.63938	NA	promoter-TSS (NR_029590)	promoter-TSS (NR_029590)	-997	NR_029590	387199		NR_029590	ENSMUSG00000065574	Mir203	Mirn203|mir-203|mmu-mir-203	microRNA 203	ncRNA
ALL_peak_40605	NO	YES	chr15	15842323	15842573	chr15.15842323	+	8.63938	NA	Intergenic	Intergenic	-935653	NM_009869	12565	Mm.439758	NM_009869	ENSMUSG00000025370	Cdh9	-	cadherin 9	protein-coding
ALL_peak_74543	NO	YES	chr3	88442664	88443073	chr3.88442664	+	8.63938	NA	intron (NM_001163489, intron 10 of 14)	(CA)n|Simple_repeat|Simple_repeat	-1917	NR_105978	102465611		NR_105978	ENSMUSG00000098655	Mir7011	Gm27677|mmu-mir-7011	microRNA 7011	ncRNA
ALL_peak_14777	NO	YES	chr10	102512521	102512812	chr10.102512521	+	8.63938	NA	intron (NM_146240, intron 1 of 1)	intron (NM_146240, intron 1 of 1)	444	NM_146240	237504	Mm.282672	NM_146240	ENSMUSG00000044921	Rassf9	AW322107|Pamci	Ras association (RalGDS/AF-6) domain family (N-terminal) member 9	protein-coding
ALL_peak_46241	NO	YES	chr16	31362779	31363034	chr16.31362779	+	8.63938	NA	Intergenic	(CA)n|Simple_repeat|Simple_repeat	-48098	NM_001301353	11815	Mm.2082	NM_007470	ENSMUSG00000022548	Apod	-	apolipoprotein D	protein-coding
ALL_peak_11128	NO	YES	chr10	31609661	31609920	chr10.31609661	+	8.63938	NA	promoter-TSS (NM_001146349)	promoter-TSS (NM_001146349)	-65	NM_001146349	268291	Mm.295212	NM_001146349		Rnf217	AU016819|Ibrdc1	ring finger protein 217	protein-coding
ALL_peak_38659	NO	YES	chr14	99688240	99688494	chr14.99688240	+	8.63938	NA	Intergenic	(CA)n|Simple_repeat|Simple_repeat	389676	NM_009769	12224	Mm.30262	NM_009769	ENSMUSG00000005148	Klf5	4930520J07Rik|Bteb2|CKLF|IKLF	Kruppel-like factor 5	protein-coding
ALL_peak_44498	NO	YES	chr15	98510374	98510656	chr15.98510374	+	8.6168	NA	Intergenic	(CA)n|Simple_repeat|Simple_repeat	9319	NR_034051	100217417	Mm.486440	NR_034051	ENSMUSG00000065336	Snora34	MBI-89	small nucleolar RNA, H/ACA box 34	snoRNA
ALL_peak_98289	NO	YES	chr6	97707799	97708236	chr6.97707799	+	8.61557	NA	Intergenic	(CA)n|Simple_repeat|Simple_repeat	-90360	NM_145148	232288	Mm.27789	NM_145148	ENSMUSG00000030064	Frmd4b	6030440G05Rik|C87375|GOBLIN|GRSP1|R74720|mKIAA1013	FERM domain containing 4B	protein-coding
ALL_peak_74856	NO	YES	chr3	95028835	95029114	chr3.95028835	+	8.61557	NA	Intergenic	(CA)n|Simple_repeat|Simple_repeat	13640	NM_001282017	19185	Mm.2261	NM_008951	ENSMUSG00000005625	Psmd4	Af1|Mcb1|angiocidin	proteasome (prosome, macropain) 26S subunit, non-ATPase, 4	protein-coding
ALL_peak_43608	NO	YES	chr15	79931646	79931935	chr15.79931646	+	8.54871	NA	intron (NM_144811, intron 1 of 6)	(TG)n|Simple_repeat|Simple_repeat	856	NM_144811	52609	Mm.323442	NM_144811	ENSMUSG00000053411	Cbx7	1600014J01Rik|AI851678|D15Ertd417e	chromobox 7	protein-coding
ALL_peak_64462	NO	YES	chr2	59447508	59447740	chr2.59447508	+	8.54871	NA	Intergenic	(TG)n|Simple_repeat|Simple_repeat	-37029	NM_029723	76747	Mm.275769	NM_029723	ENSMUSG00000026989	Dapl1	2310032F03Rik|EEDA	death associated protein-like 1	protein-coding
ALL_peak_33586	NO	YES	chr13	112987538	112987752	chr13.112987538	+	8.54871	NA	promoter-TSS (NM_001081062)	promoter-TSS (NM_001081062)	-157	NM_001081062	218630	Mm.25457	NM_001081062	ENSMUSG00000042417	Ccno	C86987|Ccnu|E130318K11|Ung2	cyclin O	protein-coding
ALL_peak_74098	NO	YES	chr3	79489736	79490022	chr3.79489736	+	8.54871	NA	intron (NM_001162999, intron 10 of 16)	(CA)n|Simple_repeat|Simple_repeat	77800	NM_001162999	329679	Mm.244005	NM_001162999	ENSMUSG00000061175	Fnip2	D630023B12Rik|mKIAA1450	folliculin interacting protein 2	protein-coding
ALL_peak_117684	NO	YES	chr9	62647218	62647623	chr9.62647218	+	8.54871	NA	Intergenic	(TG)n|Simple_repeat|Simple_repeat	-30435	NM_176922	319480	Mm.34883	NM_176922	ENSMUSG00000032243	Itga11	4732459H24Rik	integrin alpha 11	protein-coding
ALL_peak_25979	NO	YES	chr12	73842647	73842904	chr12.73842647	+	8.54871	NA	Intergenic	(TC)n|Simple_repeat|Simple_repeat	-58549	NM_001313920	15251	Mm.3879	NM_010431	ENSMUSG00000021109	Hif1a	AA959795|HIF-1-alpha|HIF1-alpha|HIF1alpha|MOP1|bHLHe78	hypoxia inducible factor 1, alpha subunit	protein-coding
ALL_peak_52821	NO	YES	chr17	66537431	66537643	chr17.66537431	+	8.54871	NA	Intergenic	(CA)n|Simple_repeat|Simple_repeat	-17867	NM_024448	19328	Mm.248313	NM_024448	ENSMUSG00000023460	Rab12	2900054P15Rik|AW555448|C77700	RAB12, member RAS oncogene family	protein-coding
ALL_peak_23955	NO	YES	chr12	31060075	31060382	chr12.31060075	+	8.54871	NA	Intergenic	(TC)n|Simple_repeat|Simple_repeat	-13740	NM_027828	104943	Mm.248938	NM_027828	ENSMUSG00000036136	Fam110c	9030611O19Rik|AU019489	family with sequence similarity 110, member C	protein-coding
ALL_peak_87058	NO	YES	chr5	30647153	30647377	chr5.30647153	+	8.52738	NA	promoter-TSS (NR_049199)	promoter-TSS (NR_049199)	-671	NR_049199	100885838		NR_049199	ENSMUSG00000093710	Mir5625	Gm23930|mmu-mir-5625	microRNA 5625	ncRNA
ALL_peak_99891	NO	YES	chr6	128317997	128318234	chr6.128317997	+	8.49803	NA	Intergenic	(TG)n|Simple_repeat|Simple_repeat	-17302	NM_001080979	21679	Mm.14774	NM_011567	ENSMUSG00000030353	Tead4	ETFR-2|Etfr2|FR-19|Rtef1|TEAD-4|TEF-3|Tcf13r1|Tef3|Tefr|Tefr1|Tefr1a	TEA domain family member 4	protein-coding
ALL_peak_74370	NO	YES	chr3	84581756	84581990	chr3.84581756	+	8.49803	NA	intron (NM_001293801, intron 1 of 7)	(GA)n|Simple_repeat|Simple_repeat	752	NM_001081093	99889	Mm.316536	NM_001081093	ENSMUSG00000074513	Arfip1	2310030I10Rik|Arfaptin|D3Ertd598e	ADP-ribosylation factor interacting protein 1	protein-coding
ALL_peak_21094	NO	YES	chr11	99124073	99124357	chr11.99124073	+	8.49803	NA	Intergenic	(TG)n|Simple_repeat|Simple_repeat	30862	NM_007719	12775	Mm.2932	NM_007719	ENSMUSG00000037944	Ccr7	CC-CKR-7|CCR-7|CD197|Cdw197|Cmkbr7|EBI1|Ebi1h	chemokine (C-C motif) receptor 7	protein-coding
ALL_peak_44668	NO	YES	chr15	101327464	101327792	chr15.101327464	+	8.49803	NA	Intergenic	(TG)n|Simple_repeat|Simple_repeat	34416	NR_033803	77717	Mm.391998	NR_033803	ENSMUSG00000075408	6030408B16Rik	AI225877	RIKEN cDNA 6030408B16 gene	ncRNA
ALL_peak_53052	NO	YES	chr17	70832046	70832449	chr17.70832046	+	8.48327	NA	Intergenic	Intergenic	14530	NM_001164077	21815	Mm.101034	NM_009372	ENSMUSG00000047407	Tgif1	AA959811|AI462167|Tgif	TGFB-induced factor homeobox 1	protein-coding
ALL_peak_27499	NO	YES	chr12	103457306	103457710	chr12.103457306	+	8.47138	NA	promoter-TSS (NM_145449)	promoter-TSS (NM_145449)	-285	NM_145449	217845	Mm.298416	NM_145449	ENSMUSG00000021208	Ifi27l2b	1810023F06Rik|ISG12(b2)	interferon, alpha-inducible protein 27 like 2B	protein-coding
ALL_peak_113448	NO	YES	chr8	106308468	106308772	chr8.106308468	+	8.45729	NA	intron (NM_021491, intron 1 of 8)	(TG)n|Simple_repeat|Simple_repeat	26391	NR_126090	75044	Mm.445896	NR_126090		4930506A18Rik	-	RIKEN cDNA 4930506A18 gene	ncRNA
ALL_peak_61637	NO	YES	chr19	60873949	60874221	chr19.60873949	+	8.43952	NA	intron (NM_007452, intron 1 of 6)	intron (NM_007452, intron 1 of 6)	453	NM_007452	11757	Mm.29821	NM_007452	ENSMUSG00000024997	Prdx3	AW822249|Aop1|D0Tohi1|Ef2l|Mer5|Prx3|SP22|TDXM	peroxiredoxin 3	protein-coding
ALL_peak_31322	NO	YES	chr13	64335956	64336218	chr13.64335956	+	8.42383	NA	Intergenic	(TG)n|Simple_repeat|Simple_repeat	-23377	NM_025370	66129	Mm.491110	NM_025370	ENSMUSG00000021482	Aaed1	1110018J18Rik|AI849003	AhpC/TSA antioxidant enzyme domain containing 1	protein-coding
ALL_peak_85079	NO	YES	chr4	142015078	142015361	chr4.142015078	+	8.40072	NA	Intergenic	(TC)n|Simple_repeat|Simple_repeat	-2679	NR_131014	78917	Mm.139995	NR_131014		4930455G09Rik	-	RIKEN cDNA 4930455G09 gene	ncRNA
ALL_peak_59568	NO	YES	chr19	23033167	23033557	chr19.23033167	+	8.39585	NA	Intergenic	(TC)n|Simple_repeat|Simple_repeat	-107864	NM_010638	16601	Mm.291595	NM_010638	ENSMUSG00000033863	Klf9	2310051E17Rik|AA589643|BTEB-1|Bteb1|ENSMUSG00000055440|Gm9971	Kruppel-like factor 9	protein-coding
ALL_peak_19499	NO	YES	chr11	70352270	70352553	chr11.70352270	+	8.36697	NA	promoter-TSS (NM_009660)	promoter-TSS (NM_009660)	-380	NM_009660	11687	Mm.4584	NM_009660	ENSMUSG00000018924	Alox15	12-LO|12/15-LO|15-LOX|Alox12l|L-12LO	arachidonate 15-lipoxygenase	protein-coding
ALL_peak_75917	NO	YES	chr3	116474229	116474448	chr3.116474229	+	8.36697	NA	Intergenic	(TG)n|Simple_repeat|Simple_repeat	33837	NM_025517	66368	Mm.251228	NM_025517	ENSMUSG00000000339	Rtca	2310009A18Rik|AI450277|RPC|Rtcd1	RNA 3'-terminal phosphate cyclase	protein-coding
ALL_peak_85018	NO	YES	chr4	141303190	141303428	chr4.141303190	+	8.36697	NA	intron (NM_010139, intron 1 of 16)	(TG)n|Simple_repeat|Simple_repeat	2088	NM_010139	13836	Mm.2581	NM_010139	ENSMUSG00000006445	Epha2	AW545284|Eck|Myk2|Sek-2|Sek2	Eph receptor A2	protein-coding
ALL_peak_38787	NO	YES	chr14	101854416	101854736	chr14.101854416	+	8.36697	NA	intron (NM_201529, intron 4 of 30)	(TG)n|Simple_repeat|Simple_repeat	124648	NM_201529	380928	Mm.218981	NM_201529	ENSMUSG00000033060	Lmo7	C78582|FBXO20|Gm914|mKIAA0858	LIM domain only 7	protein-coding
ALL_peak_100157	NO	YES	chr6	134111908	134112160	chr6.134111908	+	8.36697	NA	intron (NM_001303102, intron 2 of 8)	(TG)n|Simple_repeat|Simple_repeat	76334	NM_007961	14011	Mm.269995	NM_007961	ENSMUSG00000030199	Etv6	AW123102|AW557856|Tel	ets variant 6	protein-coding
ALL_peak_120584	NO	YES	chr9	116193872	116194134	chr9.116193872	+	8.36697	NA	Intergenic	(CA)n|Simple_repeat|Simple_repeat	-18640	NM_009371	21813	Mm.172346	NM_009371	ENSMUSG00000032440	Tgfbr2	1110020H15Rik|AU042018|DNIIR|RIIDN|TBR-II|TbetaR-II|TbetaRII	transforming growth factor, beta receptor II	protein-coding
ALL_peak_74581	NO	YES	chr3	89160207	89160475	chr3.89160207	+	8.36697	NA	promoter-TSS (NM_008227)	promoter-TSS (NM_008227)	-184	NM_008227	15168	Mm.389461	NM_008227	ENSMUSG00000028051	Hcn3	BCNG-4|Bcng4|Hac3|Hcn4	hyperpolarization-activated, cyclic nucleotide-gated K+ 3	protein-coding
ALL_peak_99692	NO	YES	chr6	124808428	124808687	chr6.124808428	+	8.33765	NA	promoter-TSS (NM_001306051)	promoter-TSS (NM_001306051)	-104	NM_001306050	14794	Mm.261906	NM_013539	ENSMUSG00000038451	Spsb2	AI461677|C9|Grcc9|SSB2	splA/ryanodine receptor domain and SOCS box containing 2	protein-coding
ALL_peak_69970	NO	YES	chr2	170319167	170319579	chr2.170319167	+	8.33765	NA	Intergenic	Intergenic	-36988	NR_040610	73303	Mm.443297	NR_040610	ENSMUSG00000086999	Bcas1os2	1700040N02Rik	breast carcinoma amplified sequence 1, opposite strand 2	ncRNA
ALL_peak_88035	NO	YES	chr5	52216927	52217277	chr5.52216927	+	8.33765	NA	promoter-TSS (NR_040717)	promoter-TSS (NR_040717)	-669	NR_040717	414111	Mm.417638	NR_040717	ENSMUSG00000106464	C130083M11Rik	-	RIKEN cDNA C130083M11 gene	ncRNA
ALL_peak_100239	NO	YES	chr6	135324037	135324323	chr6.135324037	+	8.33765	NA	Intergenic	(TG)n|Simple_repeat|Simple_repeat	-13796	NM_029595	76400	Mm.293018	NM_029595	ENSMUSG00000047104	Pbp2	1700023A18Rik|AI326308|Pebp-2|Pebp2	phosphatidylethanolamine binding protein 2	protein-coding
ALL_peak_102439	NO	YES	chr7	30729880	30730261	chr7.30729880	+	8.33765	NA	promoter-TSS (NM_027215)	promoter-TSS (NM_027215)	-536	NM_027215	69804	Mm.27499	NM_027215	ENSMUSG00000006315	Tmem147	2010004E11Rik|5033425B17Rik|Nifie14	transmembrane protein 147	protein-coding
ALL_peak_114339	NO	YES	chr8	120745039	120745279	chr8.120745039	+	8.31381	NA	intron (NM_008320, intron 3 of 8)	(CA)n|Simple_repeat|Simple_repeat	6520	NM_001301811	15900	Mm.334861	NM_008320	ENSMUSG00000041515	Irf8	AI893568|ICSBP|IRF-8|Icsbp1|Myls	interferon regulatory factor 8	protein-coding
ALL_peak_74526	NO	YES	chr3	87907470	87907715	chr3.87907470	+	8.30709	NA	intron (NM_008231, intron 1 of 5)	(TG)n|Simple_repeat|Simple_repeat	1271	NM_008231	15191	Mm.292208	NM_008231	ENSMUSG00000004897	Hdgf	AI118077|D3Ertd299e	hepatoma-derived growth factor	protein-coding
ALL_peak_107624	NO	YES	chr7	135610741	135611137	chr7.135610741	+	8.30709	NA	intron (NM_001316679, intron 1 of 19)	(CA)n|Simple_repeat|Simple_repeat	5111	NM_001316679	19267	Mm.945	NM_011212	ENSMUSG00000041836	Ptpre	PTPe|PTPepsilon|RPTPepsilon	protein tyrosine phosphatase, receptor type, E	protein-coding
ALL_peak_7631	NO	YES	chr1	155075468	155075702	chr1.155075468	+	8.30709	NA	Intergenic	(TG)n|Simple_repeat|Simple_repeat	24051	NM_010500	15939	Mm.12246	NM_010500	ENSMUSG00000056708	Ier5	-	immediate early response 5	protein-coding
ALL_peak_56790	NO	YES	chr18	54833733	54833987	chr18.54833733	+	8.30709	NA	Intergenic	(CA)n|Simple_repeat|Simple_repeat	156320	NM_175751	269023	Mm.192984	NM_175751	ENSMUSG00000052713	Zfp608	4932417D18Rik|D430007A19Rik|Znf608	zinc finger protein 608	protein-coding
ALL_peak_78991	NO	YES	chr4	20090183	20090490	chr4.20090183	+	8.30709	NA	Intergenic	RMER17C-int|LTR|ERVK	48284	NM_010281	14590	Mm.20461	NM_010281		Ggh	gamma-GH	gamma-glutamyl hydrolase	protein-coding
ALL_peak_16561	NO	YES	chr11	8624122	8624350	chr11.8624122	+	8.30709	NA	intron (NM_001083587, intron 1 of 30)	RLTR20A4|LTR|ERVK	40299	NM_001083587	319939	Mm.337820	NM_001083587	ENSMUSG00000020422	Tns3	BC023928|F830010I22Rik|TEM6|Tens1	tensin 3	protein-coding
ALL_peak_20851	NO	YES	chr11	95712071	95712301	chr11.95712071	+	8.30709	NA	intron (NR_045780, intron 1 of 1)	(CA)n|Simple_repeat|Simple_repeat	568	NR_045780	432396	Mm.426849	NR_045780	ENSMUSG00000086191	Zfp652os	1110035M17Rik	zinc finger protein 652, opposite strand	ncRNA
ALL_peak_45249	NO	YES	chr16	10299353	10299583	chr16.10299353	+	8.30709	NA	intron (NM_007929, intron 1 of 4)	(TG)n|Simple_repeat|Simple_repeat	14500	NM_007929	13731	Mm.246009	NM_007929	ENSMUSG00000022505	Emp2	XMP	epithelial membrane protein 2	protein-coding
ALL_peak_117399	NO	YES	chr9	57745021	57745365	chr9.57745021	+	8.30709	NA	intron (NM_153799, intron 6 of 6)	(TG)n|Simple_repeat|Simple_repeat	20667	NM_007713	102414	Mm.25720	NM_007713	ENSMUSG00000032316	Clk3	AI256811	CDC-like kinase 3	protein-coding
ALL_peak_15075	NO	YES	chr10	108531417	108531787	chr10.108531417	+	8.30709	NA	intron (NM_001252342, intron 9 of 10)	(CA)n|Simple_repeat|Simple_repeat	168558	NM_203660	368203	Mm.452758	NM_203660		Gm5136	C6.1AL|EG368203	predicted gene 5136	protein-coding
ALL_peak_49844	NO	YES	chr17	6867375	6867688	chr17.6867375	+	8.30709	NA	Intergenic	(TG)n|Simple_repeat|Simple_repeat	27806	NR_030465	751529		NR_030465	ENSMUSG00000076218	Mir692-1	Mirn692-1|mir-692-1	microRNA 692-1	ncRNA
ALL_peak_15700	NO	YES	chr10	120399526	120399930	chr10.120399526	+	8.30709	NA	intron (NM_010441, intron 3 of 4)	intron (NM_010441, intron 3 of 4)	10205	NR_040626	320626	Mm.446091	NR_040626	ENSMUSG00000090191	9230105E05Rik	-	RIKEN cDNA 9230105E05 gene	ncRNA
ALL_peak_104842	NO	YES	chr7	80059773	80059990	chr7.80059773	+	8.30709	NA	intron (NM_175433, intron 1 of 4)	(TC)n|Simple_repeat|Simple_repeat	15376	NR_045695	100859962	Mm.392575	NR_045695		Gm21057	-	predicted gene, 21057	ncRNA
ALL_peak_15703	NO	YES	chr10	120433376	120433632	chr10.120433376	+	8.30709	NA	intron (NM_010441, intron 3 of 4)	(CA)n|Simple_repeat|Simple_repeat	14606	NR_030434	791076		NR_030434	ENSMUSG00000076448	Mir763	Mirn763|mir-763|mmu-mir-763	microRNA 763	ncRNA
ALL_peak_117444	NO	YES	chr9	58498689	58499062	chr9.58498689	+	8.30709	NA	intron (NM_176921, intron 2 of 2)	(CA)n|Simple_repeat|Simple_repeat	10272	NM_176921	319477	Mm.153674	NM_176921	ENSMUSG00000066607	6030419C18Rik	-	RIKEN cDNA 6030419C18 gene	protein-coding
ALL_peak_92832	NO	YES	chr5	139174701	139174979	chr5.139174701	+	8.30709	NA	intron (NM_001081265, intron 9 of 12)	(CA)n|Simple_repeat|Simple_repeat	24617	NM_001081265	433956	Mm.5547	NM_001081265	ENSMUSG00000025857	Dnaaf5	BC053401|C76907|Heatr2	dynein, axonemal, assembly factor 5	protein-coding
ALL_peak_87101	NO	YES	chr5	31646848	31647149	chr5.31646848	+	8.30709	NA	intron (NM_153196, intron 7 of 7)	(TG)n|Simple_repeat|Simple_repeat	20342	NR_105859	102466677		NR_105859	ENSMUSG00000099301	Mir3473e	Gm27422|mmu-mir-3473e	microRNA 3473e	ncRNA
ALL_peak_43892	NO	YES	chr15	85988123	85988366	chr15.85988123	+	8.30709	NA	intron (NM_009886, intron 1 of 34)	(TC)n|Simple_repeat|Simple_repeat	45533	NM_009886	12614	Mm.22680	NM_009886	ENSMUSG00000016028	Celsr1	Adgrc1|Crsh|Scy|crash	cadherin, EGF LAG seven-pass G-type receptor 1 (flamingo homolog, Drosophila)	protein-coding
ALL_peak_114097	NO	YES	chr8	116951552	116951814	chr8.116951552	+	8.30709	NA	intron (NM_177700, intron 1 of 3)	(TG)n|Simple_repeat|Simple_repeat	8290	NM_177700	234776	Mm.259736	NM_177700	ENSMUSG00000047388	Atmin	Asciz|gpg6|mKIAA0431	ATM interactor	protein-coding
ALL_peak_73081	NO	YES	chr3	58645718	58646320	chr3.58645718	+	8.30709	NA	Intergenic	(CA)n|Simple_repeat|Simple_repeat	-6023	NR_004433	666680	Mm.422212	NR_004433		Gm8234	AU022133	spermine synthase pseudogene	pseudo
ALL_peak_46200	NO	YES	chr16	30628695	30629063	chr16.30628695	+	8.30709	NA	Intergenic	G-rich|Low_complexity|Low_complexity	29156	NM_177632	224093	Mm.28244	NM_177632	ENSMUSG00000046546	Fam43a	Tuf1	family with sequence similarity 43, member A	protein-coding
ALL_peak_78456	NO	YES	chr4	8535315	8535551	chr4.8535315	+	8.30709	NA	promoter-TSS (NM_021518)	promoter-TSS (NM_021518)	-211	NM_021518	59021	Mm.397471	NM_021518	ENSMUSG00000047187	Rab2a	9330148M11Rik|C80220|Rab2	RAB2A, member RAS oncogene family	protein-coding
ALL_peak_109116	NO	YES	chr8	24574663	24575028	chr8.24574663	+	8.30709	NA	intron (NM_145949, intron 1 of 9)	intron (NM_145949, intron 1 of 9)	1488	NM_145949	209176	Mm.219580	NM_145949	ENSMUSG00000031549	Ido2	AI265623|C230043N17Rik|Ido-2|Indol1	indoleamine 2,3-dioxygenase 2	protein-coding
ALL_peak_91767	NO	YES	chr5	122515820	122516065	chr5.122515820	+	8.30709	NA	Intergenic	Intergenic	-13717	NR_027838	11938	Mm.227583	NM_009722	ENSMUSG00000029467	Atp2a2	9530097L16Rik|D5Wsu150e|SERCA2|SERCA2B|Serca2a|mKIAA4195	ATPase, Ca++ transporting, cardiac muscle, slow twitch 2	protein-coding
ALL_peak_101196	NO	YES	chr7	4164889	4165174	chr7.4164889	+	8.30709	NA	promoter-TSS (NM_021454)	promoter-TSS (NM_021454)	-332	NM_021454	58804	Mm.34268	NM_021454	ENSMUSG00000063838	Cdc42ep5	1700027J19Rik|2010007O02Rik|Borg3|C85526|CEP5	CDC42 effector protein (Rho GTPase binding) 5	protein-coding
ALL_peak_14204	NO	YES	chr10	93095491	93095825	chr10.93095491	+	8.30709	NA	Intergenic	(TG)n|Simple_repeat|Simple_repeat	-65218	NM_146239	237459	Mm.217404	NM_146239	ENSMUSG00000020015	Cdk17	6430598J10Rik|Pctk2	cyclin-dependent kinase 17	protein-coding
ALL_peak_89141	NO	YES	chr5	73355595	73355869	chr5.73355595	+	8.30709	NA	Intergenic	(TG)n|Simple_repeat|Simple_repeat	-16785	NM_001310636	433904	Mm.274892	NM_026950	ENSMUSG00000029153	Ociad2	1810027I20Rik	OCIA domain containing 2	protein-coding
ALL_peak_100214	NO	YES	chr6	135081727	135081989	chr6.135081727	+	8.30709	NA	intron (NM_181444, intron 2 of 3)	(TG)n|Simple_repeat|Simple_repeat	16196	NM_181444	232431	Mm.23575	NM_181444	ENSMUSG00000046733	Gprc5a	Rai3|Raig1	G protein-coupled receptor, family C, group 5, member A	protein-coding
ALL_peak_33376	NO	YES	chr13	109695618	109695866	chr13.109695618	+	8.30709	NA	intron (NM_011056, intron 3 of 16)	(TC)n|Simple_repeat|Simple_repeat	-208067	NR_035442	100316683		NR_035442	ENSMUSG00000084651	Mir1904	Mirn1904|mmu-mir-1904	microRNA 1904	ncRNA
ALL_peak_87253	NO	YES	chr5	35757269	35757516	chr5.35757269	+	8.30709	NA	promoter-TSS (NM_001177700)	promoter-TSS (NM_001177700)	-488	NM_001177696	231148	Mm.254446	NM_177678	ENSMUSG00000029095	Ablim2	AI606905|C230091L11	actin-binding LIM protein 2	protein-coding
ALL_peak_1717	NO	YES	chr1	40340951	40341452	chr1.40340951	+	8.30709	NA	intron (NM_133193, intron 4 of 10)	(CA)n|Simple_repeat|Simple_repeat	16574	NM_133193	107527	Mm.155583	NM_133193	ENSMUSG00000070942	Il1rl2	AI481289|AW551444|IL-1Rrp2	interleukin 1 receptor-like 2	protein-coding
ALL_peak_24198	NO	YES	chr12	35607670	35607906	chr12.35607670	+	8.30709	NA	Intergenic	(CA)n|Simple_repeat|Simple_repeat	-72799	NM_013464	11622	Mm.341377	NM_013464	ENSMUSG00000019256	Ahr	Ah|Ahh|Ahre|In|bHLHe76	aryl-hydrocarbon receptor	protein-coding
ALL_peak_36452	NO	YES	chr14	54435146	54435368	chr14.54435146	+	8.30709	NA	intron (NM_008608, intron 1 of 9)	(TG)n|Simple_repeat|Simple_repeat	3653	NM_008608	17387	Mm.280175	NM_008608	ENSMUSG00000000957	Mmp14	AI325305|MT-MMP-1|MT1-MMP|sabe	matrix metallopeptidase 14 (membrane-inserted)	protein-coding
ALL_peak_13710	NO	YES	chr10	83898046	83898268	chr10.83898046	+	8.30709	NA	Intergenic	RLTR17B_Mm|LTR|ERVK	175292	NM_001145198	69784	Mm.271188	NM_001145198	ENSMUSG00000087651	1500009L16Rik	2700050C19Rik|OCC-1	RIKEN cDNA 1500009L16 gene	protein-coding
ALL_peak_54773	NO	YES	chr18	11388251	11388539	chr18.11388251	+	8.30709	NA	Intergenic	IMPB_01|Satellite|Satellite	-244881	NR_045527	225182	Mm.154275	NM_175458	ENSMUSG00000041238	Rbbp8	9930104E21Rik|CtIP|RBBP-8|RIM|SAE2	retinoblastoma binding protein 8	protein-coding
ALL_peak_111085	NO	YES	chr8	61379785	61380051	chr8.61379785	+	8.30709	NA	intron (NM_021506, intron 10 of 11)	(TG)n|Simple_repeat|Simple_repeat	-91046	NR_045475	69279	Mm.417857	NR_045475	ENSMUSG00000099419	1700001D01Rik	-	RIKEN cDNA 1700001D01 gene	ncRNA
ALL_peak_104334	NO	YES	chr7	70565175	70565411	chr7.70565175	+	8.30709	NA	Intergenic	(CA)n|Simple_repeat|Simple_repeat	-198547	NM_183261	11819	Mm.158143	NM_009697	ENSMUSG00000030551	Nr2f2	2700033K02Rik|9430015G03Rik|ARP-1|Aporp1|COUP-TF2|COUP-TFII|COUPTFB|EAR3|SVP40|Tcfcoup2	nuclear receptor subfamily 2, group F, member 2	protein-coding
ALL_peak_30924	NO	YES	chr13	55327554	55327835	chr13.55327554	+	8.30709	NA	intron (NM_016662, intron 4 of 5)	(TG)n|Simple_repeat|Simple_repeat	2036	NM_016662	17121	Mm.20350	NM_016662	ENSMUSG00000021485	Mxd3	4631412E13Rik|Mad3|bHLHc13	Max dimerization protein 3	protein-coding
ALL_peak_68503	NO	YES	chr2	144301029	144301279	chr2.144301029	+	8.30709	NA	Intergenic	(TG)n|Simple_repeat|Simple_repeat	30208	NM_152947	107586	Mm.252750	NM_026924	ENSMUSG00000037279	Ovol2	1700108N11Rik|1810007D21Rik|M-OVO|M-OVO-A|M-OVO-B|MOVO|Ovo2|Zfp339|movo2	ovo-like 2 (Drosophila)	protein-coding
ALL_peak_41621	NO	YES	chr15	37312866	37313122	chr15.37312866	+	8.30709	NA	intron (NM_026496, intron 8 of 15)	(TG)n|Simple_repeat|Simple_repeat	79958	NM_026496	252973	Mm.244612	NM_026496	ENSMUSG00000022286	Grhl2	0610015A08Rik|BOM|Tcfcp2l3	grainyhead-like 2 (Drosophila)	protein-coding
ALL_peak_20194	NO	YES	chr11	83891383	83891620	chr11.83891383	+	8.30709	NA	intron (NM_001291268, intron 6 of 8)	(CA)n|Simple_repeat|Simple_repeat	38541	NM_001291269	21410	Mm.7226	NM_009330	ENSMUSG00000020679	Hnf1b	HNF-1-beta|HNF-1B|HNF-1Beta|Hnf1beta|LFB3|Tcf-2|Tcf2|vHNF1	HNF1 homeobox B	protein-coding
ALL_peak_6694	NO	YES	chr1	135789250	135789550	chr1.135789250	+	8.30709	NA	Intergenic	(CA)n|Simple_repeat|Simple_repeat	-10021	NM_021467	21952	Mm.44379	NM_021467	ENSMUSG00000026418	Tnni1	2700018B22Rik|AI747285|ssTnI	troponin I, skeletal, slow 1	protein-coding
ALL_peak_74595	NO	YES	chr3	89321926	89322176	chr3.89321926	+	8.30709	NA	intron (NM_010108, intron 1 of 4)	(TG)n|Simple_repeat|Simple_repeat	828	NM_010108	13638	Mm.331159	NM_010108	ENSMUSG00000028039	Efna3	AW494418|EFL-2|Ehk1-L|Epl3|LERK-3	ephrin A3	protein-coding
ALL_peak_16090	NO	YES	chr10	127150791	127151038	chr10.127150791	+	8.30709	NA	Intergenic	(TG)n|Simple_repeat|Simple_repeat	-14242	NM_001244617	14421	Mm.386762	NM_008080	ENSMUSG00000006731	B4galnt1	4933429D13Rik|Gal-NAc-T|GalNAc-T|GalNAcT|Galgt1|Ggm-2|Ggm2	beta-1,4-N-acetyl-galactosaminyl transferase 1	protein-coding
ALL_peak_102101	NO	YES	chr7	24369818	24370037	chr7.24369818	+	8.30709	NA	promoter-TSS (NM_001163510)	promoter-TSS (NM_001163510)	-336	NM_008433	16534	Mm.9911	NM_008433	ENSMUSG00000054342	Kcnn4	IK1|IKCA1|KCA4|KCa3.1|SK4|SKCas|mIKCa1	potassium intermediate/small conductance calcium-activated channel, subfamily N, member 4	protein-coding
ALL_peak_112286	NO	YES	chr8	83601306	83602079	chr8.83601306	+	8.29405	NA	Intergenic	(CA)n|Simple_repeat|Simple_repeat	-6483	NM_018808	81489	Mm.282092	NM_018808	ENSMUSG00000005483	Dnajb1	0610007I11Rik|DjB1|HSPF1|Hdj1|Hsp40	DnaJ (Hsp40) homolog, subfamily B, member 1	protein-coding
ALL_peak_6071	NO	YES	chr1	125508400	125508646	chr1.125508400	+	8.29074	NA	Intergenic	(TG)n|Simple_repeat|Simple_repeat	-52493	NM_028787	74150	Mm.28654	NM_028787	ENSMUSG00000026342	Slc35f5	1300003P13Rik|AI646727	solute carrier family 35, member F5	protein-coding
ALL_peak_120947	NO	YES	chr9	121422681	121422998	chr9.121422681	+	8.29074	NA	intron (NM_175114, intron 2 of 15)	(TG)n|Simple_repeat|Simple_repeat	55881	NM_175114	67095	Mm.491112	NM_175114	ENSMUSG00000032536	Trak1	2310001H13Rik|AI413908|AI467545|hyrt|mKIAA1042	trafficking protein, kinesin binding 1	protein-coding
ALL_peak_27963	NO	YES	chr12	111470970	111471251	chr12.111470970	+	8.21992	NA	Intergenic	(TG)n|Simple_repeat|Simple_repeat	14713	NM_001033248	212539	Mm.81916	NM_001033248	ENSMUSG00000010529	Gm266	-	predicted gene 266	protein-coding
ALL_peak_88642	NO	YES	chr5	64299871	64300154	chr5.64299871	+	8.21992	NA	intron (NM_001310611, intron 14 of 21)	(TG)n|Simple_repeat|Simple_repeat	69655	NM_001289514	57915	Mm.286353	NM_019636	ENSMUSG00000029174	Tbc1d1	1110062G02Rik|AI385682|AW555803|Nob1|Nobq1|Tbc1|mKIAA1108	TBC1 domain family, member 1	protein-coding
ALL_peak_21079	NO	YES	chr11	98863658	98863900	chr11.98863658	+	8.21992	NA	5' UTR (NM_197940, exon 1 of 8)	5' UTR (NM_197940, exon 1 of 8)	181	NM_197940	68524	Mm.28661	NM_197940	ENSMUSG00000038013	Wipf2	1110014J05Rik|5730509C05Rik|AA407487|Gm1176|Wich|Wire	WAS/WASL interacting protein family, member 2	protein-coding
ALL_peak_75336	NO	YES	chr3	104289539	104289869	chr3.104289539	+	8.21992	NA	Intergenic	(TC)n|Simple_repeat|Simple_repeat	-69298	NM_133853	99470	Mm.264849	NM_133853	ENSMUSG00000052539	Magi3	4732496O19Rik|6530407C02Rik|AA407180|AI120132|mKIAA1634	membrane associated guanylate kinase, WW and PDZ domain containing 3	protein-coding
ALL_peak_46309	NO	YES	chr16	32688561	32688795	chr16.32688561	+	8.21992	NA	Intergenic	(TG)n|Simple_repeat|Simple_repeat	15524	NM_001289443	51789	Mm.251115	NM_016788	ENSMUSG00000022791	Tnk2	Ack|Ack-1|Ack1|Cdgip|Pyk1	tyrosine kinase, non-receptor, 2	protein-coding
ALL_peak_109257	NO	YES	chr8	27186354	27186630	chr8.27186354	+	8.21992	NA	Intergenic	(TC)n|Simple_repeat|Simple_repeat	-11846	NM_001080813	75767	Mm.205335	NM_029423	ENSMUSG00000031488	Rab11fip1	2010200K21Rik|4833414G05Rik|Rcp	RAB11 family interacting protein 1 (class I)	protein-coding
ALL_peak_24063	NO	YES	chr12	33302280	33302540	chr12.33302280	+	8.21992	NA	promoter-TSS (NM_001033436)	promoter-TSS (NM_001033436)	-105	NM_001033436	380753	Mm.41540	NM_028139	ENSMUSG00000020564	Atxn7l1	2810423G08Rik|Atxn7l4	ataxin 7-like 1	protein-coding
ALL_peak_84489	NO	YES	chr4	133441073	133441518	chr4.133441073	+	8.21992	NA	Intergenic	(TG)n|Simple_repeat|Simple_repeat	-38838	NM_175307	100342	Mm.204656	NM_175307	ENSMUSG00000046694	Fam46b	4732473B16Rik|AU045678|AU046069	family with sequence similarity 46, member B	protein-coding
ALL_peak_107774	NO	YES	chr7	139285045	139285464	chr7.139285045	+	8.21992	NA	Intergenic	Intergenic	36772	NM_001098636	101631	Mm.334300	NM_001033206	ENSMUSG00000060260	Pwwp2b	AI594893|D7Ertd517e|D930023J19Rik|Pwwp2	PWWP domain containing 2B	protein-coding
ALL_peak_20902	NO	YES	chr11	96259867	96260190	chr11.96259867	+	8.21992	NA	intron (NR_037977, intron 1 of 2)	(TG)n|Simple_repeat|Simple_repeat	-5136	NR_029721	387191		NR_029721	ENSMUSG00000065546	Mir196a-1	Mirn196|Mirn196a-1|miR-196|mir-196a-1	microRNA 196a-1	ncRNA
ALL_peak_112358	NO	YES	chr8	84743741	84743955	chr8.84743741	+	8.21992	NA	intron (NM_001081982, intron 2 of 9)	(TG)n|Simple_repeat|Simple_repeat	30521	NM_001081981	18032	Mm.9394	NM_010906	ENSMUSG00000001911	Nfix	CTF|NF-I/X|NF1-X|NFI-X	nuclear factor I/X	protein-coding
ALL_peak_121483	NO	YES	chrX	36645608	36645887	chrX.36645608	+	8.205	NA	promoter-TSS (NM_001081956)	promoter-TSS (NM_001081956)	-333	NM_001081956	338351	Mm.116704	NM_001081956	ENSMUSG00000059708	Akap17b	AA407619|AKAP-17B|B230333C21Rik|C230056F04Rik|PRKA17B|Sfrs17b|Srsf17b|Talia	A kinase (PRKA) anchor protein 17B	protein-coding
ALL_peak_100340	NO	YES	chr6	136867277	136867805	chr6.136867277	+	8.205	NA	Intergenic	RLTR20A4|LTR|ERVK	8264	NM_008597	17313	Mm.243085	NM_008597	ENSMUSG00000030218	Mgp	Mglap	matrix Gla protein	protein-coding
ALL_peak_35669	NO	YES	chr14	40926849	40927173	chr14.40926849	+	8.205	NA	intron (NM_145928, intron 2 of 8)	(CA)n|Simple_repeat|Simple_repeat	21198	NM_001316748	52588	Mm.28876	NM_145928	ENSMUSG00000037824	Tspan14	AA958793|D14Ertd226e|Tm4sf14|tspan-14	tetraspanin 14	protein-coding
ALL_peak_60906	NO	YES	chr19	47834311	47834689	chr19.47834311	+	8.205	NA	intron (NM_027559, intron 2 of 37)	(TG)n|Simple_repeat|Simple_repeat	2861	NM_027559	100048534	Mm.29457	NM_027559	ENSMUSG00000044948	Cfap43	4632415N18Rik|4930428C11Rik|4930463G05Rik|AI429486|D19Ertd652e|Wdr96	cilia and flagella associated protein 43	protein-coding
ALL_peak_14232	NO	YES	chr10	93431339	93431618	chr10.93431339	+	8.205	NA	Intergenic	(CA)n|Simple_repeat|Simple_repeat	-1629	NR_106161	102465791		NR_106161	ENSMUSG00000098679	Mir7688	Gm27874|mmu-mir-7688	microRNA 7688	ncRNA
ALL_peak_60680	NO	YES	chr19	44267490	44267730	chr19.44267490	+	8.205	NA	Intergenic	(GA)n|Simple_repeat|Simple_repeat	-26066	NM_009128	20250	Mm.487021	NM_009128	ENSMUSG00000025203	Scd2	Mir5114|Scd-2|mir-5114|swty	stearoyl-Coenzyme A desaturase 2	protein-coding
ALL_peak_83555	NO	YES	chr4	117330944	117331240	chr4.117330944	+	8.193	NA	intron (NM_025739, intron 2 of 14)	(CA)n|Simple_repeat|Simple_repeat	-41637	NM_001310730	66743	Mm.318331	NM_025739	ENSMUSG00000028677	Rnf220	4732477A13|4931406I20Rik|5730503K05Rik|AV302541	ring finger protein 220	protein-coding
ALL_peak_48441	NO	YES	chr16	76866017	76866289	chr16.76866017	+	8.193	NA	Intergenic	(TC)n|Simple_repeat|Simple_repeat	144728	NR_040573	76601	Mm.396217	NR_040573	ENSMUSG00000100857	1700041M19Rik	-	RIKEN cDNA 1700041M19 gene	ncRNA
ALL_peak_49662	NO	YES	chr17	3326357	3326597	chr17.3326357	+	8.193	NA	promoter-TSS (NM_001122998)	promoter-TSS (NM_001122998)	-96	NM_001122998	24001	Mm.137134	NM_011878	ENSMUSG00000023800	Tiam2	3000002F19Rik|STEF|mKIAA2016	T cell lymphoma invasion and metastasis 2	protein-coding
ALL_peak_55963	NO	YES	chr18	38082203	38082730	chr18.38082203	+	8.193	NA	Intergenic	(TG)n|Simple_repeat|Simple_repeat	-83497	NM_001205336	106952	Mm.247642	NM_139206	ENSMUSG00000024451	Arap3	Centd3|Drag1|E030006K04Rik|cnt-d3	ArfGAP with RhoGAP domain, ankyrin repeat and PH domain 3	protein-coding
ALL_peak_72792	NO	YES	chr3	52104982	52105441	chr3.52104982	+	8.193	NA	promoter-TSS (NM_001004176)	promoter-TSS (NM_001004176)	-205	NM_001004176	433586	Mm.234972	NM_001004176	ENSMUSG00000061143	Maml3	AV234550|BC049812|Mam-2|mKIAA1816	mastermind like 3 (Drosophila)	protein-coding
ALL_peak_6650	NO	YES	chr1	135183659	135183914	chr1.135183659	+	8.19074	NA	Intergenic	(CA)n|Simple_repeat|Simple_repeat	-16105	NM_134438	171469	Mm.272290	NM_134438	ENSMUSG00000026424	Gpr37l1	AW047233|CAG-18|D0Kist8	G protein-coupled receptor 37-like 1	protein-coding
ALL_peak_32883	NO	YES	chr13	100201621	100201870	chr13.100201621	+	8.18315	NA	intron (NM_001126182, intron 1 of 15)	(CA)n|Simple_repeat|Simple_repeat	377	NM_001126182	17948	Mm.89961	NM_010872	ENSMUSG00000078945	Naip2	Birc1b|Naip-rs6	NLR family, apoptosis inhibitory protein 2	protein-coding
ALL_peak_32894	NO	YES	chr13	100341313	100341596	chr13.100341313	+	8.13314	NA	Intergenic	(CA)n|Simple_repeat|Simple_repeat	-23766	NM_021545	53880	Mm.218759	NM_021545		Naip7	Birc1g|Naip-rs4B|Naip6	NLR family, apoptosis inhibitory protein 7	protein-coding
ALL_peak_6718	NO	YES	chr1	136120210	136120534	chr1.136120210	+	8.11006	NA	TTS (NM_001081023)	TTS (NM_001081023)	10811	NR_046168	329253	Mm.487858	NR_046167	ENSMUSG00000086264	Gm15850	6530439I21|OTTMUSG00000026868	predicted gene 15850	ncRNA
ALL_peak_95798	NO	YES	chr6	47671707	47672132	chr6.47671707	+	8.07761	NA	TTS (NR_002841).8	TTS (NR_002841).8	480	NR_002841	19799		NR_002841		Rn4.5s	-	4.5S RNA	rRNA
ALL_peak_111276	NO	YES	chr8	65109750	65110079	chr8.65109750	+	8.06188	NA	intron (NR_033217, intron 1 of 2)	(TG)n|Simple_repeat|Simple_repeat	19623	NR_033217	407795	Mm.387876	NR_033217	ENSMUSG00000074300	BC030870	-	cDNA sequence BC030870	ncRNA
ALL_peak_111989	NO	YES	chr8	79121749	79122025	chr8.79121749	+	8.05973	NA	intron (NM_001294279, intron 7 of 14)	(TG)n|Simple_repeat|Simple_repeat	93450	NM_178267	622675	Mm.48724	NM_178267	ENSMUSG00000071064	Zfp827	2810449M09Rik|D630040G17Rik|Znf827	zinc finger protein 827	protein-coding
ALL_peak_57385	NO	YES	chr18	65490002	65490268	chr18.65490002	+	8.05708	NA	intron (NR_105742, intron 3 of 6)	(TG)n|Simple_repeat|Simple_repeat	59138	NM_172833	240354	Mm.132613	NM_172833	ENSMUSG00000032688	Malt1	A630046N12|D430033E09Rik	MALT1 paracaspase	protein-coding
ALL_peak_46167	NO	YES	chr16	30039047	30039286	chr16.30039047	+	8.05708	NA	intron (NR_045878, intron 1 of 3)	(CA)n|Simple_repeat|Simple_repeat	313	NR_045878	71528	Mm.297640	NR_045878		9030404E10Rik	-	RIKEN cDNA 9030404E10 gene	ncRNA
ALL_peak_65192	NO	YES	chr2	74711361	74711826	chr2.74711361	+	8.05708	NA	promoter-TSS (NM_010468)	promoter-TSS (NM_010468)	-400	NM_010468	15434	Mm.430708	NM_010468	ENSMUSG00000079277	Hoxd3	Hox-4.1|Hox-5.5	homeobox D3	protein-coding
ALL_peak_108478	NO	YES	chr8	11633284	11633511	chr8.11633284	+	8.05708	NA	intron (NM_001281974, intron 1 of 6)	(TC)n|Simple_repeat|Simple_repeat	1639	NR_030781	102334	Mm.12459	NM_133971	ENSMUSG00000031508	Ankrd10	4833425P12Rik|AW549277	ankyrin repeat domain 10	protein-coding
ALL_peak_120581	NO	YES	chr9	116173838	116174101	chr9.116173838	+	8.05708	NA	intron (NM_009371, intron 1 of 7)	(CA)n|Simple_repeat|Simple_repeat	1394	NM_029575	21813	Mm.172346	NM_009371	ENSMUSG00000032440	Tgfbr2	1110020H15Rik|AU042018|DNIIR|RIIDN|TBR-II|TbetaR-II|TbetaRII	transforming growth factor, beta receptor II	protein-coding
ALL_peak_96048	NO	YES	chr6	52200346	52200687	chr6.52200346	+	8.05708	NA	promoter-TSS (NR_015611)	promoter-TSS (NR_015611)	-608	NR_015611	72628	Mm.348030	NR_015611	ENSMUSG00000085696	Hoxaas3	2700086A05Rik	Hoxa cluster antisense RNA 3	ncRNA
ALL_peak_80032	NO	YES	chr4	44077983	44078278	chr4.44077983	+	8.05708	NA	intron (NM_015828, intron 1 of 11)	(CA)n|Simple_repeat|Simple_repeat	-5457	NM_001190414	50798	Mm.256718	NM_015828	ENSMUSG00000028479	Gne	2310066H07Rik|DMRV|GLCNE|IBM2|NM|Uae1	glucosamine (UDP-N-acetyl)-2-epimerase/N-acetylmannosamine kinase	protein-coding
ALL_peak_11650	NO	YES	chr10	42940874	42941128	chr10.42940874	+	8.02264	NA	intron (NM_172938, intron 6 of 8)	(GA)n|Simple_repeat|Simple_repeat	80489	NM_172938	268297	Mm.98731	NM_172938	ENSMUSG00000044770	Scml4	9330161D17|mFLJ00197	sex comb on midleg-like 4 (Drosophila)	protein-coding
ALL_peak_49805	NO	YES	chr17	5941144	5941399	chr17.5941144	+	8.02264	NA	promoter-TSS (NM_001113353)	promoter-TSS (NM_001113353)	-9	NM_001113353	20975	Mm.236068	NM_011523	ENSMUSG00000023805	Synj2	AI481647|SJ2|mKIAA0348	synaptojanin 2	protein-coding
ALL_peak_2433	NO	YES	chr1	55904104	55904351	chr1.55904104	+	7.97481	NA	Intergenic	Intergenic	-27014	NR_045837	329159	Mm.98697	NR_045837	ENSMUSG00000099950	9130227L01Rik	-	RIKEN cDNA 9130227L01 gene	ncRNA
ALL_peak_67603	NO	YES	chr2	125866375	125866621	chr2.125866375	+	7.97481	NA	intron (NM_001291002, intron 1 of 9)	(TG)n|Simple_repeat|Simple_repeat	275	NM_001291002	69976	Mm.20216	NM_175154	ENSMUSG00000027207	Galk2	2810017M24Rik|AI327030|Gk2	galactokinase 2	protein-coding
ALL_peak_120051	NO	YES	chr9	107313338	107313565	chr9.107313338	+	7.97481	NA	Intergenic	(TG)n|Simple_repeat|Simple_repeat	16762	NM_009895	12700	Mm.4592	NM_009895		Cish	AI385595|CIS1|Cis|F17|F23	cytokine inducible SH2-containing protein	protein-coding
ALL_peak_118695	NO	YES	chr9	80209960	80210196	chr9.80209960	+	7.97481	NA	intron (NM_001039546, intron 1 of 32)	(CA)n|Simple_repeat|Simple_repeat	45044	NM_001039546	17920	Mm.4040	NM_008662	ENSMUSG00000033577	Myo6	BC029719|Tlc|sv	myosin VI	protein-coding
ALL_peak_84655	NO	YES	chr4	136123218	136123489	chr4.136123218	+	7.97481	NA	Intergenic	(TG)n|Simple_repeat|Simple_repeat	-20469	NM_008321	15903	Mm.110	NM_008321		Id3	Hlh462|Idb3|bHLHb25	inhibitor of DNA binding 3	protein-coding
ALL_peak_62254	NO	YES	chr2	11331333	11331988	chr2.11331333	+	7.97481	NA	Intergenic	Intergenic	-7829	NR_040369	100503147	Mm.91961	NR_040369	ENSMUSG00000086006	Gm13293	OTTMUSG00000011311	predicted gene 13293	ncRNA
ALL_peak_4205	NO	YES	chr1	90601600	90601831	chr1.90601600	+	7.97481	NA	Intergenic	(TG)n|Simple_repeat|Simple_repeat	-1710	NM_133805	108679	Mm.119177	NM_133805	ENSMUSG00000034432	Cops8	9430009J09Rik|AA408242|Csn8|Sgn8	COP9 (constitutive photomorphogenic) homolog, subunit 8 (Arabidopsis thaliana)	protein-coding
ALL_peak_75378	NO	YES	chr3	105000464	105000737	chr3.105000464	+	7.97481	NA	Intergenic	IMPB_01|Satellite|Satellite	-38891	NM_009520	22414	Mm.10740	NM_009520	ENSMUSG00000027840	Wnt2b	Wnt13	wingless-type MMTV integration site family, member 2B	protein-coding
ALL_peak_114013	NO	YES	chr8	115707429	115707644	chr8.115707429	+	7.97481	NA	promoter-TSS (NM_001025577)	promoter-TSS (NM_001025577)	-642	NM_001025577	17132	Mm.275549	NM_001025577		Maf	2810401A20Rik|A230108G15Rik|AW047063|c-maf	avian musculoaponeurotic fibrosarcoma (v-maf) AS42 oncogene homolog	protein-coding
ALL_peak_88667	NO	YES	chr5	64749880	64750148	chr5.64749880	+	7.97481	NA	Intergenic	(TG)n|Simple_repeat|Simple_repeat	-53509	NM_008453	16599	Mm.392759	NM_008453	ENSMUSG00000029178	Klf3	9930027G08Rik|AL024007|Bklf|Tef-2	Kruppel-like factor 3 (basic)	protein-coding
ALL_peak_6841	NO	YES	chr1	138528921	138529159	chr1.138528921	+	7.97481	NA	intron (NM_001311148, intron 5 of 7)	intron (NM_001311148, intron 5 of 7)	90717	NM_001311148	59125	Mm.143817	NM_021605	ENSMUSG00000026393	Nek7	2810460C19Rik|AU020186	NIMA (never in mitosis gene a)-related expressed kinase 7	protein-coding
ALL_peak_58370	NO	YES	chr18	84399517	84399763	chr18.84399517	+	7.97481	NA	intron (NM_001033341, intron 4 of 8)	(CA)n|Simple_repeat|Simple_repeat	189864	NM_001033341	240476	Mm.329575	NM_001033341	ENSMUSG00000048410	Zfp407	6430585N13Rik|Gm333|Gm334|Gm948|ZNF407	zinc finger protein 407	protein-coding
ALL_peak_71593	NO	YES	chr3	28491450	28491670	chr3.28491450	+	7.97481	NA	intron (NM_001163007, intron 2 of 31)	(TG)n|Simple_repeat|Simple_repeat	71617	NR_130342	100628591		NR_130342	ENSMUSG00000092990	Mir466q	Mir446q|mmu-mir-466q|mu-mir-446q	microRNA 466q	ncRNA
ALL_peak_10838	NO	YES	chr10	25118179	25118541	chr10.25118179	+	7.97481	NA	Intergenic	(CA)n|Simple_repeat|Simple_repeat	180803	NM_018747	432442	Mm.485937	NM_018747	ENSMUSG00000039166	Akap7	6430401D08|AI662165|AKAP15|Akap18|BB170514	A kinase (PRKA) anchor protein 7	protein-coding
ALL_peak_22232	NO	YES	chr11	117299275	117300043	chr11.117299275	+	7.97481	NA	intron (NM_001113487, intron 2 of 10)	B2_Mm2|SINE|B2	-32056	NM_017380	53860	Mm.38450	NM_017380	ENSMUSG00000059248	2009-09-01	MSF1|Msf|PNUTL4|Sint1	septin 9	protein-coding
ALL_peak_56012	NO	YES	chr18	38892731	38892989	chr18.38892731	+	7.97481	NA	intron (NM_001033789, intron 2 of 4)	(CA)n|Simple_repeat|Simple_repeat	404	NM_001033789	545253	Mm.244585	NM_001033789		Gm5820	EG545253	predicted gene 5820	protein-coding
ALL_peak_97624	NO	YES	chr6	83868154	83868420	chr6.83868154	+	7.97481	NA	Intergenic	Intergenic	-36546	NM_146169	232164	Mm.404420	NM_146169	ENSMUSG00000045896	Paip2b	-	poly(A) binding protein interacting protein 2B	protein-coding
ALL_peak_114782	NO	YES	chr8	127234213	127234733	chr8.127234213	+	7.97481	NA	intron (NM_001309391, intron 2 of 24)	intron (NM_001309391, intron 2 of 24)	-65139	NM_001013581	93742	Mm.299254	NM_033620	ENSMUSG00000025812	Pard3	AA960621|AI256638|Asip|D8Ertd580e|Par-3|Par3|Pard-3|Pard3a|Phip	par-3 family cell polarity regulator	protein-coding
ALL_peak_32787	NO	YES	chr13	98715786	98716265	chr13.98715786	+	7.97481	NA	Intergenic	(CA)n|Simple_repeat|Simple_repeat	-21194	NM_001025606	380863	Mm.28264	NM_001025606	ENSMUSG00000052485	Tmem171	Gm905	transmembrane protein 171	protein-coding
ALL_peak_21045	NO	YES	chr11	98416950	98417861	chr11.98416950	+	7.97481	NA	intron (NM_001003817, intron 1 of 26)	(TG)n|Simple_repeat|Simple_repeat	4921	NM_001003817	13866	Mm.290822	NM_001003817	ENSMUSG00000062312	Erbb2	Erbb-2|HER-2|HER2|Neu|c-erbB2|c-neu|l11Jus8|mKIAA3023	v-erb-b2 erythroblastic leukemia viral oncogene homolog 2, neuro/glioblastoma derived oncogene homolog (avian)	protein-coding
ALL_peak_120080	NO	YES	chr9	107922593	107922860	chr9.107922593	+	7.97481	NA	Intergenic	(TG)n|Simple_repeat|Simple_repeat	-5743	NM_026338	67722	Mm.390222	NM_026338	ENSMUSG00000066368	Actl11	4921517D21Rik	actin-like 11	protein-coding
ALL_peak_81964	NO	YES	chr4	82436424	82436702	chr4.82436424	+	7.97481	NA	intron (NM_001286131, intron 2 of 9)	(TG)n|Simple_repeat|Simple_repeat	69216	NM_001286131	18028	Mm.317947	NM_008687	ENSMUSG00000008575	Nfib	6720429L07Rik|CTF|E030026I10Rik|NF-I/B|NF1-B|NFI-B	nuclear factor I/B	protein-coding
ALL_peak_99443	NO	YES	chr6	119662949	119663161	chr6.119662949	+	7.97481	NA	intron (NM_053204, intron 17 of 20)	(CA)n|Simple_repeat|Simple_repeat	-118708	NM_009525	22419	Mm.321818	NM_009525	ENSMUSG00000030170	Wnt5b	AW545702|Wnt-5b	wingless-type MMTV integration site family, member 5B	protein-coding
ALL_peak_35096	NO	YES	chr14	27297225	27297589	chr14.27297225	+	7.97481	NA	intron (NM_001289686, intron 4 of 12)	(TG)n|Simple_repeat|Simple_repeat	-38630	NM_001289687	71704	Mm.248606	NM_027871	ENSMUSG00000021895	Arhgef3	1200004I24Rik|9830169H03Rik|C76747|Xpln	Rho guanine nucleotide exchange factor (GEF) 3	protein-coding
ALL_peak_50188	NO	YES	chr17	13669544	13669816	chr17.13669544	+	7.97481	NA	Intergenic	(TG)n|Simple_repeat|Simple_repeat	-90861	NM_010806	17356	Mm.59167	NM_010806	ENSMUSG00000068036	Mllt4	5033403D15Rik|AF6|Af-6|Afadin|Gm314|I-afadin|S-afadin	myeloid/lymphoid or mixed-lineage leukemia (trithorax homolog, Drosophila); translocated to, 4	protein-coding
ALL_peak_12535	NO	YES	chr10	61544663	61544923	chr10.61544663	+	7.97481	NA	intron (NM_153542, intron 3 of 4)	intron (NM_153542, intron 3 of 4)	-50691	NM_001177511	237362	Mm.131297	NM_001177511		Npffr1	Gm236|Gpr147|NPFF1|OT7T022	neuropeptide FF receptor 1	protein-coding
ALL_peak_13987	NO	YES	chr10	89460010	89460262	chr10.89460010	+	7.97481	NA	intron (NM_009108, intron 7 of 8)	(TG)n|Simple_repeat|Simple_repeat	-16169	NM_001284344	237436	Mm.11982	NM_001033331	ENSMUSG00000074802	Gas2l3	8430435B07Rik|Gm240	growth arrest-specific 2 like 3	protein-coding
ALL_peak_83058	NO	YES	chr4	106996310	106996567	chr4.106996310	+	7.97481	NA	intron (NM_198438, intron 4 of 16)	intron (NM_198438, intron 4 of 16)	70428	NM_025500	56280	Mm.29517	NM_025500	ENSMUSG00000028622	Mrpl37	2300004O14Rik|AI132596|MRP-L2|Rpml2	mitochondrial ribosomal protein L37	protein-coding
ALL_peak_42748	NO	YES	chr15	62038896	62039203	chr15.62038896	+	7.97481	NA	promoter-TSS (NR_132746)	promoter-TSS (NR_132746)	-208	NR_132746	19296	Mm.4608	NM_011222	ENSMUSG00000097039	Pvt1	Ayu21-84Imeg|Gt(pU21)84Imeg|Mis-1|Mlvi-1|Pvt-1	plasmacytoma variant translocation 1	ncRNA
ALL_peak_24065	NO	YES	chr12	33333233	33333789	chr12.33333233	+	7.97481	NA	intron (NM_001033436, intron 2 of 7)	(CA)n|Simple_repeat|Simple_repeat	30996	NM_001033436	380753	Mm.41540	NM_028139	ENSMUSG00000020564	Atxn7l1	2810423G08Rik|Atxn7l4	ataxin 7-like 1	protein-coding
ALL_peak_46228	NO	YES	chr16	31167800	31168015	chr16.31167800	+	7.97481	NA	intron (NM_030138, intron 1 of 22)	(CA)n|Simple_repeat|Simple_repeat	33331	NM_030138	78618	Mm.274646	NM_030138	ENSMUSG00000049076	Acap2	4832442G16|9530039J15Rik|CNT-B2|Centb2|mKIAA0041	ArfGAP with coiled-coil, ankyrin repeat and PH domains 2	protein-coding
ALL_peak_91930	NO	YES	chr5	125393180	125393393	chr5.125393180	+	7.97481	NA	Intergenic	Intergenic	-3269	NM_019639	22190	Mm.331	NM_019639	ENSMUSG00000008348	Ubc	2700054O04Rik|AI194771|Rps27a|TI-225|Uba52|Ubb	ubiquitin C	protein-coding
ALL_peak_104120	NO	YES	chr7	66384299	66384566	chr7.66384299	+	7.97481	NA	intron (NM_146191, intron 1 of 33)	intron (NM_146191, intron 1 of 33)	-2708	NR_106024	102465640		NR_106024	ENSMUSG00000098353	Mir7057	Gm27550|mmu-mir-7057	microRNA 7057	ncRNA
ALL_peak_44610	NO	YES	chr15	100443499	100443734	chr15.100443499	+	7.97481	NA	Intergenic	(TG)n|Simple_repeat|Simple_repeat	20423	NR_040351	432982	Mm.234608	NM_001034883	ENSMUSG00000087444	Gm5475	EG432982	predicted gene 5475	ncRNA
ALL_peak_58704	NO	YES	chr19	3934563	3935245	chr19.3934563	+	7.97481	NA	promoter-TSS (NM_001161428)	promoter-TSS (NM_001161428)	-282	NM_019449	54445	Mm.262094	NM_019449	ENSMUSG00000036908	Unc93b1	Unc-93B1|Unc93b	unc-93 homolog B1 (C. elegans)	protein-coding
ALL_peak_28712	NO	YES	chr13	9277204	9277427	chr13.9277204	+	7.97481	NA	intron (NM_001081426, intron 1 of 36)	IMPB_01|Satellite|Satellite	790	NM_001081426	208440	Mm.217326	NM_172459	ENSMUSG00000048264	Dip2c	2900024P20Rik|9630044M06|mKIAA0934	DIP2 disco-interacting protein 2 homolog C (Drosophila)	protein-coding
ALL_peak_56301	NO	YES	chr18	44655383	44655601	chr18.44655383	+	7.97481	NA	intron (NM_001085373, intron 3 of 18)	intron (NM_001085373, intron 3 of 18)	-6173	NR_026853	626275	Mm.427116	NR_026853	ENSMUSG00000097610	A930012L18Rik	-	RIKEN cDNA A930012L18 gene	ncRNA
ALL_peak_104322	NO	YES	chr7	70429485	70429747	chr7.70429485	+	7.97481	NA	Intergenic	Intergenic	-62870	NM_183261	11819	Mm.158143	NM_009697	ENSMUSG00000030551	Nr2f2	2700033K02Rik|9430015G03Rik|ARP-1|Aporp1|COUP-TF2|COUP-TFII|COUPTFB|EAR3|SVP40|Tcfcoup2	nuclear receptor subfamily 2, group F, member 2	protein-coding
ALL_peak_51211	NO	YES	chr17	35814035	35814266	chr17.35814035	+	7.97481	NA	Intergenic	(TG)n|Simple_repeat|Simple_repeat	-7563	NM_133662	15937	Mm.25613	NM_133662	ENSMUSG00000003541	Ier3	AI663993|IEX-1|cI-3|gly96	immediate early response 3	protein-coding
ALL_peak_26357	NO	YES	chr12	80791628	80791864	chr12.80791628	+	7.97481	NA	intron (NM_178682, intron 1 of 5)	intron (NM_178682, intron 1 of 5)	1214	NM_178682	217684	Mm.341776	NM_178682	ENSMUSG00000021133	Susd6	4933426M11Rik|mKIAA0247	sushi domain containing 6	protein-coding
ALL_peak_49376	NO	YES	chr16	93923499	93923802	chr16.93923499	+	7.97481	NA	intron (NM_019500, intron 2 of 2)	(TG)n|Simple_repeat|Simple_repeat	5917	NM_001165925	56173	Mm.328716	NM_019500	ENSMUSG00000047109	Cldn14	AI851731	claudin 14	protein-coding
ALL_peak_51061	NO	YES	chr17	33032669	33032894	chr17.33032669	+	7.97481	NA	intron (NM_028543, intron 1 of 3)	(CA)n|Simple_repeat|Simple_repeat	600	NM_028543	73451	Mm.129453	NM_028543	ENSMUSG00000067430	Zfp763	1700065O13Rik|AI839635	zinc finger protein 763	protein-coding
ALL_peak_37497	NO	YES	chr14	74905303	74905646	chr14.74905303	+	7.97481	NA	intron (NM_001252132, intron 1 of 18)	(TG)n|Simple_repeat|Simple_repeat	42403	NM_001252132	380916	Mm.288868	NM_001033439	ENSMUSG00000068015	Lrch1	4832412D13Rik|AI552548|AW215503|Chdc1|mKIAA1016	leucine-rich repeats and calponin homology (CH) domain containing 1	protein-coding
ALL_peak_55814	NO	YES	chr18	34886732	34886948	chr18.34886732	+	7.97481	NA	Intergenic	(CA)n|Simple_repeat|Simple_repeat	25633	NM_007913	13653	Mm.181959	NM_007913		Egr1	A530045N19Rik|ETR103|Egr-1|Krox-1|Krox-24|Krox24|NGF1-A|NGFI-A|NGFIA|TIS8|Zenk|Zfp-6|Zif268|egr	early growth response 1	protein-coding
ALL_peak_73446	NO	YES	chr3	65857811	65858034	chr3.65857811	+	7.97481	NA	Intergenic	(GA)n|Simple_repeat|Simple_repeat	100303	NM_019937	56706	Mm.175612	NM_019937	ENSMUSG00000027829	Ccnl1	2610030E23Rik|AU018493|Ccnl|ania-6a	cyclin L1	protein-coding
ALL_peak_29129	NO	YES	chr13	17884053	17884407	chr13.17884053	+	7.97481	NA	intron (NM_019491, intron 4 of 4)	(CA)n|Simple_repeat|Simple_repeat	59987	NM_019491	56044	Mm.27348	NM_019491	ENSMUSG00000008859	Rala	3010001O15Rik|AW322615|Ral|Rasl1	v-ral simian leukemia viral oncogene homolog A (ras related)	protein-coding
ALL_peak_84521	NO	YES	chr4	133842345	133843193	chr4.133842345	+	7.97481	NA	Intergenic	RLTR20A4|LTR|ERVK	31962	NM_001285506	20111	Mm.301827	NM_009097	ENSMUSG00000003644	Rps6ka1	Mapkapk-1a|Rsk|Rsk-1|Rsk1|S6K-alpha-1|p90-Rsk1|p90Rsk1|p90S6K|p90rsk	ribosomal protein S6 kinase polypeptide 1	protein-coding
ALL_peak_67866	NO	YES	chr2	131478438	131478678	chr2.131478438	+	7.97481	NA	intron (NR_037281, intron 1 of 2)	intron (NR_037281, intron 1 of 2)	-13304	NM_001177835	228608	Mm.136586	NM_145533	ENSMUSG00000027333	Smox	B130066H01Rik|PAO|PAOh1|SMO	spermine oxidase	protein-coding
ALL_peak_45733	NO	YES	chr16	20824563	20824870	chr16.20824563	+	7.97481	NA	Intergenic	(CA)n|Simple_repeat|Simple_repeat	-90205	NM_009379	21832	Mm.3943	NM_009379	ENSMUSG00000022847	Thpo	Mgdf|Ml|Mpllg|Tpo	thrombopoietin	protein-coding
ALL_peak_37494	NO	YES	chr14	74847816	74848030	chr14.74847816	+	7.97481	NA	intron (NM_001252132, intron 2 of 18)	(CA)n|Simple_repeat|Simple_repeat	99954	NM_001252132	380916	Mm.288868	NM_001033439	ENSMUSG00000068015	Lrch1	4832412D13Rik|AI552548|AW215503|Chdc1|mKIAA1016	leucine-rich repeats and calponin homology (CH) domain containing 1	protein-coding
ALL_peak_4966	NO	YES	chr1	105925310	105925515	chr1.105925310	+	7.97481	NA	Intergenic	(CA)n|Simple_repeat|Simple_repeat	-64994	NM_001122676	227449	Mm.210188	NM_001122675	ENSMUSG00000038866	Zcchc2	9930114B20Rik|AW212015	zinc finger, CCHC domain containing 2	protein-coding
ALL_peak_14209	NO	YES	chr10	93138834	93139107	chr10.93138834	+	7.97481	NA	Intergenic	(CA)n|Simple_repeat|Simple_repeat	-21906	NM_146239	237459	Mm.217404	NM_146239	ENSMUSG00000020015	Cdk17	6430598J10Rik|Pctk2	cyclin-dependent kinase 17	protein-coding
ALL_peak_9589	NO	YES	chr1	192743062	192743796	chr1.192743062	+	7.97481	NA	intron (NM_144881, intron 3 of 11)	(CA)n|Simple_repeat|Simple_repeat	27790	NM_144881	226861	Mm.145857	NM_144881	ENSMUSG00000037375	Hhat	2810432O22Rik|AI462858|AP-2CRE|Skn|Tg(TFAP2A-cre)1Will	hedgehog acyltransferase	protein-coding
ALL_peak_9026	NO	YES	chr1	182509436	182509668	chr1.182509436	+	7.97481	NA	intron (NM_009794, intron 2 of 20)	(CA)n|Simple_repeat|Simple_repeat	7931	NM_009794	12334	Mm.19306	NM_009794	ENSMUSG00000026509	Capn2	AI326419|Capa-2|Capa2|m-calpain|m-calpin	calpain 2	protein-coding
ALL_peak_25976	NO	YES	chr12	73793044	73793293	chr12.73793044	+	7.97481	NA	Intergenic	Intergenic	-108156	NM_001313920	15251	Mm.3879	NM_010431	ENSMUSG00000021109	Hif1a	AA959795|HIF-1-alpha|HIF1-alpha|HIF1alpha|MOP1|bHLHe78	hypoxia inducible factor 1, alpha subunit	protein-coding
ALL_peak_45895	NO	YES	chr16	23994069	23994307	chr16.23994069	+	7.97481	NA	Intergenic	(TG)n|Simple_repeat|Simple_repeat	-5576	NM_009744	12053	Mm.347398	NM_009744	ENSMUSG00000022508	Bcl6	Bcl5	B cell leukemia/lymphoma 6	protein-coding
ALL_peak_9751	NO	YES	chr10	3870448	3870839	chr10.3870448	+	7.97481	NA	intron (NM_001159942, intron 2 of 16)	IMPB_01|Satellite|Satellite	-2024	NM_001033253	213783	Mm.150831	NM_001033253	ENSMUSG00000040624	Plekhg1	D10Ertd733e|Gm521|mKIAA1209	pleckstrin homology domain containing, family G (with RhoGef domain) member 1	protein-coding
ALL_peak_3065	NO	YES	chr1	69470631	69470855	chr1.69470631	+	7.97481	NA	Intergenic	(TG)n|Simple_repeat|Simple_repeat	215217	NM_011770	22779	Mm.106343	NM_011770	ENSMUSG00000025997	Ikzf2	A730095J18Rik|Helios|Zfpn1a2|Znfn1a2	IKAROS family zinc finger 2	protein-coding
ALL_peak_32487	NO	YES	chr13	92588821	92589196	chr13.92588821	+	7.97481	NA	Intergenic	RLTR17B_Mm|LTR|ERVK	-12776	NM_030237	79401	Mm.23520	NM_030237	ENSMUSG00000046957	Spz1	1700027M20Rik|AI429130	spermatogenic leucine zipper 1	protein-coding
ALL_peak_84460	NO	YES	chr4	133089605	133089826	chr4.133089605	+	7.97481	NA	Intergenic	(CA)n|Simple_repeat|Simple_repeat	-40918	NM_153423	242687	Mm.23566	NM_153423	ENSMUSG00000028868	Wasf2	AW742646|D4Ertd13e|WAVE2	WAS protein family, member 2	protein-coding
ALL_peak_6412	NO	YES	chr1	130633487	130633930	chr1.130633487	+	7.97481	NA	Intergenic	(GA)n|Simple_repeat|Simple_repeat	-4102	NM_009581	22789	Mm.4644	NM_009581	ENSMUSG00000042554	Zp3r	AV264399|SP56	zona pellucida 3 receptor	protein-coding
ALL_peak_56009	NO	YES	chr18	38853200	38853415	chr18.38853200	+	7.97481	NA	intron (NM_010197, intron 2 of 3)	(TG)n|Simple_repeat|Simple_repeat	-39149	NM_001033789	545253	Mm.244585	NM_001033789		Gm5820	EG545253	predicted gene 5820	protein-coding
ALL_peak_21999	NO	YES	chr11	113631421	113631671	chr11.113631421	+	7.97481	NA	Intergenic	Intergenic	12065	NM_009217	20606		NM_009217	ENSMUSG00000047904	Sstr2	SRIF-1|SS2R|SSTR-2|Smstr-2|Smstr2|sst2	somatostatin receptor 2	protein-coding
ALL_peak_117524	NO	YES	chr9	60291291	60291551	chr9.60291291	+	7.97481	NA	intron (NM_001040426, intron 6 of 17)	(TTTTG)n|Simple_repeat|Simple_repeat	-150201	NM_172444	207596	Mm.28791	NM_172444	ENSMUSG00000032289	Thsd4	ADAMTSL-6|ADAMTSL6|AI585901|Adamtsl4|B230114P05Rik	thrombospondin, type I, domain containing 4	protein-coding
ALL_peak_19918	NO	YES	chr11	79134492	79134732	chr11.79134492	+	7.95911	NA	intron (NM_013571, intron 1 of 17)	(TG)n|Simple_repeat|Simple_repeat	11742	NM_013571	16706	Mm.4745	NM_013571	ENSMUSG00000018334	Ksr1	AW492498|B-KSR1|D11Bhm183e|D11Bhm184e|Ksr|RSU2|hb	kinase suppressor of ras 1	protein-coding
ALL_peak_84375	NO	YES	chr4	131836609	131836970	chr4.131836609	+	7.95911	NA	intron (NM_001083119, intron 1 of 30)	CpG	1489	NM_011214	19273	Mm.4860	NM_011214	ENSMUSG00000028909	Ptpru	Ftp-1|PCP-2|PTP|PTP-lambda|PTPlambda|Pcp2|Ptpf|Ptprl|R-PTP-U|R-PTP-psi|RPTPlambda	protein tyrosine phosphatase, receptor type, U	protein-coding
ALL_peak_6720	NO	YES	chr1	136137618	136137873	chr1.136137618	+	7.94247	NA	intron (NM_001039472, intron 1 of 34)	(TG)n|Simple_repeat|Simple_repeat	6344	NM_001039472	16565	Mm.276135	NM_019962	ENSMUSG00000041642	Kif21b	2610511N21Rik|mKIAA0449	kinesin family member 21B	protein-coding
ALL_peak_117186	NO	YES	chr9	53330108	53330370	chr9.53330108	+	7.92871	NA	intron (NM_176846, intron 1 of 5)	(CA)n|Simple_repeat|Simple_repeat	28569	NM_176846	320051	Mm.277540	NM_176846		Exph5	AC079869.22gm5|B130009M24Rik|E030050P12|Kiaa0624|Slac2b|slac2-b	exophilin 5	protein-coding
ALL_peak_51003	NO	YES	chr17	31826880	31827321	chr17.31826880	+	7.92871	NA	Intergenic	(TG)n|Simple_repeat|Simple_repeat	28692	NM_010831	17691	Mm.290941	NM_010831	ENSMUSG00000024042	Sik1	Msk|Sik|Snf1lk	salt inducible kinase 1	protein-coding
ALL_peak_111578	NO	YES	chr8	70797121	70797633	chr8.70797121	+	7.92871	NA	promoter-TSS (NR_106099)	promoter-TSS (NR_106099)	-758	NR_106099	102466823		NR_106099	ENSMUSG00000099031	Mir7240	Gm27487|mmu-mir-7240	microRNA 7240	ncRNA
ALL_peak_84774	NO	YES	chr4	137930664	137930921	chr4.137930664	+	7.92871	NA	intron (NM_199307, intron 5 of 19)	(CA)n|Simple_repeat|Simple_repeat	-62664	NM_001256195	230861	Mm.268903	NM_172703	ENSMUSG00000028760	Eif4g3	1500002J22Rik|4833436O05|4930523M17Rik|G1-419-52|eIF4GII|repro8	eukaryotic translation initiation factor 4 gamma, 3	protein-coding
ALL_peak_83904	NO	YES	chr4	123717435	123717762	chr4.123717435	+	7.91196	NA	intron (NR_002445, intron 1 of 2)	(TC)n|Simple_repeat|Simple_repeat	563	NR_002445	170658	Mm.375824	NR_002445		BC002163	-	NADH dehydrogenase Fe-S protein 5 pseudogene	pseudo
ALL_peak_57174	NO	YES	chr18	61746581	61746806	chr18.61746581	+	7.91196	NA	intron (NM_178928, intron 9 of 18)	(TG)n|Simple_repeat|Simple_repeat	20303	NR_029432	68982	Mm.441992	NR_029432	ENSMUSG00000098702	1500015A07Rik	-	RIKEN cDNA 1500015A07 gene	ncRNA
ALL_peak_4229	NO	YES	chr1	90969000	90969261	chr1.90969000	+	7.91196	NA	intron (NM_008998, intron 1 of 5)	(CA)n|Simple_repeat|Simple_repeat	490	NM_008998	19329	Mm.279780	NM_008998	ENSMUSG00000026304	Rab17	AW413472	RAB17, member RAS oncogene family	protein-coding
ALL_peak_51729	NO	YES	chr17	45883685	45883990	chr17.45883685	+	7.91196	NA	Intergenic	(CA)n|Simple_repeat|Simple_repeat	141326	NM_001110267	22339	Mm.282184	NM_009505	ENSMUSG00000023951	Vegfa	Vegf|Vpf	vascular endothelial growth factor A	protein-coding
ALL_peak_43014	NO	YES	chr15	67145496	67145720	chr15.67145496	+	7.91196	NA	intron (NM_009177, intron 2 of 8)	(TG)n|Simple_repeat|Simple_repeat	31274	NM_009177	20442	Mm.248334	NM_009177	ENSMUSG00000013846	St3gal1	5330418N22Rik|AI467004|ST3GalI|Siat4|Siat4a|St3gal-1	ST3 beta-galactoside alpha-2,3-sialyltransferase 1	protein-coding
ALL_peak_44703	NO	YES	chr15	101980752	101981097	chr15.101980752	+	7.91196	NA	Intergenic	Intergenic	23418	NM_031170	16691	Mm.358618	NM_031170	ENSMUSG00000049382	Krt8	AA960620|AL022697|AU019895|Card2|EndoA|K8|Krt-2.8|Krt2-8	keratin 8	protein-coding
ALL_peak_62983	NO	YES	chr2	27027994	27028284	chr2.27027994	+	7.91196	NA	promoter-TSS (NM_172659)	promoter-TSS (NM_172659)	-141	NM_172659	227659	Mm.41203	NM_172659	ENSMUSG00000036067	Slc2a6	A330096C23|F630103L12Rik|Glut6|Glut9	solute carrier family 2 (facilitated glucose transporter), member 6	protein-coding
ALL_peak_65954	NO	YES	chr2	91387524	91387742	chr2.91387524	+	7.91196	NA	intron (NM_001311144, intron 2 of 8)	(CA)n|Simple_repeat|Simple_repeat	57009	NM_175123	228356	Mm.386861	NM_175123	ENSMUSG00000040591	1110051M20Rik	AI586322	RIKEN cDNA 1110051M20 gene	protein-coding
ALL_peak_17963	NO	YES	chr11	40447036	40447271	chr11.40447036	+	7.91196	NA	Intergenic	(TG)n|Simple_repeat|Simple_repeat	245529	NM_134017	108645	Mm.293771	NM_134017	ENSMUSG00000042032	Mat2b	1110064C04Rik|2410018D16Rik|AI182287|AU022853|MAT-II|MATIIbeta|TGR	methionine adenosyltransferase II, beta	protein-coding
ALL_peak_93419	NO	YES	chr5	147925064	147925617	chr5.147925064	+	7.91196	NA	Intergenic	Intergenic	-30538	NM_027872	71706	Mm.153218	NM_027872	ENSMUSG00000029650	Slc46a3	1200006F02Rik	solute carrier family 46, member 3	protein-coding
ALL_peak_6230	NO	YES	chr1	127796312	127796599	chr1.127796312	+	7.91196	NA	intron (NM_028399, intron 5 of 8)	(TG)n|Simple_repeat|Simple_repeat	22291	NM_028399	72949	Mm.268672	NM_028399		Ccnt2	2900041I18Rik|C81304|CycT2|CycT2a|CycT2b	cyclin T2	protein-coding
ALL_peak_20401	NO	YES	chr11	88161451	88161790	chr11.88161451	+	7.90798	NA	intron (NM_198013, intron 1 of 10)	(CA)n|Simple_repeat|Simple_repeat	-7945	NM_001172099	103841	Mm.374846	NM_198013	ENSMUSG00000018378	Cuedc1	AI841487|C330016O16Rik	CUE domain containing 1	protein-coding
ALL_peak_13048	NO	YES	chr10	70131774	70132001	chr10.70131774	+	7.89112	NA	intron (NM_001111121, intron 1 of 8)	(TG)n|Simple_repeat|Simple_repeat	34766	NM_001111121	76551	Mm.281741	NM_001111121	ENSMUSG00000048701	Ccdc6	2810012H18Rik|AA536681|AA960498|AW061011	coiled-coil domain containing 6	protein-coding
ALL_peak_97592	NO	YES	chr6	83440661	83441278	chr6.83440661	+	7.89112	NA	promoter-TSS (NR_028382)	promoter-TSS (NR_028382)	709	NM_183138	194388	Mm.211030	NM_183138	ENSMUSG00000034832	Tet3	B430006D22Rik|BC037432|D230004J03Rik	tet methylcytosine dioxygenase 3	protein-coding
ALL_peak_94332	NO	YES	chr6	17171179	17171469	chr6.17171179	+	7.89112	NA	Intergenic	Intergenic	-26427	NR_102305	319682	Mm.136046	NR_102304	ENSMUSG00000085171	D830026I12Rik	-	RIKEN cDNA D830026I12 gene	ncRNA
ALL_peak_53857	NO	YES	chr17	84893097	84893373	chr17.84893097	+	7.89112	NA	Intergenic	Intergenic	-63506	NM_001159497	19043	Mm.249695	NM_011151	ENSMUSG00000061130	Ppm1b	PP2CB	protein phosphatase 1B, magnesium dependent, beta isoform	protein-coding
ALL_peak_112529	NO	YES	chr8	88297749	88298118	chr8.88297749	+	7.89112	NA	intron (NM_001037724, intron 3 of 27)	intron (NM_001037724, intron 3 of 27)	3729	NM_001037724	11513	Mm.288206	NM_007406	ENSMUSG00000031659	Adcy7	AA407758	adenylate cyclase 7	protein-coding
ALL_peak_122942	NO	YES	chrX	169974528	169974765	chrX.169974528	+	7.89112	NA	TTS (NR_029457)	TTS (NR_029457)	4271	NR_029457	654820	Mm.34441	NM_001039559	ENSMUSG00000072844	G530011O06Rik	-	RIKEN cDNA G530011O06 gene	ncRNA
ALL_peak_46569	NO	YES	chr16	38781275	38781560	chr16.38781275	+	7.89112	NA	intron (NM_178924, intron 5 of 7)	(TG)n|Simple_repeat|Simple_repeat	18786	NM_178924	22268	Mm.130793	NM_178924	ENSMUSG00000049436	Upk1b	AI413235|Tspan20|UPIb|Upk1	uroplakin 1B	protein-coding
ALL_peak_80318	NO	YES	chr4	49452685	49452905	chr4.49452685	+	7.89112	NA	Intergenic	(TG)n|Simple_repeat|Simple_repeat	-1686	NM_001164565	230161	Mm.30101	NM_001164565		Acnat1	AI132189	acyl-coenzyme A amino acid N-acyltransferase 1	protein-coding
ALL_peak_70974	NO	YES	chr3	14582804	14583070	chr3.14582804	+	7.89112	NA	intron (NM_007892, intron 1 of 7)	(TG)n|Simple_repeat|Simple_repeat	4266	NM_007892	13559	Mm.153415	NM_007892	ENSMUSG00000027552	E2f5	AU024671|E2F-5	E2F transcription factor 5	protein-coding
ALL_peak_7572	NO	YES	chr1	154118010	154118250	chr1.154118010	+	7.89112	NA	Intergenic	(TG)n|Simple_repeat|Simple_repeat	-83057	NM_001204908	100503355	Mm.484410	NM_001204908	ENSMUSG00000066797	Zfp648	ENSMUSG00000066797|Gm10178|Gm203	zinc finger protein 648	protein-coding
ALL_peak_2365	NO	YES	chr1	54551555	54551858	chr1.54551555	+	7.89112	NA	intron (NM_001163314, intron 1 of 26)	(TG)n|Simple_repeat|Simple_repeat	5978	NM_001163314	241062	Mm.103539	NM_175508	ENSMUSG00000073678	Pgap1	5033403E17Rik|9030223K07Rik|A530084K22|D230012E17Rik|oto	post-GPI attachment to proteins 1	protein-coding
ALL_peak_92791	NO	YES	chr5	138657279	138657618	chr5.138657279	+	7.87143	NA	Intergenic	(TG)n|Simple_repeat|Simple_repeat	34589	NM_183025	243308	Mm.36612	NM_183025	ENSMUSG00000056014	A430033K04Rik	C86988	RIKEN cDNA A430033K04 gene	protein-coding
ALL_peak_22271	NO	YES	chr11	117816218	117816547	chr11.117816218	+	7.85333	NA	intron (NM_001271729, intron 5 of 5)	(TG)n|Simple_repeat|Simple_repeat	6715	NM_009304	20973	Mm.468228	NM_009304	ENSMUSG00000048277	Syngr2	Clast2|cellugyrin	synaptogyrin 2	protein-coding
ALL_peak_83610	NO	YES	chr4	118296058	118296304	chr4.118296058	+	7.83327	NA	Intergenic	(TG)n|Simple_repeat|Simple_repeat	-4784	NM_011213	19268	Mm.29855	NM_011213	ENSMUSG00000033295	Ptprf	AA591035|LAR|LARS|RPTP-LAR	protein tyrosine phosphatase, receptor type, F	protein-coding
ALL_peak_3322	NO	YES	chr1	74408375	74408700	chr1.74408375	+	7.83327	NA	promoter-TSS (NM_009509)	promoter-TSS (NM_009509)	-847	NM_009509	22349	Mm.471601	NM_009509	ENSMUSG00000026175	Vil1	Vil	villin 1	protein-coding
ALL_peak_90797	NO	YES	chr5	105823488	105824260	chr5.105823488	+	7.80994	NA	Intergenic	(TG)n|Simple_repeat|Simple_repeat	-52694	NR_030777	54367	Mm.248876	NM_018759	ENSMUSG00000029290	Zfp326	5730470H14Rik|ZAN75|Znf326	zinc finger protein 326	protein-coding
ALL_peak_46150	NO	YES	chr16	29788447	29788701	chr16.29788447	+	7.78566	NA	Intergenic	Intergenic	190550	NR_037689	328657	Mm.425982	NM_001033403		Gm1968	-	predicted gene 1968	ncRNA
ALL_peak_117610	NO	YES	chr9	61382175	61382430	chr9.61382175	+	7.78566	NA	intron (NM_009389, intron 4 of 19)	intron (NM_009389, intron 4 of 19)	9936	NM_009389	21887	Mm.24255	NM_009389	ENSMUSG00000032280	Tle3	2610103N05Rik|ESG|Grg3a|Grg3b|mKIAA1547	transducin-like enhancer of split 3, homolog of Drosophila E(spl)	protein-coding
ALL_peak_25010	NO	YES	chr12	54163460	54163837	chr12.54163460	+	7.78181	NA	Intergenic	(CA)n|Simple_repeat|Simple_repeat	40226	NM_028133	112407	Mm.133037	NM_028133	ENSMUSG00000035105	Egln3	2610021G09Rik|AI505553|AI648162|Hif-p4h-3|Phd3|SM-20	egl-9 family hypoxia-inducible factor 3	protein-coding
ALL_peak_19686	NO	YES	chr11	74597438	74597764	chr11.74597438	+	7.78181	NA	Intergenic	(CA)n|Simple_repeat|Simple_repeat	-7443	NM_001015046	380711	Mm.425690	NM_001015046	ENSMUSG00000038807	Rap1gap2	AU067654|Garnl4|Gm1561|mKIAA1039	RAP1 GTPase activating protein 2	protein-coding
ALL_peak_74886	NO	YES	chr3	95668205	95668581	chr3.95668205	+	7.78181	NA	Intergenic	Intergenic	9672	NM_008562	17210	Mm.1639	NM_008562	ENSMUSG00000038612	Mcl1	AW556805|Mcl-1	myeloid cell leukemia sequence 1	protein-coding
ALL_peak_112355	NO	YES	chr8	84663671	84663974	chr8.84663671	+	7.75815	NA	promoter-TSS (NM_010499)	promoter-TSS (NM_010499)	-970	NM_010499	15936	Mm.399	NM_010499	ENSMUSG00000053560	Ier2	AI317238|Ch1|Pip92	immediate early response 2	protein-coding
ALL_peak_15062	NO	YES	chr10	108333438	108334111	chr10.108333438	+	7.7472	NA	intron (NM_054056, intron 2 of 6)	intron (NM_054056, intron 2 of 6)	1585	NM_054056	114774	Mm.391419	NM_054056	ENSMUSG00000035873	Pawr	2310001G03Rik|PAR4|Par-4	PRKC, apoptosis, WT1, regulator	protein-coding
ALL_peak_99276	NO	YES	chr6	115503672	115504182	chr6.115503672	+	7.7472	NA	Intergenic	Intergenic	-40777	NM_199033	381802	Mm.291208	NM_199033	ENSMUSG00000042389	Tsen2	AU067695	tRNA splicing endonuclease 2 homolog (S. cerevisiae)	protein-coding
ALL_peak_38643	NO	YES	chr14	99476078	99476375	chr14.99476078	+	7.7472	NA	Intergenic	Intergenic	177535	NM_009769	12224	Mm.30262	NM_009769	ENSMUSG00000005148	Klf5	4930520J07Rik|Bteb2|CKLF|IKLF	Kruppel-like factor 5	protein-coding
ALL_peak_116049	NO	YES	chr9	31501136	31501439	chr9.31501136	+	7.7472	NA	Intergenic	(CA)n|Simple_repeat|Simple_repeat	-37049	NM_144936	235135	Mm.390134	NM_144936	ENSMUSG00000041737	Tmem45b	BC018222	transmembrane protein 45b	protein-coding
ALL_peak_92715	NO	YES	chr5	137455550	137455919	chr5.137455550	+	7.7472	NA	intron (NM_011741, intron 19 of 87)	(TC)n|Simple_repeat|Simple_repeat	21330	NM_011741	22635	Mm.7984	NM_011741	ENSMUSG00000079173	Zan	Zan-test	zonadhesin	protein-coding
ALL_peak_85040	NO	YES	chr4	141558702	141558934	chr4.141558702	+	7.7472	NA	Intergenic	RLTR20A4|LTR|ERVK	12656	NR_030695	320456	Mm.32859	NM_177163		B330016D10Rik	-	RIKEN cDNA B330016D10 gene	ncRNA
ALL_peak_28533	NO	YES	chr13	6028671	6028932	chr13.6028671	+	7.7472	NA	Intergenic	Intergenic	167312	NM_011803	23849	Mm.275036	NM_011803	ENSMUSG00000000078	Klf6	AI448727|BCD1|C86813|CPBP|Copeb|FM2|FM6|Ierepo1|Ierepo3|R75280|Zf9	Kruppel-like factor 6	protein-coding
ALL_peak_21164	NO	YES	chr11	100164645	100164918	chr11.100164645	+	7.7472	NA	Intergenic	(CA)n|Simple_repeat|Simple_repeat	-18855	NM_008471	16669	Mm.439699	NM_008471	ENSMUSG00000020911	Krt19	AI663979|CK-19|EndoC|K19|Krt-1.19|Krt1-19	keratin 19	protein-coding
ALL_peak_3378	NO	YES	chr1	75338128	75338351	chr1.75338128	+	7.70173	NA	Intergenic	(TG)n|Simple_repeat|Simple_repeat	-20602	NM_001110831	13437	Mm.24680	NM_016878	ENSMUSG00000026209	Dnpep	AA407814	aspartyl aminopeptidase	protein-coding
ALL_peak_12905	NO	YES	chr10	68276796	68277053	chr10.68276796	+	7.70173	NA	intron (NM_023598, intron 2 of 9)	(TG)n|Simple_repeat|Simple_repeat	1802	NM_023598	71371	Mm.440357	NM_023598	ENSMUSG00000019947	Arid5b	4930580B11|5430435G07Rik|AI467247|Desrt|Mrf2|Mrf2alpha|Mrf2beta	AT rich interactive domain 5B (MRF1-like)	protein-coding
ALL_peak_102288	NO	YES	chr7	27490682	27491010	chr7.27490682	+	7.66442	NA	TTS (NM_018820)	TTS (NM_018820)	3893	NM_018820	55942	Mm.153684	NM_018820	ENSMUSG00000008384	Sertad1	1110032C13Rik|AV000455|AW456625|Sei-1|Sei1|TRIP-Br1	SERTA domain containing 1	protein-coding
ALL_peak_68927	NO	YES	chr2	152742610	152742876	chr2.152742610	+	7.66442	NA	Intergenic	(TG)n|Simple_repeat|Simple_repeat	6492	NM_010495	15901	Mm.444	NM_010495	ENSMUSG00000042745	Id1	AI323524|D2Wsu140e|Idb1|bHLHb24	inhibitor of DNA binding 1	protein-coding
ALL_peak_31294	NO	YES	chr13	63918023	63918294	chr13.63918023	+	7.66442	NA	Intergenic	(GA)n|Simple_repeat|Simple_repeat	102824	NM_023507	76251	Mm.186610	NM_023507	ENSMUSG00000021470	Ercc6l2	0610007P08Rik|1700019D06Rik|9330134C04Rik|Rad26l|Sr278	excision repair cross-complementing rodent repair deficiency, complementation group 6 like 2	protein-coding
ALL_peak_68595	NO	YES	chr2	146525098	146525597	chr2.146525098	+	7.64252	NA	Intergenic	MTD|LTR|ERVL-MaLR	-13343	NM_001033348	241694	Mm.222310	NM_001033348	ENSMUSG00000037110	Ralgapa2	A230067G21Rik|AS250|BC053994|RGC2|pp250	Ral GTPase activating protein, alpha subunit 2 (catalytic)	protein-coding
ALL_peak_18093	NO	YES	chr11	43155361	43155617	chr11.43155361	+	7.64252	NA	intron (NM_176999, intron 3 of 22)	(CA)n|Simple_repeat|Simple_repeat	5612	NM_176999	319767	Mm.252339	NM_176999	ENSMUSG00000055415	Atp10b	5930426O13Rik|9030605H24Rik	ATPase, class V, type 10B	protein-coding
ALL_peak_87139	NO	YES	chr5	32414253	32414474	chr5.32414253	+	7.64252	NA	Intergenic	Intergenic	-44607	NM_172707	19046	Mm.241931	NM_172707		Ppp1cb	1200010B19	protein phosphatase 1, catalytic subunit, beta isoform	protein-coding
ALL_peak_1416	NO	YES	chr1	34061309	34061601	chr1.34061309	+	7.64252	NA	intron (NM_133833, intron 1 of 92)	(TG)n|Simple_repeat|Simple_repeat	49630	NM_134448	13518	Mm.336625	NM_010081	ENSMUSG00000026131	Dst	2310001O04Rik|A830042E19Rik|AW554249|BP230|BPAG1-n|Bpag|Bpag1|Macf2|ah|athetoid|dt|mKIAA0728|nmf203|nmf339	dystonin	protein-coding
ALL_peak_71686	NO	YES	chr3	30019830	30020065	chr3.30019830	+	7.64252	NA	Intergenic	(TC)n|Simple_repeat|Simple_repeat	-6743	NM_007963	14013	Mm.56965	NM_007963	ENSMUSG00000027684	Mecom	D630039M04Rik|Evi-1|Evi1|Jbo|Mds|Mds1|Mds1-Evi1|Prdm3|Znfpr1b1	MDS1 and EVI1 complex locus	protein-coding
ALL_peak_41415	NO	YES	chr15	32415881	32416141	chr15.32415881	+	7.64252	NA	intron (NM_009154, intron 2 of 22)	(CA)n|Simple_repeat|Simple_repeat	171198	NM_009154	20356	Mm.260374	NM_009154	ENSMUSG00000022231	Sema5a	5930434A13|9130201M22Rik|AI464145|Semaf|semF	sema domain, seven thrombospondin repeats (type 1 and type 1-like), transmembrane domain (TM) and short cytoplasmic domain, (semaphorin) 5A	protein-coding
ALL_peak_36760	NO	YES	chr14	60176900	60177137	chr14.60176900	+	7.64252	NA	Intergenic	CpG	51897	NR_030458	751526		NR_030458	ENSMUSG00000076270	Mir719	Mirn719|mmu-mir-719	microRNA 719	ncRNA
ALL_peak_22478	NO	YES	chr11	121516516	121516712	chr11.121516516	+	7.64252	NA	intron (NM_178763, intron 1 of 2)	(CGTG)n|Simple_repeat|Simple_repeat	2728	NM_178763	319530	Mm.11395	NM_178763	ENSMUSG00000039238	Zfp750	A030007D23Rik|Znf750	zinc finger protein 750	protein-coding
ALL_peak_120944	NO	YES	chr9	121337504	121337714	chr9.121337504	+	7.64252	NA	Intergenic	(TG)n|Simple_repeat|Simple_repeat	-29349	NM_175114	67095	Mm.491112	NM_175114	ENSMUSG00000032536	Trak1	2310001H13Rik|AI413908|AI467545|hyrt|mKIAA1042	trafficking protein, kinesin binding 1	protein-coding
ALL_peak_15200	NO	YES	chr10	111543979	111544248	chr10.111543979	+	7.64252	NA	Intergenic	Intergenic	37827	NM_009344	21664	Mm.3117	NM_009344	ENSMUSG00000020205	Phlda1	DT1P1B11|TDAG51|Tdag	pleckstrin homology-like domain, family A, member 1	protein-coding
ALL_peak_96066	NO	YES	chr6	52473693	52473907	chr6.52473693	+	7.64252	NA	Intergenic	(TG)n|Simple_repeat|Simple_repeat	-18651	NR_046049	74304	Mm.490579	NR_046049	ENSMUSG00000107895	1700094M24Rik	-	RIKEN cDNA 1700094M24 gene	ncRNA
ALL_peak_93225	NO	YES	chr5	144752976	144753213	chr5.144752976	+	7.64252	NA	intron (NM_177735, intron 2 of 7)	(CA)n|Simple_repeat|Simple_repeat	8484	NM_177735	243339	Mm.126793	NM_177735	ENSMUSG00000043388	Tmem130	BC067004|C130036G08	transmembrane protein 130	protein-coding
ALL_peak_23948	NO	YES	chr12	30943410	30943725	chr12.30943410	+	7.64252	NA	intron (NM_001289480, intron 7 of 8)	(TC)n|Simple_repeat|Simple_repeat	31898	NR_110343	24057	Mm.218624	NM_013709	ENSMUSG00000020669	Sh3yl1	AI314953|Ray|YSC84	Sh3 domain YSC-like 1	protein-coding
ALL_peak_42609	NO	YES	chr15	59823638	59823926	chr15.59823638	+	7.64252	NA	Intergenic	RLTR20A4|LTR|ERVK	-28823	NR_045076	100503021	Mm.402924	NR_045076		Gm19510	-	predicted gene, 19510	ncRNA
ALL_peak_32939	NO	YES	chr13	101095442	101095949	chr13.101095442	+	7.64252	NA	Intergenic	(TG)n|Simple_repeat|Simple_repeat	-136432	NR_046158	328324	Mm.402274	NR_046158		5930438M14Rik	5930438M14	RIKEN cDNA 5930438M14 gene	ncRNA
ALL_peak_6447	NO	YES	chr1	131460909	131461159	chr1.131460909	+	7.64252	NA	intron (NM_001081011, intron 2 of 22)	(GA)n|Simple_repeat|Simple_repeat	66327	NM_001081011	14270	Mm.276259	NM_019520	ENSMUSG00000026425	Srgap2	9930124L22Rik|AI448945|FBP2|Fnbp2|srGAP3	SLIT-ROBO Rho GTPase activating protein 2	protein-coding
ALL_peak_82571	NO	YES	chr4	95794102	95794540	chr4.95794102	+	7.64252	NA	intron (NM_001113412, intron 8 of 15)	intron (NM_001113412, intron 8 of 15)	172714	NR_045777	319247	Mm.473527	NM_175680	ENSMUSG00000044125	9530080O11Rik	-	RIKEN cDNA 9530080O11 gene	ncRNA
ALL_peak_6067	NO	YES	chr1	125482726	125483012	chr1.125482726	+	7.64252	NA	Intergenic	(CA)n|Simple_repeat|Simple_repeat	-47142	NM_001205386	74117	Mm.183102	NM_023735	ENSMUSG00000026341	Actr3	1200003A09Rik|Arp3	ARP3 actin-related protein 3	protein-coding
ALL_peak_65178	NO	YES	chr2	74202546	74202965	chr2.74202546	+	7.64252	NA	Intergenic	(CA)n|Simple_repeat|Simple_repeat	104962	NR_040501	73962	Mm.50289	NR_040501	ENSMUSG00000085405	4930441J16Rik	Astx1a|Astx1b|Astx1c	RIKEN cDNA 4930441J16 gene	ncRNA
ALL_peak_104821	NO	YES	chr7	79659756	79659962	chr7.79659756	+	7.64252	NA	promoter-TSS (NM_029835)	promoter-TSS (NM_029835)	-337	NM_029835	77011	Mm.28132	NM_029835	ENSMUSG00000046591	Ticrr	5730590G19Rik|BC028450|Lrrk1	TOPBP1-interacting checkpoint and replication regulator	protein-coding
ALL_peak_2599	NO	YES	chr1	59277707	59277922	chr1.59277707	+	7.64252	NA	intron (NM_001033373, intron 4 of 13)	(TG)n|Simple_repeat|Simple_repeat	20907	NM_001033373	271697	Mm.297713	NM_001033373	ENSMUSG00000026023	Cdk15	Als2cr7|Pftk2	cyclin-dependent kinase 15	protein-coding
ALL_peak_65236	NO	YES	chr2	75600689	75601092	chr2.75600689	+	7.64252	NA	Intergenic	RSINE1|SINE|B4	-58369	NM_146130	229279	Mm.316306	NM_053263	ENSMUSG00000059005	Hnrnpa3	2410013L13Rik|2610209F03Rik|2610510D13Rik|Hnrpa3	heterogeneous nuclear ribonucleoprotein A3	protein-coding
ALL_peak_100607	NO	YES	chr6	140614977	140615189	chr6.140614977	+	7.64252	NA	Intergenic	Intergenic	-7580	NM_178803	11569	Mm.86453	NM_009637	ENSMUSG00000030232	Aebp2	AU023766|B230313N05Rik	AE binding protein 2	protein-coding
ALL_peak_21163	NO	YES	chr11	100159325	100159568	chr11.100159325	+	7.64252	NA	Intergenic	RMER17C2|LTR|ERVK	-13520	NM_008471	16669	Mm.439699	NM_008471	ENSMUSG00000020911	Krt19	AI663979|CK-19|EndoC|K19|Krt-1.19|Krt1-19	keratin 19	protein-coding
ALL_peak_106319	NO	YES	chr7	111061338	111061710	chr7.111061338	+	7.64252	NA	Intergenic	Intergenic	21506	NM_001040131	13690	Mm.185453	NM_013507		Eif4g2	AA589388|DAP-5|E130105L11Rik|Nat1|Natm1|p97	eukaryotic translation initiation factor 4, gamma 2	protein-coding
ALL_peak_87708	NO	YES	chr5	45492001	45492294	chr5.45492001	+	7.64252	NA	Intergenic	(CA)n|Simple_repeat|Simple_repeat	-1227	NM_024434	66988	Mm.286830	NM_024434	ENSMUSG00000039682	Lap3	2410015L10Rik|AA410100|LAP-3|Lap|Lapep|Pep-7|Pep-S|Pep7|Peps	leucine aminopeptidase 3	protein-coding
ALL_peak_26686	NO	YES	chr12	86801042	86801308	chr12.86801042	+	7.64252	NA	Intergenic	Intergenic	66806	NM_001195767	627607	Mm.341880	NM_001195767	ENSMUSG00000059114	Lrrc74a	EG627607|Gm6772|Lrrc74	leucine rich repeat containing 74A	protein-coding
ALL_peak_69897	NO	YES	chr2	169591791	169592025	chr2.169591791	+	7.64252	NA	Intergenic	(TG)n|Simple_repeat|Simple_repeat	-41738	NM_080455	228911	Mm.315789	NM_080455	ENSMUSG00000047907	Tshz2	2900073F20Rik|B830045G17|Mtsh2|Sdccag33l|Tsh2|Zfp218|mKIAA4248|teashirt2	teashirt zinc finger family member 2	protein-coding
ALL_peak_8295	NO	YES	chr1	168432106	168432440	chr1.168432106	+	7.64252	NA	promoter-TSS (NM_001291509)	promoter-TSS (NM_001291509)	-104	NM_183355	18514	Mm.43358	NM_008783	ENSMUSG00000052534	Pbx1	2310056B04Rik|D230003C07Rik|Pbx-1	pre B cell leukemia homeobox 1	protein-coding
ALL_peak_43415	NO	YES	chr15	75850860	75851107	chr15.75850860	+	7.64252	NA	Intergenic	Intergenic	-9075	NM_172121	223642	Mm.209800	NM_172121	ENSMUSG00000075600	Zc3h3	BC049953|Kiaa0150|Smicl|Zc3hdc3	zinc finger CCCH type containing 3	protein-coding
ALL_peak_33291	NO	YES	chr13	108014057	108014277	chr13.108014057	+	7.64252	NA	Intergenic	Intergenic	-30307	NM_001048250	75616	Mm.491164	NM_001048250		Smim15	2810008M24Rik	small integral membrane protein 15	protein-coding
ALL_peak_21493	NO	YES	chr11	105990539	105990776	chr11.105990539	+	7.64252	NA	TTS (NM_009598)	TTS (NM_009598)	-4018	NM_001101453	217246	Mm.296699	NM_001101453	ENSMUSG00000101605	Ace3	EG217246	angiotensin I converting enzyme (peptidyl-dipeptidase A) 3	protein-coding
ALL_peak_45304	NO	YES	chr16	11017030	11017381	chr16.11017030	+	7.64252	NA	Intergenic	CT-rich|Low_complexity|Low_complexity	8307	NR_040518	100043147	Mm.489001	NR_040518	ENSMUSG00000097056	Gm4262	-	predicted gene 4262	ncRNA
ALL_peak_32739	NO	YES	chr13	98113373	98113586	chr13.98113373	+	7.64252	NA	intron (NM_012026, intron 2 of 35)	(TG)n|Simple_repeat|Simple_repeat	92686	NM_012026	110596	Mm.252718	NM_012026	ENSMUSG00000021662	Arhgef28	9230110L08Rik|AI323540|D13Bwg1089e|RIP2|Rgnef|RhoGEF|Rhoip2|p190RhoGEF	Rho guanine nucleotide exchange factor (GEF) 28	protein-coding
ALL_peak_87372	NO	YES	chr5	38479479	38479821	chr5.38479479	+	7.64252	NA	intron (NM_145559, intron 2 of 10)	(CA)n|Simple_repeat|Simple_repeat	656	NM_001102414	117591	Mm.260137	NM_145559	ENSMUSG00000005107	Slc2a9	Glut9|SLC2A9B|SLC2a9A	solute carrier family 2 (facilitated glucose transporter), member 9	protein-coding
ALL_peak_114477	NO	YES	chr8	123333136	123333458	chr8.123333136	+	7.64252	NA	intron (NM_172287, intron 1 of 14)	(CA)n|Simple_repeat|Simple_repeat	584	NM_172287	234857	Mm.150200	NM_172287	ENSMUSG00000010154	Spire2	BC026502|Spir-2|Spir2	spire homolog 2 (Drosophila)	protein-coding
ALL_peak_37540	NO	YES	chr14	75753110	75753406	chr14.75753110	+	7.64252	NA	intron (NM_177381, intron 1 of 22)	(CA)n|Simple_repeat|Simple_repeat	1235	NM_177381	338337	Mm.86507	NM_177381	ENSMUSG00000034893	Cog3	E430004N23	component of oligomeric golgi complex 3	protein-coding
ALL_peak_19191	NO	YES	chr11	64725623	64726021	chr11.64725623	+	7.64252	NA	Intergenic	(TG)n|Simple_repeat|Simple_repeat	-253213	NM_023479	68626	Mm.157711	NM_023479	ENSMUSG00000020549	Elac2	1110017O07Rik|D11Wsu80e|Hpc2	elaC homolog 2 (E. coli)	protein-coding
ALL_peak_106591	NO	YES	chr7	116288471	116288678	chr7.116288471	+	7.64252	NA	intron (NM_001305185, intron 3 of 26)	(CA)n|Simple_repeat|Simple_repeat	19802	NM_001305185	233765	Mm.3741	NM_172743	ENSMUSG00000045659	Plekha7	A430081P20Rik|AI414265	pleckstrin homology domain containing, family A member 7	protein-coding
ALL_peak_91654	NO	YES	chr5	120516889	120517112	chr5.120516889	+	7.64252	NA	intron (NM_133221, intron 2 of 15)	(TG)n|Simple_repeat|Simple_repeat	5808	NM_133221	170756	Mm.291070	NM_133221	ENSMUSG00000032754	Slc8b1	AF261233|NCKX6|NCLX|Slc24a6	solute carrier family 8 (sodium/lithium/calcium exchanger), member B1	protein-coding
ALL_peak_90027	NO	YES	chr5	90518312	90518536	chr5.90518312	+	7.64252	NA	promoter-TSS (NM_145146)	promoter-TSS (NM_145146)	-525	NM_145146	280662	Mm.348786	NM_145146	ENSMUSG00000029369	Afm	Alf|alpha-Alb	afamin	protein-coding
ALL_peak_67829	NO	YES	chr2	130761153	130761384	chr2.130761153	+	7.64252	NA	intron (NM_001311147, intron 20 of 36)	(CA)n|Simple_repeat|Simple_repeat	42833	NR_024097	100043766	Mm.447040	NR_024097		Gm14057	OTTMUSG00000015563	Ppp1r14c pseudogene	pseudo
ALL_peak_86068	NO	YES	chr5	7995207	7995883	chr5.7995207	+	7.64252	NA	Intergenic	(TG)n|Simple_repeat|Simple_repeat	35073	NM_054098	117167	Mm.31403	NM_054098	ENSMUSG00000012428	Steap4	1110021O17Rik|AI481214|Tiarp|Tnfaip9	STEAP family member 4	protein-coding
ALL_peak_26358	NO	YES	chr12	80793011	80793243	chr12.80793011	+	7.64252	NA	intron (NM_178682, intron 1 of 5)	(CA)n|Simple_repeat|Simple_repeat	2595	NM_178682	217684	Mm.341776	NM_178682	ENSMUSG00000021133	Susd6	4933426M11Rik|mKIAA0247	sushi domain containing 6	protein-coding
ALL_peak_9538	NO	YES	chr1	191793951	191794267	chr1.191793951	+	7.64252	NA	Intergenic	(TG)n|Simple_repeat|Simple_repeat	-27364	NM_010892	18005	Mm.33773	NM_010892	ENSMUSG00000026622	Nek2	AA617254|C77054	NIMA (never in mitosis gene a)-related expressed kinase 2	protein-coding
ALL_peak_35220	NO	YES	chr14	30624323	30624540	chr14.30624323	+	7.64252	NA	intron (NM_011103, intron 1 of 17)	(CA)n|Simple_repeat|Simple_repeat	1777	NM_011103	18753	Mm.2314	NM_011103	ENSMUSG00000021948	Prkcd	AI385711|D14Ertd420e|PKC[d]|PKCdelta|Pkcd	protein kinase C, delta	protein-coding
ALL_peak_80843	NO	YES	chr4	59717282	59717530	chr4.59717282	+	7.64252	NA	intron (NM_001015681, intron 2 of 3)	(CA)n|Simple_repeat|Simple_repeat	66449	NM_001013577	66209	Mm.51988	NM_001013577	ENSMUSG00000038544	Inip	1110054O05Rik|2610312O17Rik|AA399876|Ssbip1	INTS3 and NABP interacting protein	protein-coding
ALL_peak_30257	NO	YES	chr13	42303159	42303385	chr13.42303159	+	7.64252	NA	intron (NM_010104, intron 1 of 4)	(TC)n|Simple_repeat|Simple_repeat	2002	NM_010104	13614	Mm.14543	NM_010104	ENSMUSG00000021367	Edn1	ET-1|preproET	endothelin 1	protein-coding
ALL_peak_92630	NO	YES	chr5	136568976	136569261	chr5.136568976	+	7.64252	NA	Intergenic	Intergenic	-1628	NM_198602	13047	Mm.320317	NM_009986	ENSMUSG00000029705	Cux1	CDP|Cutl1|Cux|Cux-1	cut-like homeobox 1	protein-coding
ALL_peak_22200	NO	YES	chr11	116745522	116746555	chr11.116745522	+	7.64252	NA	Intergenic	(TG)n|Simple_repeat|Simple_repeat	-6129	NR_003364	193217	Mm.100084	NR_003364		BC018473	-	cDNA sequence BC018473	ncRNA
ALL_peak_31281	NO	YES	chr13	63627176	63627429	chr13.63627176	+	7.64252	NA	Intergenic	(TG)n|Simple_repeat|Simple_repeat	-61782	NM_008957	19206	Mm.228798	NM_008957	ENSMUSG00000021466	Ptch1	A230106A15Rik|Ptc|Ptc1|Ptch|mes	patched homolog 1	protein-coding
ALL_peak_43554	NO	YES	chr15	78983937	78984165	chr15.78983937	+	7.64252	NA	intron (NM_001024716, intron 1 of 13)	intron (NM_001024716, intron 1 of 13)	995	NM_001024716	110253	Mm.123714	NM_138579	ENSMUSG00000033088	Triobp	AI428493|EST478828|Tara|mKIAA1662	TRIO and F-actin binding protein	protein-coding
ALL_peak_21960	NO	YES	chr11	113000913	113001158	chr11.113000913	+	7.64252	NA	Intergenic	Intergenic	-175907	NR_130164	76393	Mm.86795	NR_130164		1700012H19Rik	-	RIKEN cDNA 1700012H19 gene	ncRNA
ALL_peak_85446	NO	YES	chr4	149171699	149171906	chr4.149171699	+	7.64252	NA	Intergenic	(CA)n|Simple_repeat|Simple_repeat	-5095	NM_001081274	110208	Mm.252080	NM_025801	ENSMUSG00000028961	Pgd	0610042A05Rik|AU019875|C78335	phosphogluconate dehydrogenase	protein-coding
ALL_peak_119455	NO	YES	chr9	96415811	96416026	chr9.96415811	+	7.64252	NA	Intergenic	(CA)n|Simple_repeat|Simple_repeat	-51619	NM_007502	11933	Mm.424	NM_007502	ENSMUSG00000032412	Atp1b3	AA409958|AI664000|AW212096	ATPase, Na+/K+ transporting, beta 3 polypeptide	protein-coding
ALL_peak_33674	NO	YES	chr13	114917425	114917776	chr13.114917425	+	7.64252	NA	intron (NM_008396, intron 1 of 29)	(CA)n|Simple_repeat|Simple_repeat	14441	NM_008396	16398	Mm.5007	NM_008396	ENSMUSG00000015533	Itga2	CD49B|DX5	integrin alpha 2	protein-coding
ALL_peak_22186	NO	YES	chr11	116522415	116522651	chr11.116522415	+	7.64252	NA	Intergenic	RLTR20C1_MM|LTR|ERVK	-9378	NM_001172475	20698	Mm.20944	NM_011451	ENSMUSG00000061878	Sphk1	1110006G24Rik|Sk1|Spk1	sphingosine kinase 1	protein-coding
ALL_peak_3482	NO	YES	chr1	77513867	77514094	chr1.77513867	+	7.64252	NA	intron (NM_007936, intron 1 of 17)	(CA)n|Simple_repeat|Simple_repeat	1108	NM_007936	13838	Mm.400747	NM_007936	ENSMUSG00000026235	Epha4	2900005C20Rik|AI385584|Cek8|Hek8|Sek|Sek1|Tyro1|rb	Eph receptor A4	protein-coding
ALL_peak_43449	NO	YES	chr15	76873859	76874132	chr15.76873859	+	7.64252	NA	Intergenic	PB1D9|SINE|Alu	-2560	NM_001007568	71591	Mm.38195	NM_001007568	ENSMUSG00000022526	Zfp251	9130001M19Rik|AV339307	zinc finger protein 251	protein-coding
ALL_peak_63311	NO	YES	chr2	33467765	33468016	chr2.33467765	+	7.64252	NA	intron (NM_027947, intron 1 of 3)	intron (NM_027947, intron 1 of 3)	642	NM_027947	71834	Mm.44186	NM_027947	ENSMUSG00000026788	Zbtb43	1700010E06Rik|Zfp297b|mKIAA0414	zinc finger and BTB domain containing 43	protein-coding
ALL_peak_24020	NO	YES	chr12	32451065	32451378	chr12.32451065	+	7.64252	NA	Intergenic	Intergenic	72432	NM_001162903	72123	Mm.341352	NM_028111	ENSMUSG00000090946	Ccdc71l	2010109K11Rik|AV375874	coiled-coil domain containing 71 like	protein-coding
ALL_peak_100415	NO	YES	chr6	137843679	137843922	chr6.137843679	+	7.64252	NA	Intergenic	(TG)n|Simple_repeat|Simple_repeat	89223	NM_172733	232449	Mm.29181	NM_172733	ENSMUSG00000030225	Dera	2010002D22Rik|2500002K03Rik|DEOC	2-deoxyribose-5-phosphate aldolase homolog (C. elegans)	protein-coding
ALL_peak_38636	NO	YES	chr14	99385718	99385964	chr14.99385718	+	7.64252	NA	Intergenic	Intergenic	87150	NM_009769	12224	Mm.30262	NM_009769	ENSMUSG00000005148	Klf5	4930520J07Rik|Bteb2|CKLF|IKLF	Kruppel-like factor 5	protein-coding
ALL_peak_55183	NO	YES	chr18	21109381	21109636	chr18.21109381	+	7.64252	NA	Intergenic	RSINE1|SINE|B4	37164	NM_008586	17288	Mm.2682	NM_008586	ENSMUSG00000024313	Mep1b	Mep-1b	meprin 1 beta	protein-coding
ALL_peak_43345	NO	YES	chr15	74621848	74622076	chr15.74621848	+	7.64252	NA	intron (NM_001177437, intron 11 of 26)	(CA)n|Simple_repeat|Simple_repeat	14356	NM_001177437	69439	Mm.263708	NM_001177437	ENSMUSG00000022603	Mroh4	1700016M24Rik	maestro heat-like repeat family member 4	protein-coding
ALL_peak_114752	NO	YES	chr8	126828596	126829138	chr8.126828596	+	7.64252	NA	Intergenic	IMPB_01|Satellite|Satellite	117054	NM_024214	67952	Mm.6932	NM_024214	ENSMUSG00000093904	Tomm20	1810060K07Rik|BB284719|Gm19268|MAS20|MOM19|TOM20|mKIAA0016	translocase of outer mitochondrial membrane 20 homolog (yeast)	protein-coding
ALL_peak_41808	NO	YES	chr15	41727472	41727753	chr15.41727472	+	7.64252	NA	intron (NM_001130166, intron 3 of 16)	RLTR31D_MM|LTR|ERVK	-61422	NM_001130165	170719	Mm.254267	NM_130885	ENSMUSG00000022307	Oxr1	2210416C20Rik|C7|C7B	oxidation resistance 1	protein-coding
ALL_peak_3782	NO	YES	chr1	83116274	83116551	chr1.83116274	+	7.64252	NA	promoter-TSS (NM_001159738)	promoter-TSS (NM_001159738)	-354	NM_016960	20297	Mm.116739	NM_016960	ENSMUSG00000026166	Ccl20	CKb4|LARC|MIP-3A|MIP-3[a]|MIP3A|ST38|Scya20|exodus-1	chemokine (C-C motif) ligand 20	protein-coding
ALL_peak_51394	NO	YES	chr17	40884932	40885180	chr17.40884932	+	7.64252	NA	Intergenic	(TG)n|Simple_repeat|Simple_repeat	-4498	NM_027834	71583	Mm.158733	NM_027834	ENSMUSG00000054951	9130008F23Rik	-	RIKEN cDNA 9130008F23 gene	protein-coding
ALL_peak_10568	NO	YES	chr10	19991802	19992039	chr10.19991802	+	7.64252	NA	intron (NM_008580, intron 1 of 29)	(GA)n|Simple_repeat|Simple_repeat	57394	NM_008580	26408	Mm.6595	NM_008580	ENSMUSG00000071369	Map3k5	7420452D20Rik|ASK|ASK1|MAPKKK5|Mekk5	mitogen-activated protein kinase kinase kinase 5	protein-coding
ALL_peak_51390	NO	YES	chr17	40837551	40838197	chr17.40837551	+	7.64252	NA	intron (NM_011269, intron 9 of 9)	(GGAA)n|Simple_repeat|Simple_repeat	26725	NM_011269	19743	Mm.12961	NM_011269	ENSMUSG00000023926	Rhag	CD241|Rh50|Rh50A	Rhesus blood group-associated A glycoprotein	protein-coding
ALL_peak_87294	NO	YES	chr5	36685144	36685367	chr5.36685144	+	7.64252	NA	intron (NM_001081232, intron 1 of 8)	(CA)n|Simple_repeat|Simple_repeat	10766	NM_001081232	320661	Mm.26480	NM_177221	ENSMUSG00000029190	D5Ertd579e	9030221A05Rik|A930018H20Rik|Kiaa0232|mKIAA0232	DNA segment, Chr 5, ERATO Doi 579, expressed	protein-coding
ALL_peak_17742	NO	YES	chr11	35944945	35945270	chr11.35944945	+	7.64252	NA	intron (NM_170779, intron 1 of 22)	(GA)n|Simple_repeat|Simple_repeat	34982	NM_170779	211652	Mm.31267	NM_170779		Wwc1	AA408228|AU017197|BC037006|Kibra|mKIAA0869	WW, C2 and coiled-coil domain containing 1	protein-coding
ALL_peak_60642	NO	YES	chr19	43604954	43605148	chr19.43604954	+	7.64252	NA	Intergenic	Intergenic	-7274	NM_008699	18089	Mm.56994	NM_008699	ENSMUSG00000044220	Nkx2-3	Nkx-2.3|Nkx2.3|tinman	NK2 homeobox 3	protein-coding
ALL_peak_21101	NO	YES	chr11	99255564	99255808	chr11.99255564	+	7.64252	NA	Intergenic	(TG)n|Simple_repeat|Simple_repeat	-11619	NM_172946	268481	Mm.133193	NM_172946	ENSMUSG00000035849	Krt222	6330509G02Rik	keratin 222	protein-coding
ALL_peak_111277	NO	YES	chr8	65111656	65112173	chr8.65111656	+	7.64252	NA	intron (NR_033217, intron 1 of 2)	(CA)n|Simple_repeat|Simple_repeat	17623	NR_033217	407795	Mm.387876	NR_033217	ENSMUSG00000074300	BC030870	-	cDNA sequence BC030870	ncRNA
ALL_peak_66974	NO	YES	chr2	113430811	113431027	chr2.113430811	+	7.64252	NA	intron (NM_010230, intron 3 of 19)	(CA)n|Simple_repeat|Simple_repeat	-10145	NM_001285459	14260	Mm.4938	NM_010230	ENSMUSG00000044042	Fmn1	Fmn|ld	formin 1	protein-coding
ALL_peak_3058	NO	YES	chr1	69367692	69367907	chr1.69367692	+	7.64252	NA	Intergenic	(CA)n|Simple_repeat|Simple_repeat	-259740	NM_010154	13869	Mm.442420	NM_010154	ENSMUSG00000062209	Erbb4	Her4|c-erbB-4	v-erb-a erythroblastic leukemia viral oncogene homolog 4 (avian)	protein-coding
ALL_peak_65109	NO	YES	chr2	72308293	72308548	chr2.72308293	+	7.64252	NA	intron (NM_178084, intron 2 of 9)	(TG)n|Simple_repeat|Simple_repeat	22719	NM_178084	65964	Mm.304143	NM_023057	ENSMUSG00000004085	Zak	AV006891|B230120H23Rik|MLTK|MLTKalpha|MLTKbeta	sterile alpha motif and leucine zipper containing kinase AZK	protein-coding
ALL_peak_13300	NO	YES	chr10	75188211	75188687	chr10.75188211	+	7.64252	NA	Intergenic	(TG)n|Simple_repeat|Simple_repeat	-23624	NM_153406	74392	Mm.27716	NM_153406	ENSMUSG00000033444	Specc1l	4930470P14Rik|4932439K10Rik|9530057A13Rik|AI317249|Cytsa|mKIAA0376	sperm antigen with calponin homology and coiled-coil domains 1-like	protein-coding
ALL_peak_17495	NO	YES	chr11	30872656	30872949	chr11.30872656	+	7.64252	NA	intron (NM_134013, intron 43 of 46)	(GA)n|Simple_repeat|Simple_repeat	-12556	NM_175490	237716	Mm.338361	NM_175490	ENSMUSG00000043999	Gpr75	-	G protein-coupled receptor 75	protein-coding
ALL_peak_57363	NO	YES	chr18	65036897	65037148	chr18.65036897	+	7.64252	NA	intron (NM_031881, intron 1 of 29)	(CA)n|Simple_repeat|Simple_repeat	13495	NM_031881	83814	Mm.98668	NM_031881	ENSMUSG00000024589	Nedd4l	1300012C07Rik|Nedd4-2|Nedd4b	neural precursor cell expressed, developmentally down-regulated gene 4-like	protein-coding
ALL_peak_93368	NO	YES	chr5	147260492	147260767	chr5.147260492	+	7.64252	NA	intron (NR_038157, intron 1 of 5)	(TG)n|Simple_repeat|Simple_repeat	-9502	NM_008814	18609	Mm.389714	NM_008814		Pdx1	IDX-1|IPF-1|Ipf1|Mody4|STF-1|pdx-1	pancreatic and duodenal homeobox 1	protein-coding
ALL_peak_21364	NO	YES	chr11	103336721	103337031	chr11.103336721	+	7.64252	NA	intron (NM_133715, intron 8 of 15)	RLTR17B_Mm|LTR|ERVK	7826	NM_133715	544817	Mm.259113	NM_133715	ENSMUSG00000034255	Arhgap27	2310069I04Rik|5730442P18Rik|Gm21552|Sh3d20	Rho GTPase activating protein 27	protein-coding
ALL_peak_59570	NO	YES	chr19	23041706	23041998	chr19.23041706	+	7.64252	NA	Intergenic	(CA)n|Simple_repeat|Simple_repeat	-99374	NM_010638	16601	Mm.291595	NM_010638	ENSMUSG00000033863	Klf9	2310051E17Rik|AA589643|BTEB-1|Bteb1|ENSMUSG00000055440|Gm9971	Kruppel-like factor 9	protein-coding
ALL_peak_36912	NO	YES	chr14	63111807	63112080	chr14.63111807	+	7.64252	NA	Intergenic	IMPB_01|Satellite|Satellite	-10519	NM_007798	13030	Mm.236553	NM_007798	ENSMUSG00000021939	Ctsb	CB	cathepsin B	protein-coding
ALL_peak_9923	NO	YES	chr10	6845499	6846078	chr10.6845499	+	7.64252	NA	intron (NM_001304950, intron 3 of 4)	intron (NM_001304950, intron 3 of 4)	57212	NM_001039652	18390	Mm.438000	NM_011013	ENSMUSG00000000766	Oprm1	M-OR-1|MOP-R|MOR-1|MOR-1O|Oprm|mor|muOR	opioid receptor, mu 1	protein-coding
ALL_peak_64137	NO	YES	chr2	52421532	52421734	chr2.52421532	+	7.64252	NA	intron (NM_182994, intron 1 of 5)	intron (NM_182994, intron 1 of 5)	3241	NM_182994	75423	Mm.314378	NM_182994	ENSMUSG00000036093	Arl5a	2410015N24Rik|2810410P22Rik|AA408731|AW610751|Arl5|T25534	ADP-ribosylation factor-like 5A	protein-coding
ALL_peak_30876	NO	YES	chr13	54677169	54677390	chr13.54677169	+	7.64252	NA	Intergenic	(TG)n|Simple_repeat|Simple_repeat	10529	NM_001146025	105239	Mm.25366	NM_134064	ENSMUSG00000034928	Rnf44	AI854545|mKIAA1100	ring finger protein 44	protein-coding
ALL_peak_109099	NO	YES	chr8	24420109	24420441	chr8.24420109	+	7.62748	NA	Intergenic	(CA)n|Simple_repeat|Simple_repeat	18671	NM_026931	69068	Mm.25775	NM_026931		1810011O10Rik	1110065B09Rik|AW121743|AW321058	RIKEN cDNA 1810011O10 gene	protein-coding
ALL_peak_91887	NO	YES	chr5	124450912	124451169	chr5.124450912	+	7.61892	NA	intron (NM_001310723, intron 3 of 6)	(TG)n|Simple_repeat|Simple_repeat	4336	NM_001310727	67956	Mm.137966	NM_030241	ENSMUSG00000049327	Setd8	2410195B05Rik|AA617402|AW536475|PR-SET7|PR/SET07	SET domain containing (lysine methyltransferase) 8	protein-coding
ALL_peak_68495	NO	YES	chr2	144165207	144165430	chr2.144165207	+	7.61892	NA	Intergenic	(CA)n|Simple_repeat|Simple_repeat	23972	NM_001033778	433481	Mm.330630	NM_001033778		Gm5535	EG433481	predicted gene 5535	protein-coding
ALL_peak_51723	NO	YES	chr17	45808851	45809245	chr17.45808851	+	7.61892	NA	Intergenic	Intergenic	-75204	NM_028164	72240	Mm.482897	NM_028164	ENSMUSG00000094690	1600014C23Rik	-	RIKEN cDNA 1600014C23 gene	protein-coding
ALL_peak_117396	NO	YES	chr9	57708791	57709063	chr9.57708791	+	7.61892	NA	intron (NM_153799, intron 1 of 6)	CpG	358	NM_153799	353190	Mm.268104	NM_153799		Edc3	AA517853|Lsm16|Yjdc	enhancer of mRNA decapping 3 homolog (S. cerevisiae)	protein-coding
ALL_peak_94335	NO	YES	chr6	17211160	17211423	chr6.17211160	+	7.61892	NA	Intergenic	(CA)n|Simple_repeat|Simple_repeat	13184	NR_102304	319682	Mm.136046	NR_102304	ENSMUSG00000085171	D830026I12Rik	-	RIKEN cDNA D830026I12 gene	ncRNA
ALL_peak_20802	NO	YES	chr11	94595982	94596338	chr11.94595982	+	7.61892	NA	intron (NM_153807, intron 1 of 15)	(CA)n|Simple_repeat|Simple_repeat	5626	NM_153807	264895	Mm.386885	NM_153807	ENSMUSG00000076435	Acsf2	-	acyl-CoA synthetase family member 2	protein-coding
ALL_peak_11683	NO	YES	chr10	43657305	43657549	chr10.43657305	+	7.61892	NA	Intergenic	(CA)n|Simple_repeat|Simple_repeat	64000	NR_033558	414125	Mm.244305	NR_033558	ENSMUSG00000075184	F830002L21Rik	F930017D23Rik	RIKEN cDNA F830002L21 gene	ncRNA
ALL_peak_25754	NO	YES	chr12	69475247	69475477	chr12.69475247	+	7.61236	NA	intron (NR_038060, intron 1 of 4)	(CA)n|Simple_repeat|Simple_repeat	188	NR_038061	76062	Mm.380755	NR_038060		5830428M24Rik	100040862|Gm3007	RIKEN cDNA 5830428M24 gene	ncRNA
ALL_peak_30715	NO	YES	chr13	51844977	51845200	chr13.51844977	+	7.60569	NA	Intergenic	(TC)n|Simple_repeat|Simple_repeat	-1587	NM_011817	23882	Mm.281298	NM_011817	ENSMUSG00000021453	Gadd45g	AI327420|C86281|CR6|DDIT2|OIG37	growth arrest and DNA-damage-inducible 45 gamma	protein-coding
ALL_peak_49849	NO	YES	chr17	7074653	7074953	chr17.7074653	+	7.60288	NA	intron (NM_001033442, intron 2 of 3)	(TG)n|Simple_repeat|Simple_repeat	49260	NM_001033442	381059	Mm.490353	NM_001033442		Gm1604b	ENSMUSG00000073470|Gm1604	predicted gene 1604b	protein-coding
ALL_peak_1585	NO	YES	chr1	37567406	37567744	chr1.37567406	+	7.57982	NA	Intergenic	(CA)n|Simple_repeat|Simple_repeat	-26559	NM_173870	269181	Mm.25861	NM_173870	ENSMUSG00000026110	Mgat4a	9530018I07Rik|GnT-IVa|glcNAc-T-IVa	mannoside acetylglucosaminyltransferase 4, isoenzyme A	protein-coding
ALL_peak_92466	NO	YES	chr5	134313583	134313855	chr5.134313583	+	7.56232	NA	intron (NM_001080746, intron 1 of 34)	CpG	1041	NM_001080749	14886	Mm.261570	NM_010365	ENSMUSG00000060261	Gtf2i	6030441I21Rik|BAP-135|Diws1t|GtfII-I|Spin|TFII-I|WBSCR6	general transcription factor II I	protein-coding
ALL_peak_95491	NO	YES	chr6	41250489	41250743	chr6.41250489	+	7.56232	NA	Intergenic	(TG)n|Simple_repeat|Simple_repeat	-51656	NM_011646	22074	Mm.383263	NM_011646	ENSMUSG00000054106	Try4	0910001B19Rik|Td	trypsin 4	protein-coding
ALL_peak_111545	NO	YES	chr8	70152775	70153055	chr8.70152775	+	7.56232	NA	intron (NM_001045484, intron 1 of 8)	(TG)n|Simple_repeat|Simple_repeat	154	NM_001045484	17259	Mm.432505	NM_008578	ENSMUSG00000002345	Mef2b	AI451606	myocyte enhancer factor 2B	protein-coding
ALL_peak_32753	NO	YES	chr13	98299255	98299542	chr13.98299255	+	7.56232	NA	Intergenic	(TC)n|Simple_repeat|Simple_repeat	17569	NM_145455	218490	Mm.371688	NM_145455	ENSMUSG00000021660	Btf3	1700054E11Rik	basic transcription factor 3	protein-coding
ALL_peak_117530	NO	YES	chr9	60364843	60365095	chr9.60364843	+	7.56232	NA	intron (NM_001040426, intron 6 of 17)	(TG)n|Simple_repeat|Simple_repeat	146066	NM_001040426	207596	Mm.28791	NM_172444	ENSMUSG00000032289	Thsd4	ADAMTSL-6|ADAMTSL6|AI585901|Adamtsl4|B230114P05Rik	thrombospondin, type I, domain containing 4	protein-coding
ALL_peak_22368	NO	YES	chr11	119212483	119212761	chr11.119212483	+	7.56232	NA	intron (NM_172443, intron 1 of 11)	intron (NM_172443, intron 1 of 11)	15877	NM_172443	207592	Mm.205263	NM_172443	ENSMUSG00000039976	Tbc1d16	B930087K01|BC026530|Tcd1d16	TBC1 domain family, member 16	protein-coding
ALL_peak_88754	NO	YES	chr5	66075415	66075614	chr5.66075415	+	7.56232	NA	intron (NM_001291226, intron 2 of 5)	(CA)n|Simple_repeat|Simple_repeat	22665	NM_139065	245945	Mm.36863	NM_139065	ENSMUSG00000070780	Rbm47	9530077J19Rik	RNA binding motif protein 47	protein-coding
ALL_peak_55175	NO	YES	chr18	20953990	20954286	chr18.20953990	+	7.56232	NA	intron (NM_026301, intron 1 of 5)	(CA)n|Simple_repeat|Simple_repeat	9513	NM_026301	67664	Mm.45980	NM_026301	ENSMUSG00000033107	Rnf125	4930553F04Rik	ring finger protein 125	protein-coding
ALL_peak_74105	NO	YES	chr3	79567817	79568228	chr3.79567817	+	7.56232	NA	promoter-TSS (NM_001162999)	promoter-TSS (NM_001162999)	-343	NM_001162999	329679	Mm.244005	NM_001162999	ENSMUSG00000061175	Fnip2	D630023B12Rik|mKIAA1450	folliculin interacting protein 2	protein-coding
ALL_peak_61412	NO	YES	chr19	57101455	57101671	chr19.57101455	+	7.56232	NA	intron (NM_001290813, intron 6 of 20)	(CA)n|Simple_repeat|Simple_repeat	17461	NM_001103178	226251	Mm.217161	NM_178688	ENSMUSG00000025085	Ablim1	2210411C18Rik|2610209L21Rik|4833406P10Rik|9330196J19Rik|AV079770|AW060987|AW215784|Limab1|mKIAA0059	actin-binding LIM protein 1	protein-coding
ALL_peak_11637	NO	YES	chr10	42752133	42752401	chr10.42752133	+	7.56232	NA	Intergenic	(TG)n|Simple_repeat|Simple_repeat	-9229	NM_153055	140740	Mm.214344	NM_153055	ENSMUSG00000019802	Sec63	5730478J10Rik|AI649014|AW319215	SEC63-like (S. cerevisiae)	protein-coding
ALL_peak_34416	NO	YES	chr14	12099451	12099768	chr14.12099451	+	7.56232	NA	intron (NM_008981, intron 6 of 29)	(TG)n|Simple_repeat|Simple_repeat	-184594	NM_001284383	218734	Mm.44068	NM_146051	ENSMUSG00000033111	3830406C13Rik	-	RIKEN cDNA 3830406C13 gene	protein-coding
ALL_peak_13579	NO	YES	chr10	80955287	80955634	chr10.80955287	+	7.56232	NA	intron (NM_010319, intron 2 of 3)	intron (NM_010319, intron 2 of 3)	25369	NM_008655	17873	Mm.1360	NM_008655	ENSMUSG00000015312	Gadd45b	AI323528|Myd118	growth arrest and DNA-damage-inducible 45 beta	protein-coding
ALL_peak_61897	NO	YES	chr2	5677273	5677526	chr2.5677273	+	7.56232	NA	intron (NM_177343, intron 1 of 10)	(TG)n|Simple_repeat|Simple_repeat	-1353	NM_001290376	227541	Mm.191949	NM_177343	ENSMUSG00000039145	Camk1d	A630059D12Rik|CKLiK|CaMKIdelta|E030025C11Rik|mCKLiK	calcium/calmodulin-dependent protein kinase ID	protein-coding
ALL_peak_49234	NO	YES	chr16	92040142	92040416	chr16.92040142	+	7.56232	NA	Intergenic	(CA)n|Simple_repeat|Simple_repeat	-18043	NM_017391	53881	Mm.217354	NM_017391	ENSMUSG00000089774	Slc5a3	AA623876|BF642829|Smit1	solute carrier family 5 (inositol transporters), member 3	protein-coding
ALL_peak_84832	NO	YES	chr4	138825614	138825875	chr4.138825614	+	7.56232	NA	intron (NM_001122954, intron 1 of 5)	(TC)n|Simple_repeat|Simple_repeat	-6113	NR_002926	18780	Mm.4675	NM_011108	ENSMUSG00000058908	Pla2g2a	EF|Mom1|Pla2|sPLA2|sPla2-IIA	phospholipase A2, group IIA (platelets, synovial fluid)	protein-coding
ALL_peak_101325	NO	YES	chr7	6286493	6286860	chr7.6286493	+	7.56232	NA	promoter-TSS (NM_001024928)	promoter-TSS (NM_001024928)	96	NM_001024928	384763	Mm.276279	NM_001024928	ENSMUSG00000054893	Zfp667	A830025F02Rik|Mip1|ZNF667	zinc finger protein 667	protein-coding
ALL_peak_33391	NO	YES	chr13	109902639	109902972	chr13.109902639	+	7.56232	NA	intron (NM_011056, intron 7 of 16)	CpG	-1004	NR_035442	100316683		NR_035442	ENSMUSG00000084651	Mir1904	Mirn1904|mmu-mir-1904	microRNA 1904	ncRNA
ALL_peak_38677	NO	YES	chr14	99851403	99851627	chr14.99851403	+	7.55801	NA	Intergenic	(TC)n|Simple_repeat|Simple_repeat	298281	NM_010636	16597	Mm.396499	NM_010636		Klf12	2700063E05Rik|AI225908|AI315654|AP-2rep|B130052C06Rik|D530033K05Rik	Kruppel-like factor 12	protein-coding
ALL_peak_114157	NO	YES	chr8	117701251	117701861	chr8.117701251	+	7.55801	NA	promoter-TSS (NM_008290)	promoter-TSS (NM_008290)	-390	NM_008290	15486	Mm.276466	NM_008290	ENSMUSG00000031844	Hsd17b2	AI194836|AI194967|AI255511	hydroxysteroid (17-beta) dehydrogenase 2	protein-coding
ALL_peak_108105	NO	YES	chr8	4211881	4212895	chr8.4211881	+	7.54345	NA	intron (NM_207203, intron 6 of 6)	(GGAGA)n|Simple_repeat|Simple_repeat	4924	NM_207203	73072	Mm.477379	NM_207203	ENSMUSG00000064125	Prr36	-	proline rich 36	protein-coding
ALL_peak_53858	NO	YES	chr17	84894115	84894365	chr17.84894115	+	7.54345	NA	Intergenic	IMPB_01|Satellite|Satellite	-62501	NM_001159497	19043	Mm.249695	NM_011151	ENSMUSG00000061130	Ppm1b	PP2CB	protein phosphatase 1B, magnesium dependent, beta isoform	protein-coding
ALL_peak_63159	NO	YES	chr2	30556662	30557415	chr2.30556662	+	7.50388	NA	Intergenic	(TG)n|Simple_repeat|Simple_repeat	-38006	NM_030137	78617	Mm.40413	NM_030137	ENSMUSG00000047363	Cstad	9530039B02Rik	CSA-conditional, T cell activation-dependent protein	protein-coding
ALL_peak_91484	NO	YES	chr5	118449074	118449331	chr5.118449074	+	7.50388	NA	Intergenic	(TG)n|Simple_repeat|Simple_repeat	-111517	NM_172424	76199	Mm.206238	NM_172424	ENSMUSG00000018076	Med13l	2210413I17Rik|6330591G05Rik|9030618F05Rik|Thrap2|Trap240L|mKIAA1025	mediator complex subunit 13-like	protein-coding
ALL_peak_60370	NO	YES	chr19	37895725	37896073	chr19.37895725	+	7.50388	NA	Intergenic	(CA)n|Simple_repeat|Simple_repeat	147678	NM_001099634	226101	Mm.34674	NM_177035	ENSMUSG00000048612	Myof	2310004N10Rik|2310051D19Rik|E030042N20Rik|Fer1l3	myoferlin	protein-coding
ALL_peak_2576	NO	YES	chr1	58795046	58795364	chr1.58795046	+	7.50388	NA	promoter-TSS (NM_009812)	promoter-TSS (NM_009812)	-169	NM_009812	12370	Mm.336851	NM_009812	ENSMUSG00000026029	Casp8	CASP-8|FLICE|MACH|Mch5	caspase 8	protein-coding
ALL_peak_53579	NO	YES	chr17	80127153	80127437	chr17.80127153	+	7.50388	NA	promoter-TSS (NM_176963)	promoter-TSS (NM_176963)	-176	NM_176963	319625	Mm.29098	NM_176963	ENSMUSG00000035473	Galm	A530057M15Rik|AU015645|AU020959	galactose mutarotase	protein-coding
ALL_peak_95987	NO	YES	chr6	51208875	51209155	chr6.51208875	+	7.47621	NA	Intergenic	GA-rich|Low_complexity|Low_complexity	60895	NR_029719	387166		NR_029719	ENSMUSG00000065505	Mir148a	Mirn148|Mirn148a|mir-148a	microRNA 148a	ncRNA
ALL_peak_34400	NO	YES	chr14	11570006	11570452	chr14.11570006	+	7.47621	NA	intron (NM_008981, intron 1 of 29)	(CA)n|Simple_repeat|Simple_repeat	16676	NM_008981	19270	Mm.431266	NM_008981	ENSMUSG00000021745	Ptprg	5430405N12Rik|AW046354|AW549872|RPTPgamma	protein tyrosine phosphatase, receptor type, G	protein-coding
ALL_peak_92624	NO	YES	chr5	136480315	136480598	chr5.136480315	+	7.46125	NA	intron (NM_198602, intron 2 of 22)	(TC)n|Simple_repeat|Simple_repeat	85525	NM_001291239	13047	Mm.320317	NM_009986	ENSMUSG00000029705	Cux1	CDP|Cutl1|Cux|Cux-1	cut-like homeobox 1	protein-coding
ALL_peak_52329	NO	YES	chr17	56506952	56507191	chr17.56506952	+	7.46125	NA	Intergenic	(TG)n|Simple_repeat|Simple_repeat	5412	NM_011483	20834	Mm.76862	NM_011483	ENSMUSG00000044526	Znrf4	1700094M01Rik|Ssrzf1|spzn	zinc and ring finger 4	protein-coding
ALL_peak_10580	NO	YES	chr10	20284762	20285301	chr10.20284762	+	7.46125	NA	Intergenic	(TG)n|Simple_repeat|Simple_repeat	12657	NR_105840	102466647		NR_105840	ENSMUSG00000098887	Mir6413	Gm27432|mmu-mir-6413	microRNA 6413	ncRNA
ALL_peak_96901	NO	YES	chr6	71487801	71488080	chr6.71487801	+	7.4611	NA	Intergenic	(CA)n|Simple_repeat|Simple_repeat	-5937	NM_009543	22644	Mm.422969	NM_009543	ENSMUSG00000052656	Rnf103	AW146237|AW212918|Zfp103|kf-1	ring finger protein 103	protein-coding
ALL_peak_49779	NO	YES	chr17	5572264	5572511	chr17.5572264	+	7.43731	NA	intron (NM_146073, intron 1 of 8)	(CA)n|Simple_repeat|Simple_repeat	79787	NM_146073	224454	Mm.487663	NM_146073	ENSMUSG00000034265	Zdhhc14	B530001K09Rik|New1cp	zinc finger, DHHC domain containing 14	protein-coding
ALL_peak_111445	NO	YES	chr8	68037748	68038024	chr8.68037748	+	7.43731	NA	Intergenic	(TG)n|Simple_repeat|Simple_repeat	-63312	NM_177698	234353	Mm.32525	NM_027626	ENSMUSG00000030465	Psd3	4931420C21Rik|AI661273|BC003498|D430018P08|EFA6D	pleckstrin and Sec7 domain containing 3	protein-coding
ALL_peak_118411	NO	YES	chr9	74909996	74910223	chr9.74909996	+	7.43731	NA	Intergenic	(TG)n|Simple_repeat|Simple_repeat	-42944	NM_001113283	235493	Mm.208955	NM_153584	ENSMUSG00000034858	Fam214a	6330415I01Rik|AI553555|C130047D21Rik|Kiaa1370|mKIAA1370	family with sequence similarity 214, member A	protein-coding
ALL_peak_10652	NO	YES	chr10	21686676	21686974	chr10.21686676	+	7.43731	NA	Intergenic	(TG)n|Simple_repeat|Simple_repeat	-4020	NR_045843	432436	Mm.244553	NM_001004162		Gm5420	EG432436	predicted gene 5420	ncRNA
ALL_peak_33041	NO	YES	chr13	102857049	102857253	chr13.102857049	+	7.43731	NA	intron (NM_175171, intron 4 of 28)	(CA)n|Simple_repeat|Simple_repeat	96896	NR_130171	76624	Mm.426384	NR_130171	ENSMUSG00000091906	1700099I09Rik	-	RIKEN cDNA 1700099I09 gene	ncRNA
ALL_peak_33937	NO	YES	chr13	119429673	119429914	chr13.119429673	+	7.43731	NA	intron (NM_145457, intron 1 of 10)	(GA)n|Simple_repeat|Simple_repeat	891	NM_145457	218693	Mm.490243	NM_145457	ENSMUSG00000025451	Paip1	PAIP-1	polyadenylate binding protein-interacting protein 1	protein-coding
ALL_peak_19020	NO	YES	chr11	60976671	60976887	chr11.60976671	+	7.40013	NA	Intergenic	(CA)n|Simple_repeat|Simple_repeat	44722	NM_008928	26397	Mm.18494	NM_008928	ENSMUSG00000018932	Map2k3	AW212142|MEK3|MKK3|Prkmk3|mMKK3b	mitogen-activated protein kinase kinase 3	protein-coding
ALL_peak_105791	NO	YES	chr7	100410739	100411116	chr7.100410739	+	7.40013	NA	intron (NM_001017985, intron 12 of 32)	PB1D10|SINE|Alu	38694	NM_001017985	277939	Mm.276374	NM_001017985	ENSMUSG00000047248	C2cd3	AU020772	C2 calcium-dependent domain containing 3	protein-coding
ALL_peak_75561	NO	YES	chr3	108880411	108880648	chr3.108880411	+	7.32589	NA	intron (NM_177091, intron 4 of 12)	(CA)n|Simple_repeat|Simple_repeat	9479	NM_177091	320181	Mm.244233	NM_177091	ENSMUSG00000045326	Fndc7	E230011A21Rik	fibronectin type III domain containing 7	protein-coding
ALL_peak_21298	NO	YES	chr11	102217403	102217641	chr11.102217403	+	7.32589	NA	intron (NM_001284249, intron 3 of 27)	intron (NM_001284249, intron 3 of 27)	12628	NR_106179	102465892		NR_106179	ENSMUSG00000098863	Mir8101	Gm27705|mmu-mir-8101	microRNA 8101	ncRNA
ALL_peak_21626	NO	YES	chr11	108304052	108304276	chr11.108304052	+	7.32589	NA	intron (NM_011101, intron 2 of 16)	(CA)n|Simple_repeat|Simple_repeat	39724	NM_011101	18750	Mm.222178	NM_011101	ENSMUSG00000050965	Prkca	AI875142|Pkca	protein kinase C, alpha	protein-coding
ALL_peak_12390	NO	YES	chr10	59570358	59570571	chr10.59570358	+	7.32589	NA	intron (NM_001033259, intron 1 of 7)	(CA)n|Simple_repeat|Simple_repeat	46228	NM_001033259	215999	Mm.296470	NM_001033259	ENSMUSG00000009647	Mcu	2010012O16Rik|AV064928|C10orf42|Ccdc109a|D130073L02Rik|Gm64	mitochondrial calcium uniporter	protein-coding
ALL_peak_10527	NO	YES	chr10	19044248	19044542	chr10.19044248	+	7.32589	NA	Intergenic	(TC)n|Simple_repeat|Simple_repeat	-28985	NM_009397	21929	Mm.116683	NM_009397	ENSMUSG00000019850	Tnfaip3	A20|Tnfip3	tumor necrosis factor, alpha-induced protein 3	protein-coding
ALL_peak_81961	NO	YES	chr4	82386405	82386780	chr4.82386405	+	7.32589	NA	intron (NM_001286131, intron 2 of 9)	(TC)n|Simple_repeat|Simple_repeat	119187	NM_001286131	18028	Mm.317947	NM_008687	ENSMUSG00000008575	Nfib	6720429L07Rik|CTF|E030026I10Rik|NF-I/B|NF1-B|NFI-B	nuclear factor I/B	protein-coding
ALL_peak_97750	NO	YES	chr6	86234161	86234583	chr6.86234161	+	7.32589	NA	intron (NM_031199, intron 2 of 5)	intron (NM_031199, intron 2 of 5)	39145	NM_031199	21802	Mm.137222	NM_031199	ENSMUSG00000029999	Tgfa	wa-1|wa1	transforming growth factor alpha	protein-coding
ALL_peak_11524	NO	YES	chr10	40712986	40713227	chr10.40712986	+	7.32589	NA	intron (NM_177793, intron 1 of 4)	intron (NM_177793, intron 1 of 4)	29824	NM_177793	327747	Mm.80407	NM_177793	ENSMUSG00000045555	Mettl24	9030224M15Rik	methyltransferase like 24	protein-coding
ALL_peak_2567	NO	YES	chr1	58712001	58712257	chr1.58712001	+	7.31024	NA	intron (NM_001289704, intron 1 of 9)	(TC)n|Simple_repeat|Simple_repeat	638	NM_001293804	12633	Mm.336848	NM_009805	ENSMUSG00000026031	Cflar	2310024N18Rik|A430105C05Rik|CLARP|Cash|Casper|ENSMUSG00000072980|FLAME|FLAME-1|Flip|Gm9845|I-FLICE|MRIT|c-Flip	CASP8 and FADD-like apoptosis regulator	protein-coding
ALL_peak_96715	NO	YES	chr6	67029134	67029370	chr6.67029134	+	7.31024	NA	Intergenic	(TG)n|Simple_repeat|Simple_repeat	-7347	NR_040278	320172	Mm.449039	NR_040278	ENSMUSG00000087231	E230016M11Rik	-	RIKEN cDNA E230016M11 gene	ncRNA
ALL_peak_4963	NO	YES	chr1	105906752	105907016	chr1.105906752	+	7.31024	NA	Intergenic	(TG)n|Simple_repeat|Simple_repeat	-83522	NM_001122676	227449	Mm.210188	NM_001122675	ENSMUSG00000038866	Zcchc2	9930114B20Rik|AW212015	zinc finger, CCHC domain containing 2	protein-coding
ALL_peak_102140	NO	YES	chr7	24904912	24905133	chr7.24904912	+	7.31024	NA	intron (NM_001130152, intron 1 of 28)	(CA)n|Simple_repeat|Simple_repeat	676	NM_001130152	16801	Mm.3181	NM_008488	ENSMUSG00000040940	Arhgef1	Lbcl2|Lsc	Rho guanine nucleotide exchange factor (GEF) 1	protein-coding
ALL_peak_12817	NO	YES	chr10	66945930	66946255	chr10.66945930	+	7.31024	NA	Intergenic	(CA)n|Simple_repeat|Simple_repeat	-58983	NR_110511	102634101	Mm.445258	NR_110511		Gm31763	-	predicted gene, 31763	ncRNA
ALL_peak_84192	NO	YES	chr4	128977096	128977358	chr4.128977096	+	7.31024	NA	Intergenic	(CA)n|Simple_repeat|Simple_repeat	-14772	NM_172875	242669	Mm.215814	NM_172875	ENSMUSG00000028789	Azin2	4933429I20Rik|Adc|Azi2|B930082O19|ODC-p|Odcp	antizyme inhibitor 2	protein-coding
ALL_peak_95974	NO	YES	chr6	51059688	51059990	chr6.51059688	+	7.31024	NA	Intergenic	(GA)n|Simple_repeat|Simple_repeat	210071	NR_029719	387166		NR_029719	ENSMUSG00000065505	Mir148a	Mirn148|Mirn148a|mir-148a	microRNA 148a	ncRNA
ALL_peak_119971	NO	YES	chr9	106202629	106202857	chr9.106202629	+	7.31024	NA	promoter-TSS (NM_011876)	promoter-TSS (NM_011876)	-365	NM_011876	23999	Mm.274346	NM_011876	ENSMUSG00000023277	Twf2	A6-related|AU014993|Ptk9l|Ptk9r	twinfilin, actin-binding protein, homolog 2 (Drosophila)	protein-coding
ALL_peak_75227	NO	YES	chr3	102204733	102204978	chr3.102204733	+	7.31024	NA	promoter-TSS (NM_177545)	promoter-TSS (NM_177545)	-162	NM_177545	229658	Mm.118004	NM_177545		Vangl1	Kitenin|Lpp2|Stb2|Stbm	vang-like 1 (van gogh, Drosophila)	protein-coding
ALL_peak_84303	NO	YES	chr4	130630214	130630449	chr4.130630214	+	7.31024	NA	Intergenic	(TG)n|Simple_repeat|Simple_repeat	-33028	NM_001159604	80912	Mm.440206	NM_030722	ENSMUSG00000028580	Pum1	AA517475|Pumm|mKIAA0099	pumilio RNA-binding family member 1	protein-coding
ALL_peak_83651	NO	YES	chr4	119131014	119131226	chr4.119131014	+	7.31024	NA	intron (NM_011400, intron 2 of 9)	(TG)n|Simple_repeat|Simple_repeat	22375	NM_011400	20525	Mm.21002	NM_011400		Slc2a1	Glut-1|Glut1	solute carrier family 2 (facilitated glucose transporter), member 1	protein-coding
ALL_peak_94961	NO	YES	chr6	29768227	29768508	chr6.29768227	+	7.31024	NA	promoter-TSS (NM_021414)	promoter-TSS (NM_021414)	-76	NM_021414	74340	Mm.210899	NM_021414	ENSMUSG00000029772	Ahcyl2	4631427C17Rik|AI227036|Adohcyase3|mKIAA0828	S-adenosylhomocysteine hydrolase-like 2	protein-coding
ALL_peak_30970	NO	YES	chr13	56450151	56450450	chr13.56450151	+	7.31024	NA	intron (NM_177809, intron 3 of 7)	intron (NM_177809, intron 3 of 7)	11945	NM_177809	328258	Mm.482177	NM_177809		Slc25a48	AU042651|E230025K15	solute carrier family 25, member 48	protein-coding
ALL_peak_7489	NO	YES	chr1	152916829	152917073	chr1.152916829	+	7.31024	NA	Intergenic	(TG)n|Simple_repeat|Simple_repeat	-14305	NM_001160256	226517	Mm.270775	NM_001005507	ENSMUSG00000042772	Smg7	9430023P16Rik|mKIAA0250	Smg-7 homolog, nonsense mediated mRNA decay factor (C. elegans)	protein-coding
ALL_peak_46977	NO	YES	chr16	46849394	46849601	chr16.46849394	+	7.31024	NA	Intergenic	(CA)n|Simple_repeat|Simple_repeat	-352530	NM_021497	58998	Mm.328072	NM_021495	ENSMUSG00000022656	Pvrl3	2610301B19Rik|3000002N23Rik|4921513D19Rik|AA407785|AU016832|AW538082|CD113	poliovirus receptor-related 3	protein-coding
ALL_peak_95312	NO	YES	chr6	37629963	37630280	chr6.37629963	+	7.31024	NA	Intergenic	(TG)n|Simple_repeat|Simple_repeat	99948	NM_145364	208665	Mm.262635	NM_145364	ENSMUSG00000038641	Akr1d1	-	aldo-keto reductase family 1, member D1	protein-coding
ALL_peak_809	NO	YES	chr1	21243955	21244167	chr1.21243955	+	7.31024	NA	intron (NM_001288617, intron 1 of 7)	(TG)n|Simple_repeat|Simple_repeat	3476	NM_001077353	14859	Mm.394593	NM_010356	ENSMUSG00000025934	Gsta3	Gst2-3	glutathione S-transferase, alpha 3	protein-coding
ALL_peak_121626	NO	YES	chrX	48453026	48453231	chrX.48453026	+	7.31024	NA	intron (NM_019680, intron 1 of 8)	CpG	10004	NM_019680	56501	Mm.36808	NM_019680	ENSMUSG00000031103	Elf4	AV314029|BC042423|ENSMUSG00000053512|Gm9907|Mef	E74-like factor 4 (ets domain transcription factor)	protein-coding
ALL_peak_11588	NO	YES	chr10	42089313	42089543	chr10.42089313	+	7.31024	NA	Intergenic	Intergenic	-71046	NM_001034858	213402	Mm.211320	NM_001034858	ENSMUSG00000071324	Armc2	2610018I05Rik	armadillo repeat containing 2	protein-coding
ALL_peak_114546	NO	YES	chr8	123784047	123784457	chr8.123784047	+	7.31024	NA	Intergenic	(TG)n|Simple_repeat|Simple_repeat	-21744	NM_009003	19341	Mm.9221	NM_009003	ENSMUSG00000019478	Rab4a	AI848268|Rab4	RAB4A, member RAS oncogene family	protein-coding
ALL_peak_19634	NO	YES	chr11	73281895	73282456	chr11.73281895	+	7.31024	NA	intron (NM_145099, intron 7 of 17)	intron (NM_145099, intron 7 of 17)	14555	NM_145099	246788	Mm.75196	NM_145099	ENSMUSG00000043029	Trpv3	1110036I10Rik|AI644701|Nh|VRL3	transient receptor potential cation channel, subfamily V, member 3	protein-coding
ALL_peak_59649	NO	YES	chr19	24528641	24528907	chr19.24528641	+	7.31024	NA	intron (NM_008846, intron 1 of 14)	(TG)n|Simple_repeat|Simple_repeat	27053	NM_008846	18719	Mm.217214	NM_008846	ENSMUSG00000024867	Pip5k1b	PI4P5K-I[b]|PIP5K1-beta|PIP5KIbeta|Pipk5b|STM7	phosphatidylinositol-4-phosphate 5-kinase, type 1 beta	protein-coding
ALL_peak_97593	NO	YES	chr6	83457676	83457895	chr6.83457676	+	7.31024	NA	Intergenic	(TG)n|Simple_repeat|Simple_repeat	16030	NR_028382	320775	Mm.434334	NR_028382	ENSMUSG00000051844	B230319C09Rik	-	RIKEN cDNA B230319C09 gene	ncRNA
ALL_peak_42717	NO	YES	chr15	61609141	61609357	chr15.61609141	+	7.31024	NA	Intergenic	(TC)n|Simple_repeat|Simple_repeat	165202	NR_040350	432956	Mm.404918	NR_040350		D030024E09Rik	-	RIKEN cDNA D030024E09 gene	ncRNA
ALL_peak_3602	NO	YES	chr1	79640638	79640940	chr1.79640638	+	7.31024	NA	intron (NM_183027, intron 1 of 4)	intron (NM_183027, intron 1 of 4)	31183	NM_183027	252903	Mm.32409	NM_183027	ENSMUSG00000054702	Ap1s3	1190009B22|Jr2|[s]3A	adaptor-related protein complex AP-1, sigma 3	protein-coding
ALL_peak_108575	NO	YES	chr8	13650769	13650962	chr8.13650769	+	7.31024	NA	intron (NM_009025, intron 1 of 23)	(CA)n|Simple_repeat|Simple_repeat	26722	NM_009025	19414	Mm.18517	NM_009025	ENSMUSG00000031453	Rasa3	AI326412|C86362|E130011G04|GAPIII|scat	RAS p21 protein activator 3	protein-coding
ALL_peak_78774	NO	YES	chr4	14922199	14922428	chr4.14922199	+	7.31024	NA	Intergenic	(TG)n|Simple_repeat|Simple_repeat	-8328	NM_001243100	100038514	Mm.331495	NM_001243100		Gm11837	OTTMUSG00000004551	predicted gene 11837	protein-coding
ALL_peak_91928	NO	YES	chr5	125368524	125368831	chr5.125368524	+	7.31024	NA	Intergenic	MT2B|LTR|ERVL	21340	NM_019639	22190	Mm.331	NM_019639	ENSMUSG00000008348	Ubc	2700054O04Rik|AI194771|Rps27a|TI-225|Uba52|Ubb	ubiquitin C	protein-coding
ALL_peak_8868	NO	YES	chr1	179559730	179559972	chr1.179559730	+	7.31024	NA	intron (NM_146105, intron 1 of 10)	(TG)n|Simple_repeat|Simple_repeat	13322	NM_146105	226744	Mm.87662	NM_146105	ENSMUSG00000038949	Cnst	9630058J23Rik	consortin, connexin sorting protein	protein-coding
ALL_peak_113463	NO	YES	chr8	106588388	106588618	chr8.106588388	+	7.31024	NA	intron (NR_045470, intron 1 of 2)	(CA)n|Simple_repeat|Simple_repeat	1360	NR_045470	68692	Mm.416843	NR_045470	ENSMUSG00000099139	1110028F18Rik	-	RIKEN cDNA 1110028F18 gene	ncRNA
ALL_peak_53469	NO	YES	chr17	78205418	78206201	chr17.78205418	+	7.31024	NA	intron (NM_015800, intron 1 of 16)	(TG)n|Simple_repeat|Simple_repeat	5561	NM_015800	50766	Mm.311912	NM_015800	ENSMUSG00000024074	Crim1	AU015004	cysteine rich transmembrane BMP regulator 1 (chordin like)	protein-coding
ALL_peak_5002	NO	YES	chr1	106700182	106700509	chr1.106700182	+	7.31024	NA	intron (NM_009741, intron 1 of 1)	intron (NM_009741, intron 1 of 1)	13945	NM_177410	12043	Mm.257460	NM_009741	ENSMUSG00000057329	Bcl2	AW986256|Bcl-2|C430015F12Rik|D630044D05Rik|D830018M01Rik	B cell leukemia/lymphoma 2	protein-coding
ALL_peak_55156	NO	YES	chr18	20718546	20718803	chr18.20718546	+	7.31024	NA	intron (NM_019737, intron 3 of 8)	(CA)n|Simple_repeat|Simple_repeat	27730	NM_019737	56386	Mm.393827	NM_019737	ENSMUSG00000056124	B4galt6	AA536803|AU022389	UDP-Gal:betaGlcNAc beta 1,4-galactosyltransferase, polypeptide 6	protein-coding
ALL_peak_22542	NO	YES	chr12	4039076	4039332	chr12.4039076	+	7.31024	NA	promoter-TSS (NM_001082483)	promoter-TSS (NM_001082483)	-289	NM_001082483	668212	Mm.210266	NM_001082483	ENSMUSG00000020658	Efr3b	AI852640|C030014M07Rik|mKIAA0953	EFR3 homolog B (S. cerevisiae)	protein-coding
ALL_peak_71714	NO	YES	chr3	30421457	30422067	chr3.30421457	+	7.31024	NA	intron (NM_021442, intron 1 of 2)	intron (NM_021442, intron 1 of 2)	87725	NM_021442	14013	Mm.56965	NM_007963	ENSMUSG00000027684	Mecom	D630039M04Rik|Evi-1|Evi1|Jbo|Mds|Mds1|Mds1-Evi1|Prdm3|Znfpr1b1	MDS1 and EVI1 complex locus	protein-coding
ALL_peak_12835	NO	YES	chr10	67085749	67085971	chr10.67085749	+	7.31024	NA	intron (NM_178606, intron 1 of 7)	intron (NM_178606, intron 1 of 7)	11128	NM_178606	28193	Mm.41272	NM_178606	ENSMUSG00000019873	Reep3	D10Ucla1	receptor accessory protein 3	protein-coding
ALL_peak_78631	NO	YES	chr4	12016743	12016971	chr4.12016743	+	7.31024	NA	Intergenic	(TG)n|Simple_repeat|Simple_repeat	50283	NR_040577	100503636	Mm.209078	NR_040577		1700123M08Rik	1600025K15Rik	RIKEN cDNA 1700123M08 gene	ncRNA
ALL_peak_64532	NO	YES	chr2	60880704	60880906	chr2.60880704	+	7.31024	NA	intron (NM_020296, intron 1 of 13)	(CA)n|Simple_repeat|Simple_repeat	633	NM_001141931	56878	Mm.259667	NM_020296	ENSMUSG00000026970	Rbms1	2600014B10Rik|AI255215|MSSP-1|MSSP-2|MSSP-3|YC1	RNA binding motif, single stranded interacting protein 1	protein-coding
ALL_peak_108565	NO	YES	chr8	13338393	13338616	chr8.13338393	+	7.31024	NA	promoter-TSS (NM_001291765)	promoter-TSS (NM_001291765)	-247	NM_001291768	21781	Mm.925	NM_009361		Tfdp1	Dp1|Drtf1	transcription factor Dp 1	protein-coding
ALL_peak_66833	NO	YES	chr2	110229555	110229798	chr2.110229555	+	7.31024	NA	Intergenic	(CA)n|Simple_repeat|Simple_repeat	76049	NM_130452	170442	Mm.27335	NM_130452		Bbox1	AI874739	butyrobetaine (gamma), 2-oxoglutarate dioxygenase 1 (gamma-butyrobetaine hydroxylase)	protein-coding
ALL_peak_67063	NO	YES	chr2	115764319	115764541	chr2.115764319	+	7.31024	NA	intron (NM_001145898, intron 10 of 10)	intron (NM_001145898, intron 10 of 10)	125705	NR_035476	100316703		NR_035476	ENSMUSG00000088606	Mir1951	mir-1951|mmu-mir-1951	microRNA 1951	ncRNA
ALL_peak_85221	NO	YES	chr4	144921814	144922099	chr4.144921814	+	7.31024	NA	intron (NM_011303, intron 4 of 5)	(TG)n|Simple_repeat|Simple_repeat	28819	NM_011303	20148	Mm.14063	NM_011303	ENSMUSG00000066026	Dhrs3	Rsdr1|retSDR1	dehydrogenase/reductase (SDR family) member 3	protein-coding
ALL_peak_77643	NO	YES	chr3	149236562	149236795	chr3.149236562	+	7.31024	NA	Intergenic	(TG)n|Simple_repeat|Simple_repeat	-38059	NR_040591	381482	Mm.393866	NR_040591		Gm1653	-	predicted gene 1653	ncRNA
ALL_peak_69967	NO	YES	chr2	170281541	170281777	chr2.170281541	+	7.31024	NA	Intergenic	RLTR20A4|LTR|ERVK	-74702	NR_040610	73303	Mm.443297	NR_040610	ENSMUSG00000086999	Bcas1os2	1700040N02Rik	breast carcinoma amplified sequence 1, opposite strand 2	ncRNA
ALL_peak_118853	NO	YES	chr9	83609890	83610120	chr9.83609890	+	7.31024	NA	Intergenic	(CA)n|Simple_repeat|Simple_repeat	61667	NM_172507	212531	Mm.491246	NM_172507		Sh3bgrl2	A930014C21Rik|AA408038|B930089I21	SH3 domain binding glutamic acid-rich protein like 2	protein-coding
ALL_peak_69019	NO	YES	chr2	154648414	154648636	chr2.154648414	+	7.31024	NA	Intergenic	(TG)n|Simple_repeat|Simple_repeat	-8501	NM_029362	75608	Mm.262480	NM_029362	ENSMUSG00000038467	Chmp4b	2010012F05Rik|C76846|Snf7-2	charged multivesicular body protein 4B	protein-coding
ALL_peak_85480	NO	YES	chr4	149793860	149794066	chr4.149793860	+	7.31024	NA	Intergenic	(TG)n|Simple_repeat|Simple_repeat	-19696	NM_027460	70556	Mm.41877	NM_027460	ENSMUSG00000028982	Slc25a33	5730438N18Rik|Pnc1	solute carrier family 25, member 33	protein-coding
ALL_peak_105753	NO	YES	chr7	99535226	99535518	chr7.99535226	+	7.31024	NA	promoter-TSS (NM_178220)	promoter-TSS (NM_178220)	-114	NM_177231	109689	Mm.260193	NM_177231	ENSMUSG00000018909	Arrb1	1200006I17Rik|AW208571|G430100A01Rik	arrestin, beta 1	protein-coding
ALL_peak_6193	NO	YES	chr1	127248250	127248525	chr1.127248250	+	7.31024	NA	intron (NM_145128, intron 1 of 17)	B3|SINE|B2	43401	NM_145128	107895	Mm.214682	NM_145128	ENSMUSG00000036155	Mgat5	4930471A21Rik|5330407H02Rik|AI480971|GlcNAc-TV	mannoside acetylglucosaminyltransferase 5	protein-coding
ALL_peak_109957	NO	YES	chr8	40307176	40307459	chr8.40307176	+	7.31024	NA	promoter-TSS (NM_030110)	promoter-TSS (NM_030110)	612	NR_106126	102466237		NR_106126	ENSMUSG00000098431	Mir7666	Gm27915|mmu-mir-7666	microRNA 7666	ncRNA
ALL_peak_115275	NO	YES	chr9	13246763	13247011	chr9.13246763	+	7.31024	NA	promoter-TSS (NM_025534)	promoter-TSS (NM_025534)	-92	NM_025534	66396	Mm.290620	NM_025534		Ccdc82	2310043N13Rik	coiled-coil domain containing 82	protein-coding
ALL_peak_47433	NO	YES	chr16	55784713	55784972	chr16.55784713	+	7.31024	NA	Intergenic	(CA)n|Simple_repeat|Simple_repeat	37296	NM_001159394	80859	Mm.247272	NM_030612	ENSMUSG00000035356	Nfkbiz	AA408868|INAP|Mail	nuclear factor of kappa light polypeptide gene enhancer in B cells inhibitor, zeta	protein-coding
ALL_peak_96962	NO	YES	chr6	72624248	72624539	chr6.72624248	+	7.31024	NA	Intergenic	Intergenic	-4895	NR_040422	100038714	Mm.321330	NR_040421		Gm15401	ENSMUSG00000072999|OTTMUSG00000021199	predicted gene 15401	ncRNA
ALL_peak_1444	NO	YES	chr1	34738927	34739199	chr1.34738927	+	7.31024	NA	Intergenic	(CA)n|Simple_repeat|Simple_repeat	-62659	NM_183019	226970	Mm.41604	NM_183019	ENSMUSG00000037509	Arhgef4	9330140K16Rik|Asef|ENSMUSG00000070955	Rho guanine nucleotide exchange factor (GEF) 4	protein-coding
ALL_peak_51535	NO	YES	chr17	43076429	43076815	chr17.43076429	+	7.31024	NA	intron (NM_178589, intron 4 of 5)	B1_Mur2|SINE|Alu	60067	NM_178589	94185	Mm.200792	NM_178589	ENSMUSG00000023915	Tnfrsf21	AA959878|DR6|R74815|TR7	tumor necrosis factor receptor superfamily, member 21	protein-coding
ALL_peak_93383	NO	YES	chr5	147431211	147431493	chr5.147431211	+	7.31024	NA	intron (NM_028291, intron 1 of 18)	(TG)n|Simple_repeat|Simple_repeat	772	NM_028291	72587	Mm.320469	NM_028291	ENSMUSG00000029647	Pan3	2700050F09Rik|A430027N15Rik|AU014670	PAN3 polyA specific ribonuclease subunit homolog (S. cerevisiae)	protein-coding
ALL_peak_53604	NO	YES	chr17	80561146	80561370	chr17.80561146	+	7.31024	NA	intron (NM_001033443, intron 1 of 9)	RSINE1|SINE|B4	2576	NM_001033443	381113	Mm.329216	NM_001033443	ENSMUSG00000033966	Cdkl4	AU067824|Gm942	cyclin-dependent kinase-like 4	protein-coding
ALL_peak_21775	NO	YES	chr11	110444450	110444721	chr11.110444450	+	7.31024	NA	intron (NM_011943, intron 1 of 11)	intron (NM_011943, intron 1 of 11)	45463	NM_011943	26399	Mm.14487	NM_011943	ENSMUSG00000020623	Map2k6	MEK6|MKK6|Prkmk6|SAPKK3	mitogen-activated protein kinase kinase 6	protein-coding
ALL_peak_111454	NO	YES	chr8	68269833	68270080	chr8.68269833	+	7.31024	NA	Intergenic	RMER17C|LTR|ERVK	-6572	NM_028182	72281	Mm.40974	NM_028182	ENSMUSG00000053886	Sh2d4a	2210402M20Rik|SH2A	SH2 domain containing 4A	protein-coding
ALL_peak_37721	NO	YES	chr14	79552226	79552471	chr14.79552226	+	7.31024	NA	intron (NM_001286411, intron 2 of 8)	(TG)n|Simple_repeat|Simple_repeat	-35343	NM_026474	67955	Mm.18972	NM_026474	ENSMUSG00000022024	Sugt1	2410174K12Rik|SGT1	SGT1, suppressor of G2 allele of SKP1 (S. cerevisiae)	protein-coding
ALL_peak_82558	NO	YES	chr4	95483442	95483670	chr4.95483442	+	7.31024	NA	Intergenic	(CA)n|Simple_repeat|Simple_repeat	-73951	NM_001113412	75578	Mm.276098	NM_029347	ENSMUSG00000028573	Fggy	2310009E04Rik	FGGY carbohydrate kinase domain containing	protein-coding
ALL_peak_74609	NO	YES	chr3	89526920	89527174	chr3.89526920	+	7.31024	NA	intron (NM_080466, intron 1 of 7)	(TG)n|Simple_repeat|Simple_repeat	6883	NM_080466	140493	Mm.120250	NM_080466		Kcnn3	KCa2.3|SK3|SKCA3	potassium intermediate/small conductance calcium-activated channel, subfamily N, member 3	protein-coding
ALL_peak_22119	NO	YES	chr11	115491379	115491616	chr11.115491379	+	7.31024	NA	intron (NM_015807, intron 1 of 4)	(TG)n|Simple_repeat|Simple_repeat	317	NM_015807	50773	Mm.390379	NM_015807	ENSMUSG00000020736	Nt5c	Dnt|Dnt1|Umph-2|Umph2	5',3'-nucleotidase, cytosolic	protein-coding
ALL_peak_96068	NO	YES	chr6	52481441	52481666	chr6.52481441	+	7.31024	NA	Intergenic	IMPB_01|Satellite|Satellite	-10898	NR_046049	74304	Mm.490579	NR_046049	ENSMUSG00000107895	1700094M24Rik	-	RIKEN cDNA 1700094M24 gene	ncRNA
ALL_peak_91207	NO	YES	chr5	114138618	114138875	chr5.114138618	+	7.31024	NA	3' UTR (NM_001040691, exon 7 of 7)	3' UTR (NM_001040691, exon 7 of 7)	7590	NM_011677	22256	Mm.1393	NM_011677	ENSMUSG00000029591	Ung	UNG1|UNG2	uracil DNA glycosylase	protein-coding
ALL_peak_62410	NO	YES	chr2	14217301	14217501	chr2.14217301	+	7.31024	NA	intron (NM_001081310, intron 3 of 3)	(TG)n|Simple_repeat|Simple_repeat	-12013	NM_008625	17533	Mm.2019	NM_008625	ENSMUSG00000026712	Mrc1	AW259686|CD206|MR	mannose receptor, C type 1	protein-coding
ALL_peak_121078	NO	YES	chr9	124123614	124123869	chr9.124123614	+	7.31024	NA	intron (NM_009917, intron 1 of 1)	(GA)n|Simple_repeat|Simple_repeat	2198	NM_009917	12774	Mm.14302	NM_009917	ENSMUSG00000079227	Ccr5	AM4-7|CD195|Cmkbr5	chemokine (C-C motif) receptor 5	protein-coding
ALL_peak_80836	NO	YES	chr4	59552482	59552710	chr4.59552482	+	7.31024	NA	Intergenic	(CA)n|Simple_repeat|Simple_repeat	-3232	NM_144904	230257	Mm.331640	NM_144904	ENSMUSG00000028382	Ptbp3	5830471K22Rik|AA407443|AI462022|AW107884|C86549|Rod1	polypyrimidine tract binding protein 3	protein-coding
ALL_peak_107401	NO	YES	chr7	131036779	131037005	chr7.131036779	+	7.31024	NA	intron (NM_007769, intron 2 of 46)	(TG)n|Simple_repeat|Simple_repeat	4816	NM_007769	12945	Mm.4138	NM_007769	ENSMUSG00000047517	Dmbt1	CRP|CRP-[a]|CRP-[b]|Crpd|DBMT1|gp300|p80	deleted in malignant brain tumors 1	protein-coding
ALL_peak_107312	NO	YES	chr7	129680133	129680410	chr7.129680133	+	7.31024	NA	Intergenic	RLTR17B_Mm|LTR|ERVK	88408	NM_172255	207425	Mm.229323	NM_172255	ENSMUSG00000042055	Wdr11	2900055P10Rik|AW489876|Brwd2|mKIAA1351	WD repeat domain 11	protein-coding
ALL_peak_63190	NO	YES	chr2	30919005	30919238	chr2.30919005	+	7.31024	NA	Intergenic	ID|SINE|ID	-15824	NM_022415	64292	Mm.28768	NM_022415	ENSMUSG00000050737	Ptges	2410099E23Rik|D2Ertd369e|Pges|mPGES|mPGES-1	prostaglandin E synthase	protein-coding
ALL_peak_49546	NO	YES	chr16	96341243	96341465	chr16.96341243	+	7.31024	NA	Intergenic	(CA)n|Simple_repeat|Simple_repeat	-20403	NM_001177887	72058	Mm.119714	NM_028078	ENSMUSG00000000159	Igsf5	2010003D20Rik|JCAM|Jam4	immunoglobulin superfamily, member 5	protein-coding
ALL_peak_29705	NO	YES	chr13	31327374	31327717	chr13.31327374	+	7.31024	NA	Intergenic	Intergenic	-86459	NR_045957	73924	Mm.417825	NR_045957	ENSMUSG00000087460	4930401O12Rik	-	RIKEN cDNA 4930401O12 gene	ncRNA
ALL_peak_74649	NO	YES	chr3	90253526	90254190	chr3.90253526	+	7.31024	NA	promoter-TSS (NM_028881)	promoter-TSS (NM_028881)	-423	NM_028881	74343	Mm.35627	NM_028881	ENSMUSG00000027936	Crtc2	4632407F12Rik|Torc2|mTORC2	CREB regulated transcription coactivator 2	protein-coding
ALL_peak_65680	NO	YES	chr2	84634327	84634595	chr2.84634327	+	7.31024	NA	intron (NM_007615, intron 1 of 19)	(TC)n|Simple_repeat|Simple_repeat	16049	NM_001085453	12388	Mm.35738	NM_007615	ENSMUSG00000034101	Ctnnd1	AA409437|AU019353|Catns|Ctnnd|P120|mKIAA0384	catenin (cadherin associated protein), delta 1	protein-coding
ALL_peak_22201	NO	YES	chr11	116770393	116770725	chr11.116770393	+	7.31024	NA	intron (NM_011371, intron 1 of 8)	(TG)n|Simple_repeat|Simple_repeat	4948	NM_011371	20445	Mm.436887	NM_011371	ENSMUSG00000009588	St6galnac1	Siat7a	ST6 (alpha-N-acetyl-neuraminyl-2,3-beta-galactosyl-1,3)-N-acetylgalactosaminide alpha-2,6-sialyltransferase 1	protein-coding
ALL_peak_45955	NO	YES	chr16	25408229	25408533	chr16.25408229	+	7.31024	NA	intron (NM_175165, intron 4 of 5)	(TG)n|Simple_repeat|Simple_repeat	121564	NM_175165	71338	Mm.126851	NM_175165	ENSMUSG00000048399	Tprg	5430420C16Rik|Tprg1	transformation related protein 63 regulated	protein-coding
ALL_peak_114113	NO	YES	chr8	117112456	117112685	chr8.117112456	+	7.31024	NA	intron (NM_001163028, intron 5 of 11)	(CA)n|Simple_repeat|Simple_repeat	16705	NM_021486	63857	Mm.174133	NM_021486	ENSMUSG00000031845	Bco1	Bcdo|Bcdo1|Bcmo1|CMO1|Cmoi|beta-CD|betaCMOOX	beta-carotene oxygenase 1	protein-coding
ALL_peak_116017	NO	YES	chr9	30896941	30897201	chr9.30896941	+	7.31024	NA	Intergenic	Intergenic	25381	NM_001024139	235130	Mm.65867	NM_001024139	ENSMUSG00000033453	Adamts15	-	a disintegrin-like and metallopeptidase (reprolysin type) with thrombospondin type 1 motif, 15	protein-coding
ALL_peak_79636	NO	YES	chr4	35012578	35012813	chr4.35012578	+	7.31024	NA	intron (NM_178061, intron 2 of 3)	intron (NM_178061, intron 2 of 3)	-101214	NR_040652	73696	Mm.1361	NR_040652	ENSMUSG00000085824	Platr9	2410114N07Rik	pluripotency associated transcript 9	ncRNA
ALL_peak_22561	NO	YES	chr12	4430833	4431378	chr12.4430833	+	7.31024	NA	intron (NM_010881, intron 1 of 22)	(CAGG)n|Simple_repeat|Simple_repeat	46077	NM_010881	17977	Mm.301039	NM_010881	ENSMUSG00000020647	Ncoa1	KAT13A|SRC-1|SRC1|bHLHe74	nuclear receptor coactivator 1	protein-coding
ALL_peak_31120	NO	YES	chr13	59649781	59650079	chr13.59649781	+	7.31024	NA	intron (NM_001035122, intron 4 of 9)	intron (NM_001035122, intron 4 of 9)	25854	NM_027307	105348	Mm.171335	NM_027307	ENSMUSG00000021556	Golm1	2310001L02Rik|AW125446|D030064E01Rik|GP73|Golph2|PSEC0257	golgi membrane protein 1	protein-coding
ALL_peak_51716	NO	YES	chr17	45753320	45753836	chr17.45753320	+	7.31024	NA	Intergenic	(CA)n|Simple_repeat|Simple_repeat	-19734	NM_028164	72240	Mm.482897	NM_028164	ENSMUSG00000094690	1600014C23Rik	-	RIKEN cDNA 1600014C23 gene	protein-coding
ALL_peak_105680	NO	YES	chr7	98157354	98157776	chr7.98157354	+	7.31024	NA	intron (NM_007602, intron 2 of 12)	(CA)n|Simple_repeat|Simple_repeat	4777	NM_001301250	12337	Mm.326847	NM_007602	ENSMUSG00000035547	Capn5	nCL-3	calpain 5	protein-coding
ALL_peak_82157	NO	YES	chr4	87385055	87385258	chr4.87385055	+	7.31024	NA	Intergenic	Intergenic	-154616	NM_172426	76376	Mm.490487	NM_172426	ENSMUSG00000037996	Slc24a2	2810021B17Rik|6330417K15Rik|AI847460|Nckx2	solute carrier family 24 (sodium/potassium/calcium exchanger), member 2	protein-coding
ALL_peak_75460	NO	YES	chr3	106483919	106484176	chr3.106483919	+	7.31024	NA	intron (NR_033207, intron 1 of 1)	intron (NR_033207, intron 1 of 1)	1597	NM_001278941	72121	Mm.14816	NM_028110	ENSMUSG00000027901	Dennd2d	2010308M01Rik|AI451421	DENN/MADD domain containing 2D	protein-coding
ALL_peak_112002	NO	YES	chr8	79361483	79361701	chr8.79361483	+	7.31024	NA	intron (NM_008539, intron 2 of 6)	(TG)n|Simple_repeat|Simple_repeat	37876	NM_008539	17125	Mm.223717	NM_008539	ENSMUSG00000031681	Smad1	AI528653|Madh1|Madr1|Mlp1|MusMLP	SMAD family member 1	protein-coding
[truncated: 122,580 more rows]

## Sheet: Table 4
List 1: Overlap between AHR CHIP-targets (accessible regions) and RNAseq from FICZ-treated WT organoids (4h)						List 2: ("Active AHR targets") Overlap in d4ENR AHRKO vs WT organoids and targets in "List 1"
[truncated: 181 more rows]

## Sheet: Table 5
D4 ENR RNA-seq OVERLAP with ATAC-seq (D4 ENR Ahrko vs WT)
[truncated: 212 more rows]

[truncated: 1 more sheets: Table 6]
